# Supplementary material for: A 1,3-carbonyl shift in the platinum-catalyzed aromatization of 2-epoxy-1-(methoxyalk-2-ynyl)benzenes
Source: Royal Society of Chemistry journal article supplement (doi:10.1039/c002660c), 2010-01-01

## *Supporting Information*

### **A 1,3-Carbonyl Shift in the Platinum-catalyzed Aromatization of 2-Epoxy-1-(methoxyalk-2-ynyl)benzenes**

Rupsha Chaudhuri, Arindam Das, Hsin-Yi Liao and Rai-Shung Liu\*

*\*Department of Chemistry, National Tsing-Hua University, Hsinchu, Taiwan, ROC and ‡Department of Science Education, National  
Taipei University of Education, Taipei, Taiwan, ROC*

----- *rsliu@mx.nthu.edu.tw*

#### *Contents:*

- (1)  $^1\text{H}$  &  $^{13}\text{C}$  spectra of compounds **1a-8** -----S 2- S 91.
- (2) NOE spectra of compounds **6g, 6h, 6i, 6l, 6o & 6p**-----S 92 – S 117.

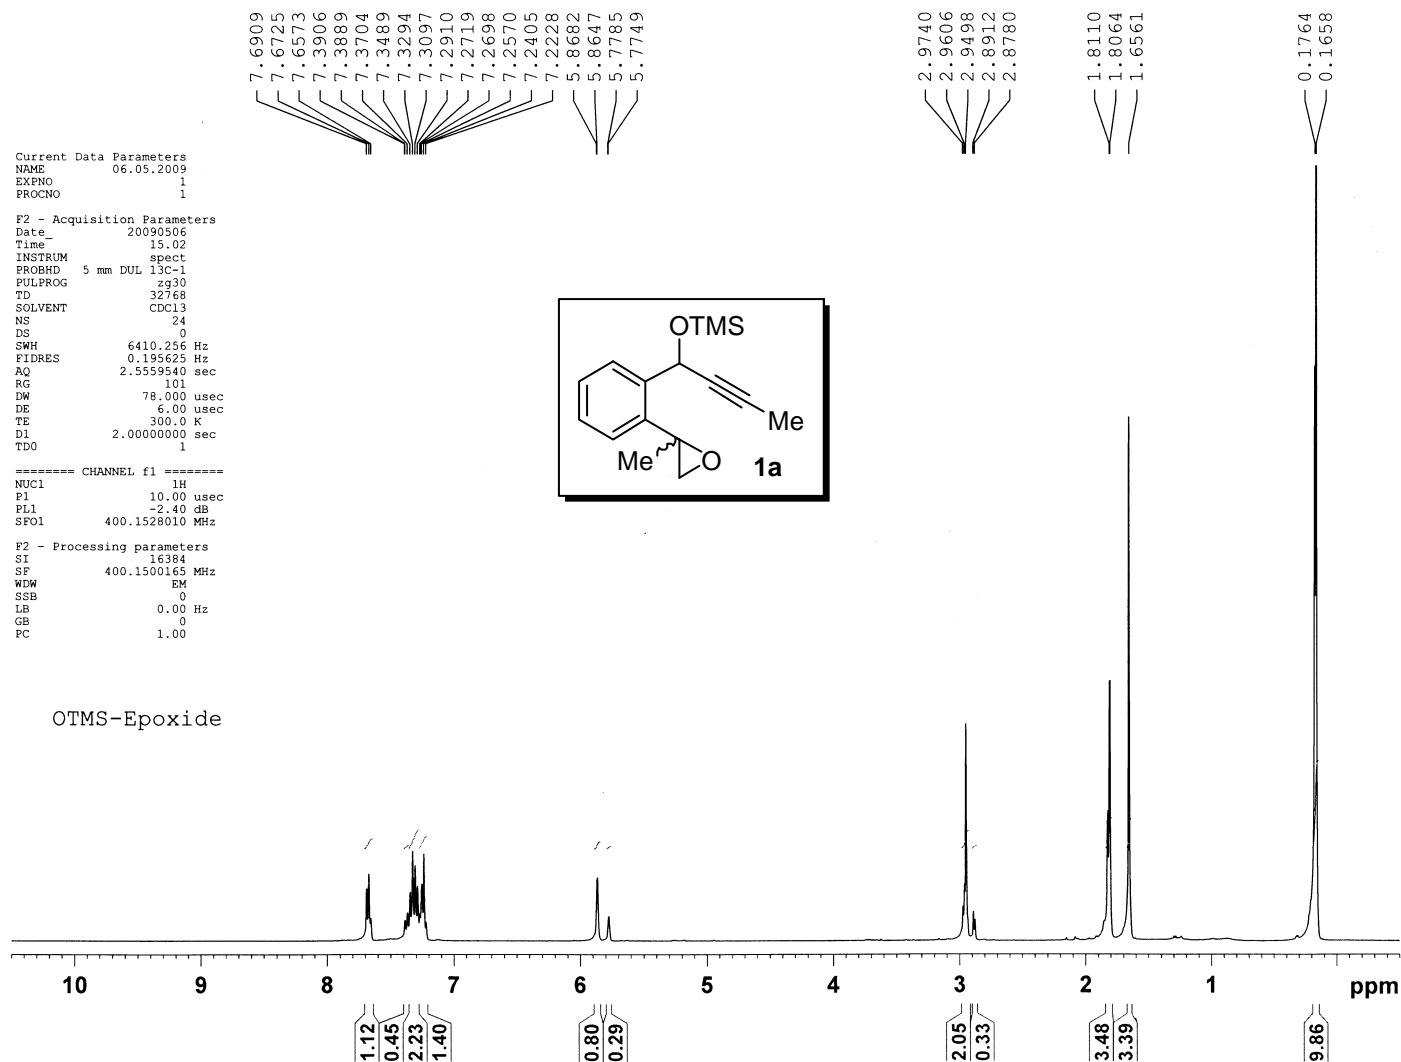

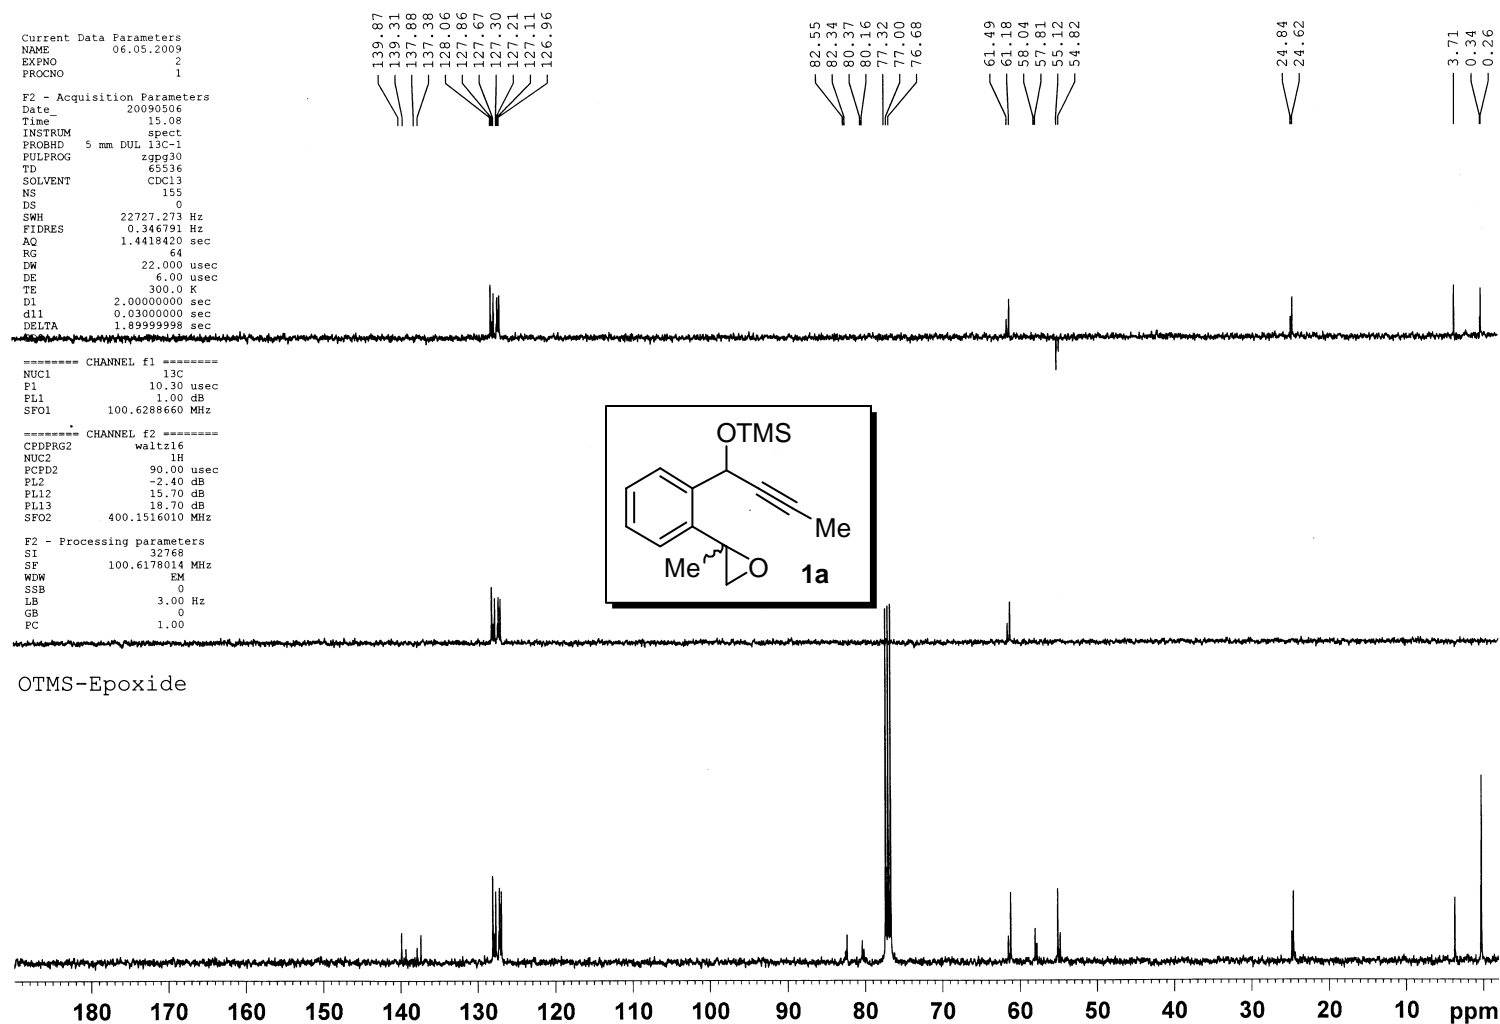

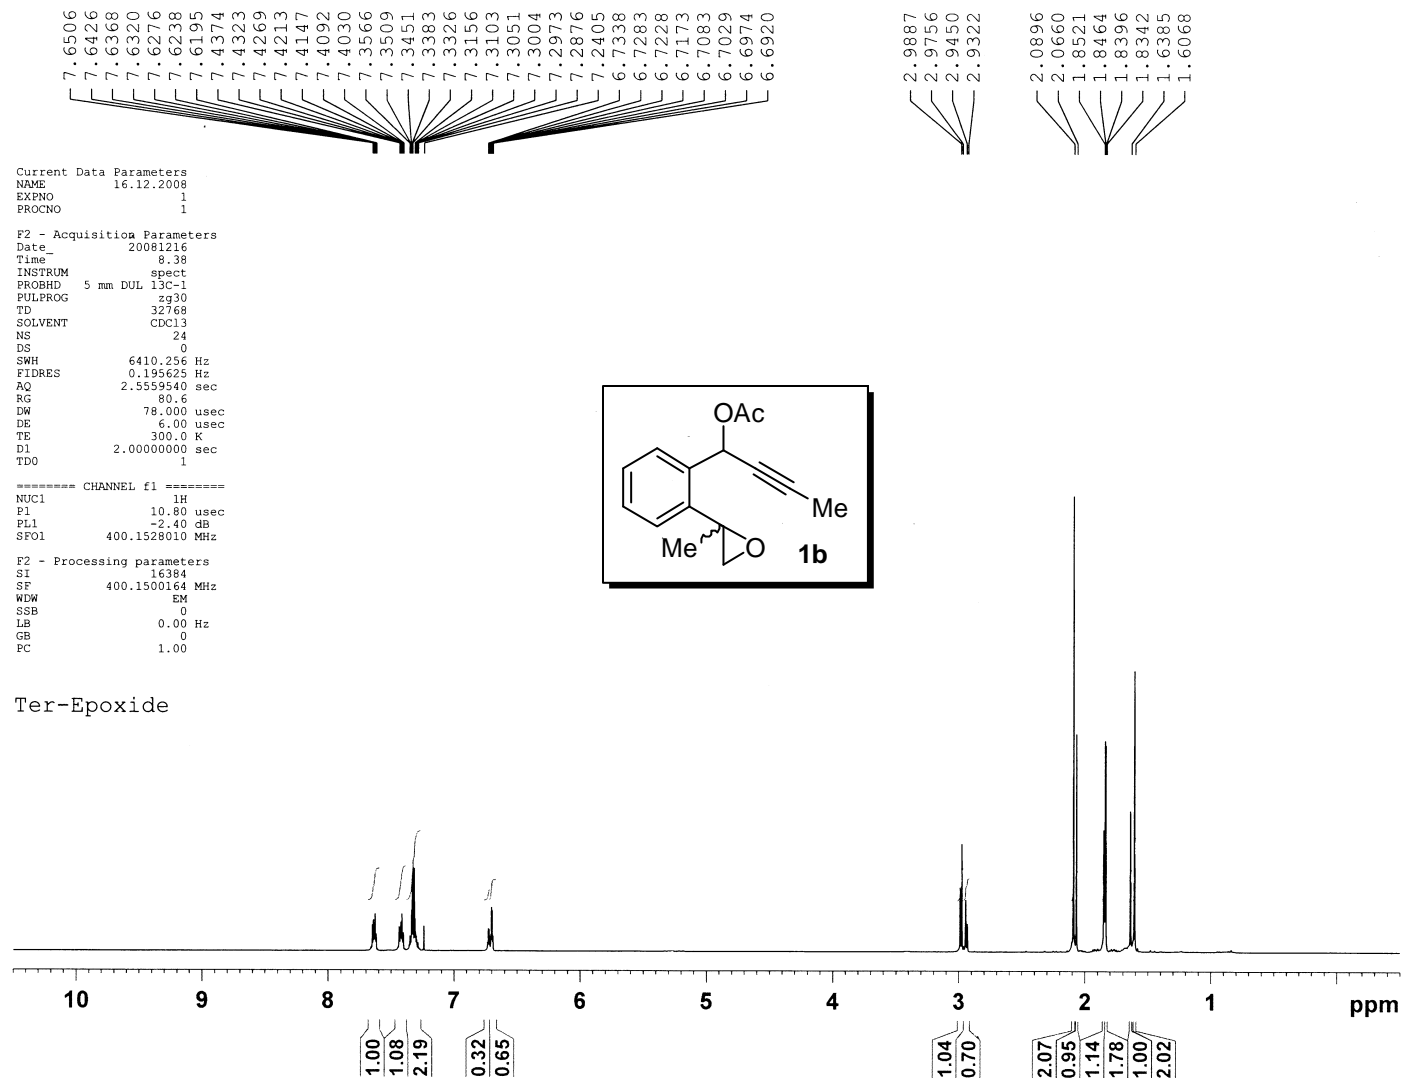

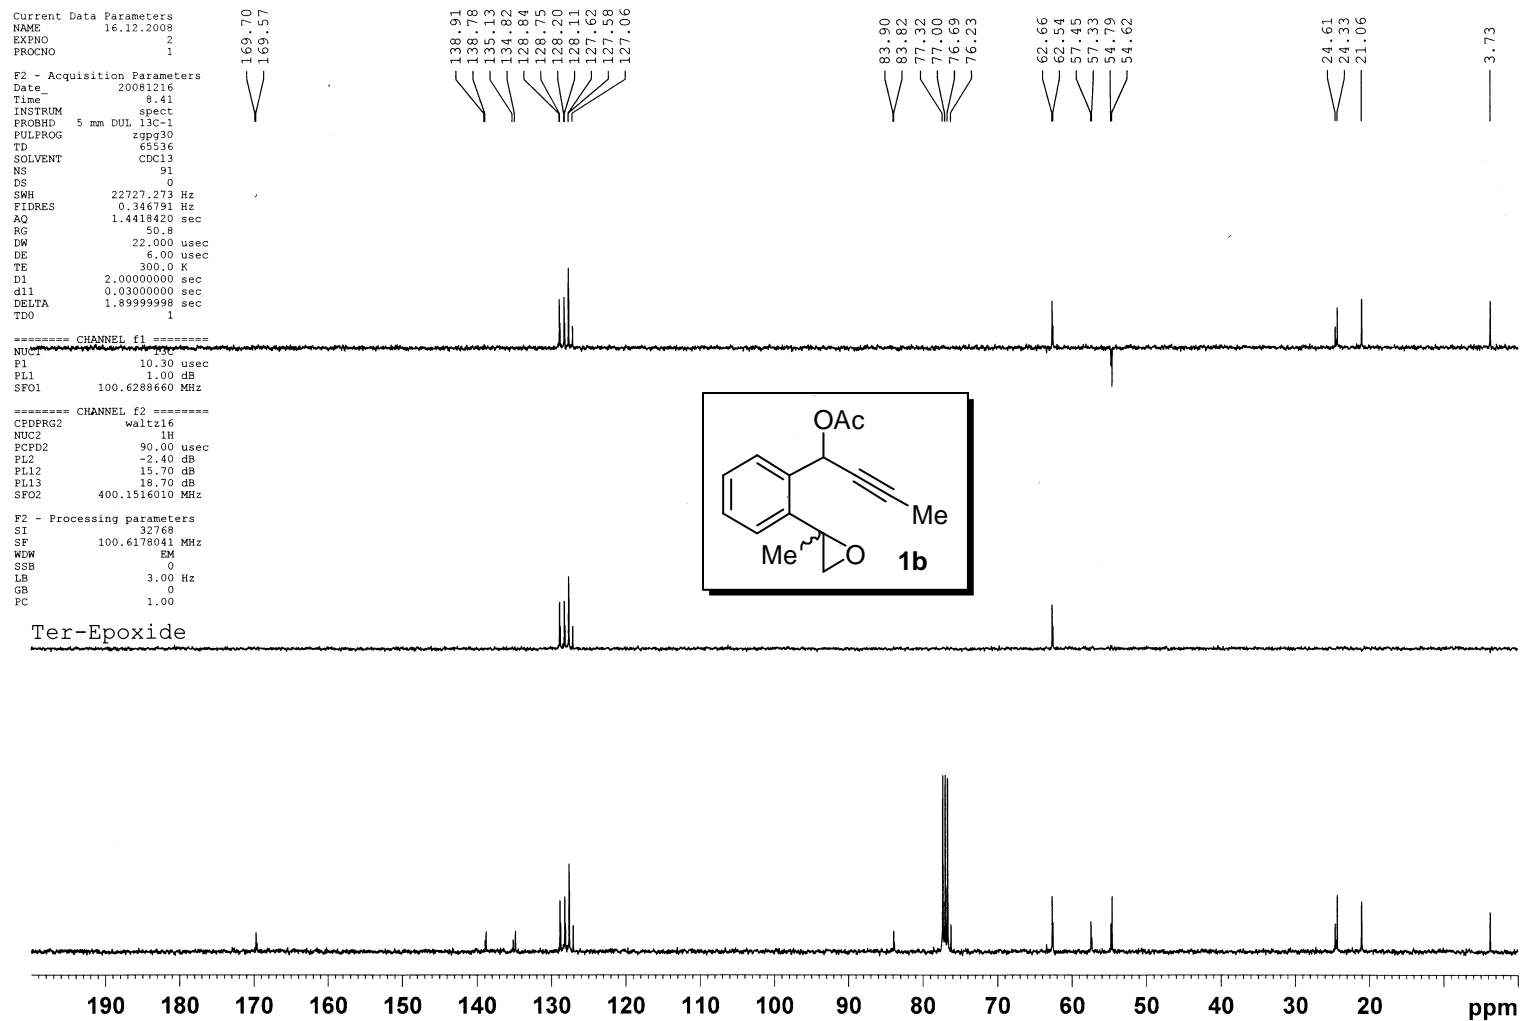

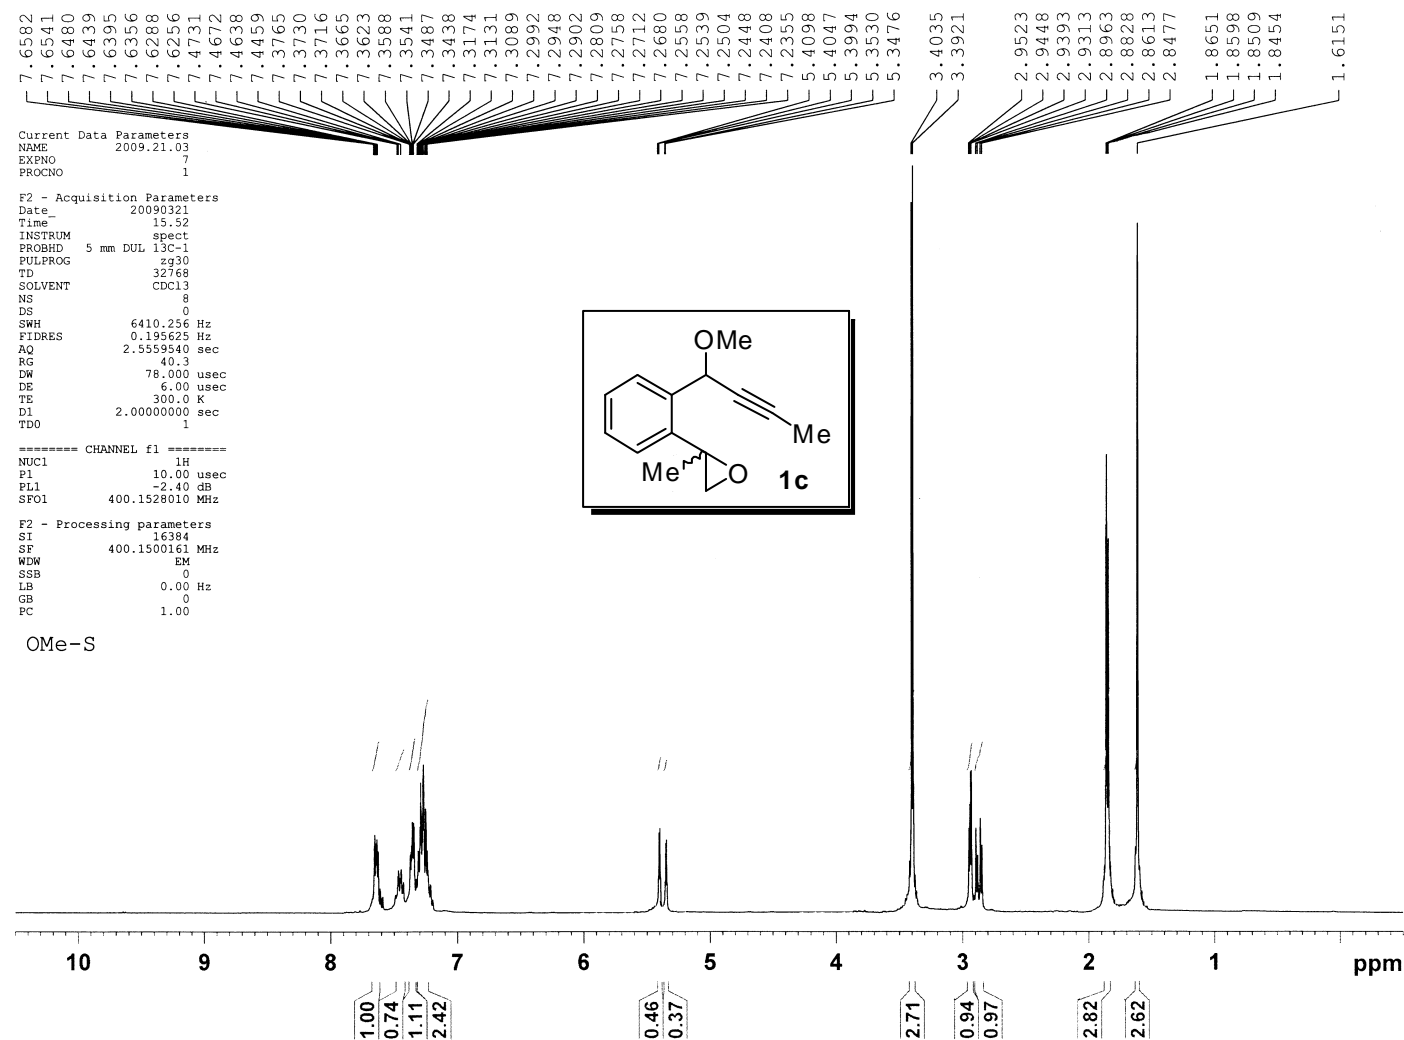

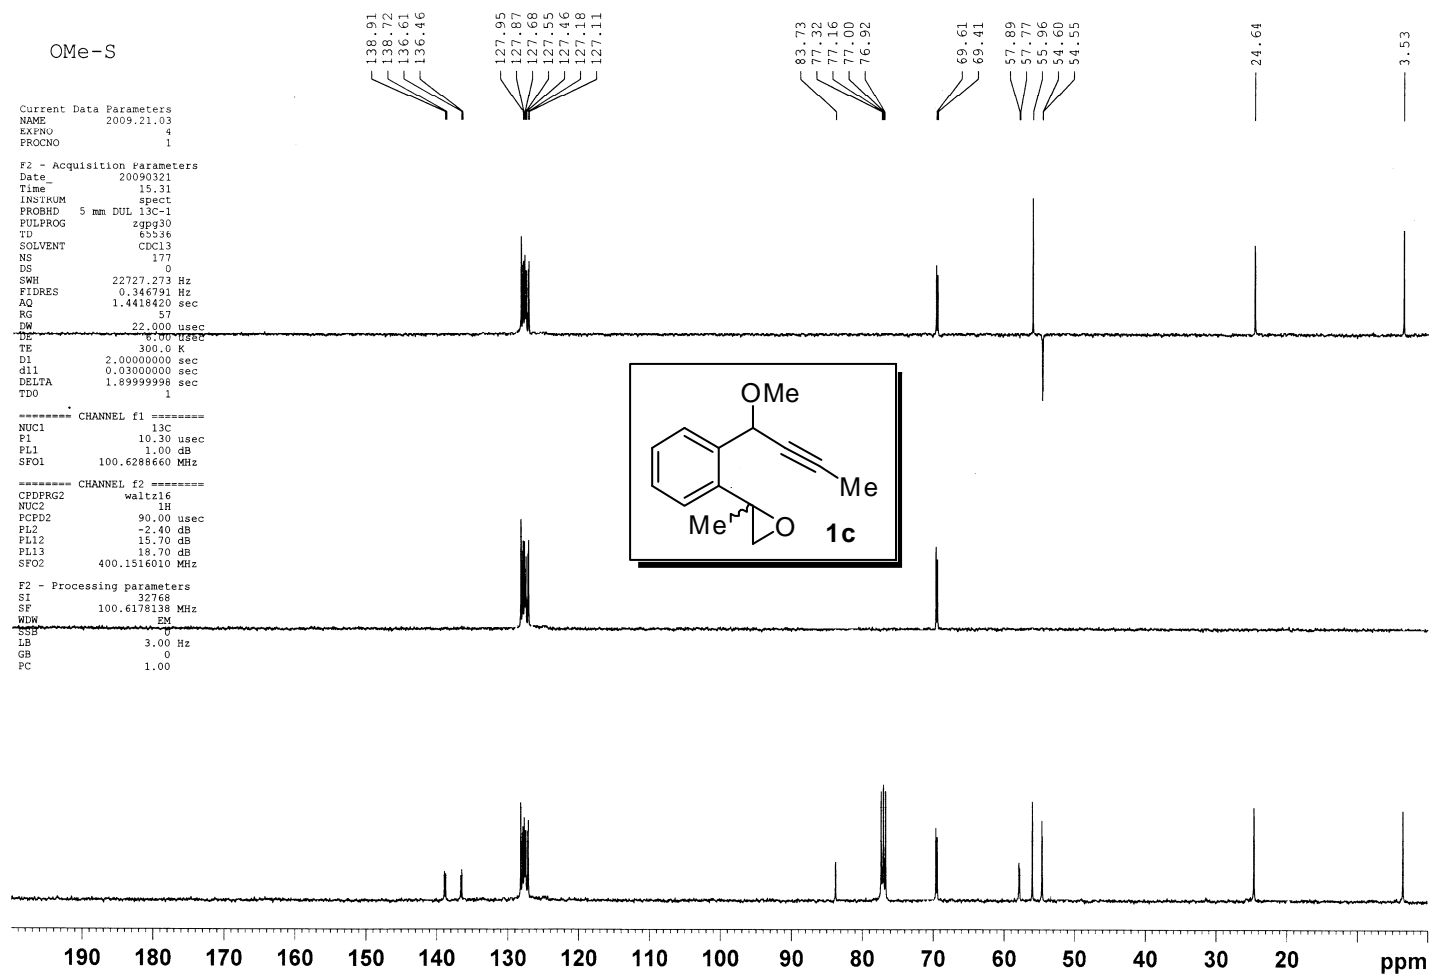

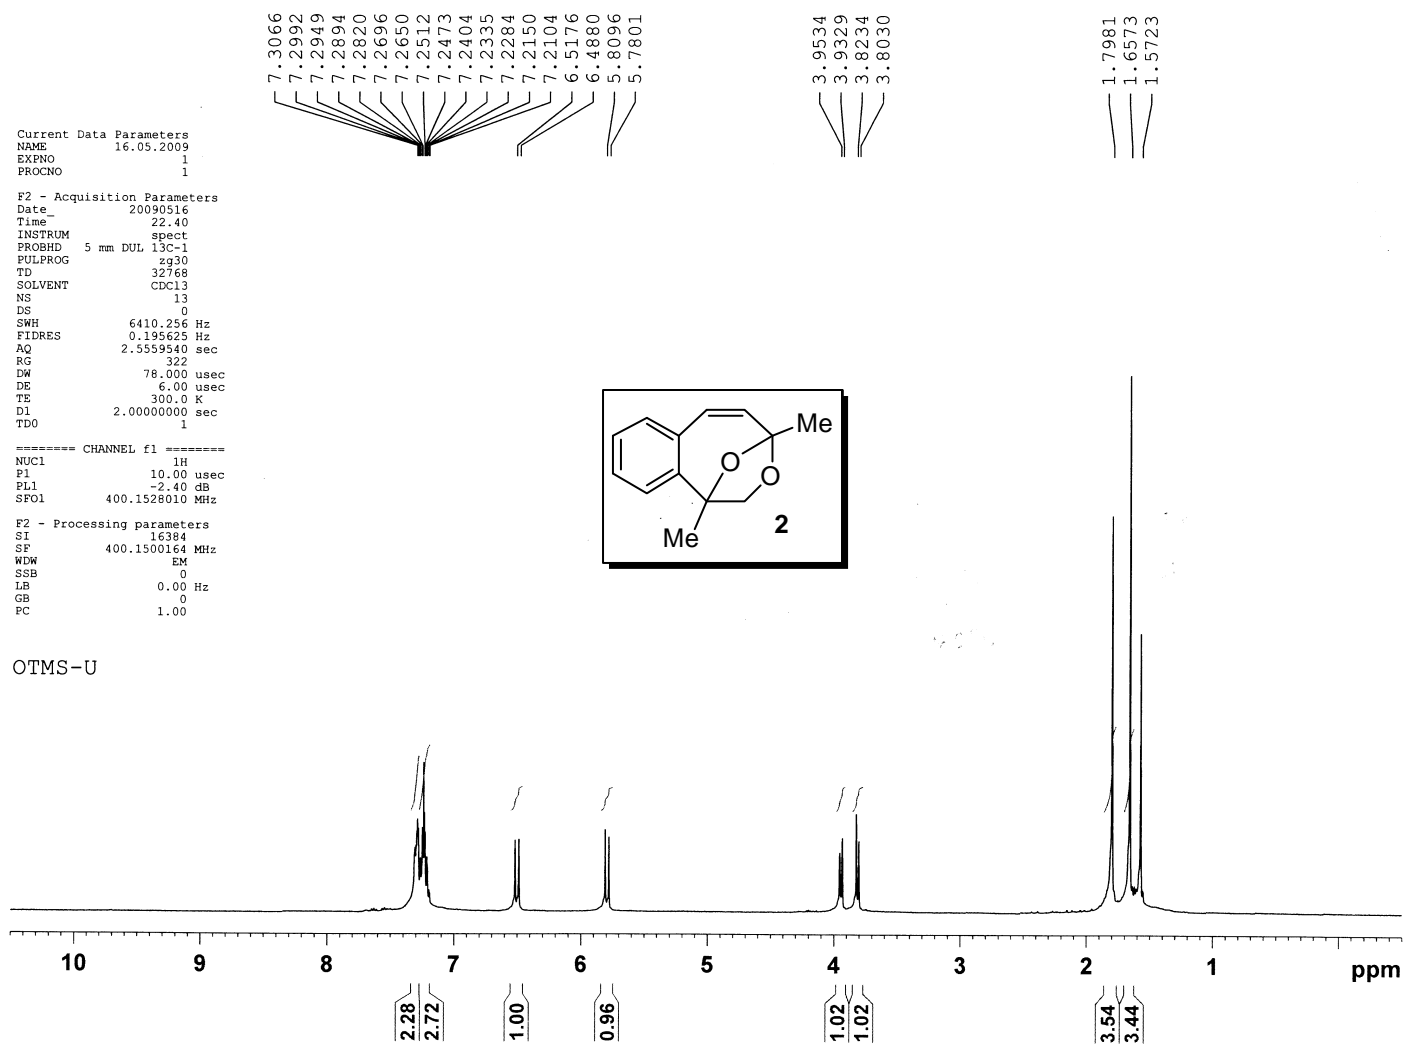



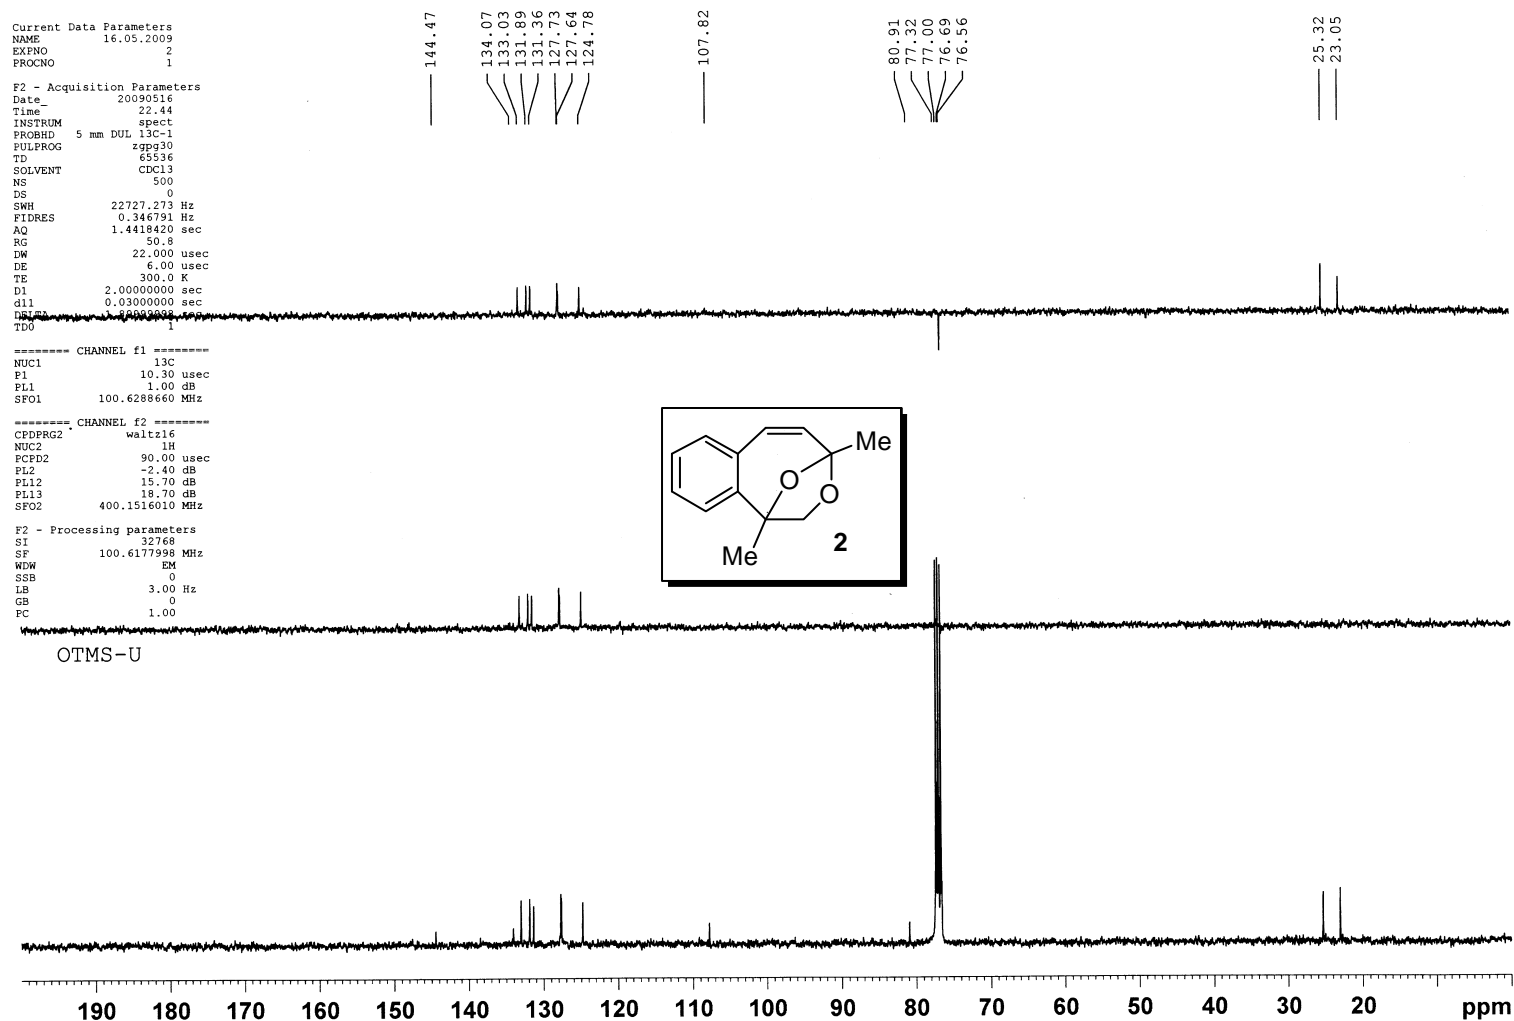

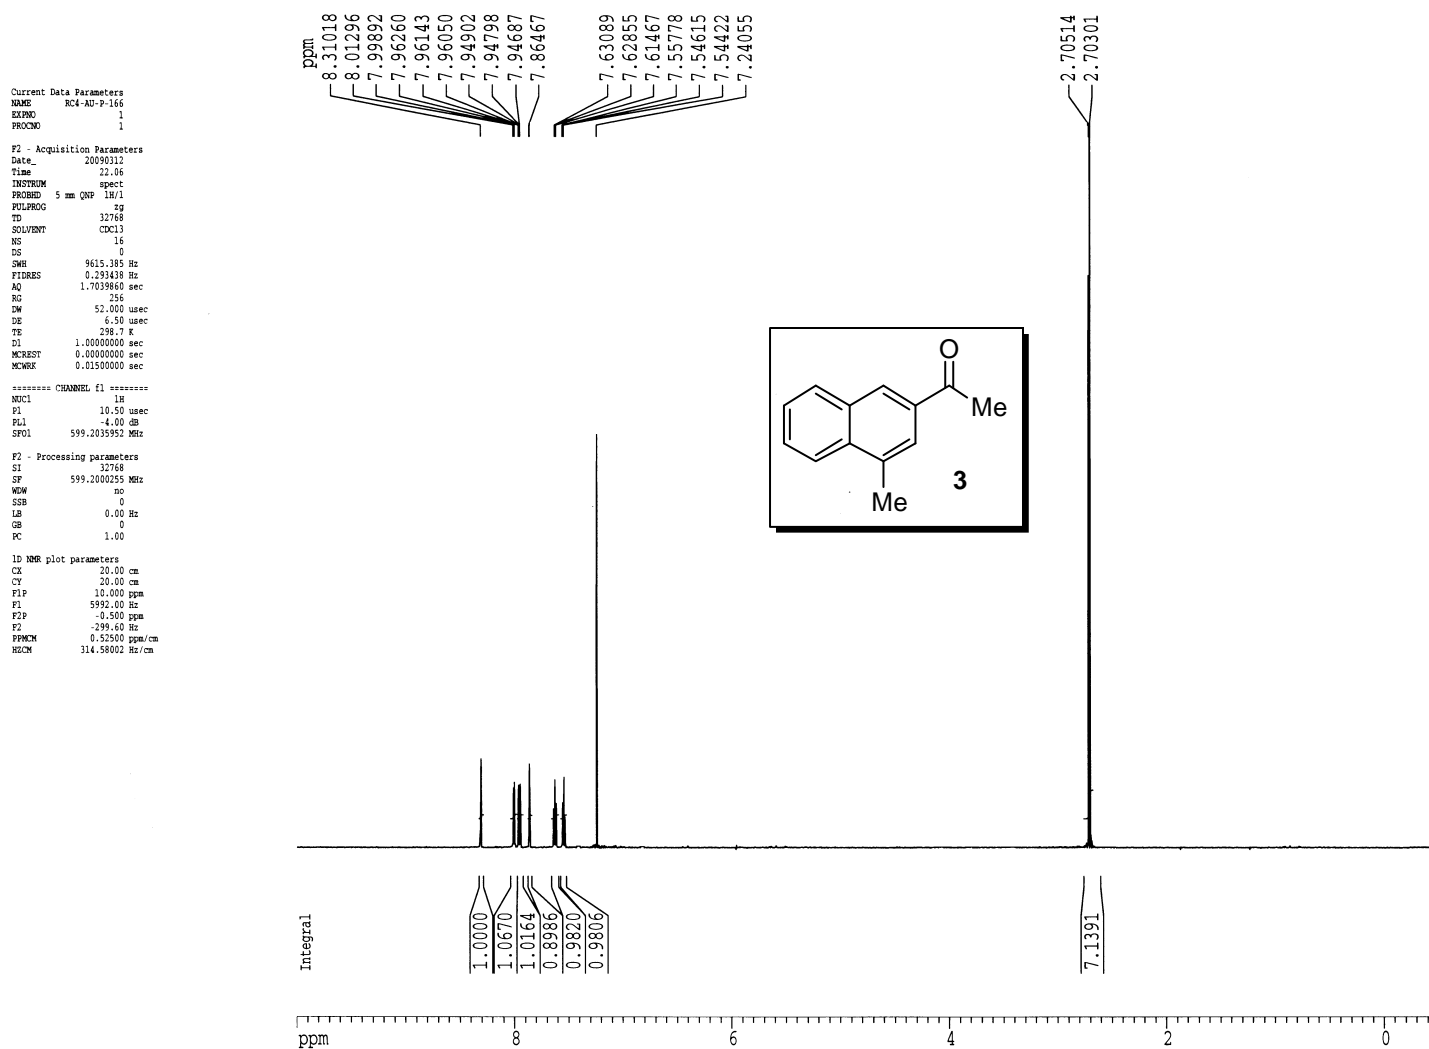

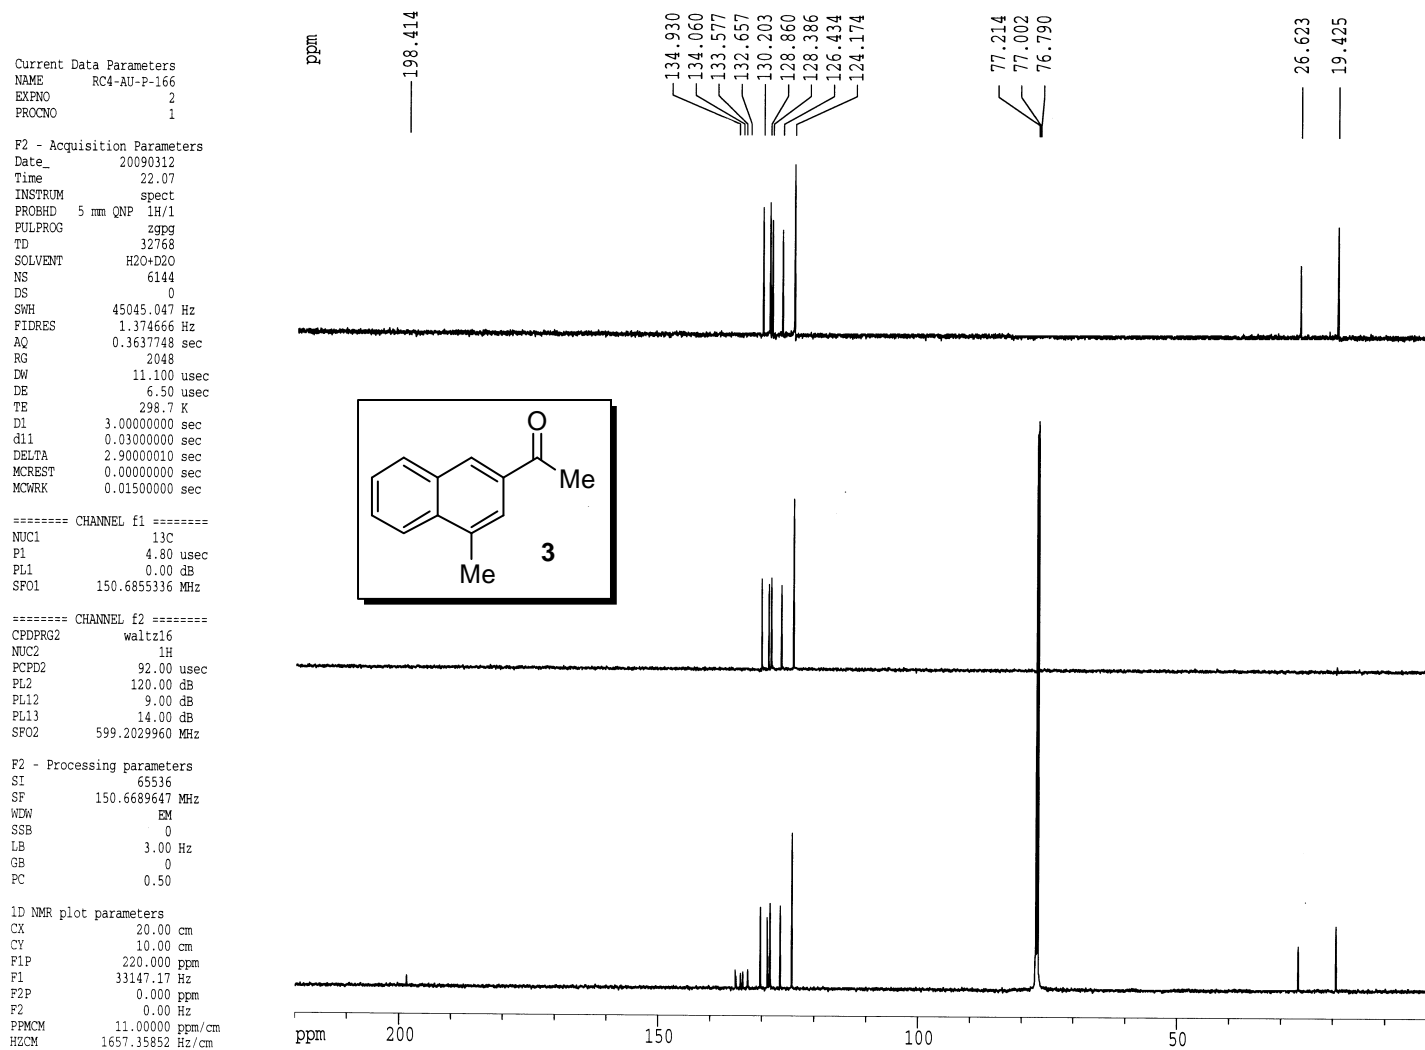

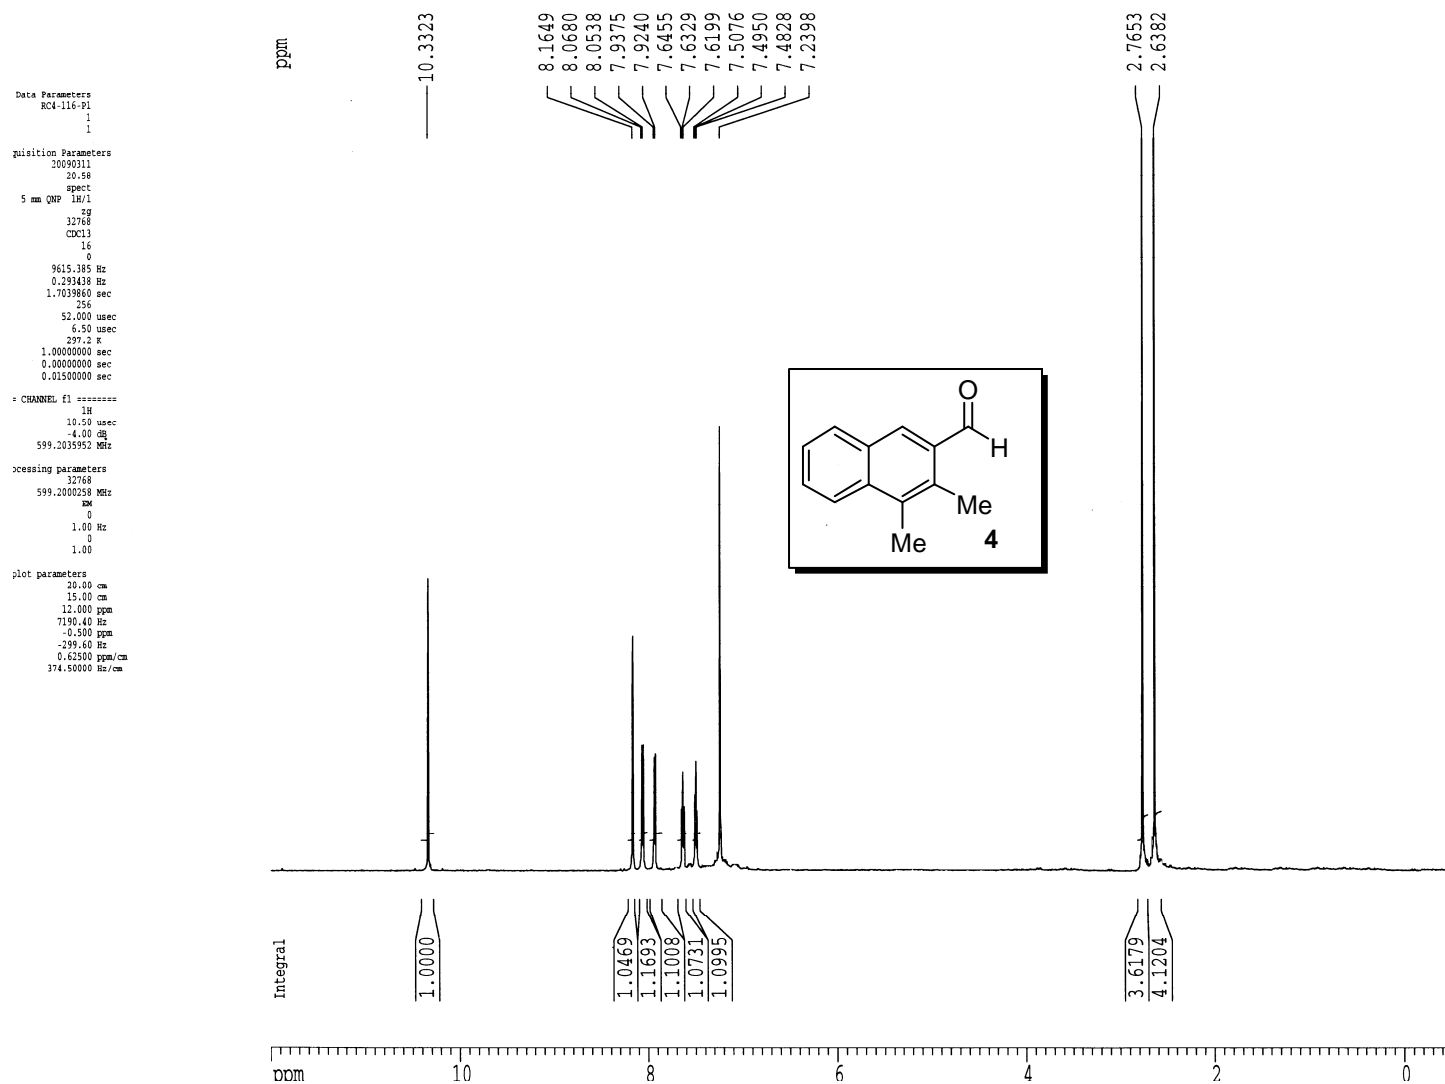

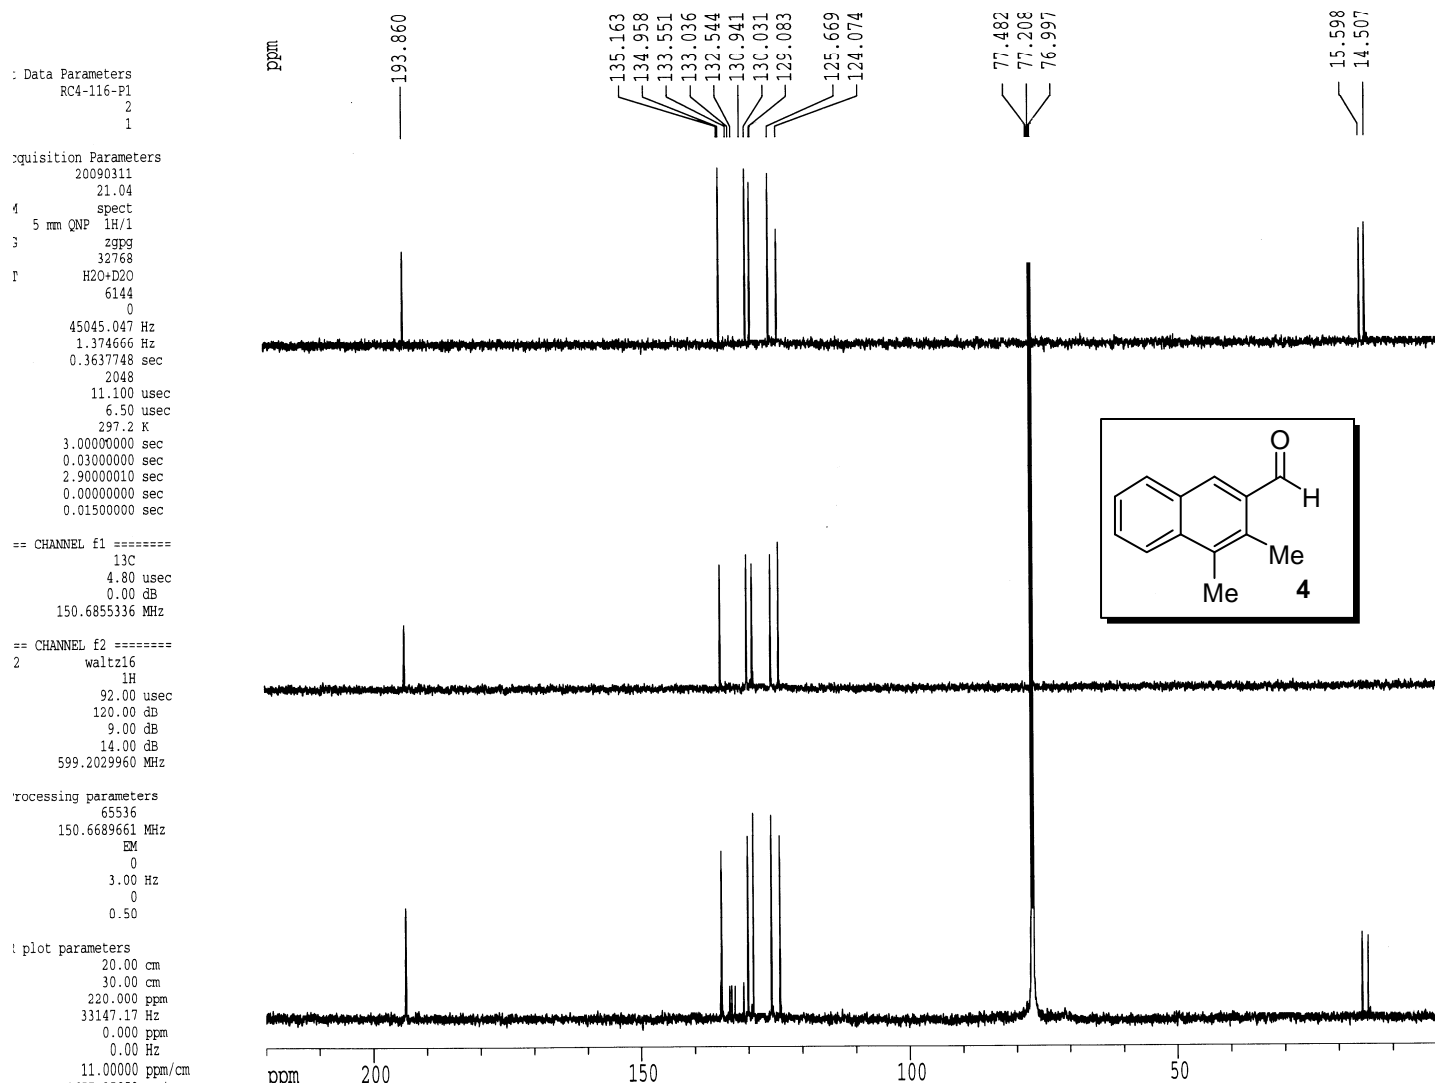

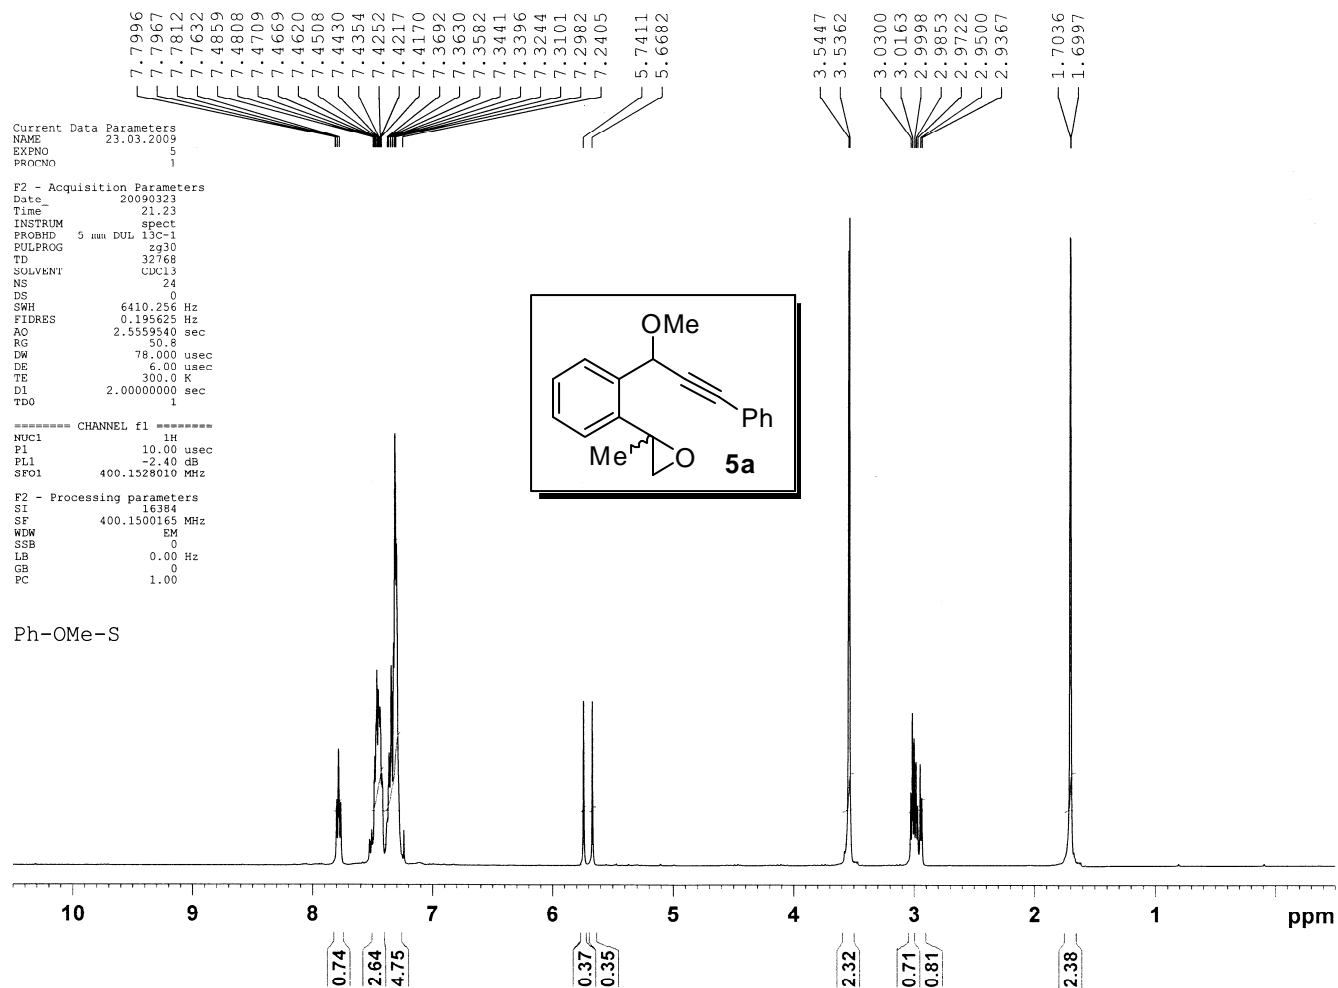

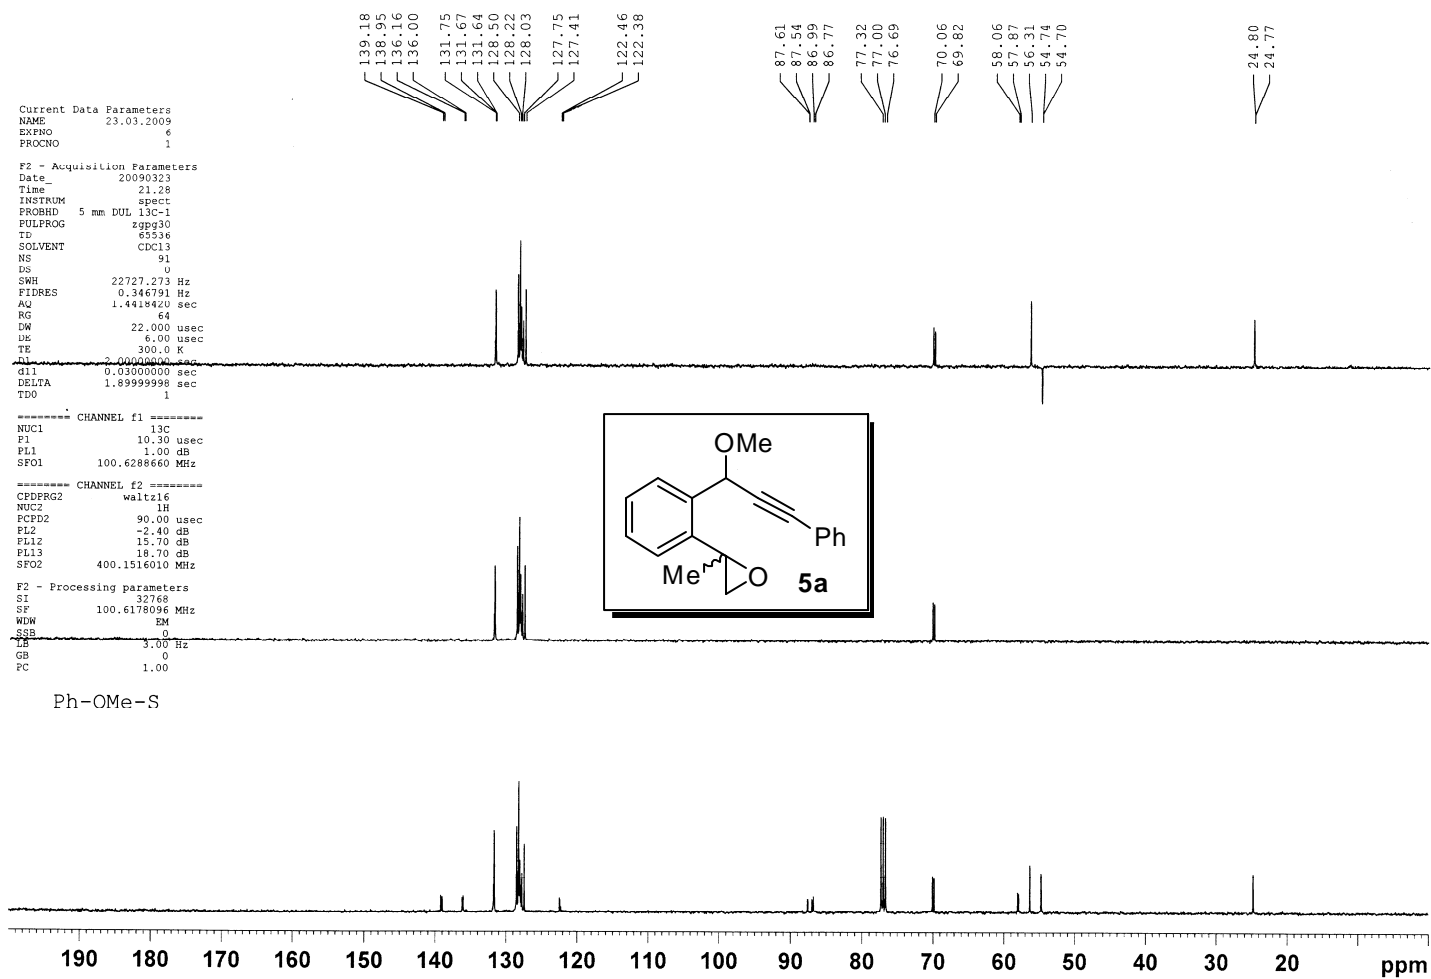

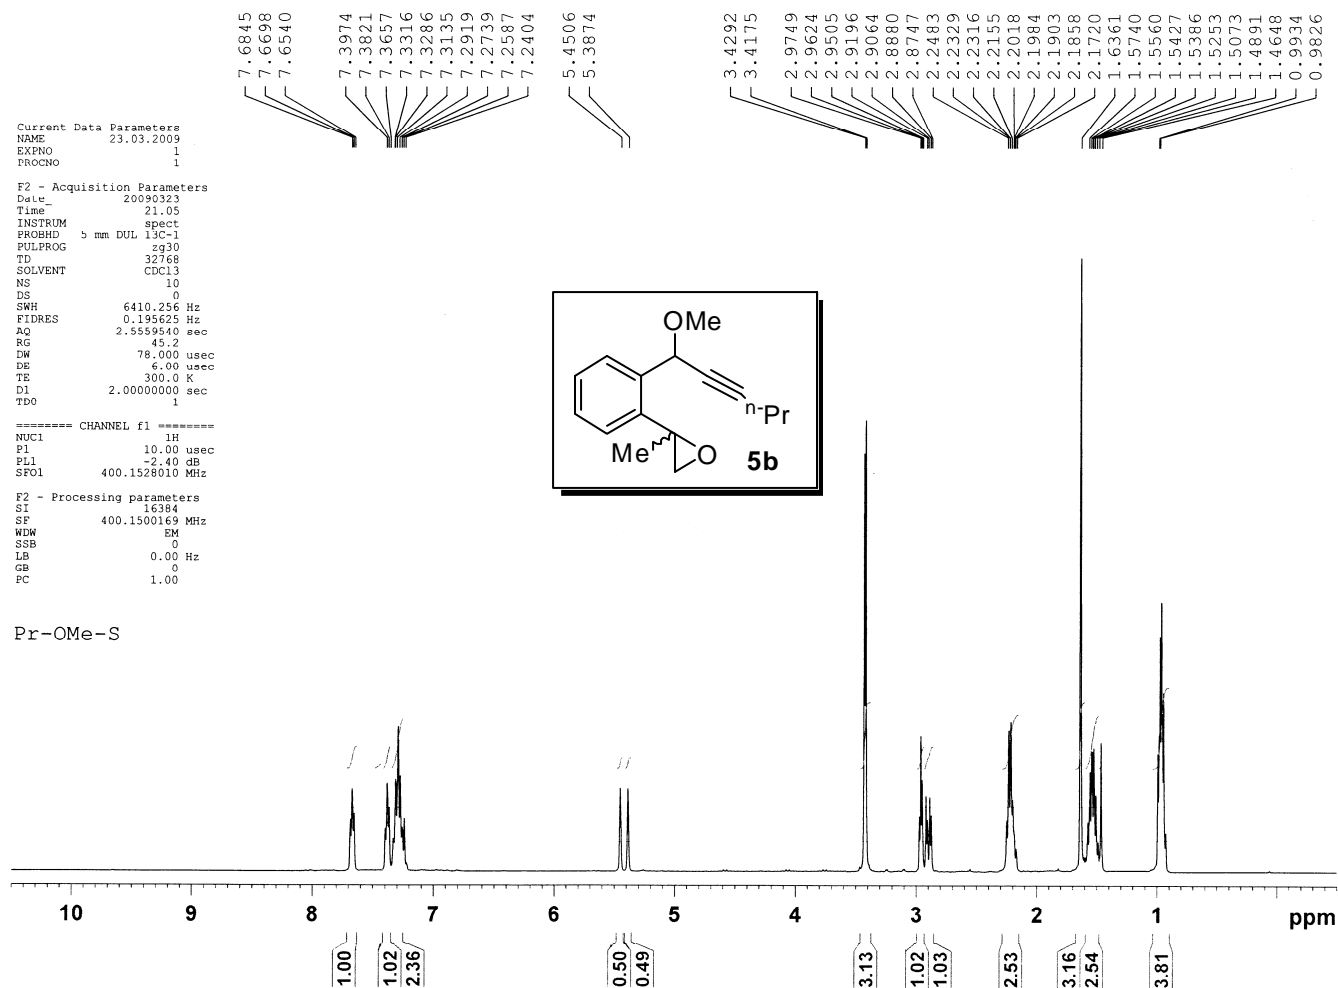



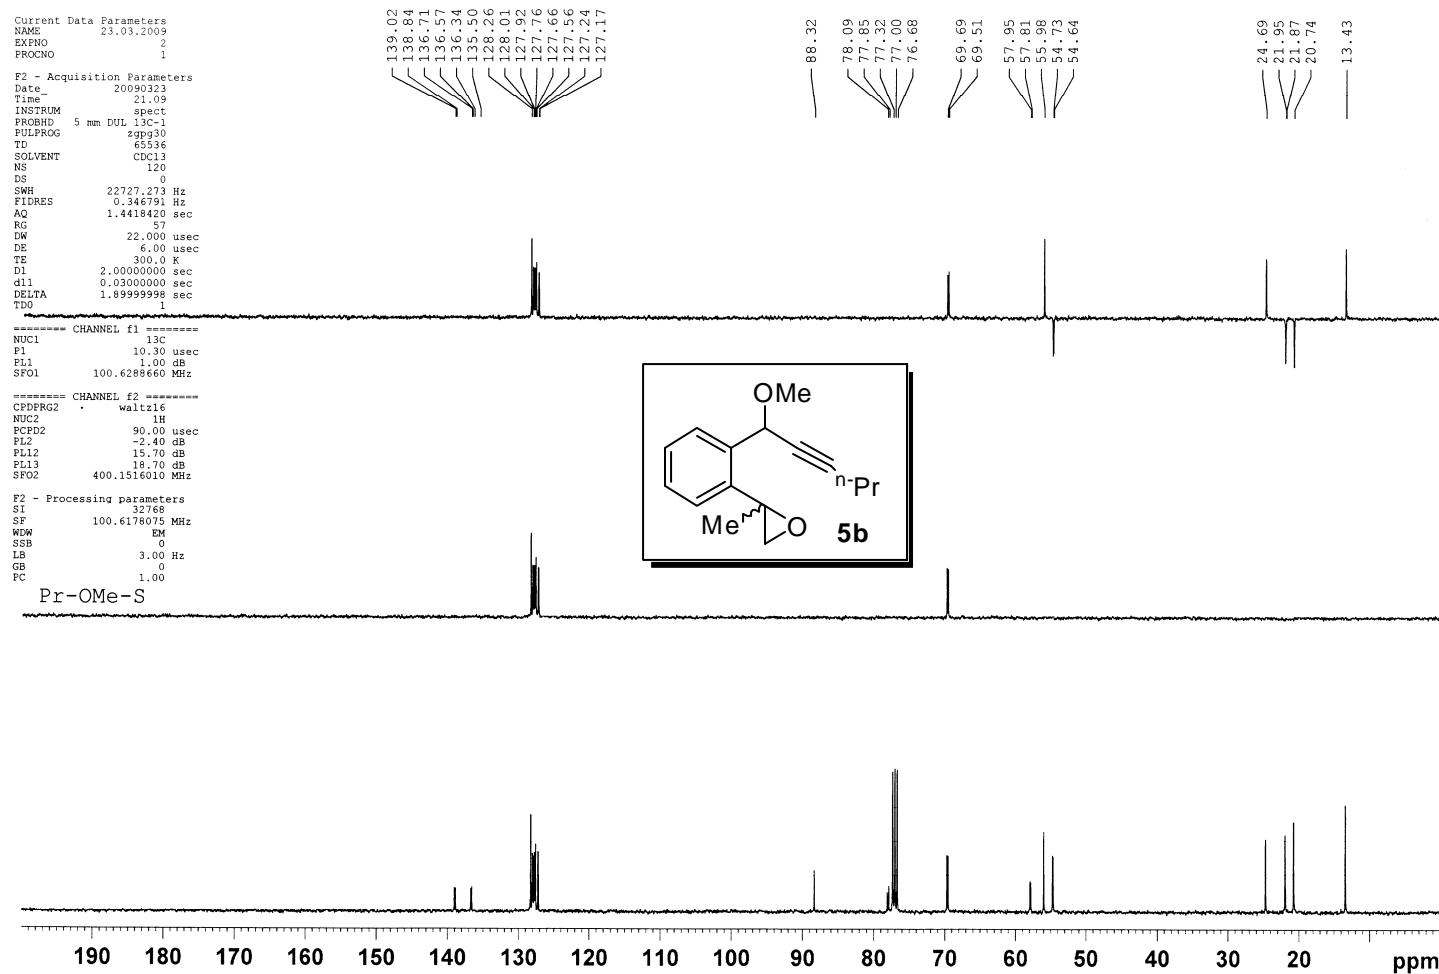

Current Data Parameters  
NAME RC4-196-P  
FNO 1  
XCNO 1

Acquisition Parameters  
Date\_ 20090324  
Time 18.11  
INSTRUM spect  
PROBHD 5 mm QNP 1H/1  
JLPROG zg  
P 32768  
SOLVENT CDCl3  
S 16  
S 0  
VH 8389.262 Hz  
FIDRES 0.256020 Hz  
P 1.9530228 sec  
S 32  
V 59.600 usec  
S 6.50 usec  
S 295.8 K  
L 1.00000000 sec  
CREST 0.00000000 sec  
CWPRK 0.01500000 sec

===== CHANNEL f1 =====  
JC1 1H  
P 10.50 usec  
S 4.00 dB  
F01 599.2029960 MHz

Processing parameters  
F 32768  
P 599.2000249 MHz  
S no  
SB 0  
S 0.00 Hz  
S 0  
S 1.00

NMR plot parameters  
X 20.00 cm  
Y 12.00 cm  
LP 10.000 ppm  
F 5992.00 Hz  
P 0.500 ppm  
S -299.60 Hz  
PMCM 0.52500 ppm/cm  
ZCM 314.58002 Hz/cm

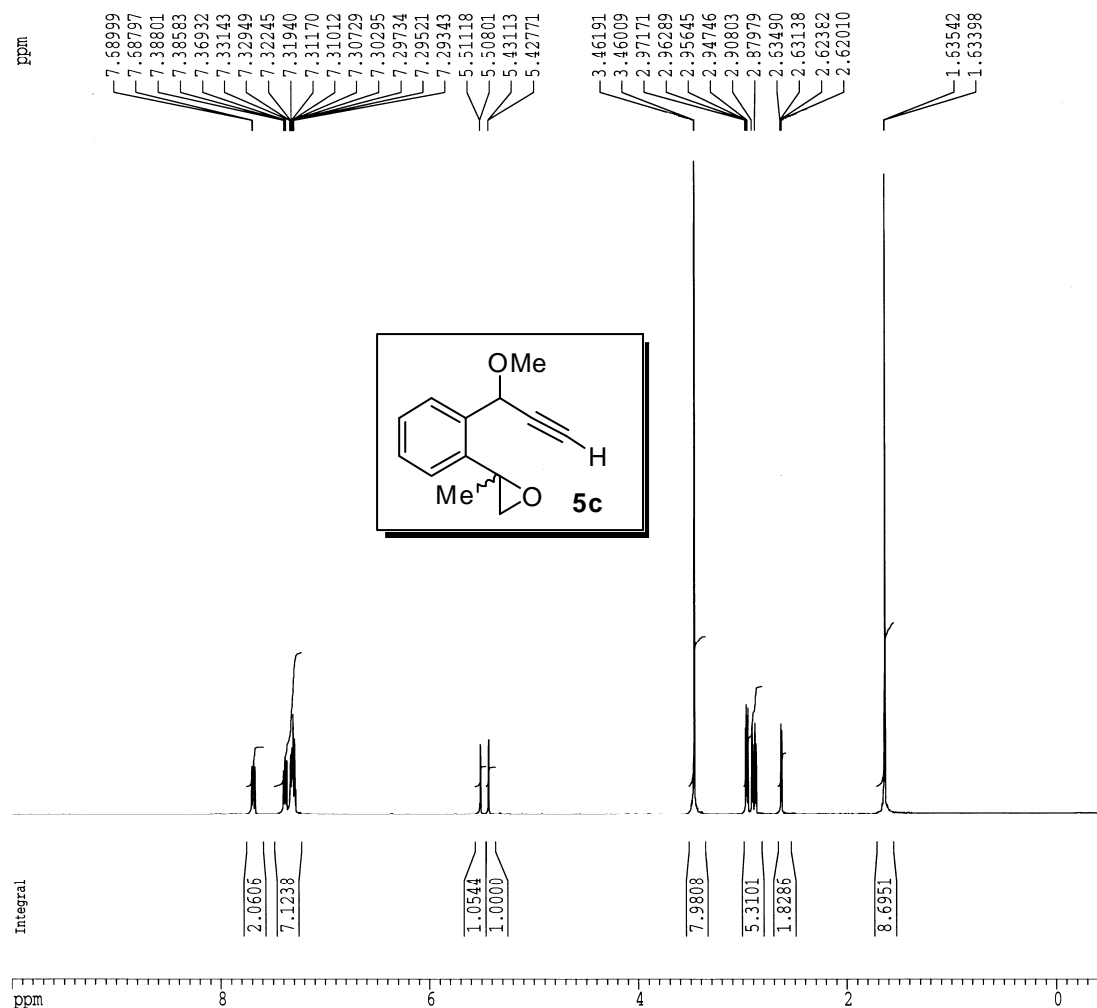

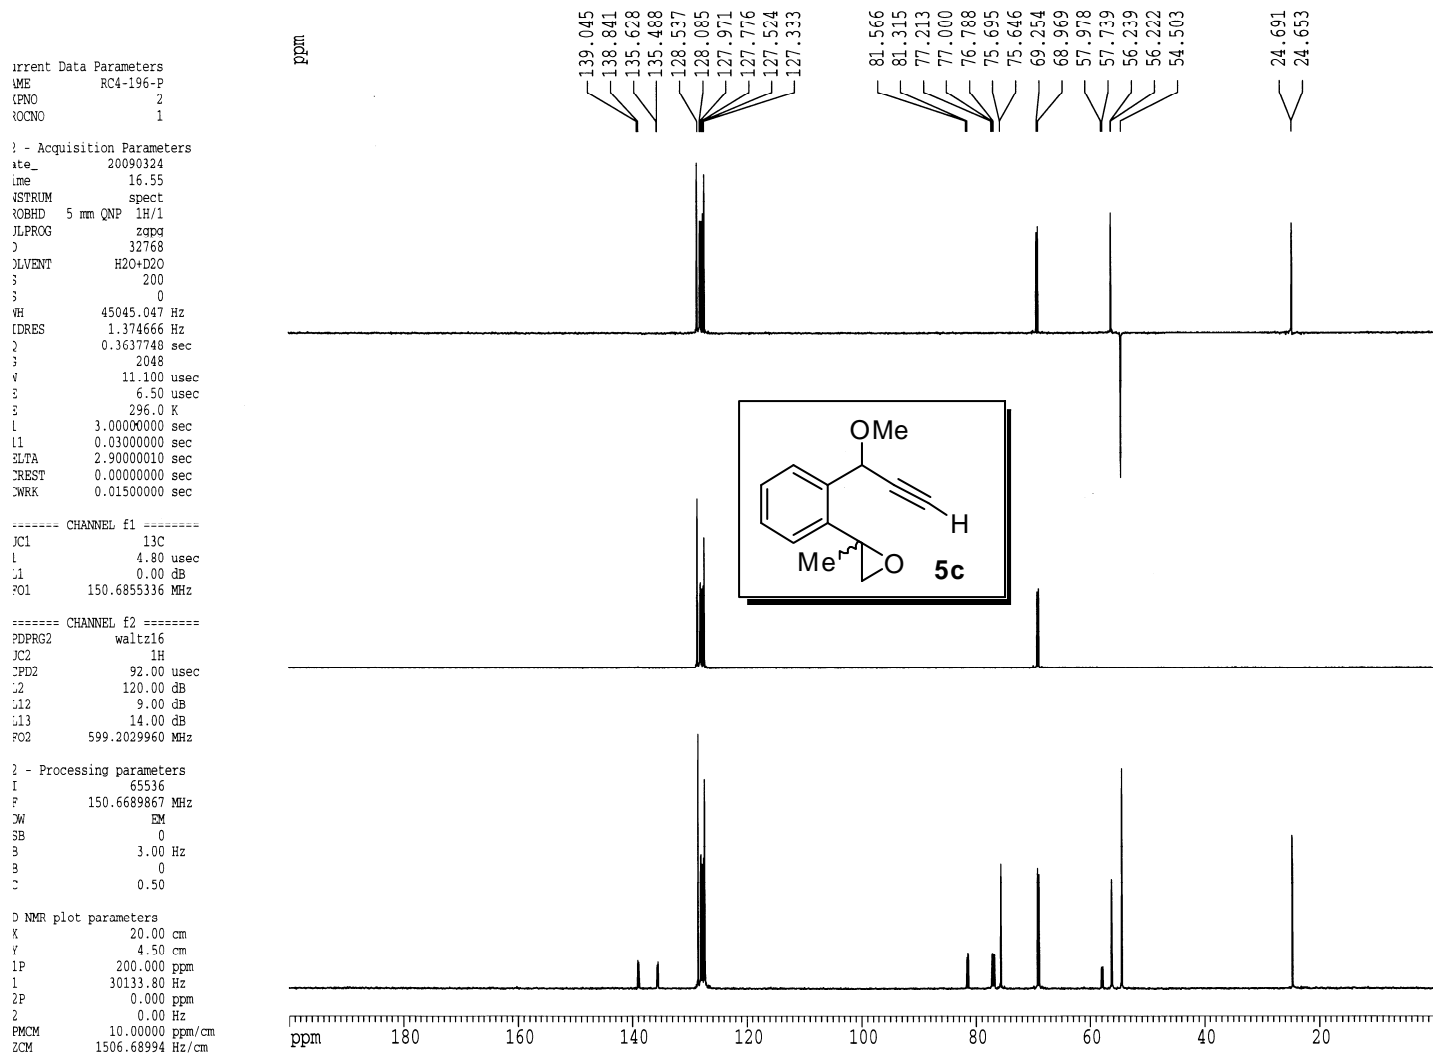

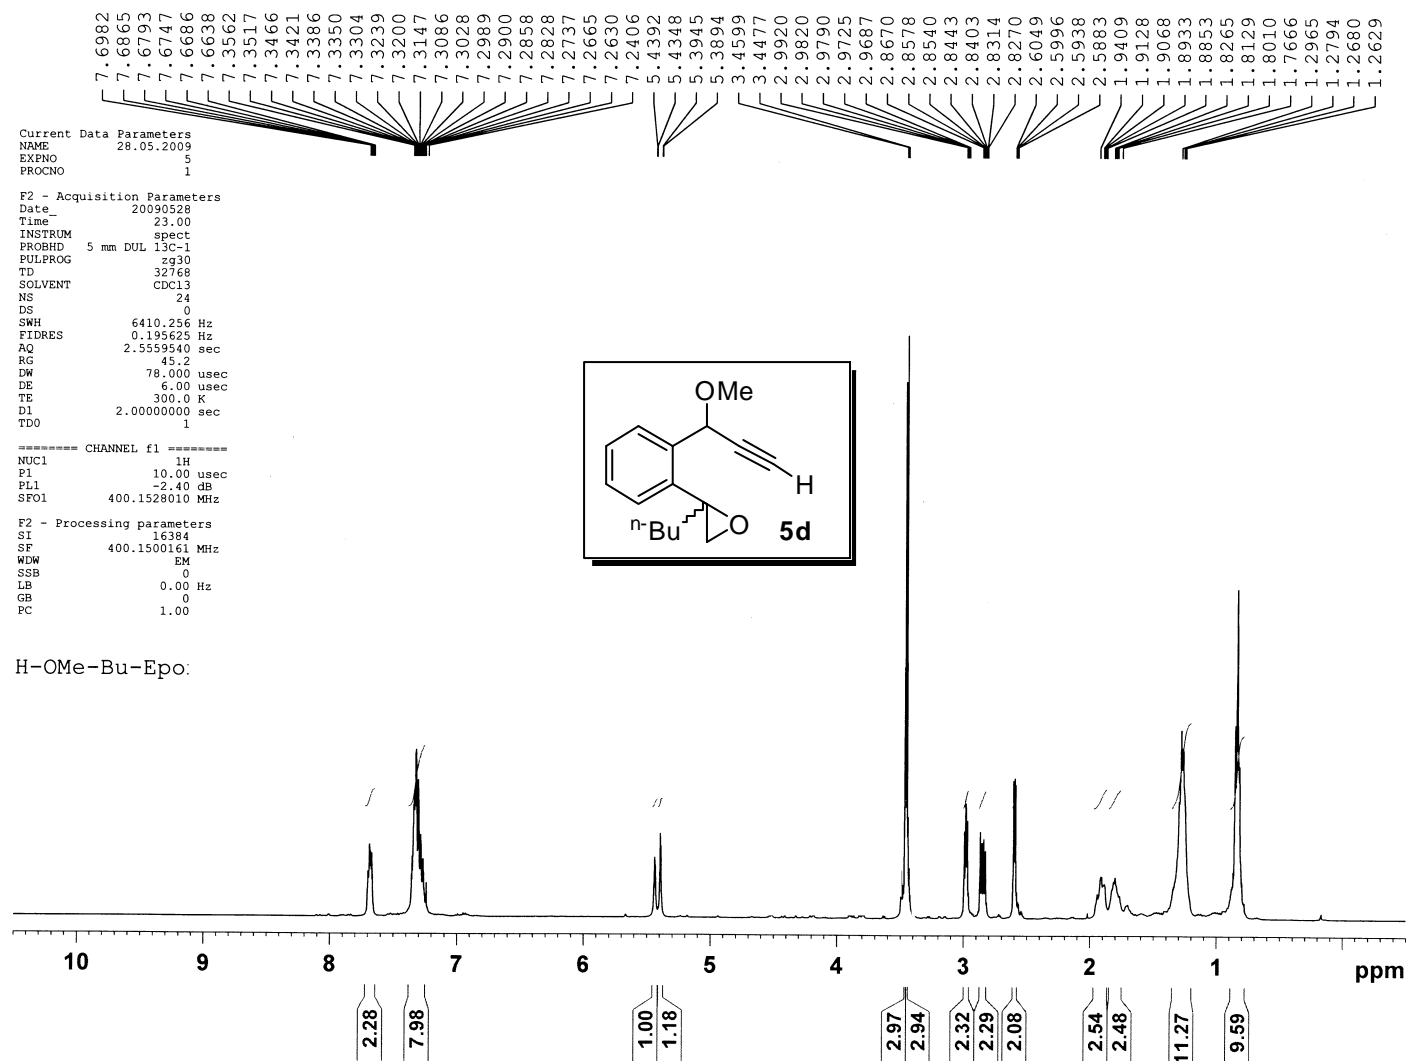

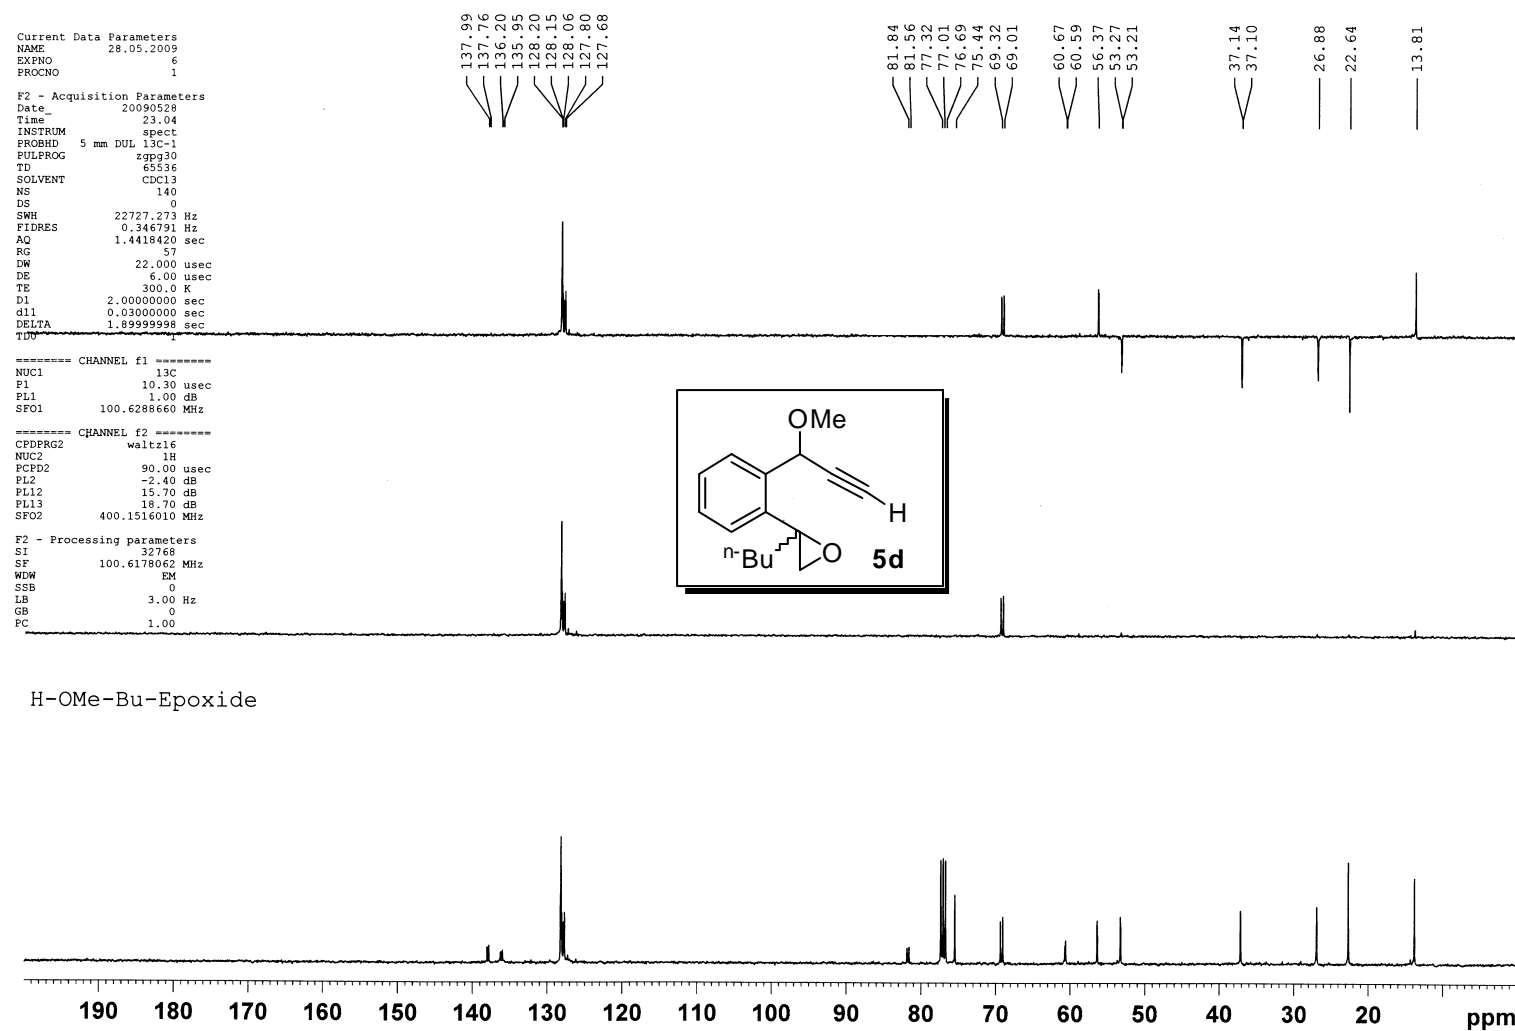

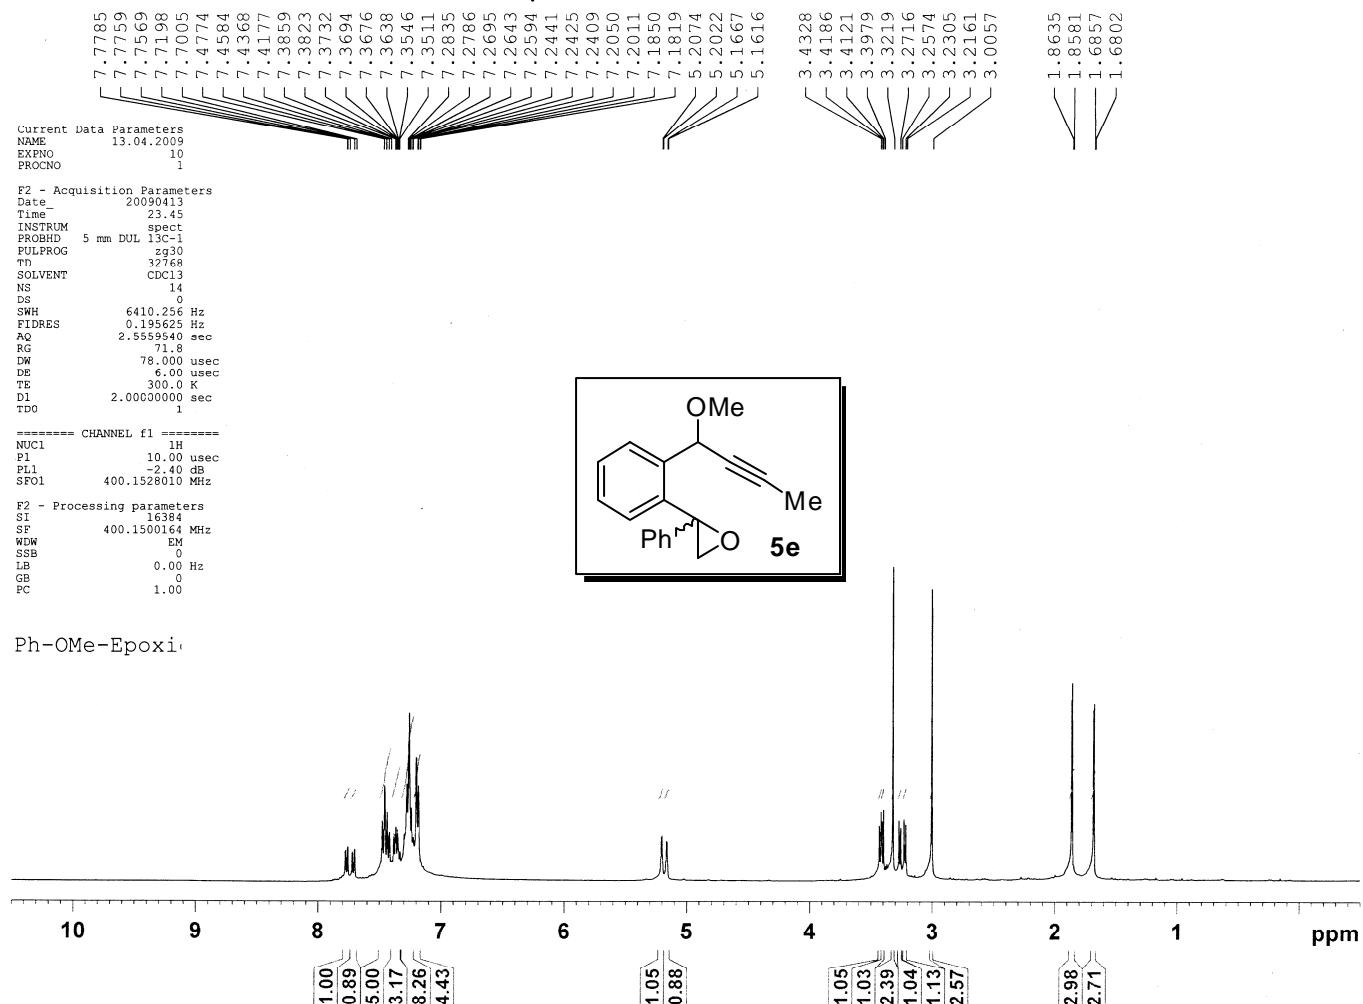

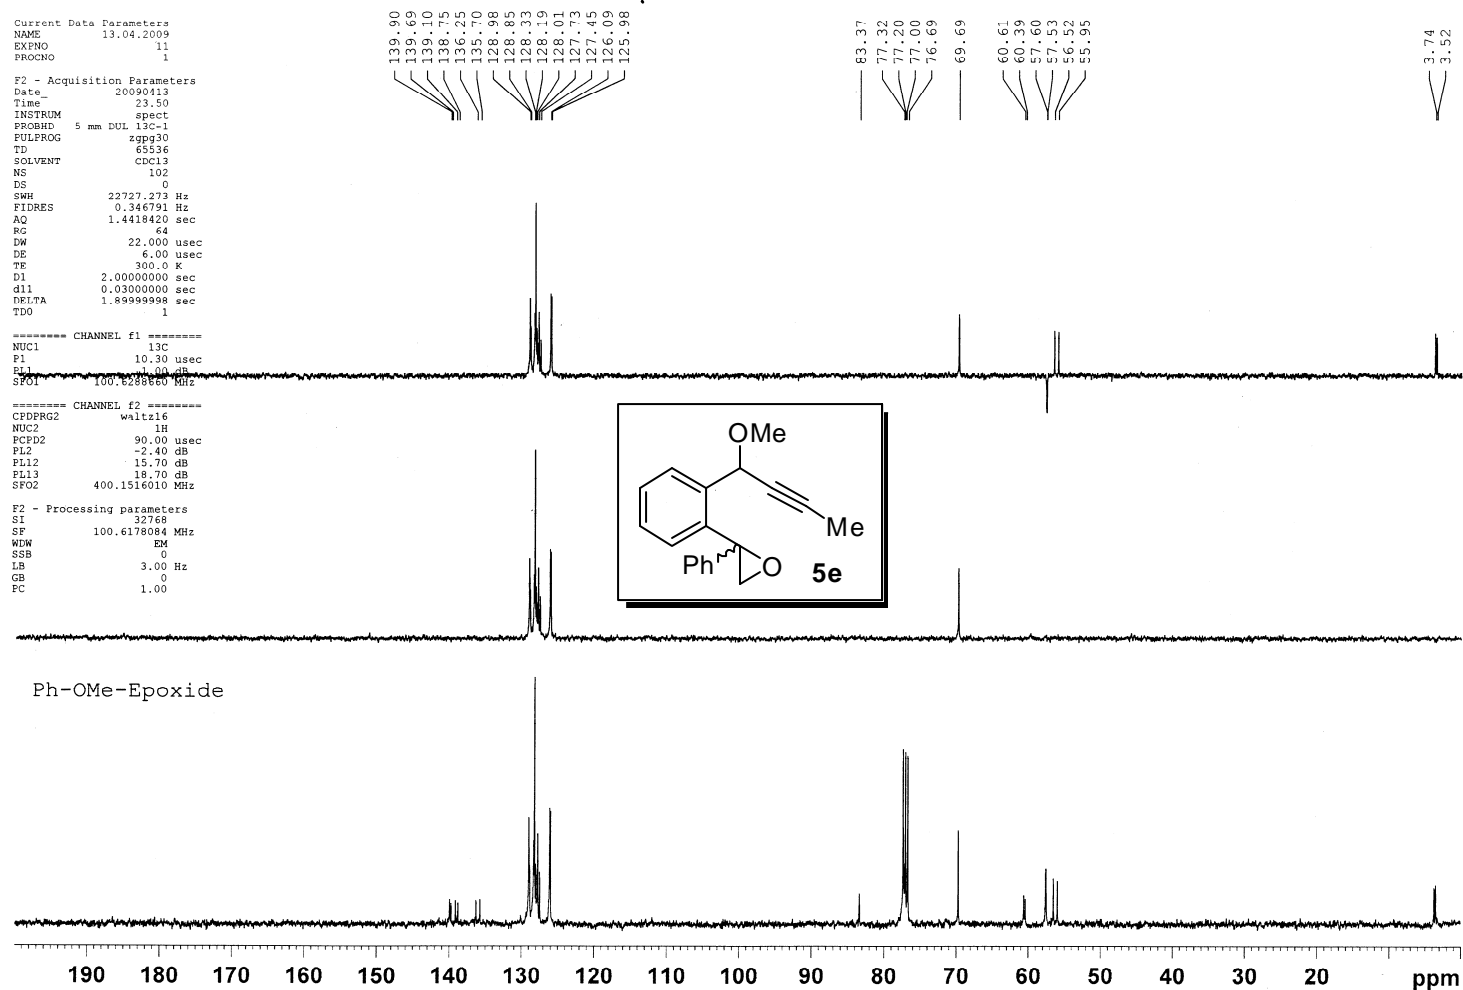

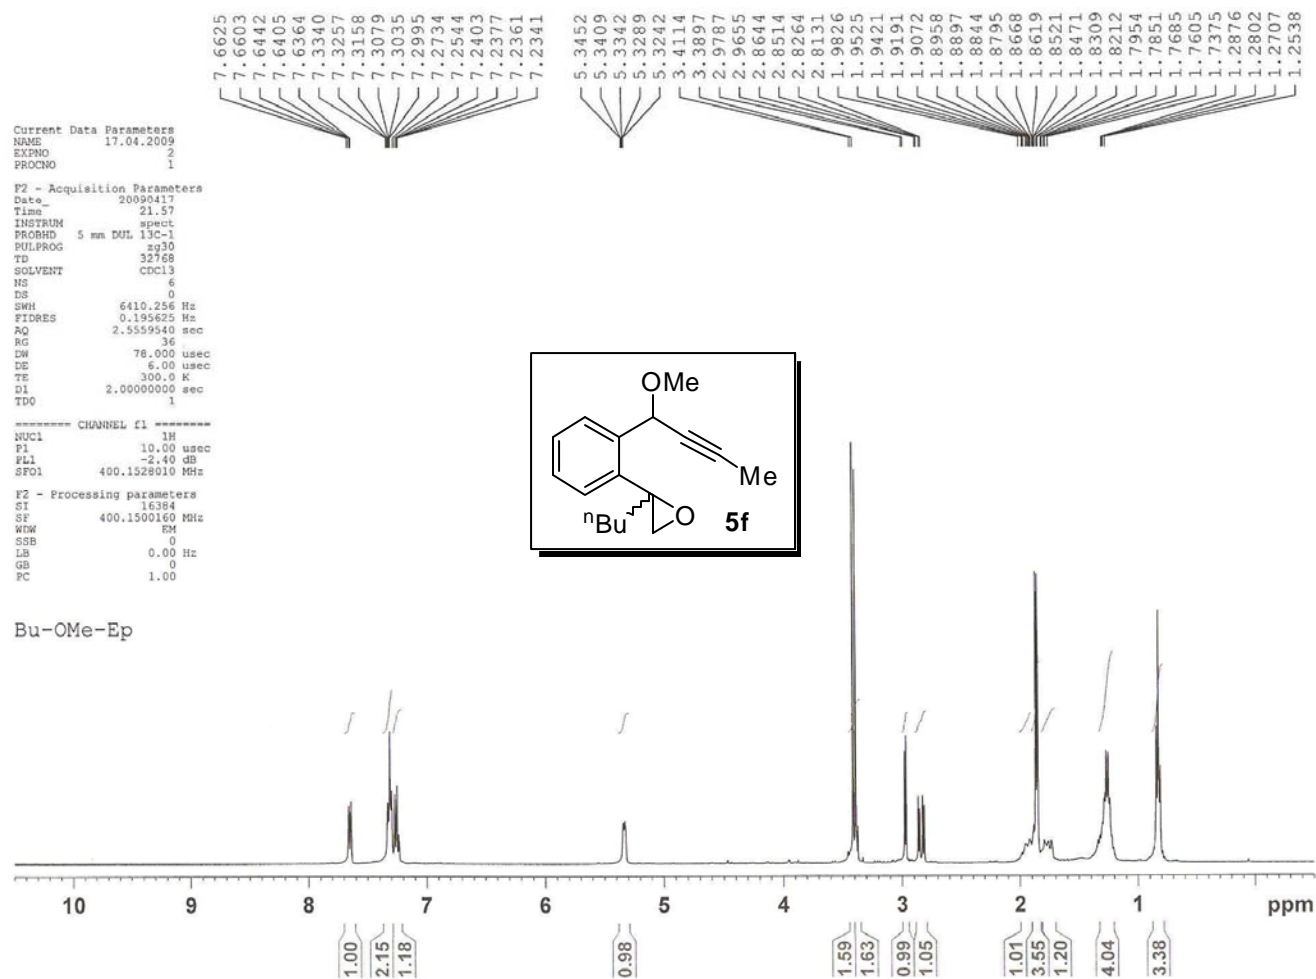



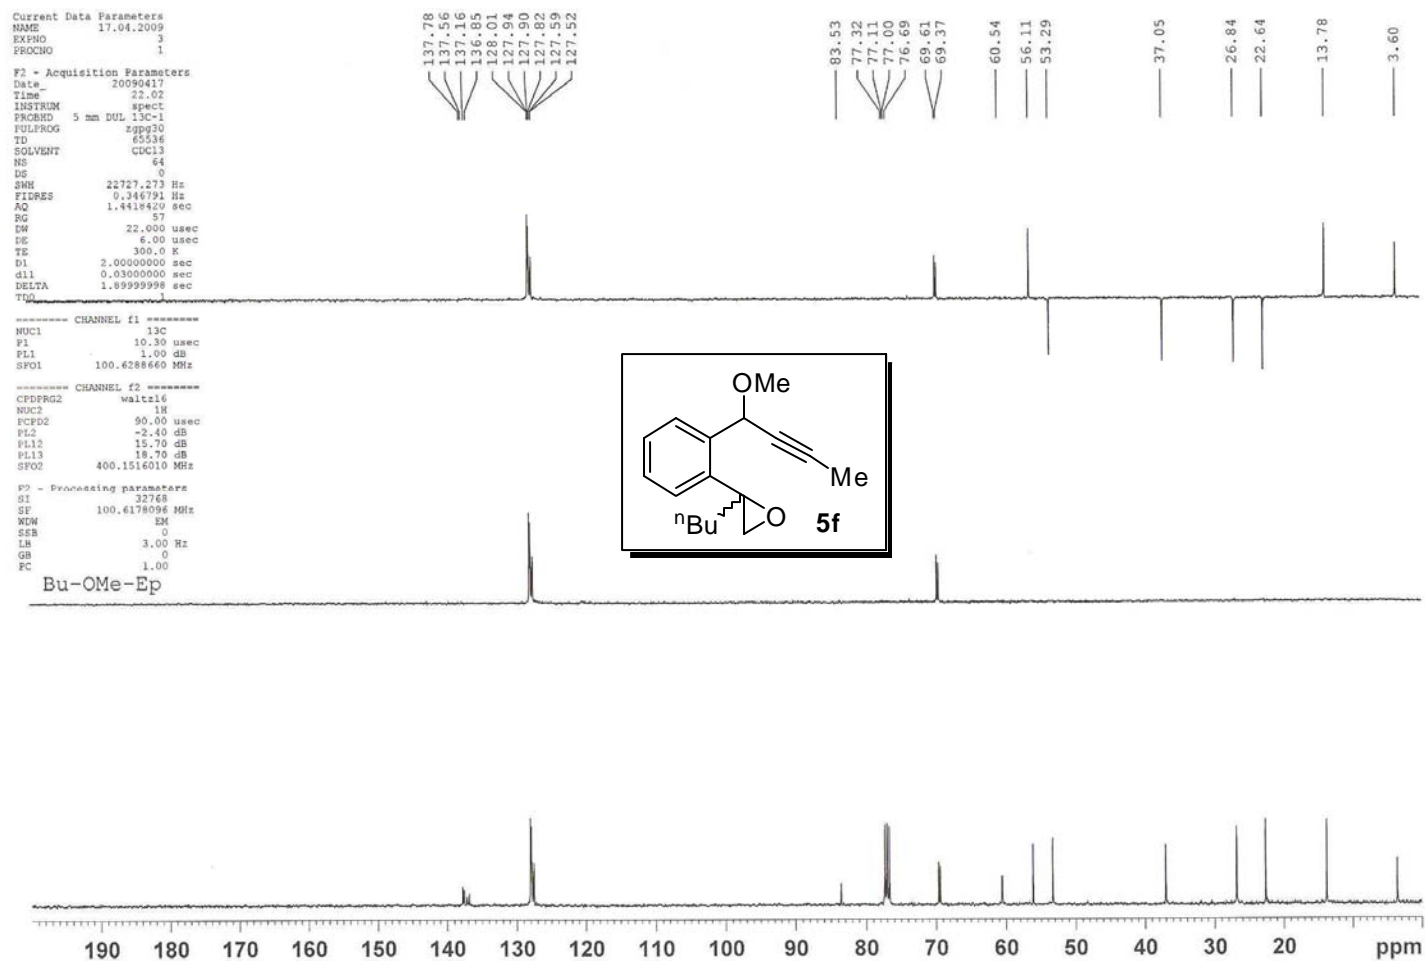

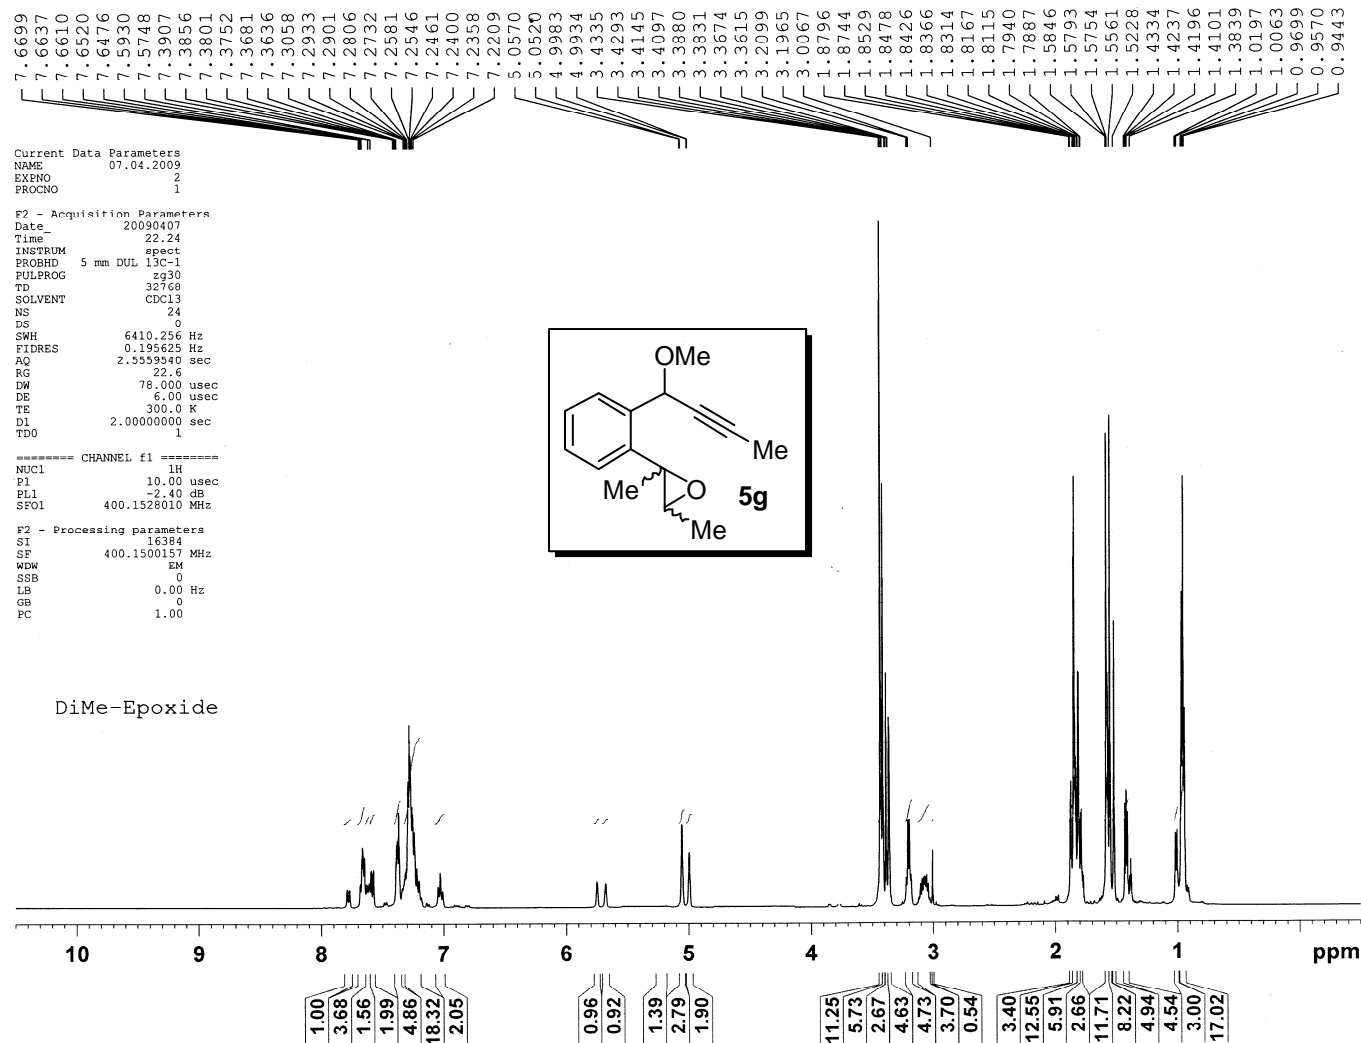

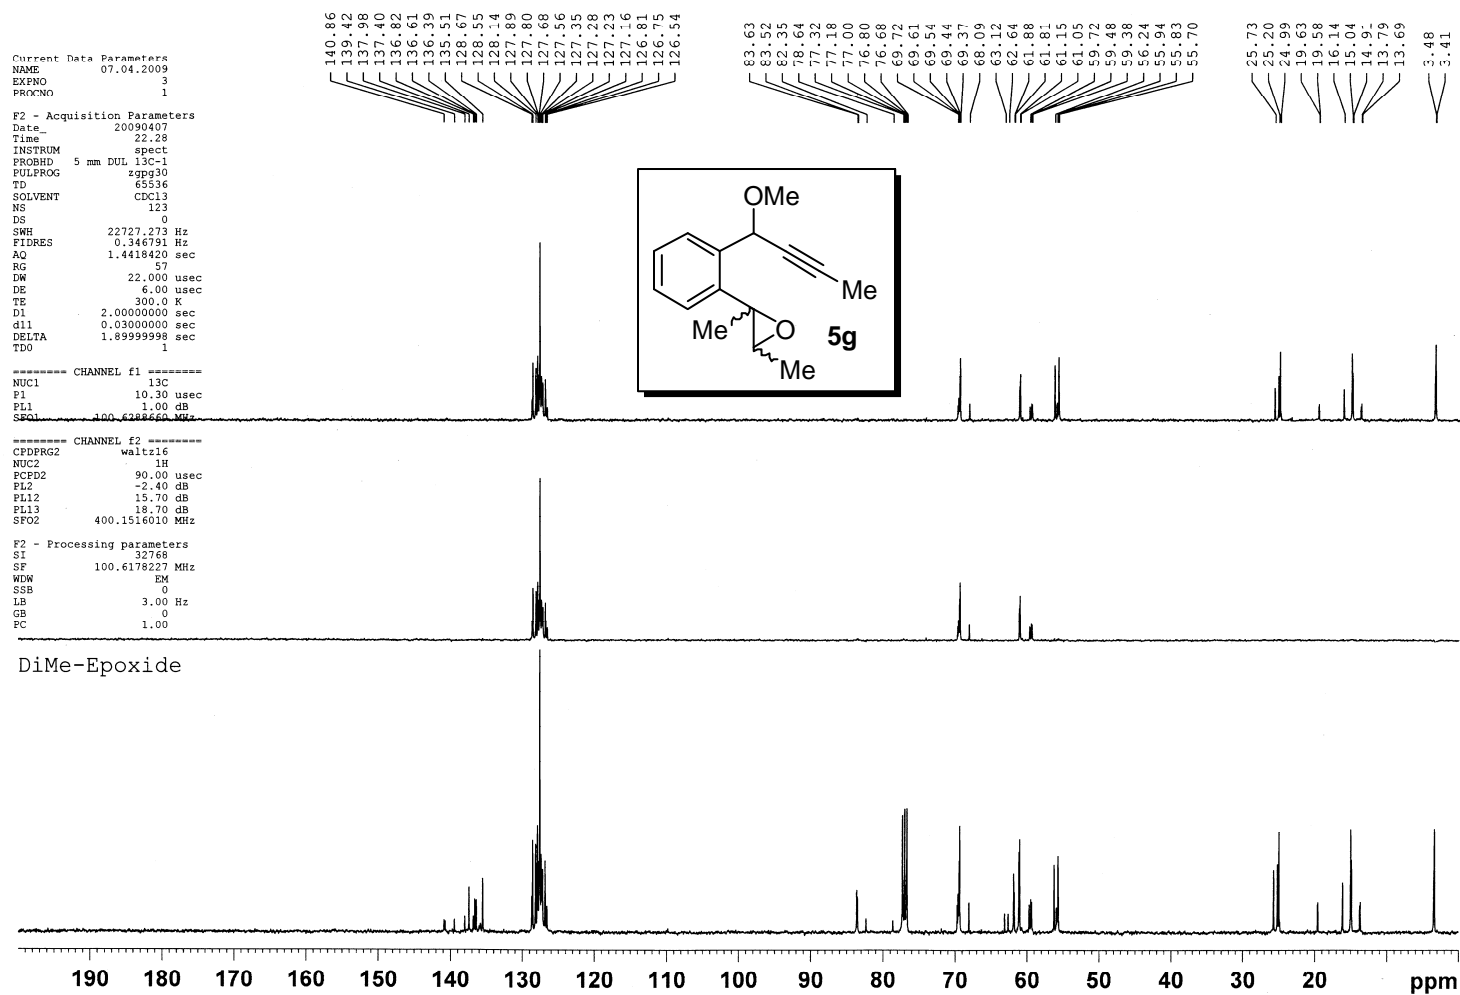

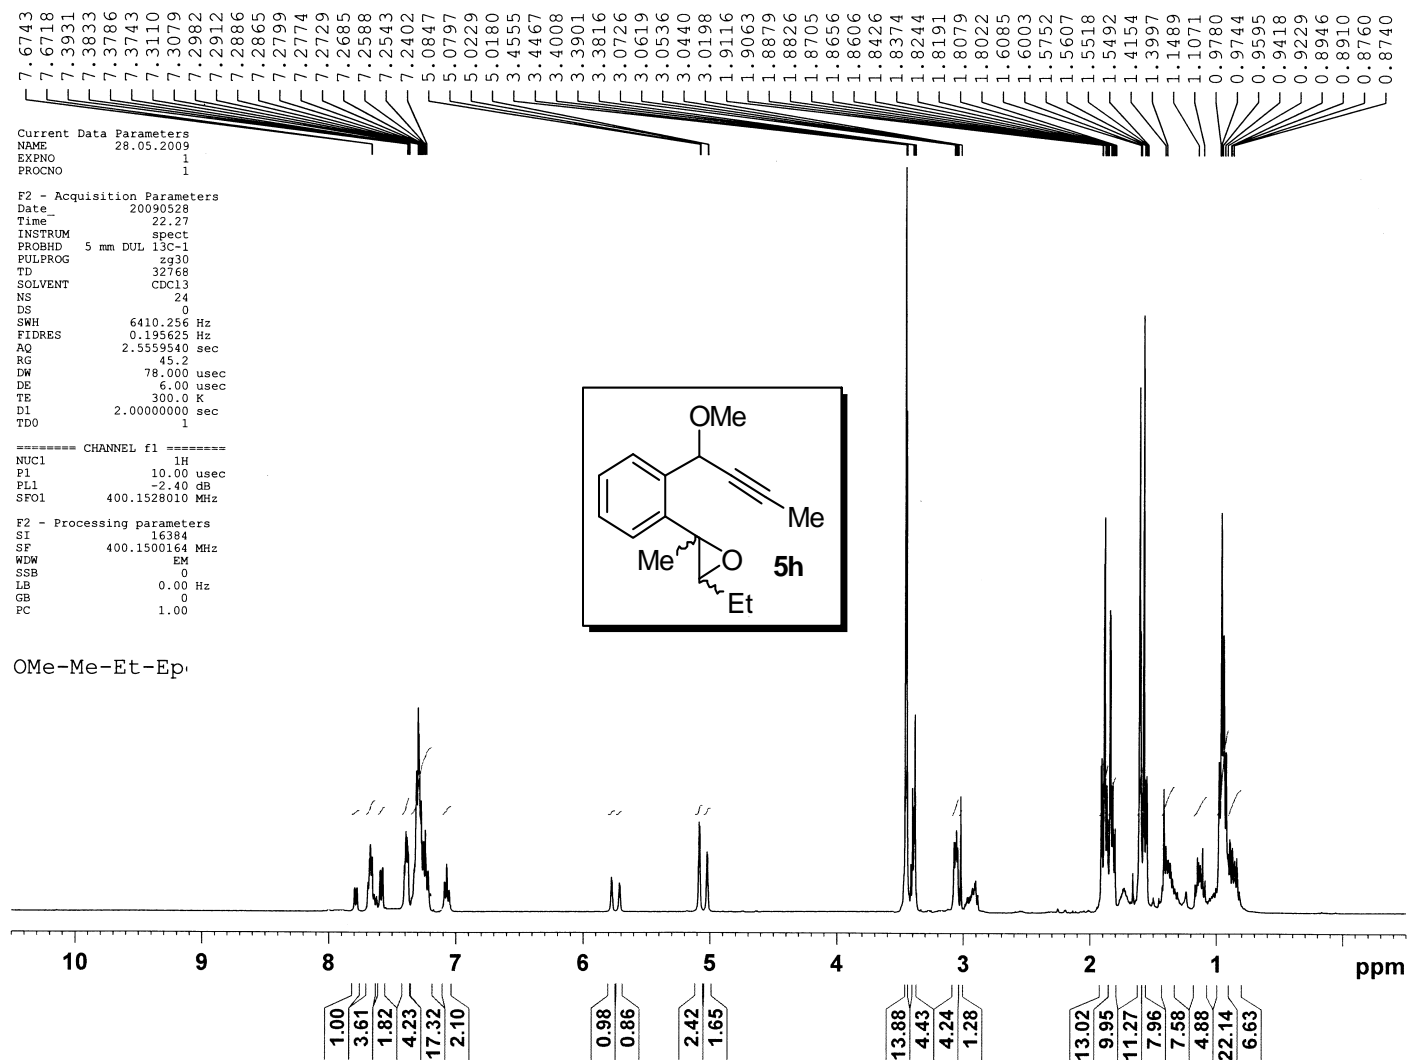

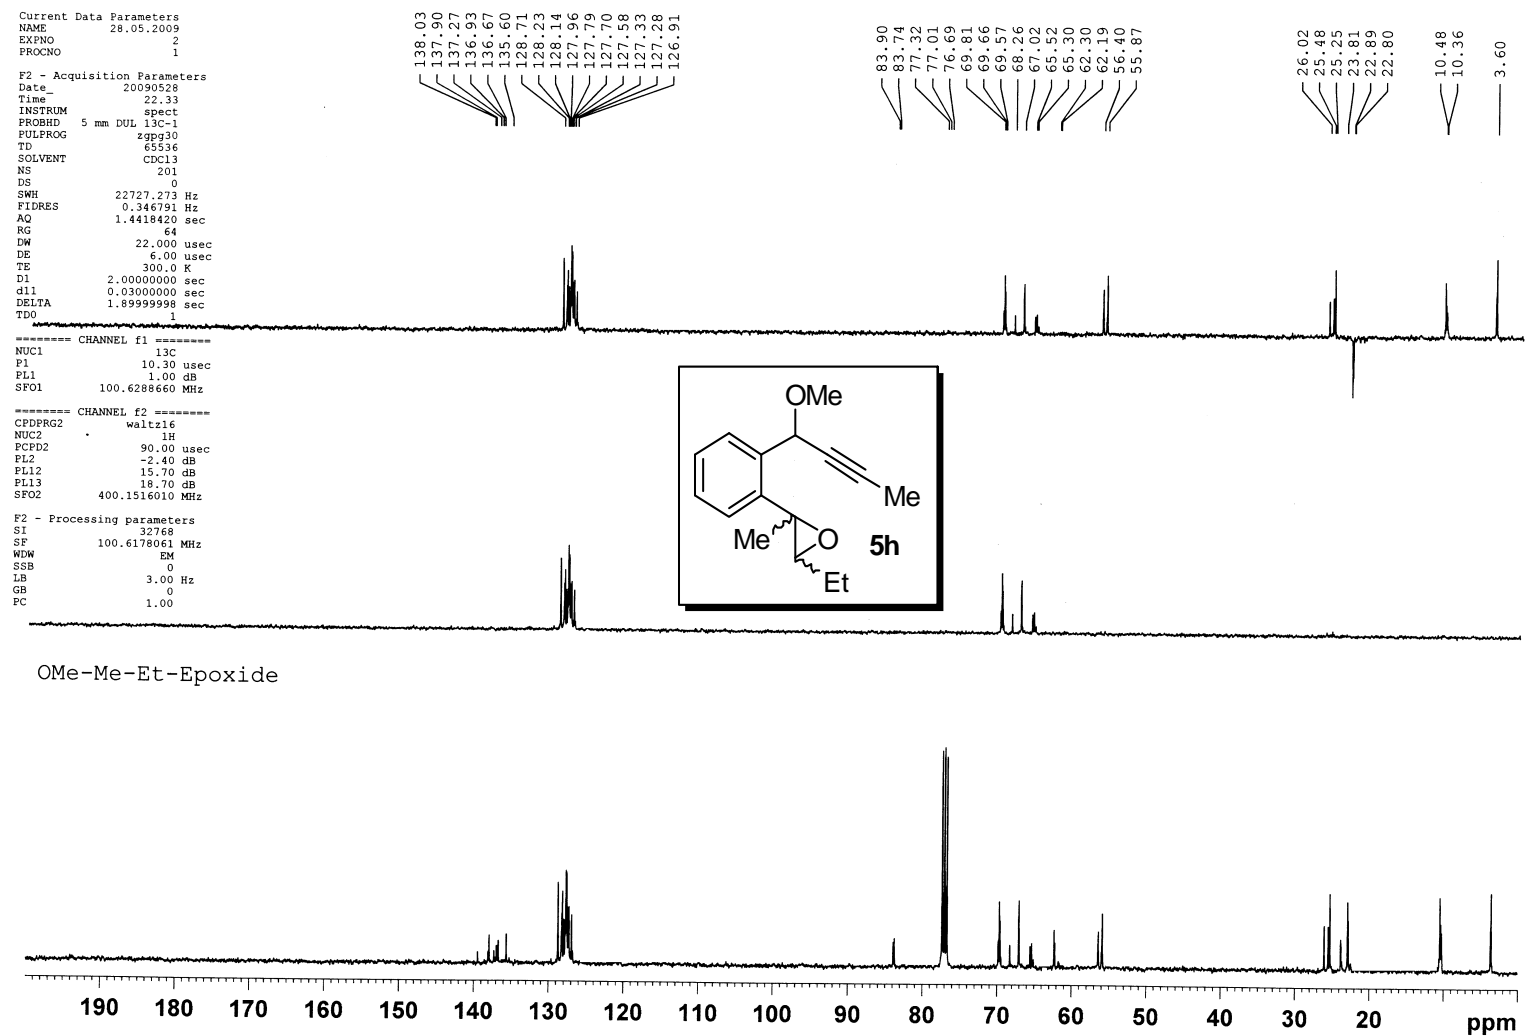

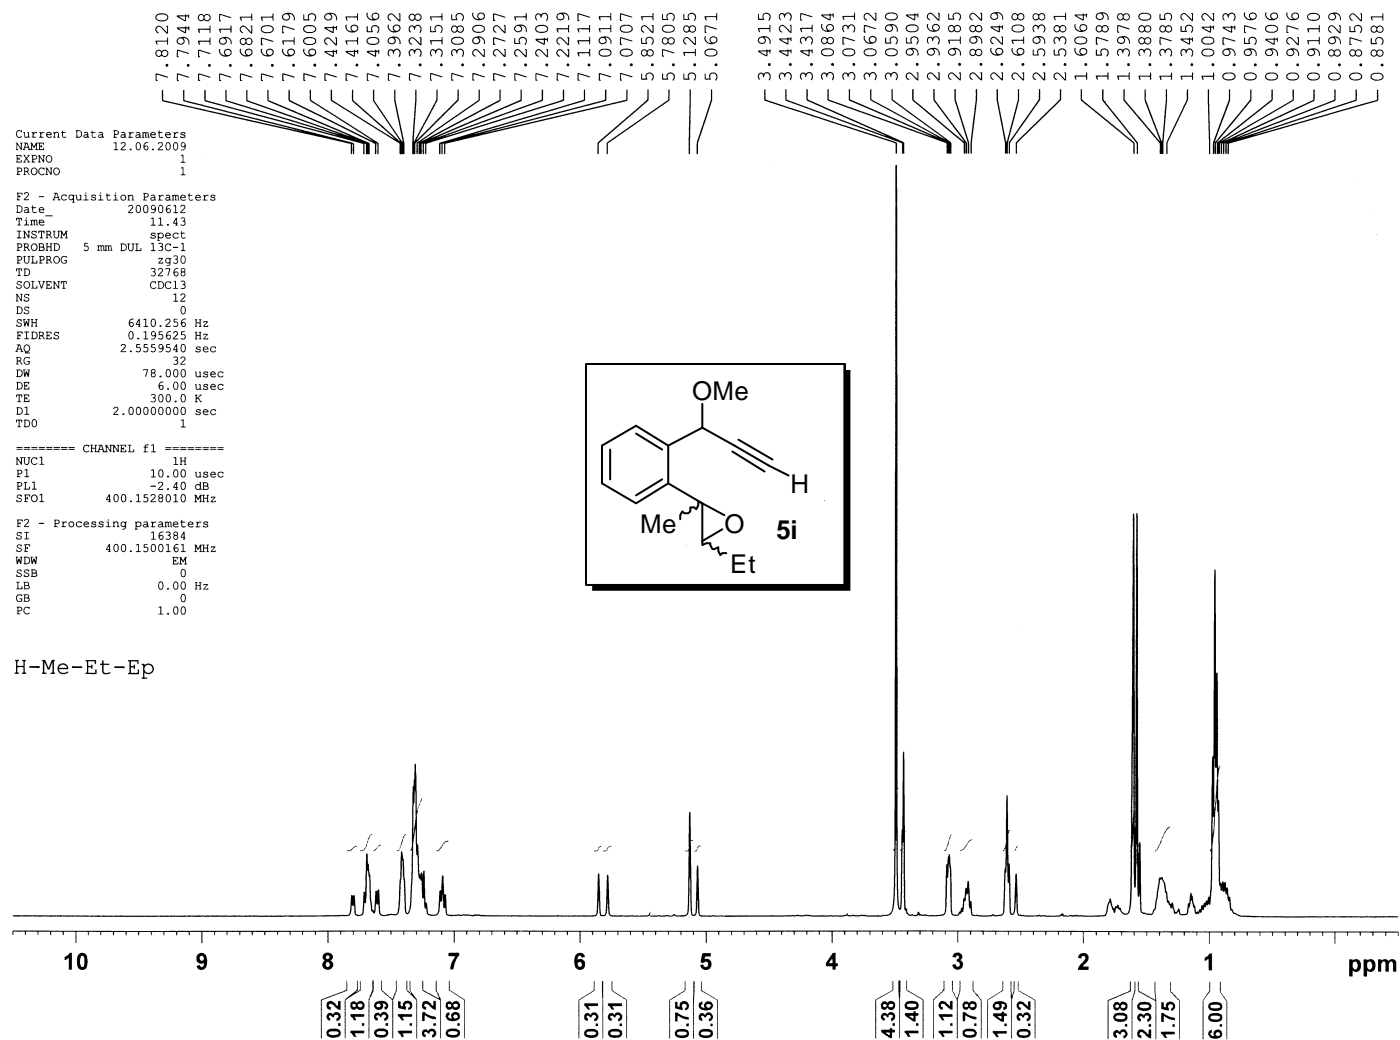

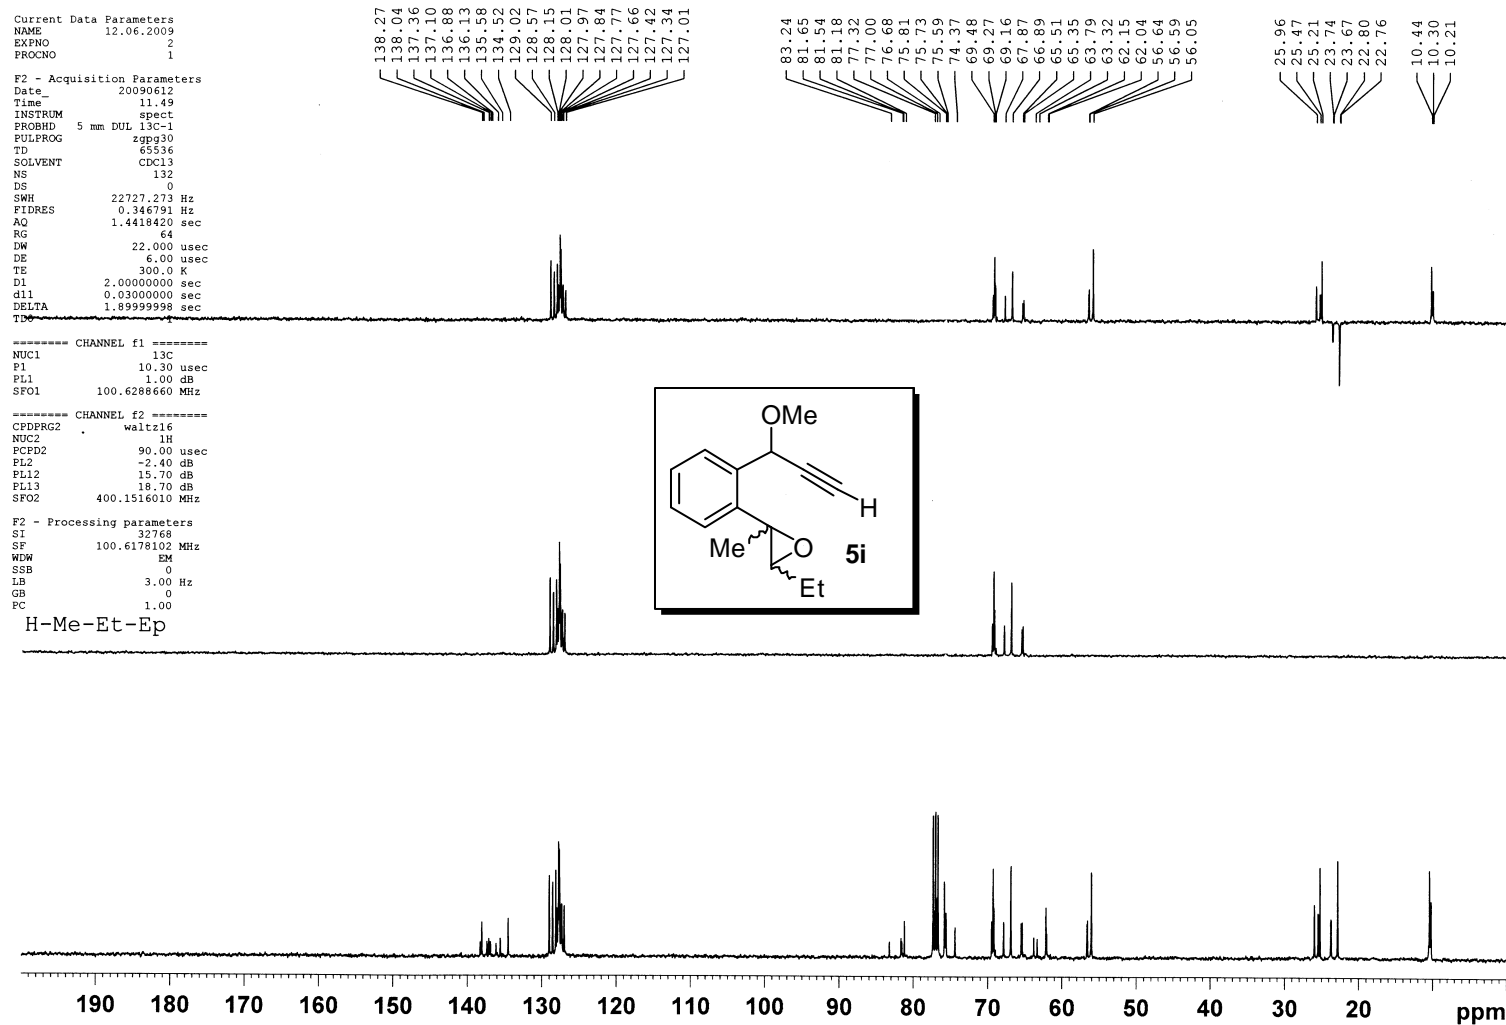

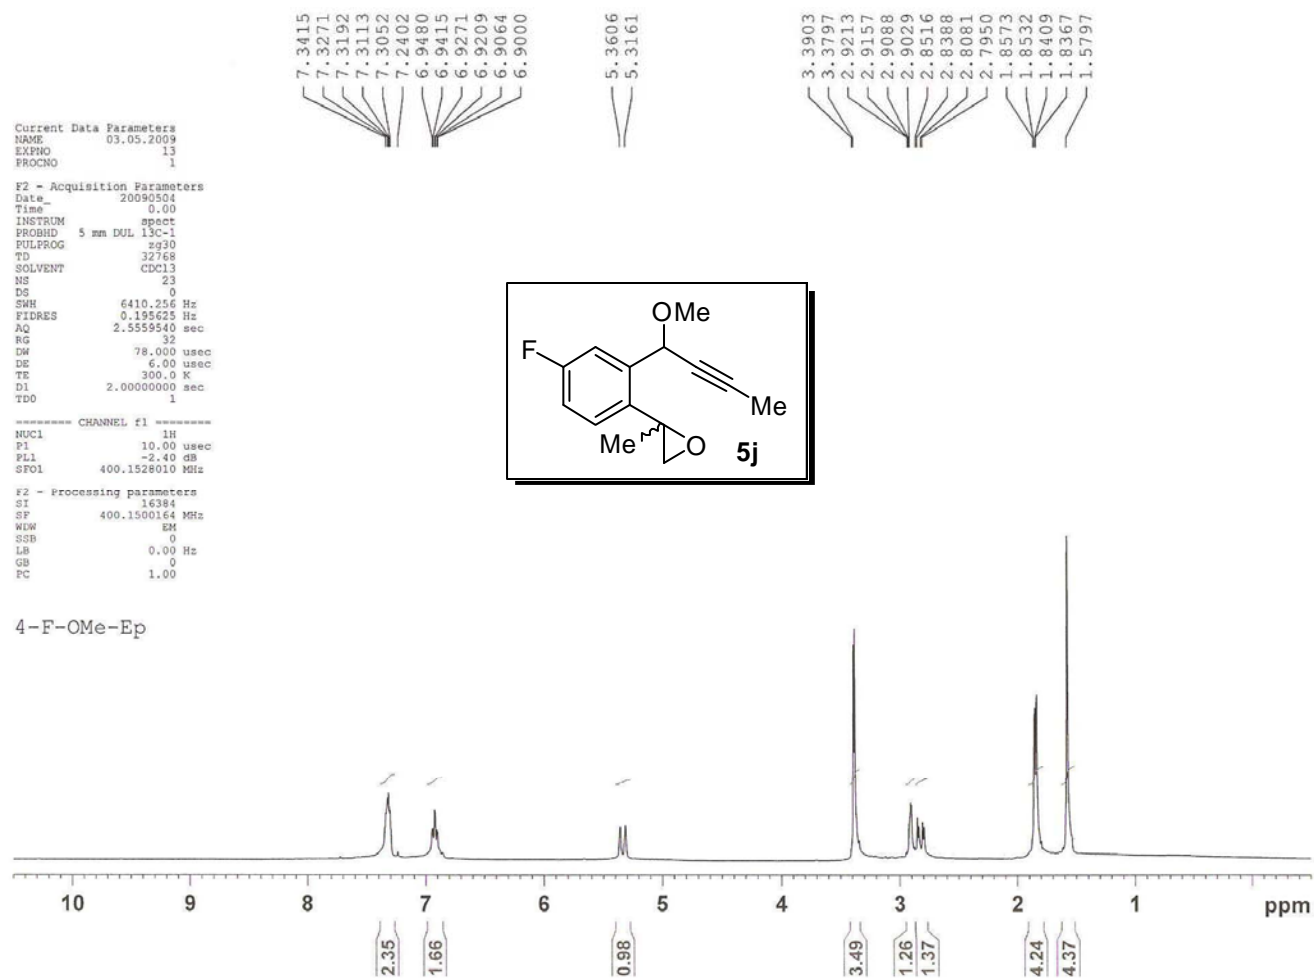



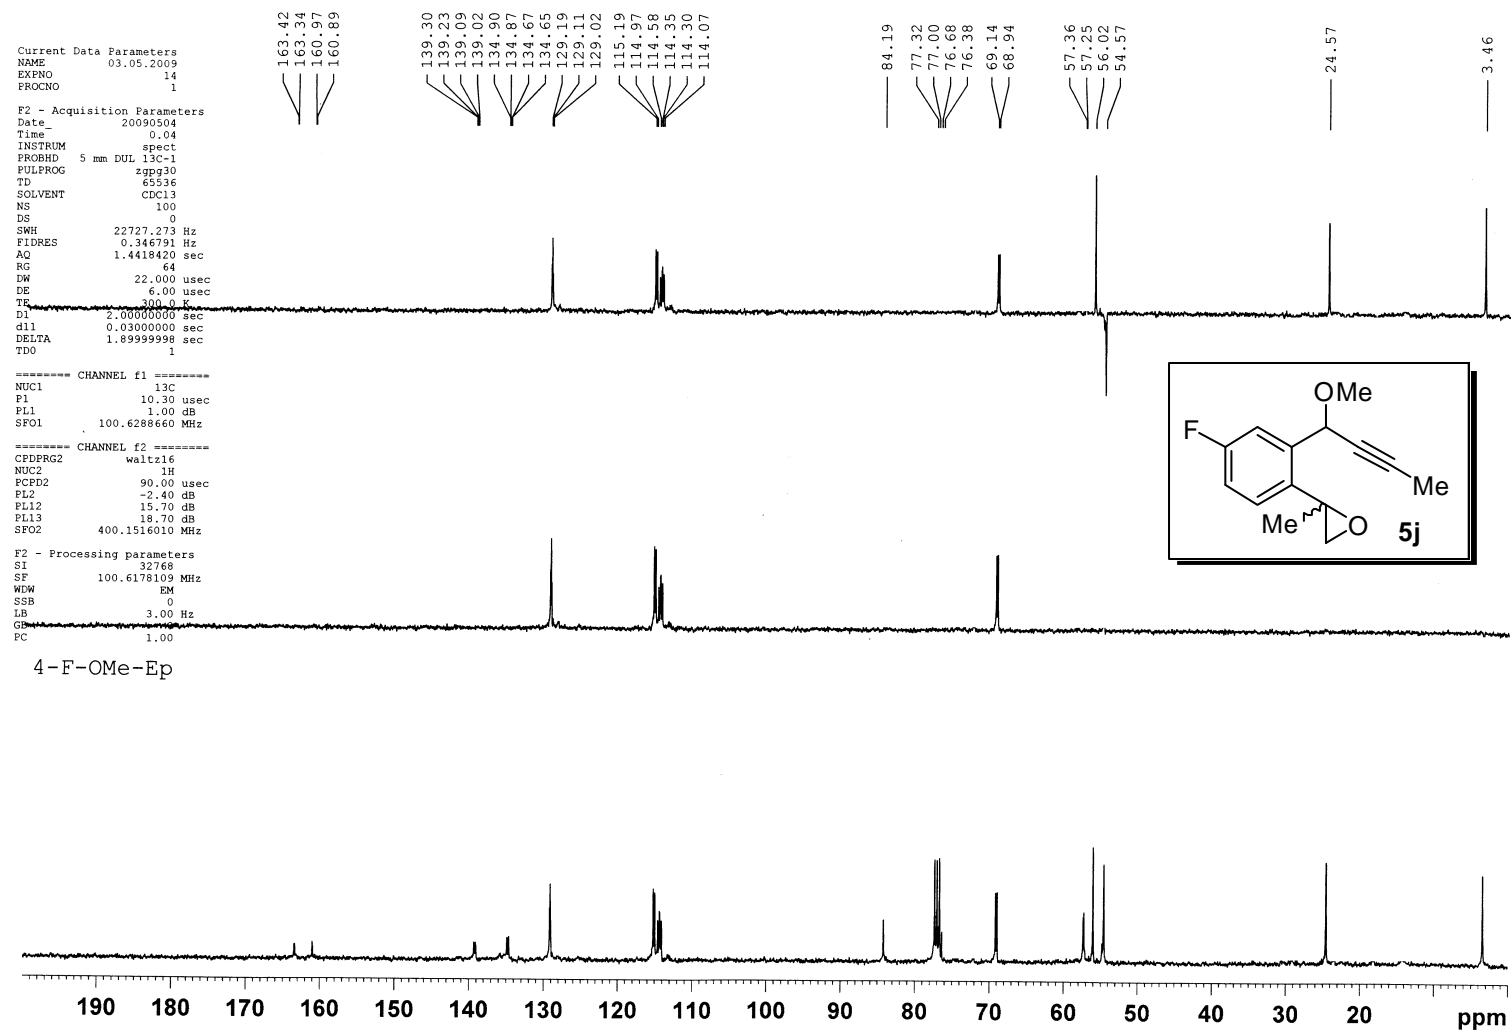

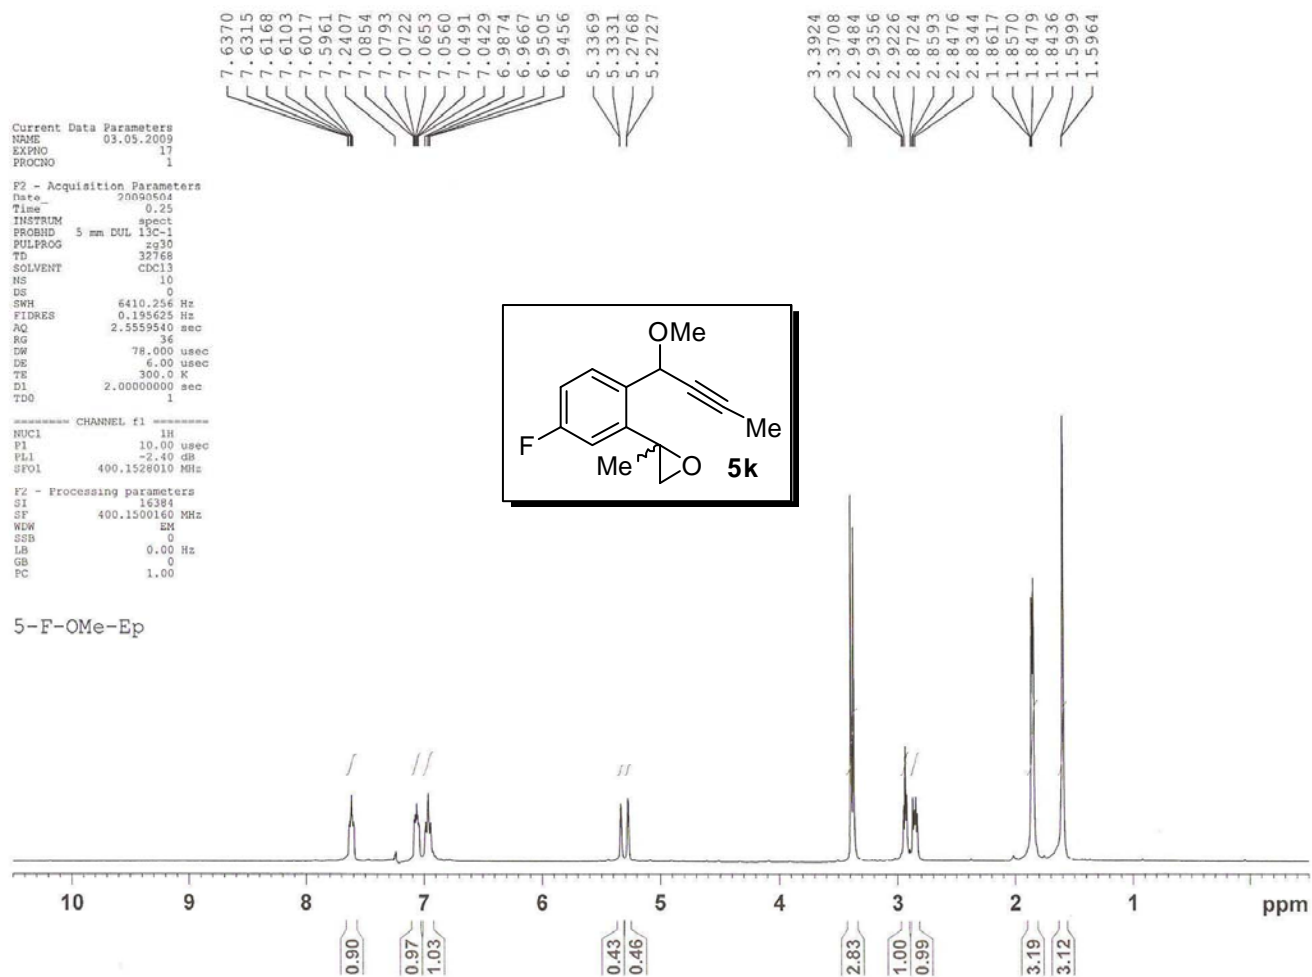

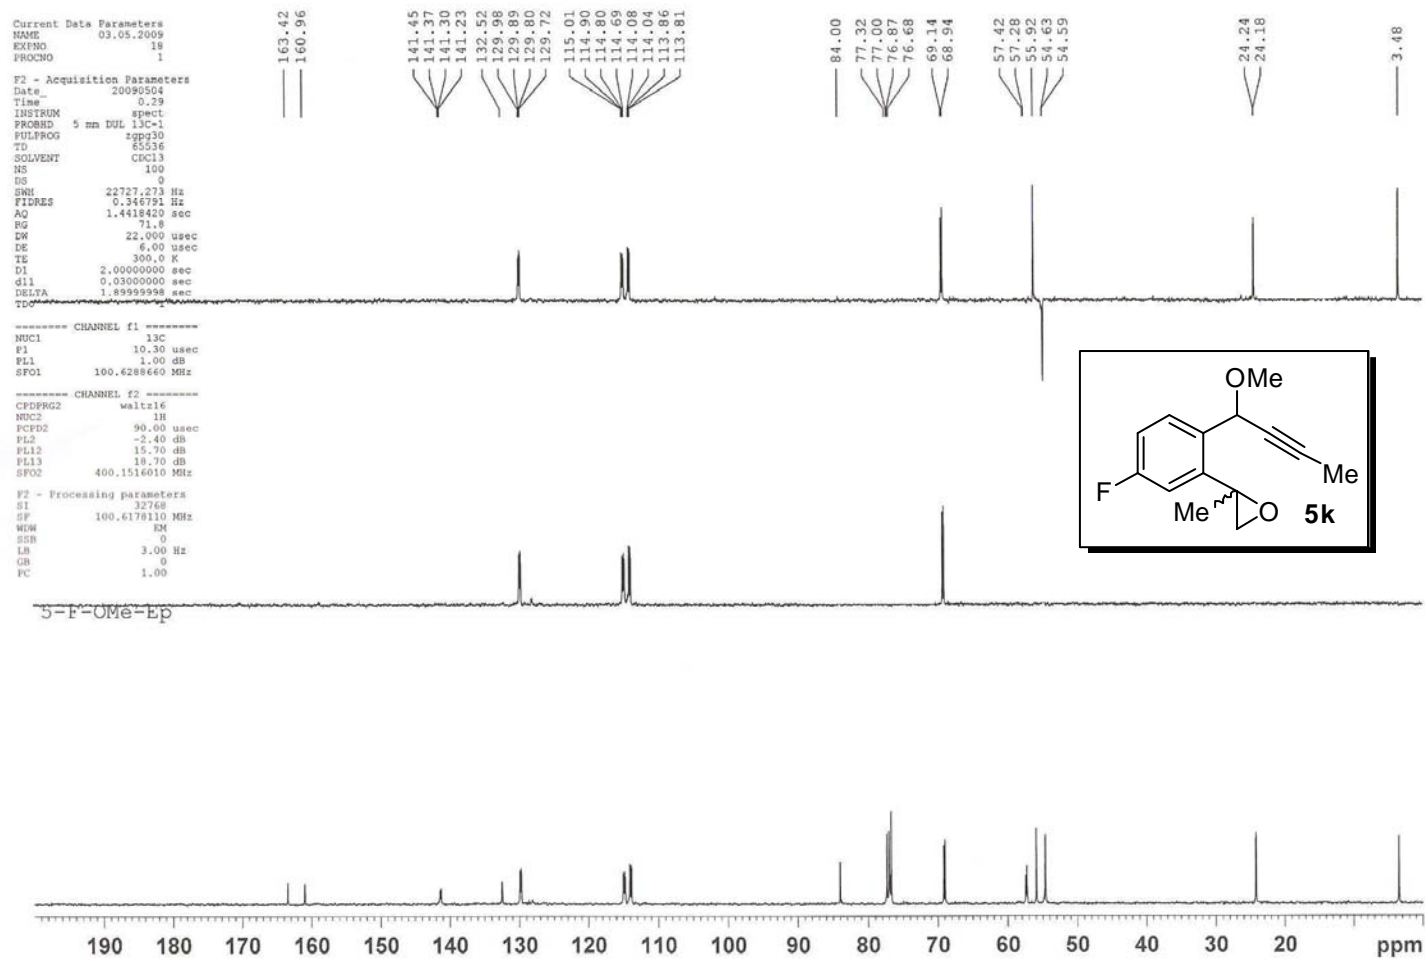

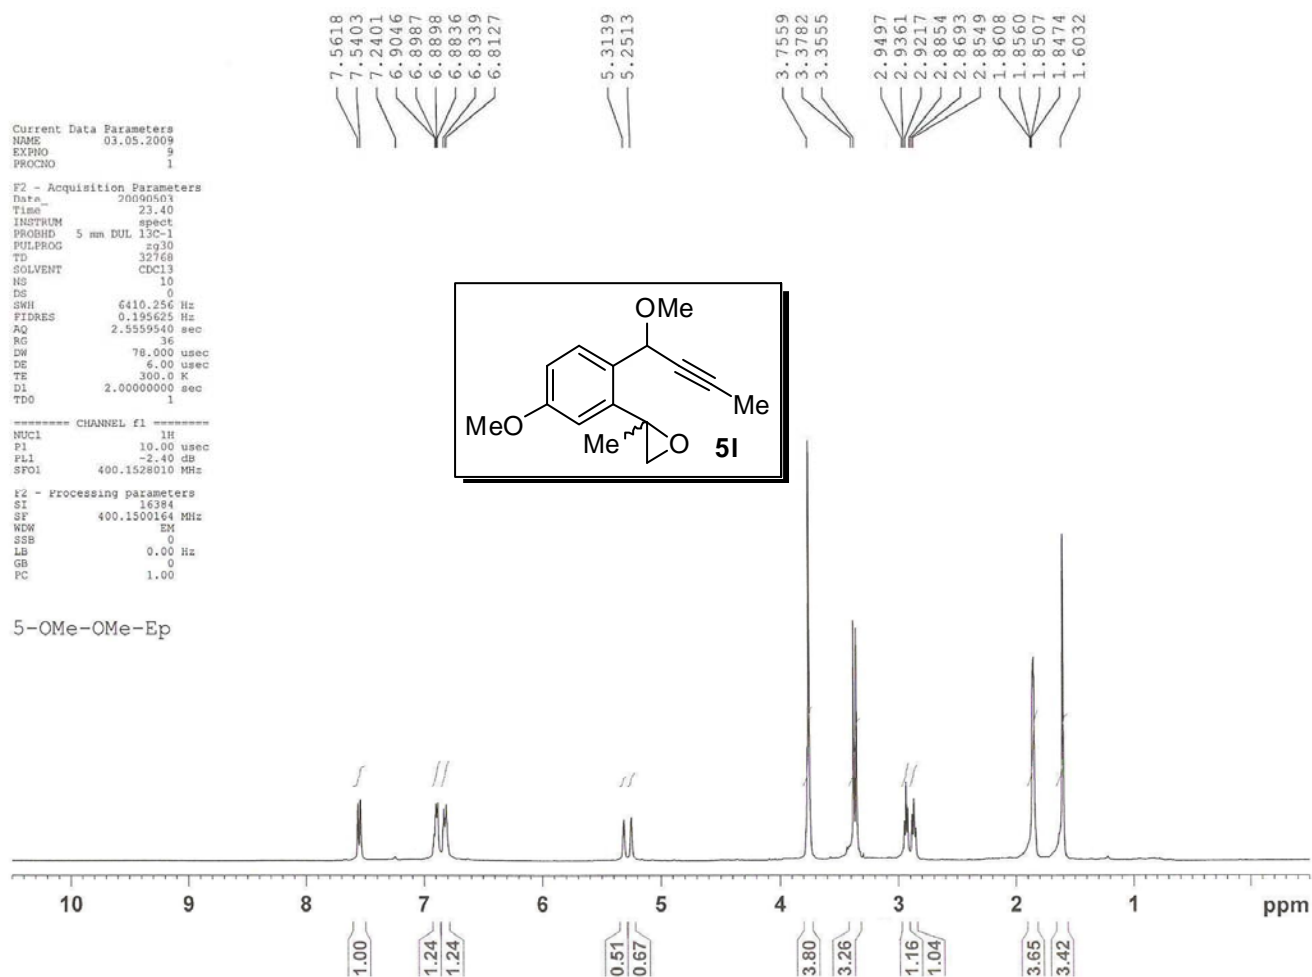

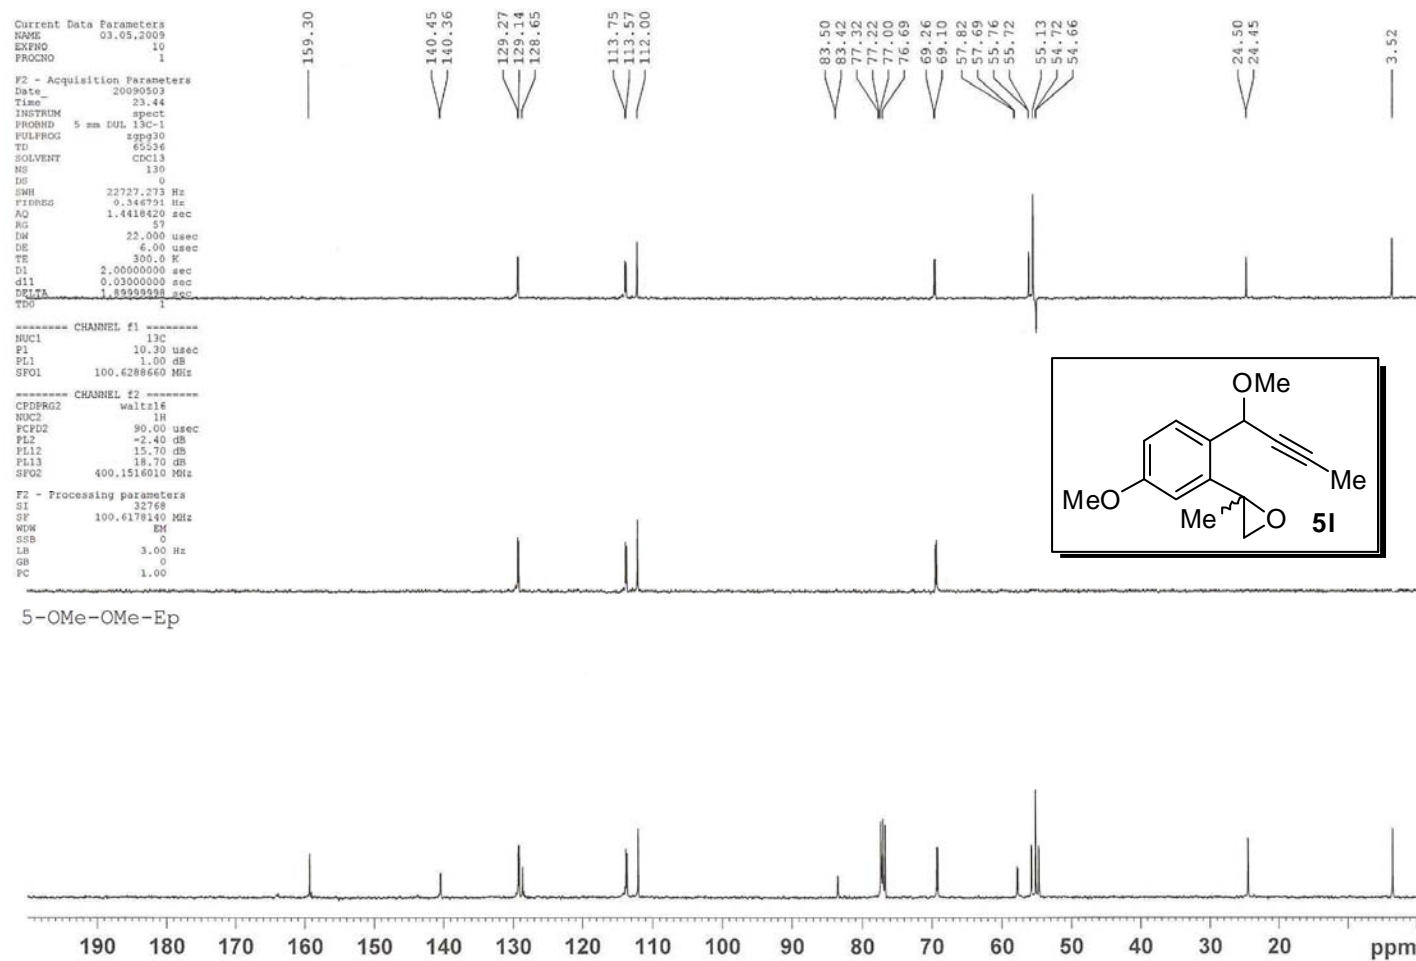

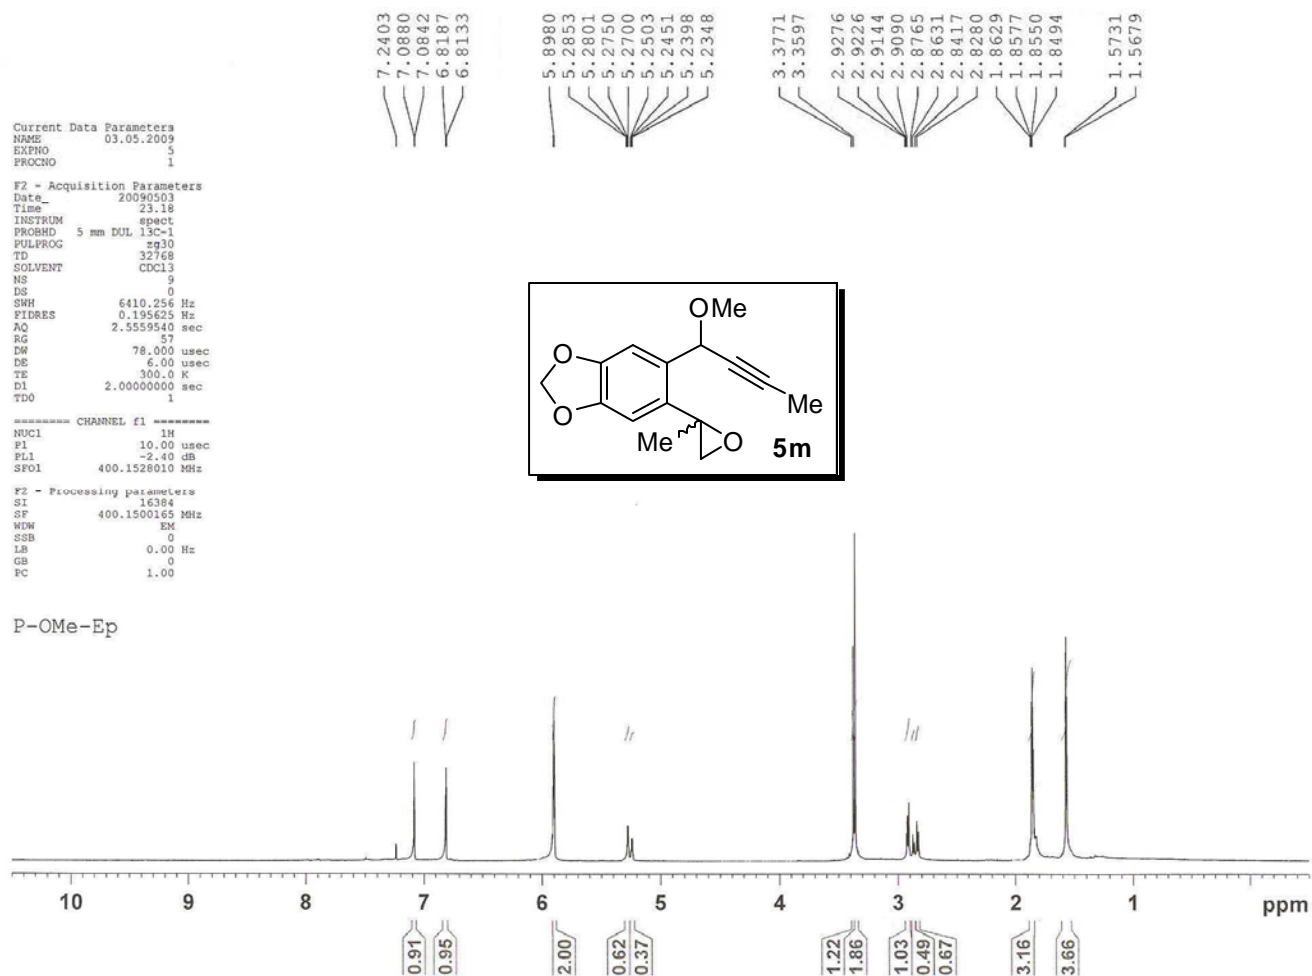

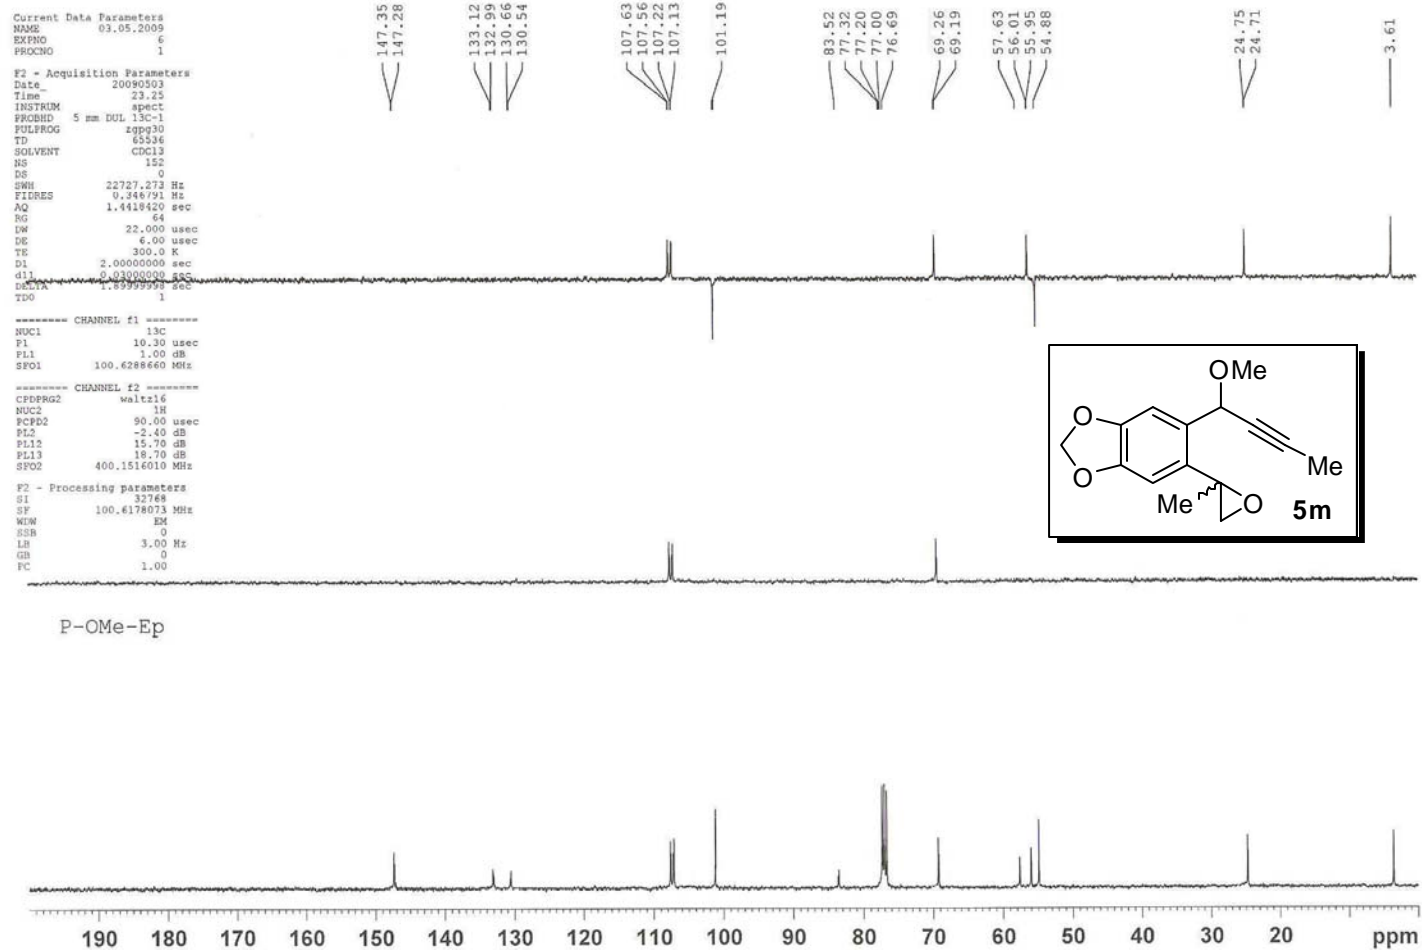

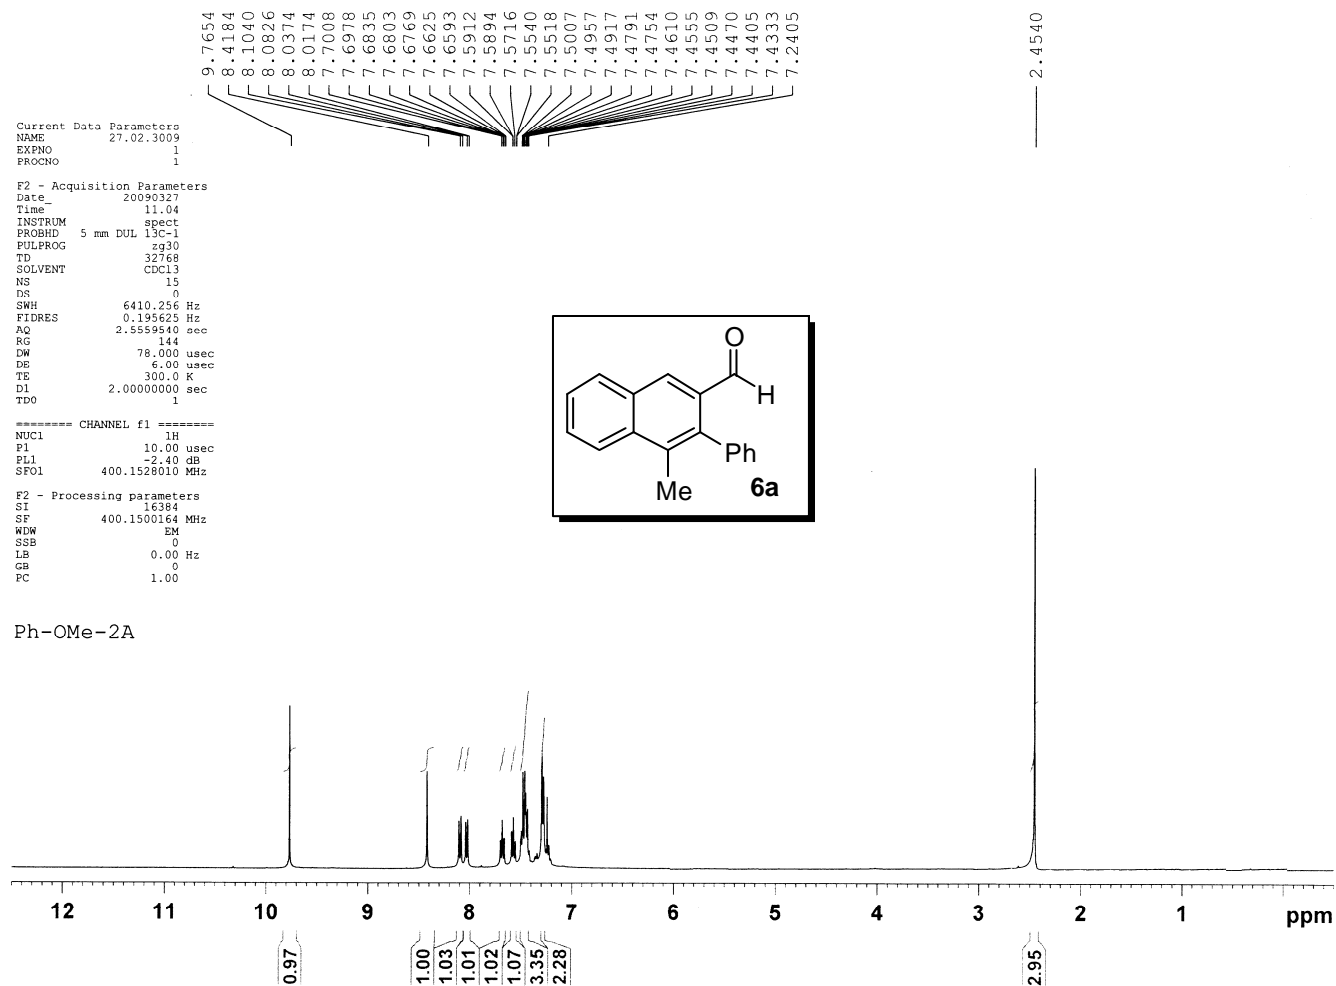



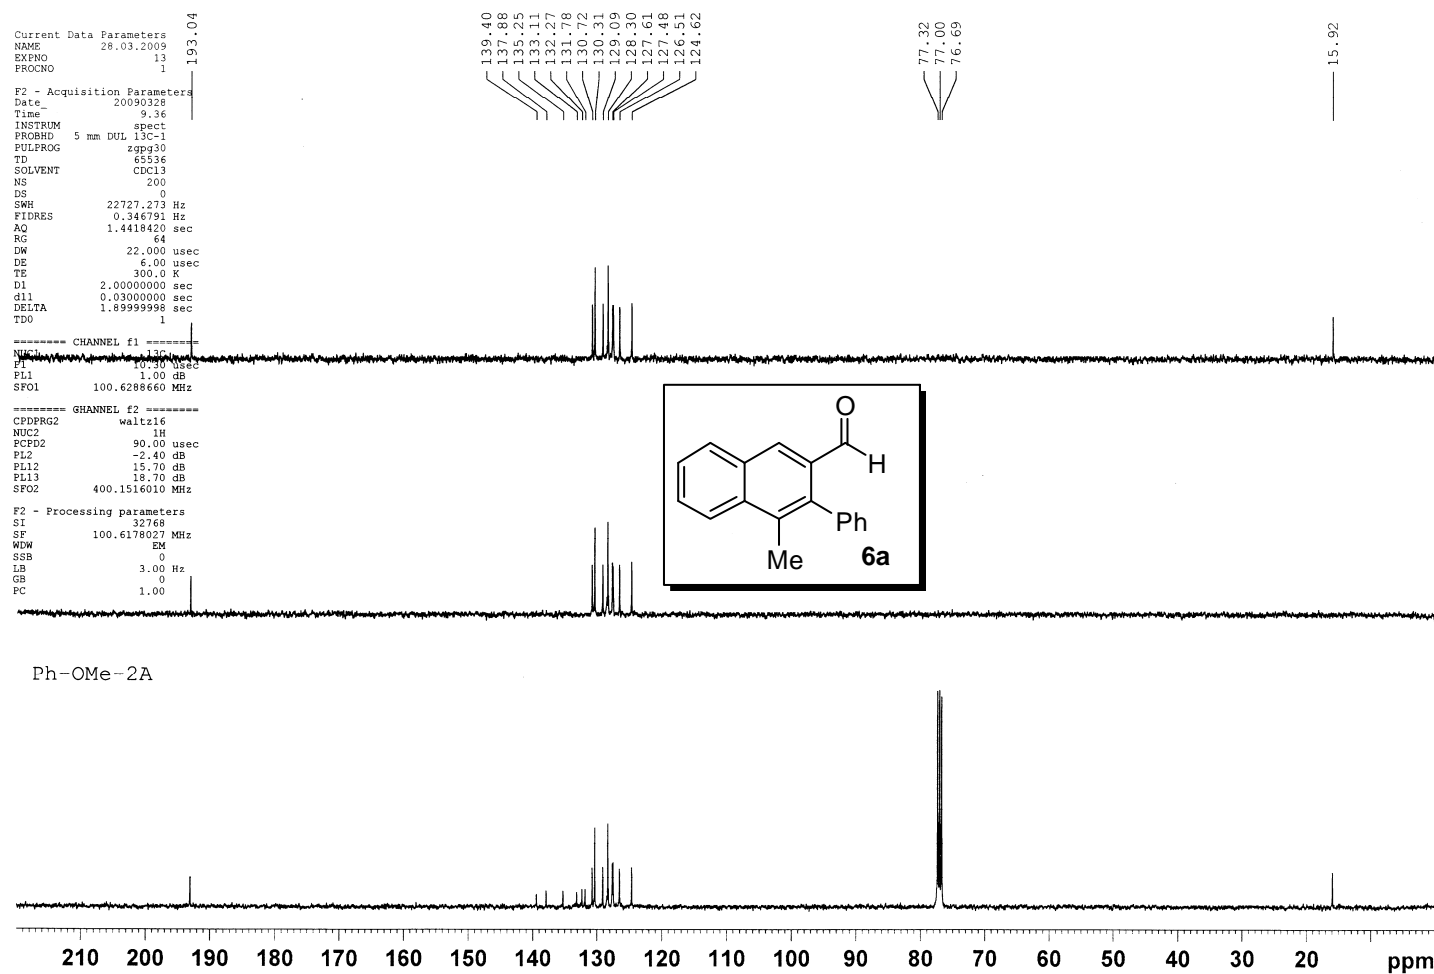

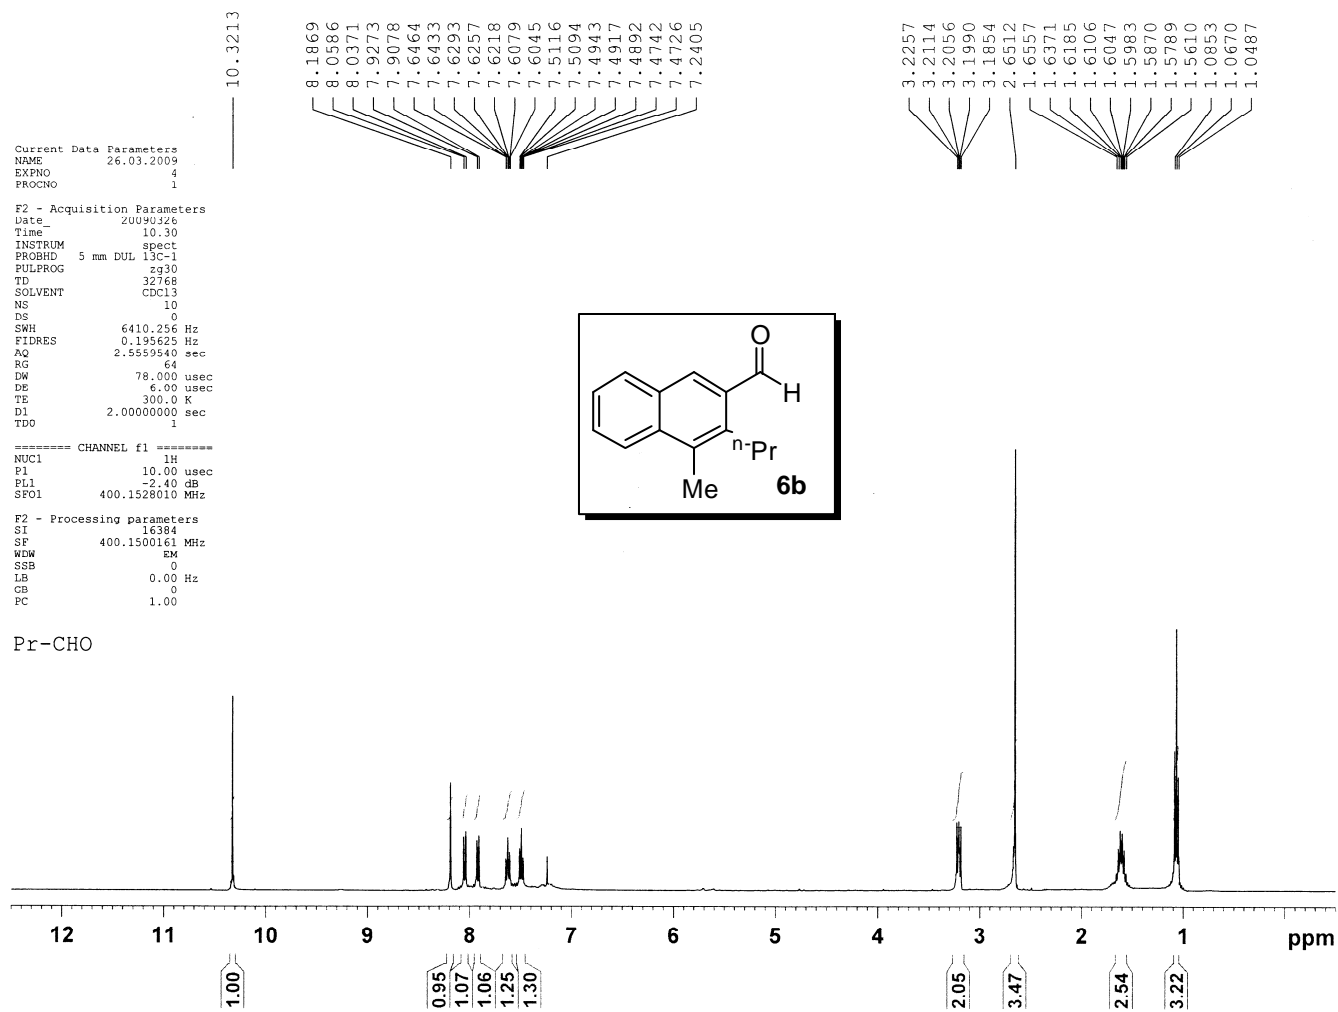

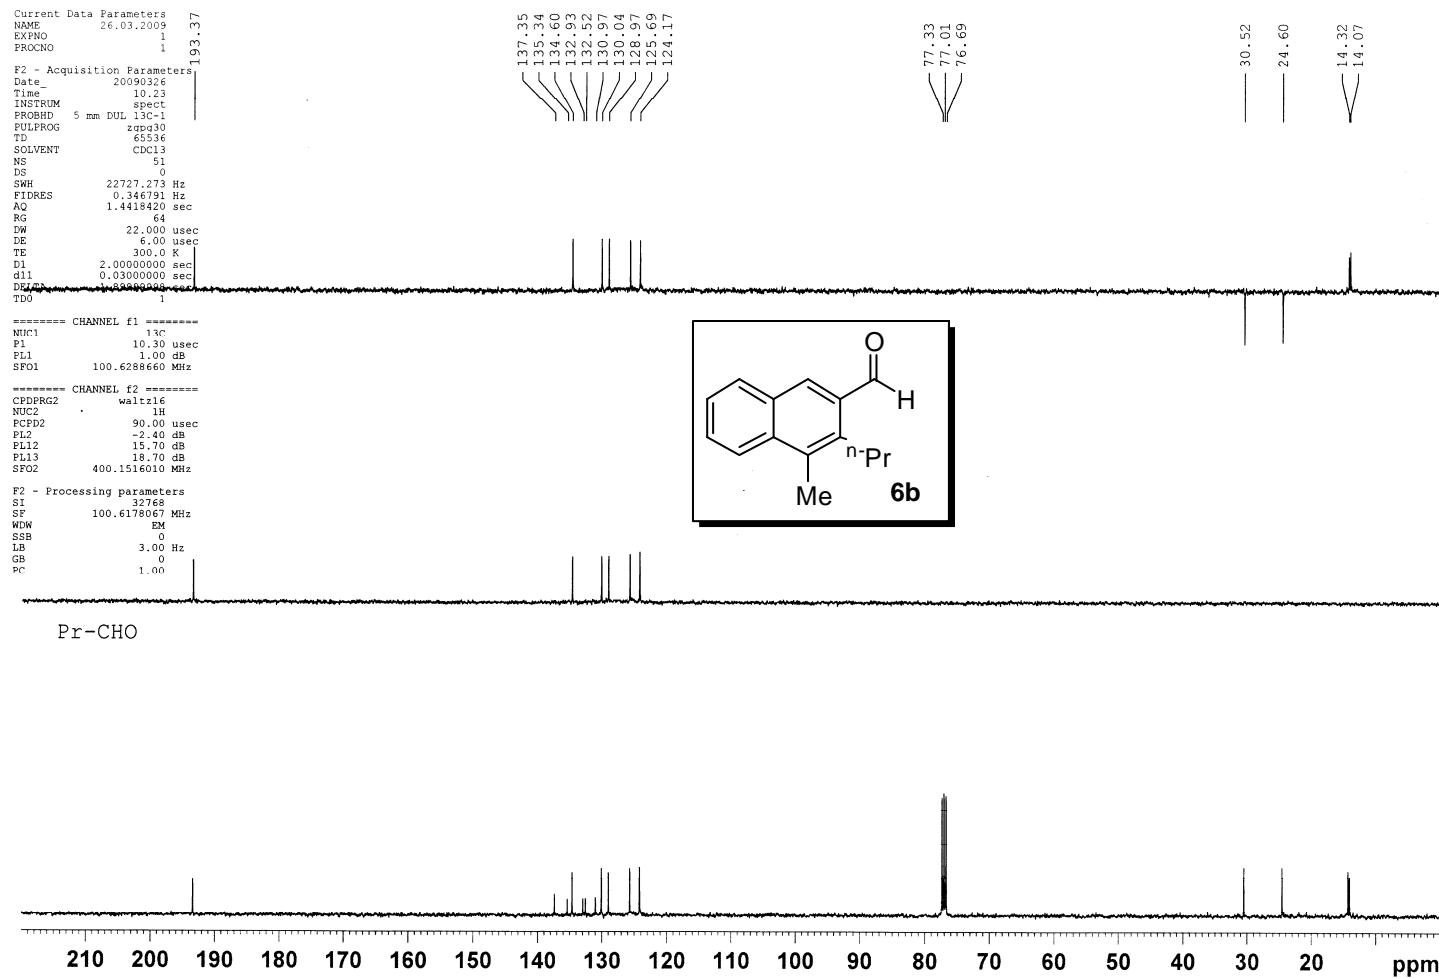

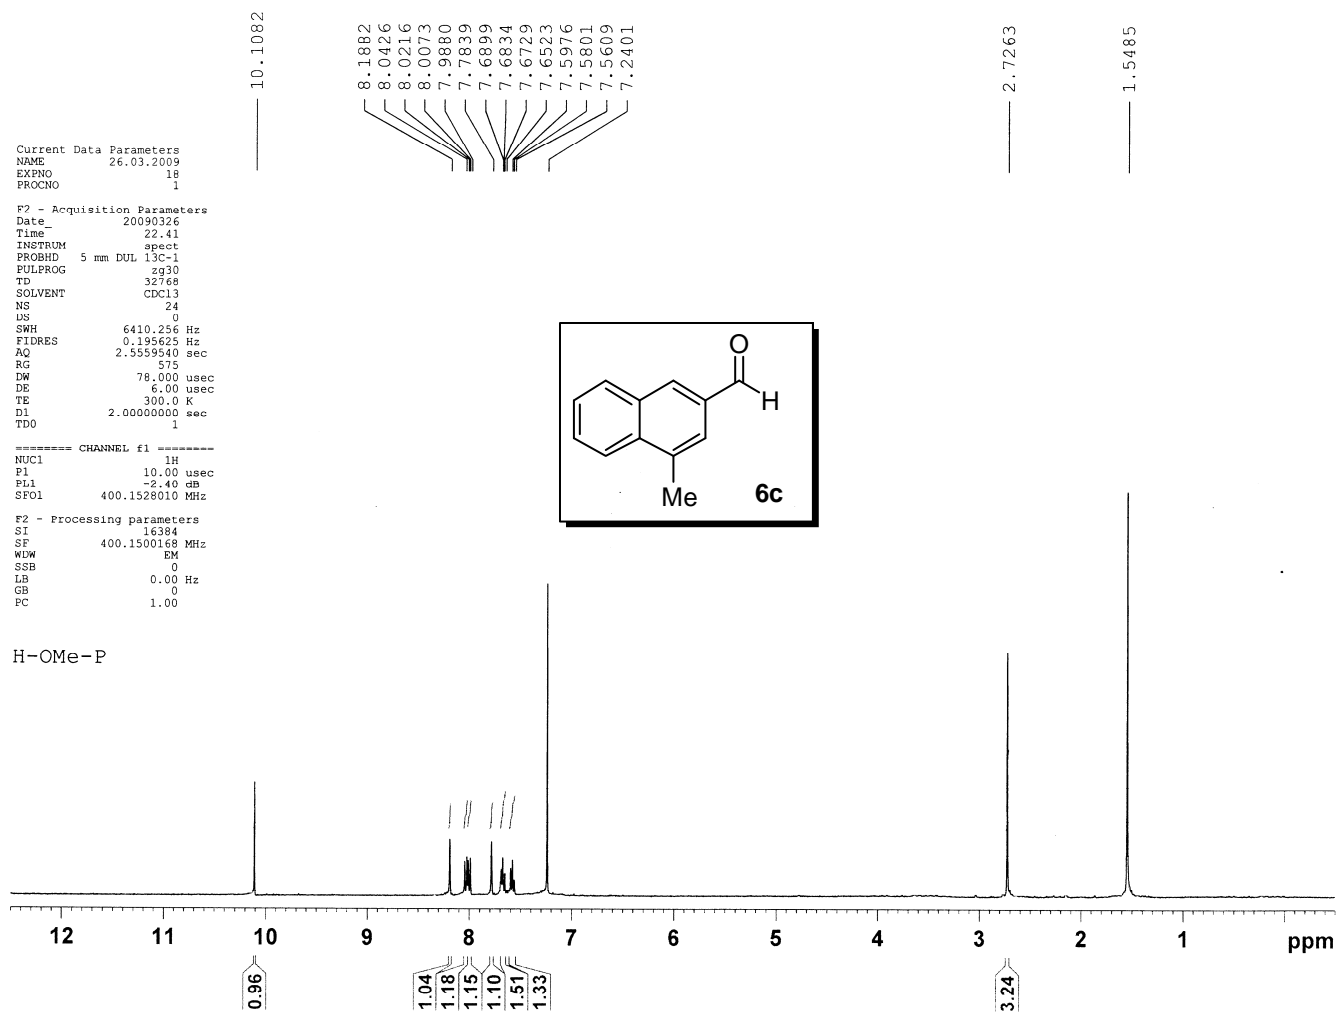

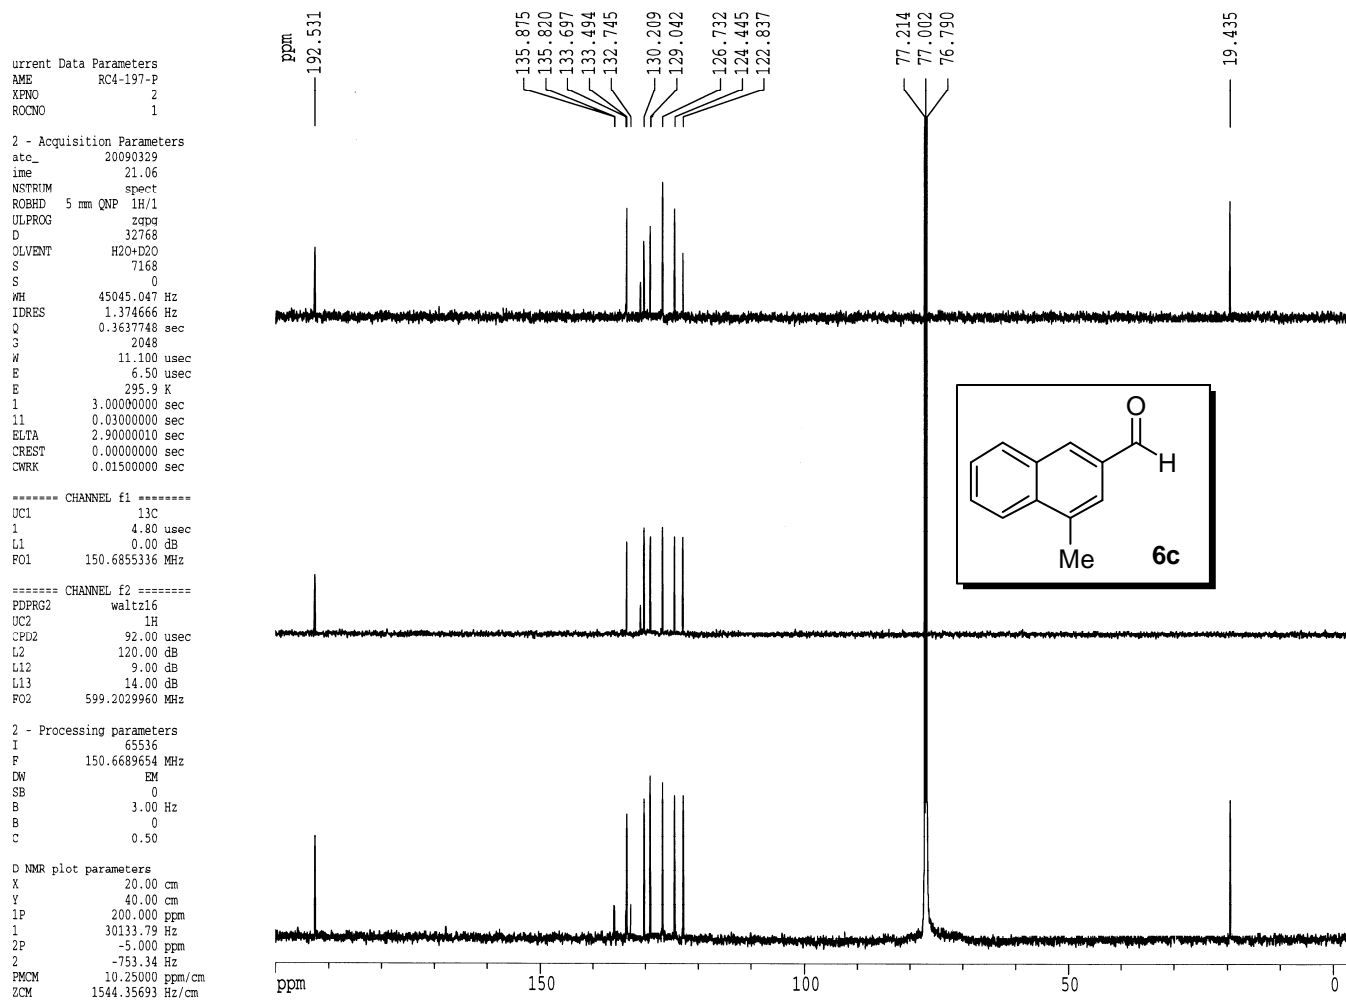

mt Data Parameters  
R04-295P  
1  
1  
Acquisition Parameters  
20090604  
22.42  
spect  
ID 5 mm QNP 1H/1  
UDG 32768  
DNT CXC13  
16  
0  
9615.385 Hz  
0.293438 Hz  
1.7039860 sec  
128  
52.000 usec  
6.50 usec  
302.6 K  
1.00000000 sec  
0.00000000 sec  
0.01500000 sec  
\*\*\* CHANNEL f1 \*\*\*  
1H  
10.00 usec  
3.00 dB  
599.2031592 MHz  
Processing parameters  
32768  
599.2000258 MHz  
EM  
0  
1.00 Hz  
0  
1.00  
R plot parameters  
20.00 cm  
12.00 cm  
11.000 ppm  
6591.20 Hz  
-0.500 ppm  
-299.40 Hz  
0.57500 ppm/cm  
344.54001 Hz/cm

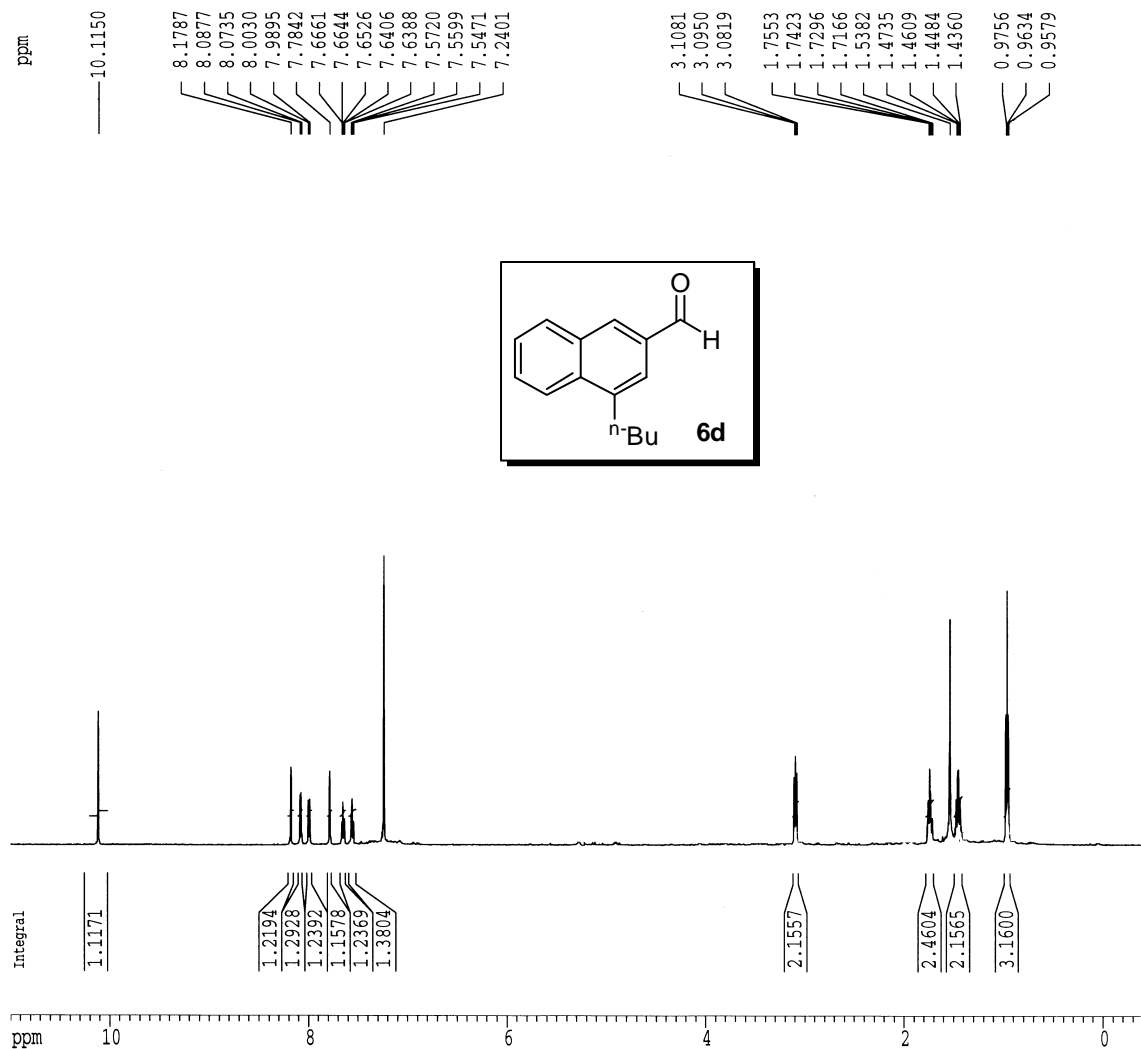

```

ent Data Parameters
: RC4-295P
O 2
NO 1

Acquisition Parameters
: 20090604
: 22.45
RUN spect
HD 5 mm QNP 1H/1
ROG zgpg
32768
F2T1 CDC13
6144
0
45045.047 Hz
ES 1.374666 Hz
0.3637748 sec
1024
11.100 usec
6.50 usec
302.8 K
3.00000000 sec
0.03000000 sec
A 2.90000010 sec
ST 0.00000000 sec
K 0.01500000 sec

==== CHANNEL f1 =====
13C
4.50 usec
0.00 dB
150.6853336 MHz

==== CHANNEL f2 =====
RG2 waltz16
1H
i2 92.00 usec
120.00 dB
11.30 dB
14.00 dB
599.2029960 MHz

Processing parameters
32768
150.6689613 MHz
EM
0
3.00 Hz
0
0.50

MR plot parameters
20.00 cm
40.00 cm
200.000 ppm
30133.79 Hz
0.000 ppm
0.00 Hz
M 10.00000 ppm/cm
f 1506.68958 Hz/cm

```

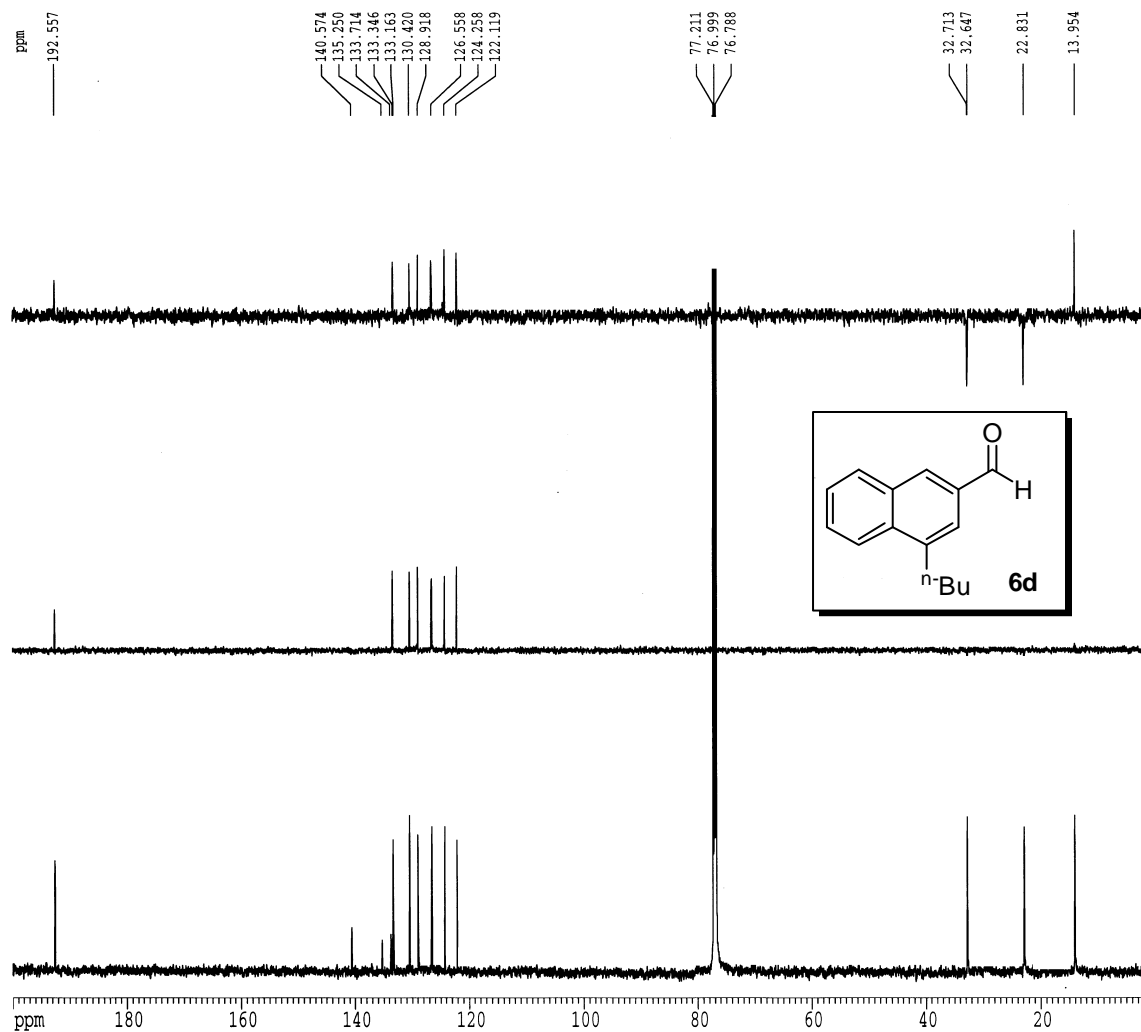

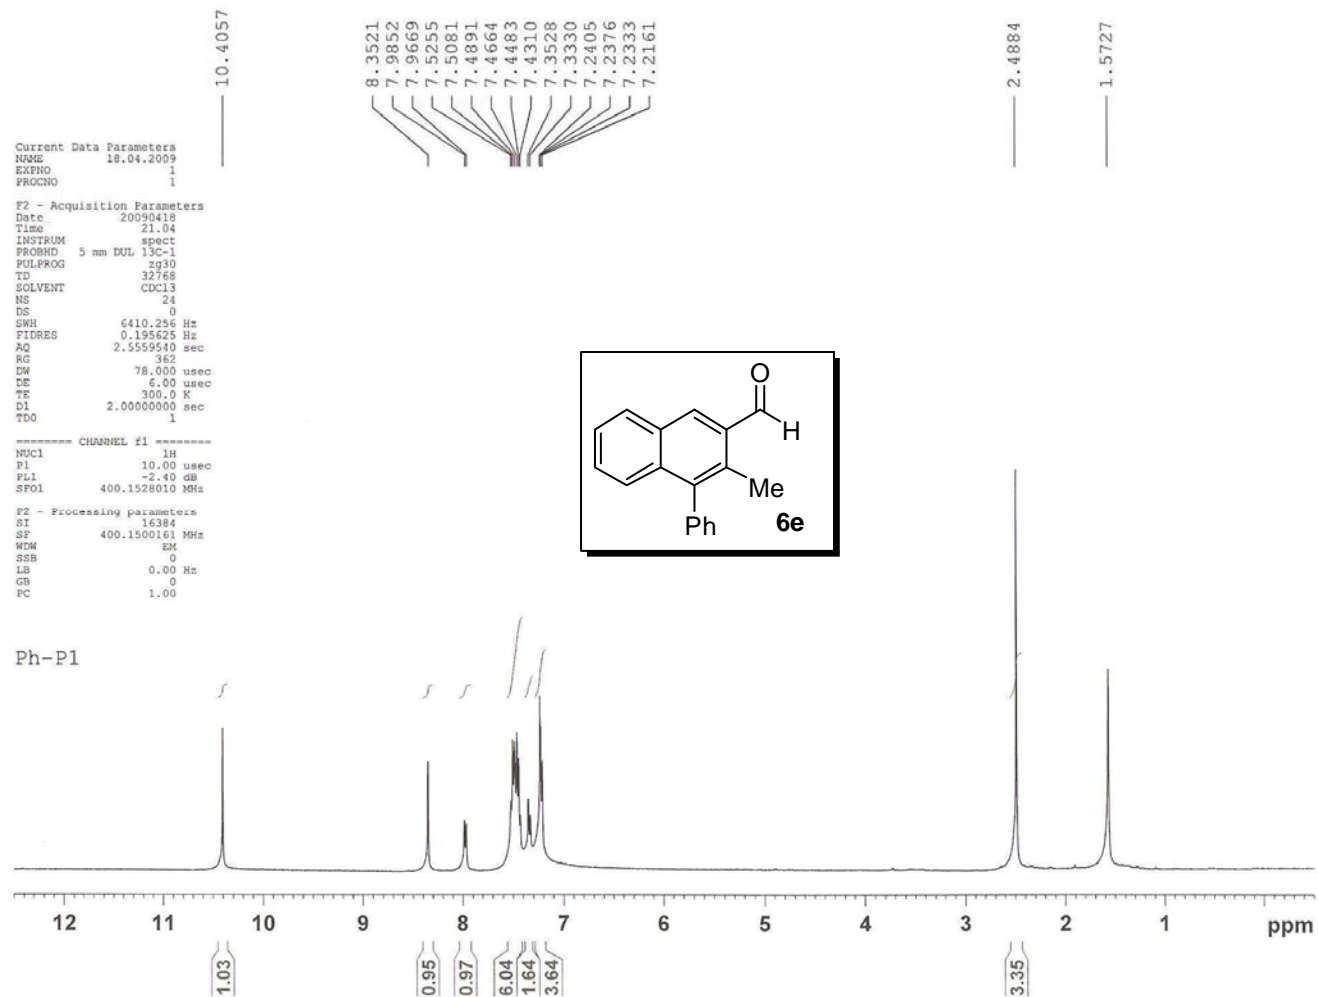



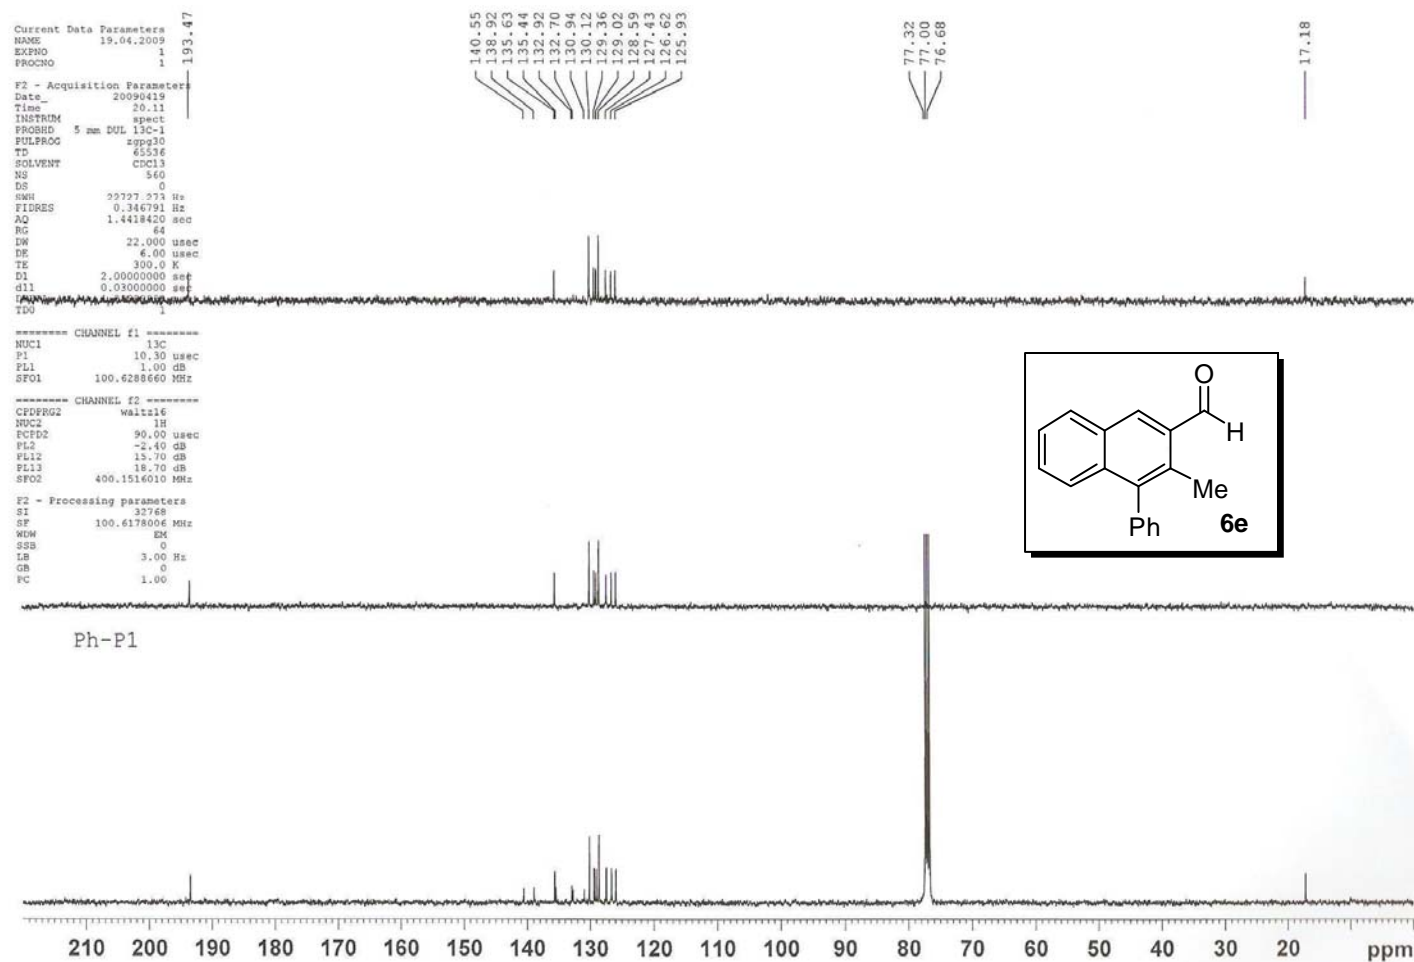

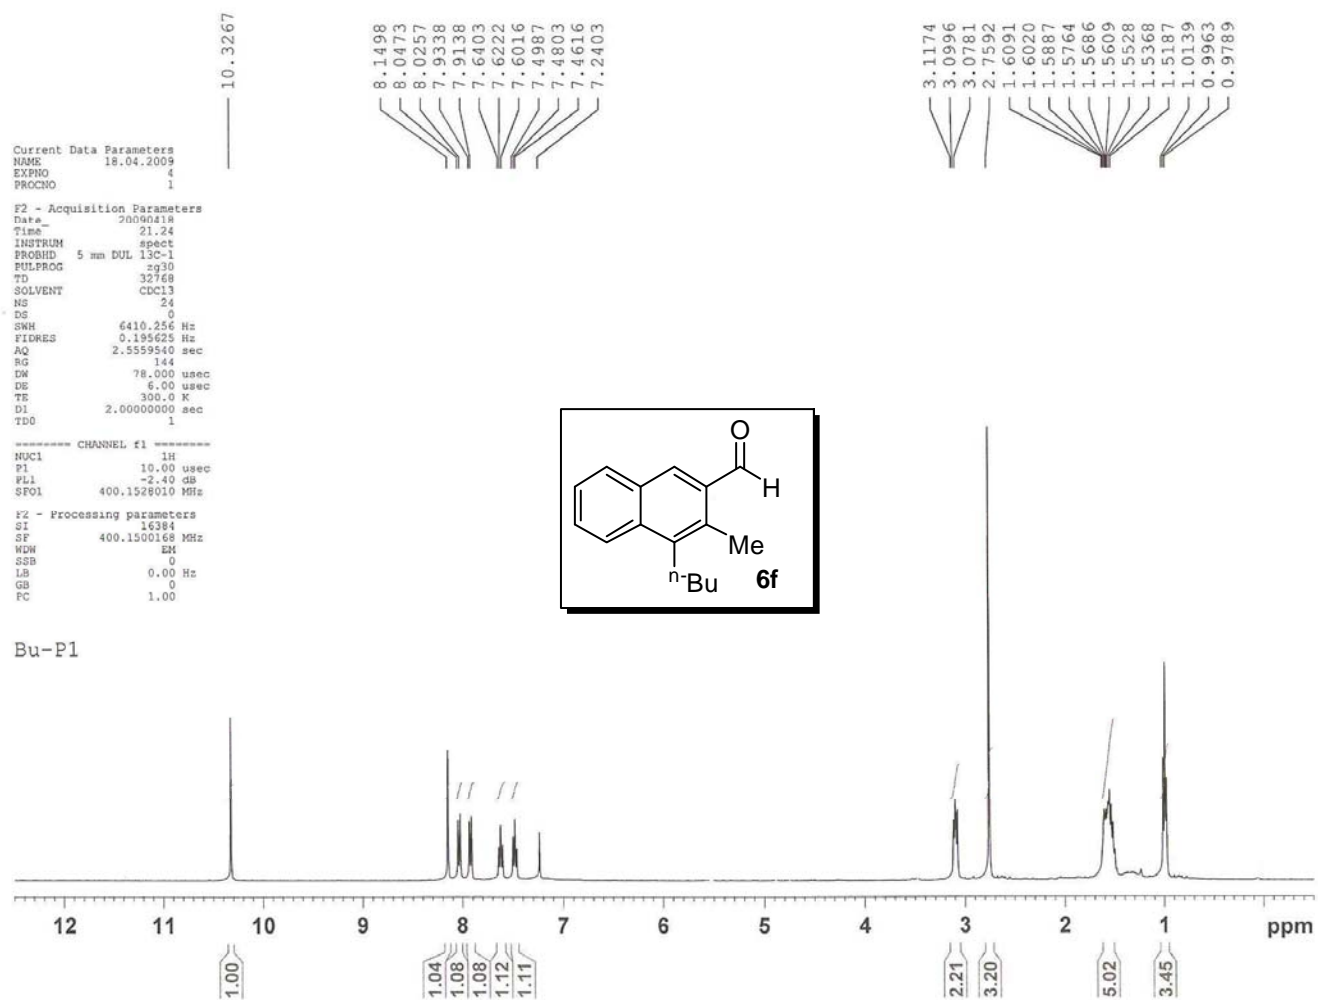

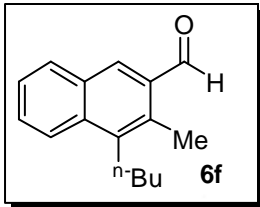

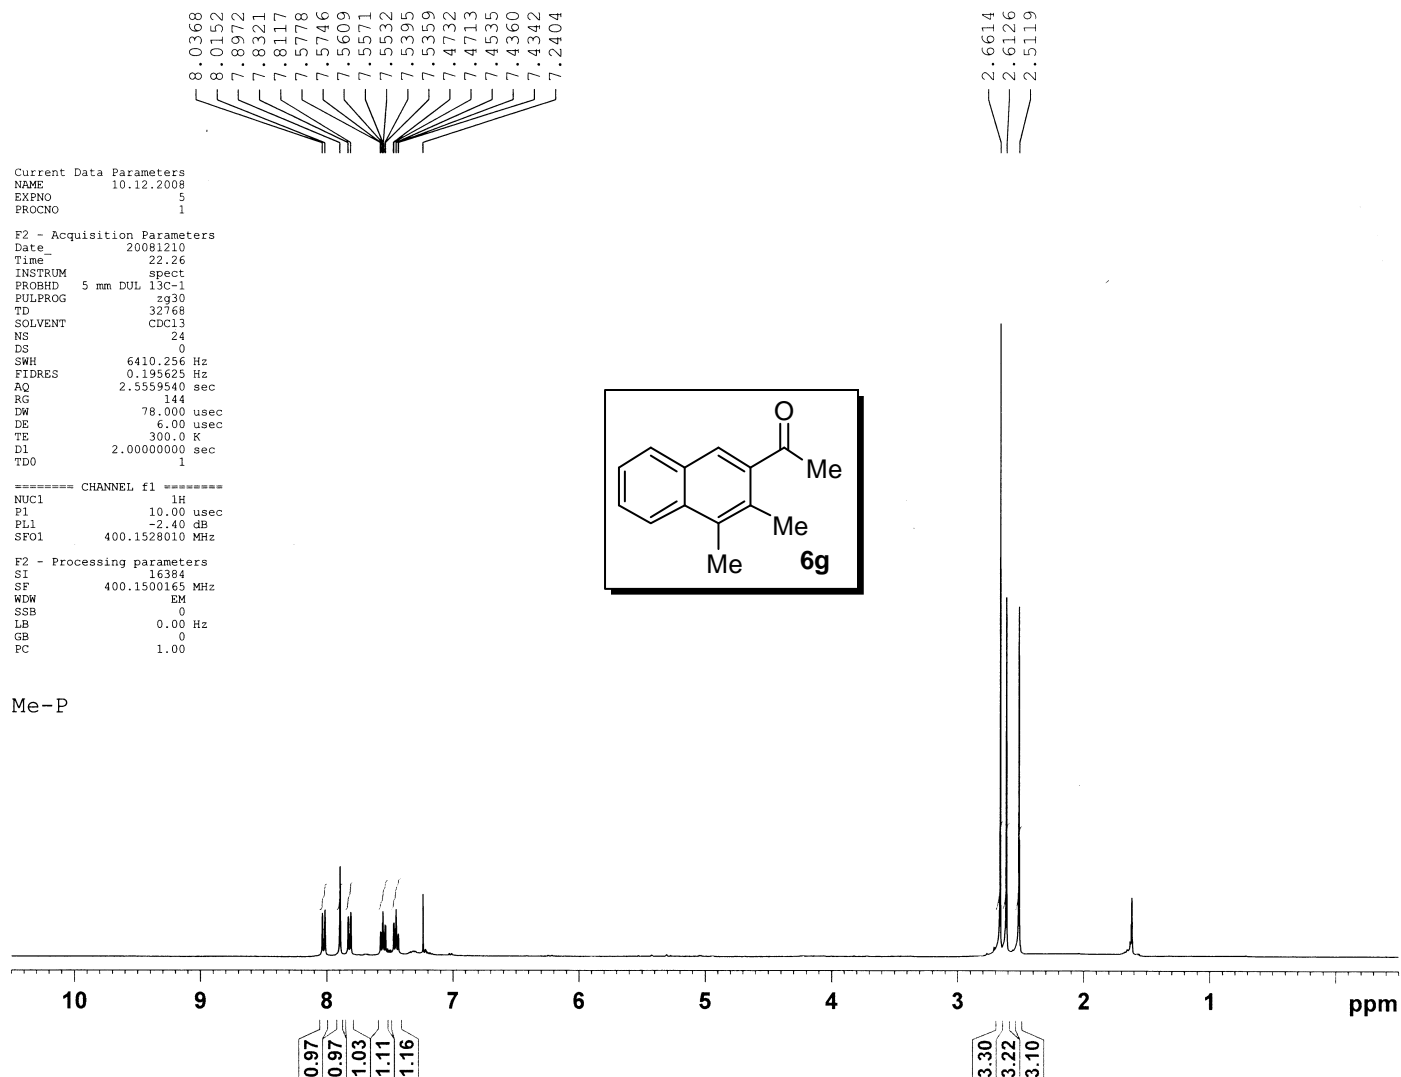

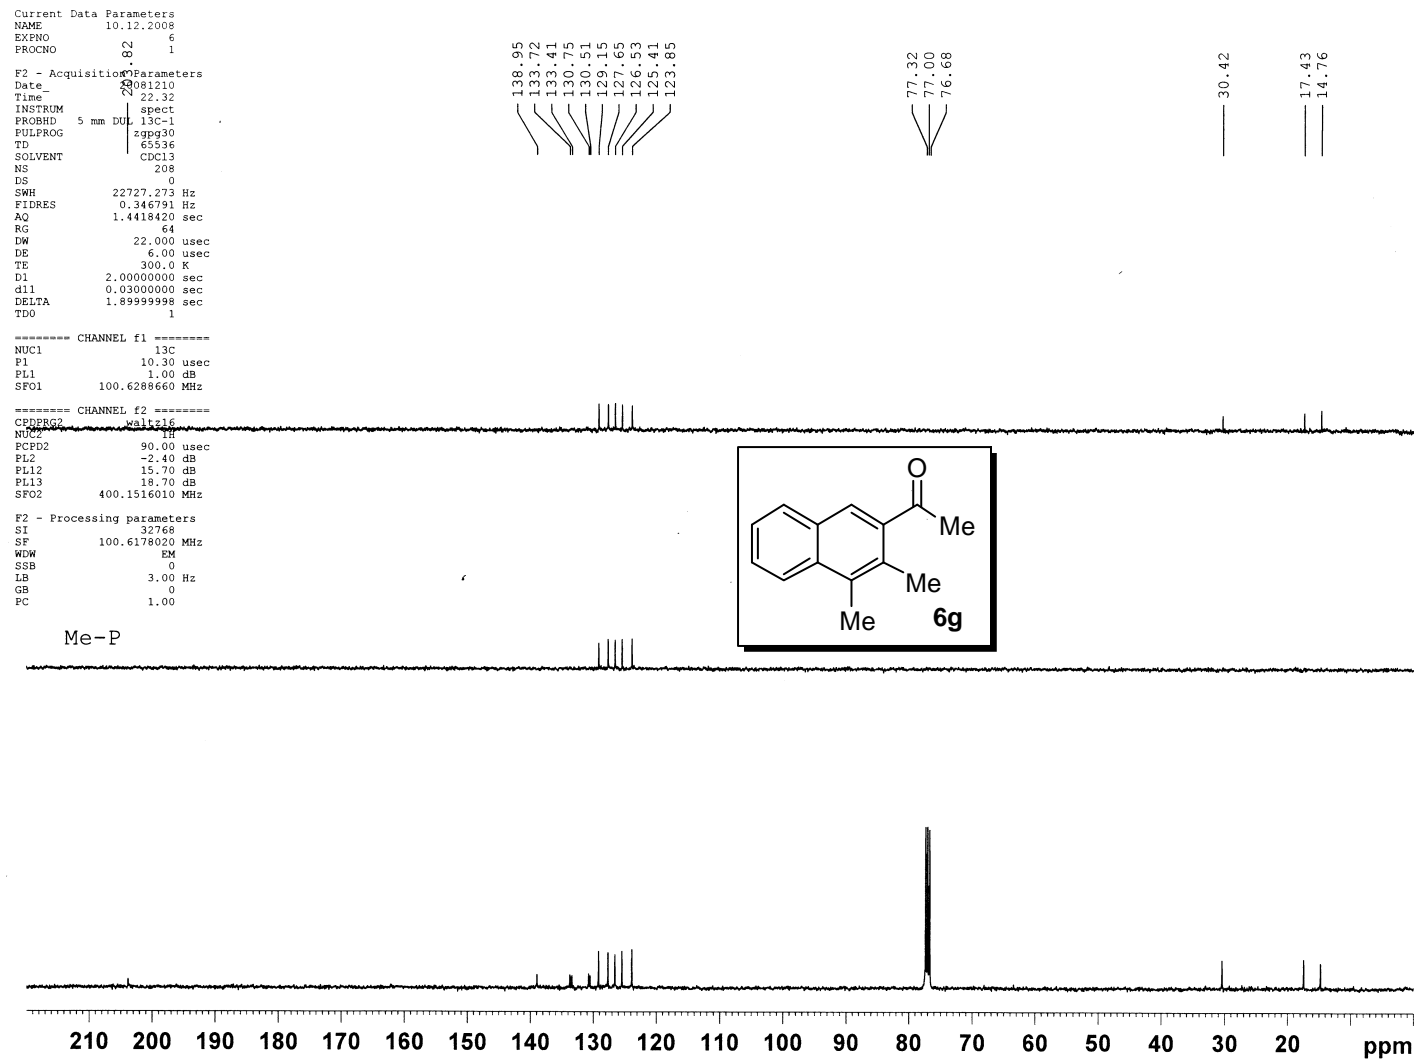

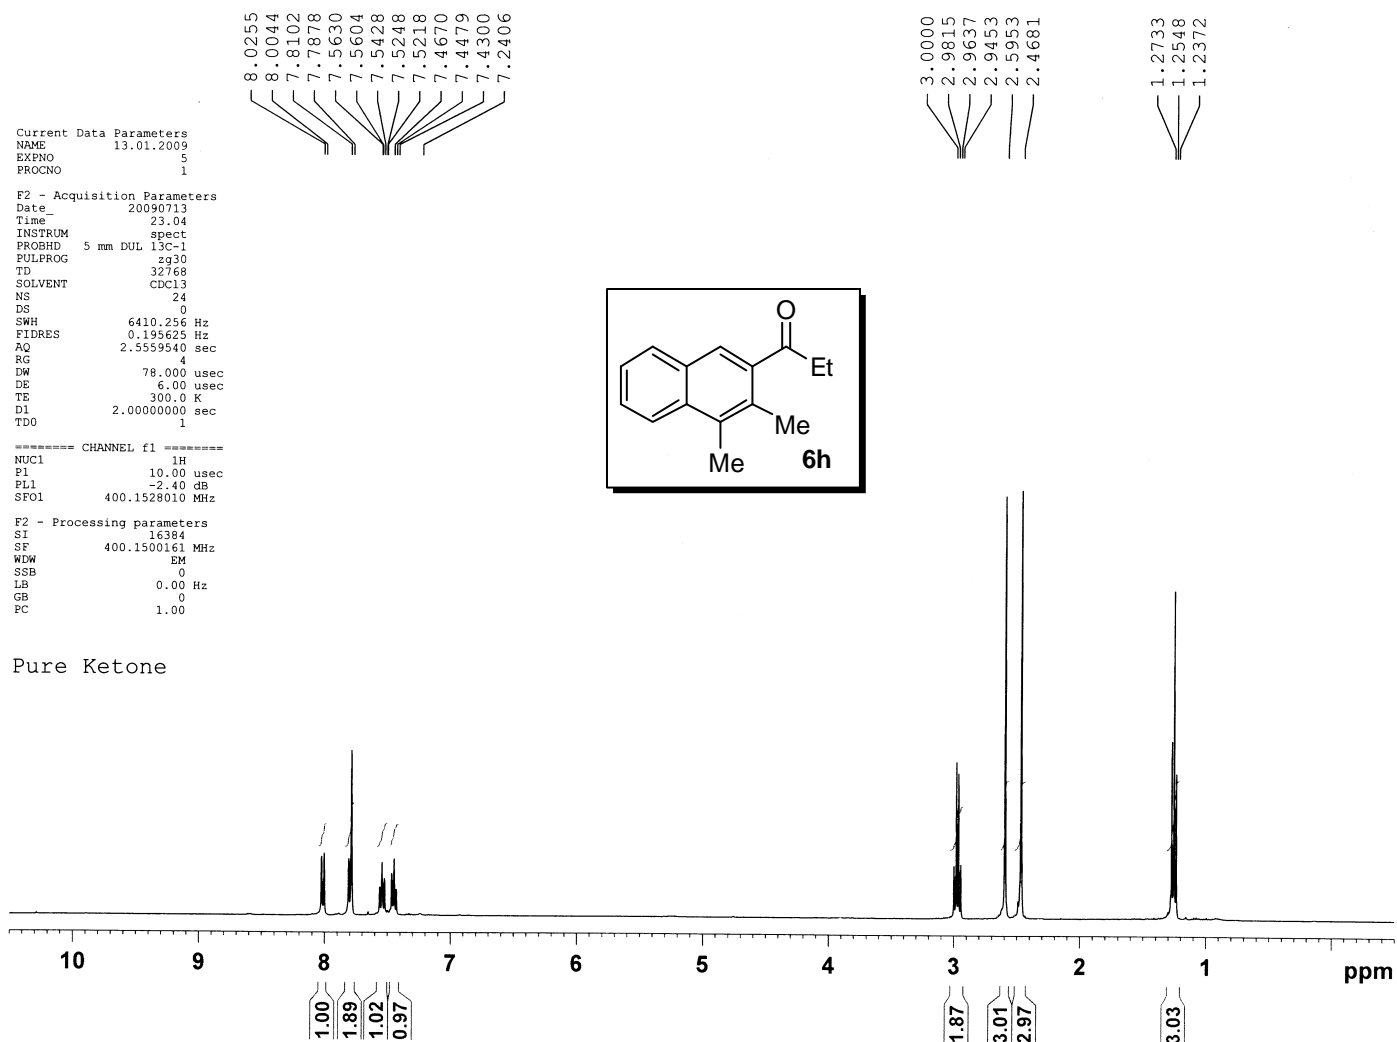

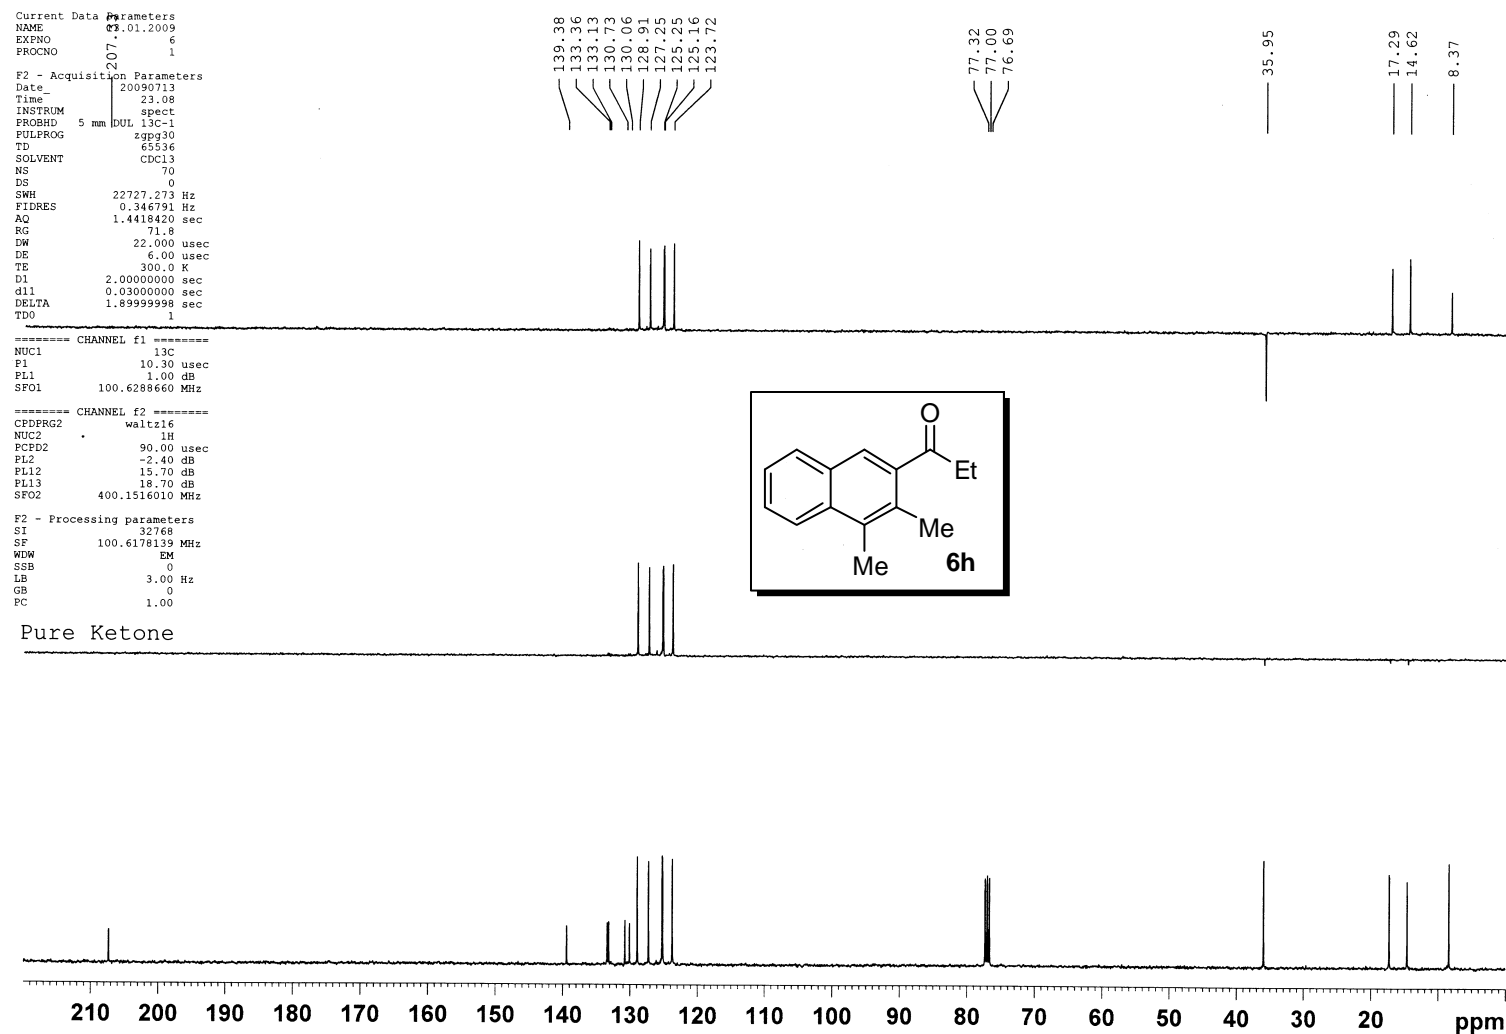

8.3154  
8.0095  
7.9885  
7.9560  
7.9350  
7.8669  
7.8655  
7.6375  
7.6344  
7.6206  
7.6170  
7.6133  
7.5995  
7.5962  
7.5563  
7.5534  
7.5391  
7.5360  
7.5332  
7.5189  
7.5161  
7.2408

Current Data Parameters  
NAME 16.06.2009  
EXPNO 2  
PROCNO 1

F2 - Acquisition Parameters  
Date\_ 20090616  
Time 8.14  
INSTRUM spect  
PROBHD 5 mm DUL 13C-1  
PULPROG zg30  
TD 32768  
SOLVENT CDCl3  
NS 24  
DS 0  
SWH 6410.256 Hz  
FIDRES 0.195625 Hz  
AQ 2.5559540 sec  
RG 362  
DW 78.000 usec  
DE 6.00 usec  
TE 300.0 K  
D1 2.00000000 sec  
TD0 1

===== CHANNEL f1 =====  
NUC1 1H  
P1 10.00 usec  
PL1 -2.40 dB  
SFO1 400.1528010 MHz

F2 - Processing parameters  
SI 16384  
SF 400.1500164 MHz  
WDW EM  
SSB 0  
LB 0.00 Hz  
GB 0  
PC 1.00

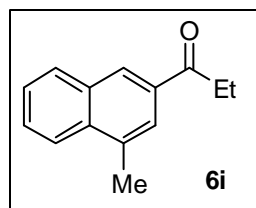

3.1454  
3.1271  
3.1092  
3.0909  
2.7130

1.5770  
1.2820  
1.2642  
1.2458

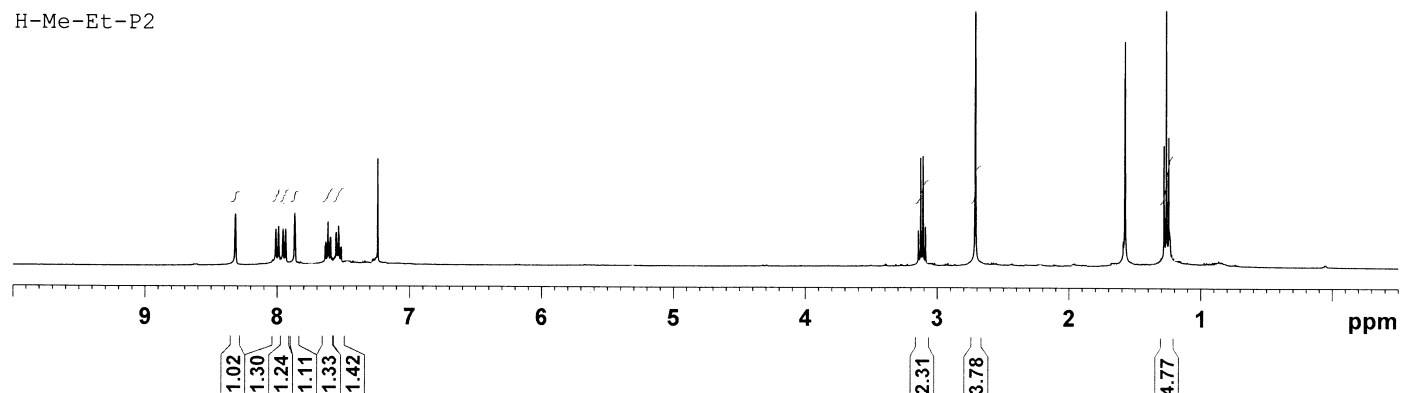



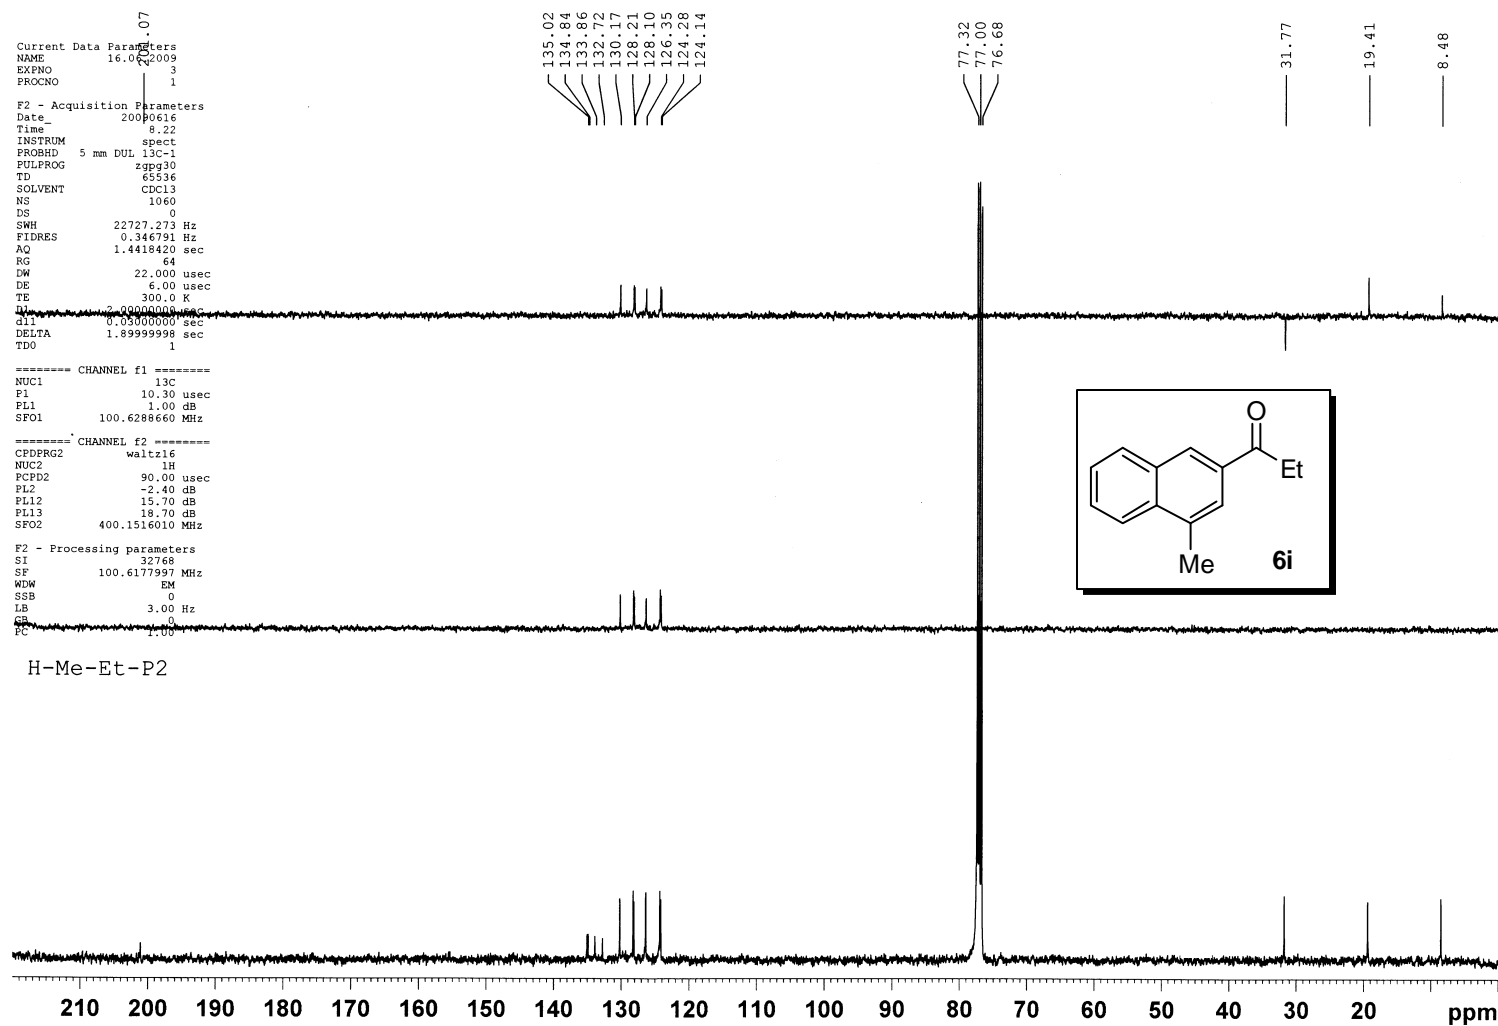

```

Current Data Parameters
ME      RC-4-255-P
PNO     1
OCNO    1

- Acquisition Parameters
te_     20090504
me      22.33
STRUM    spect
OBHD     5 mm QNP 1H/1
LPROG    zg
         32768
LVENT    CDC13
         16
         0
H        9615.385 Hz
DRES     0.293438 Hz
         1.7039860 sec
         256
         52.000 usec
         6.50 usec
         299.9 K
         1.00000000 sec
REST     0.00000000 sec
WRK      0.01500000 sec

===== CHANNEL f1 =====
C1       1H
         14.00 usec
1        -5.00 dB
O1       599.2035952 MHz

- Processing parameters
         32768
         599.2000255 MHz
W        no
B        0
         0.00 Hz
         0
         1.00

NMR plot parameters
         20.00 cm
         8.00 cm
P        11.000 ppm
         6591.20 Hz
P        -0.500 ppm
         -299.60 Hz
MCM      0.57500 ppm/cm
CM       344.54001 Hz/cm

```

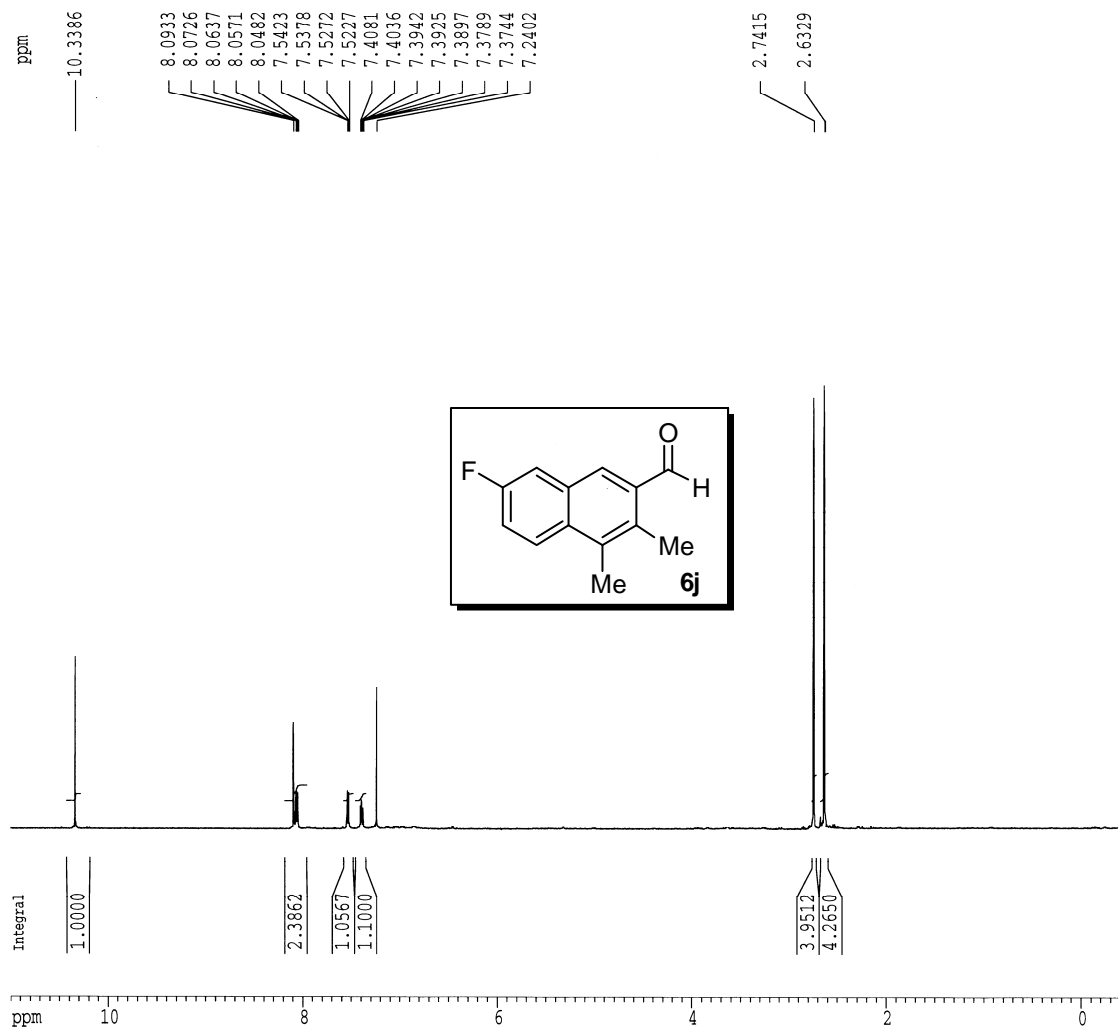

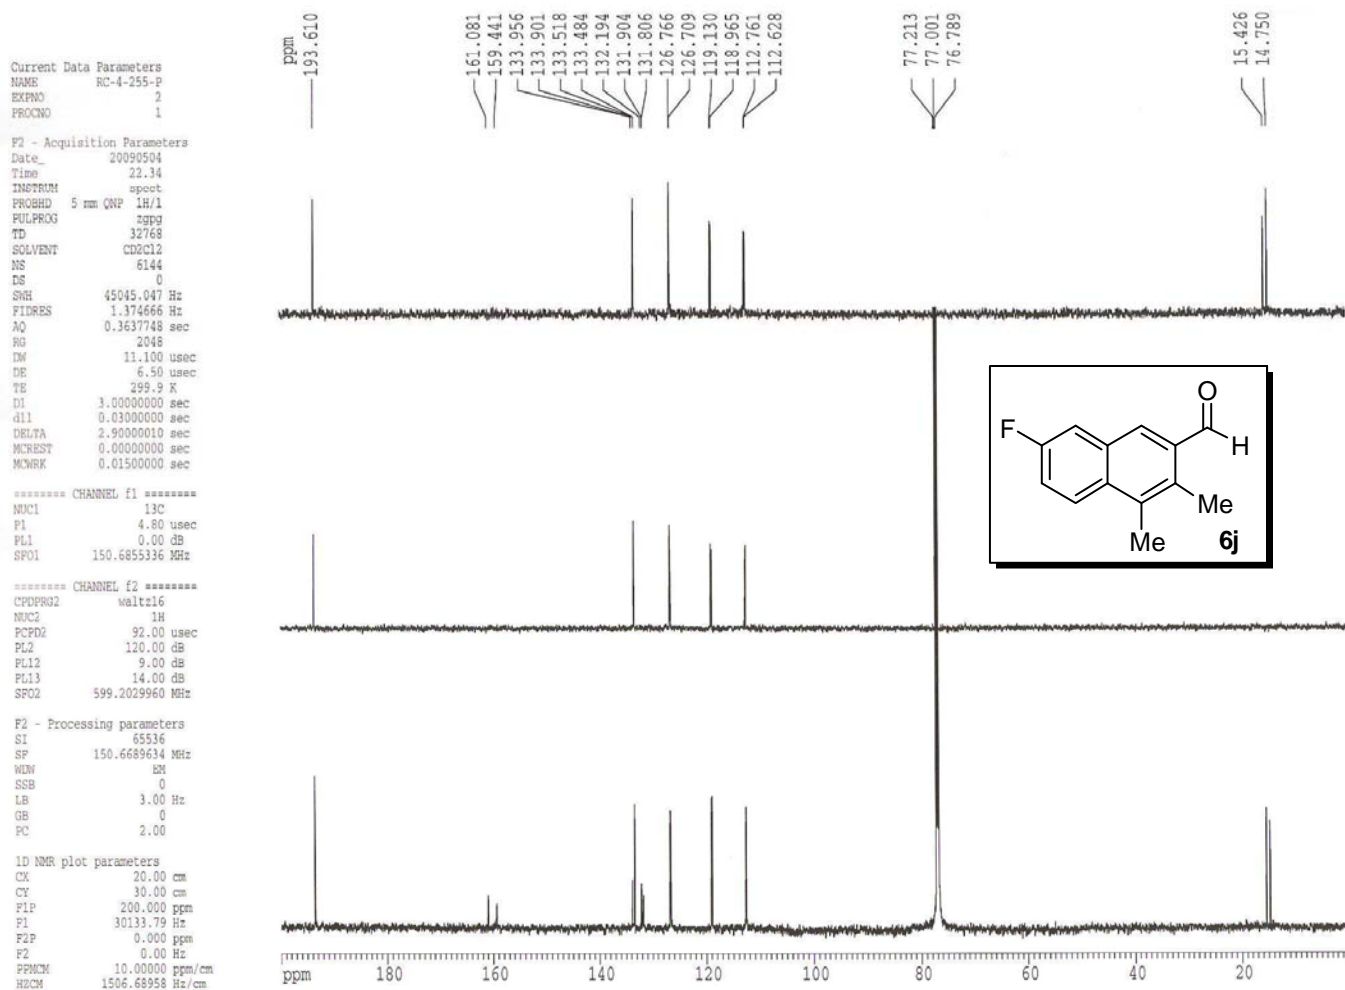

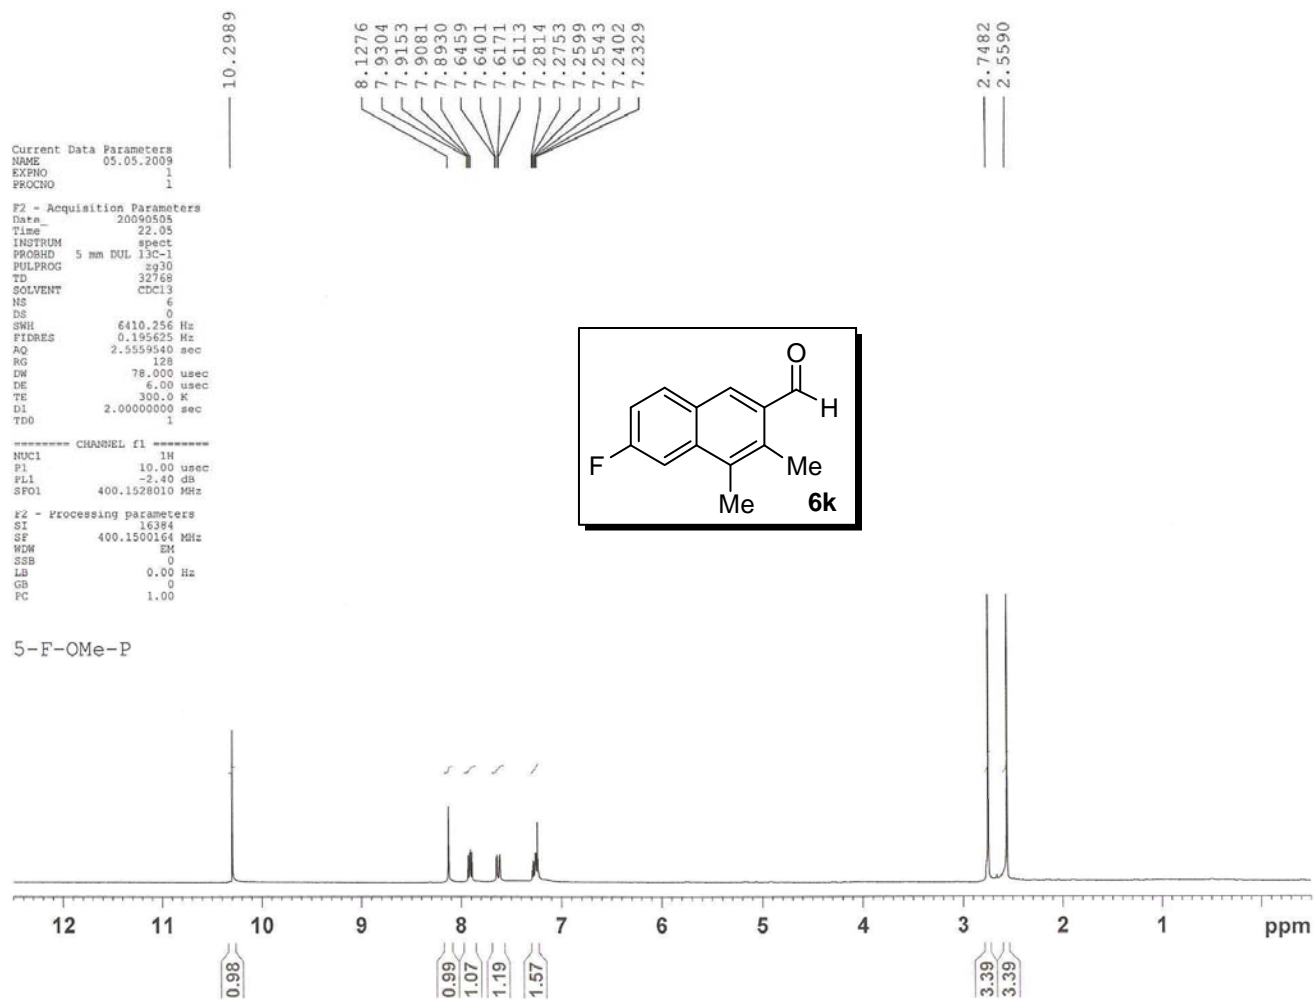

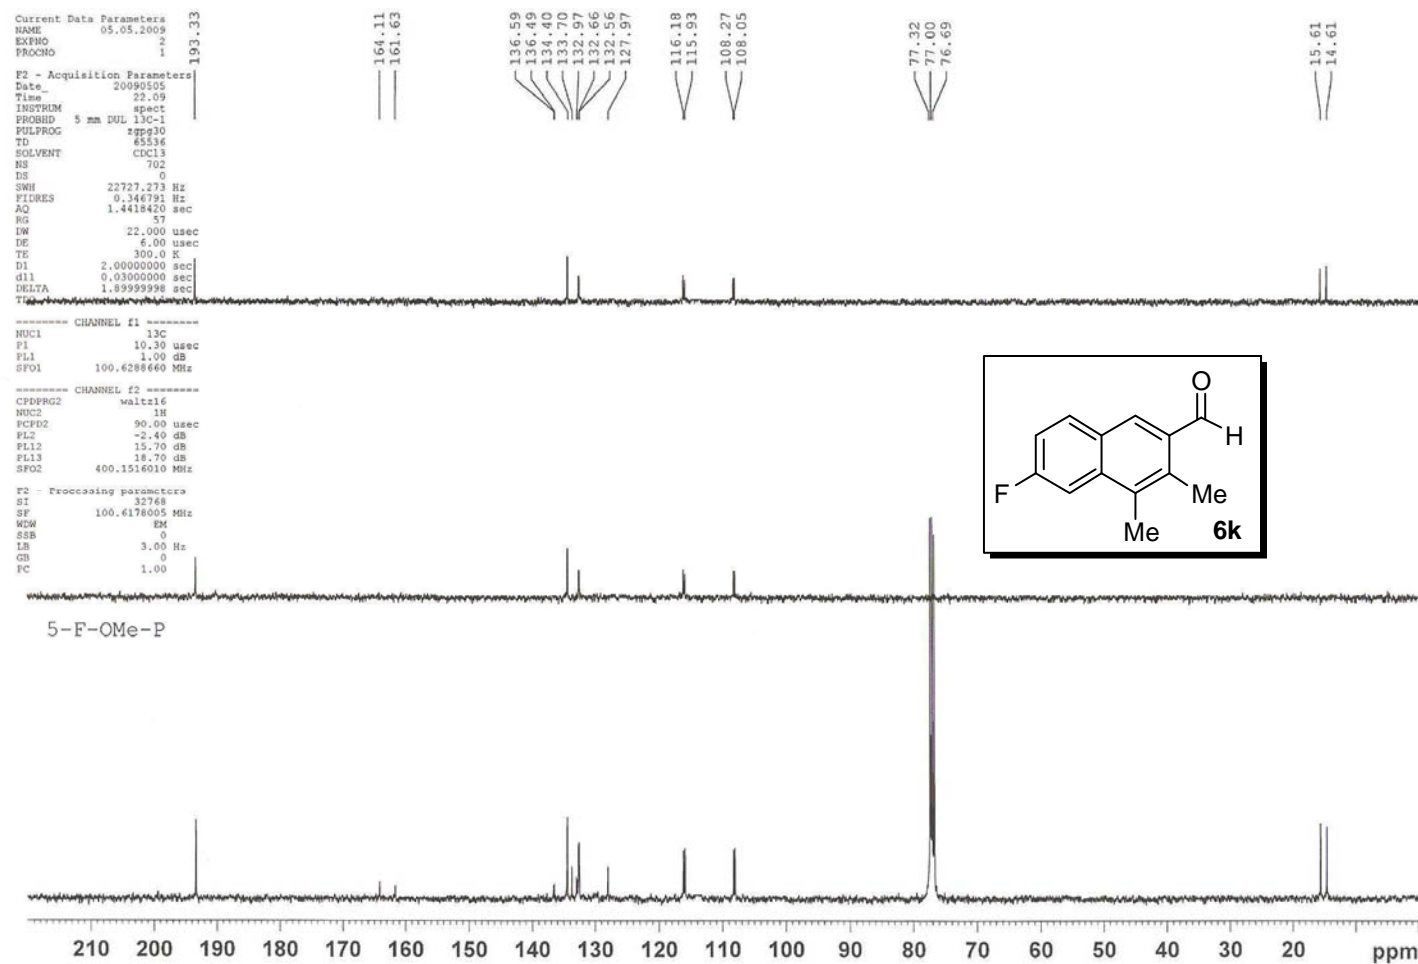

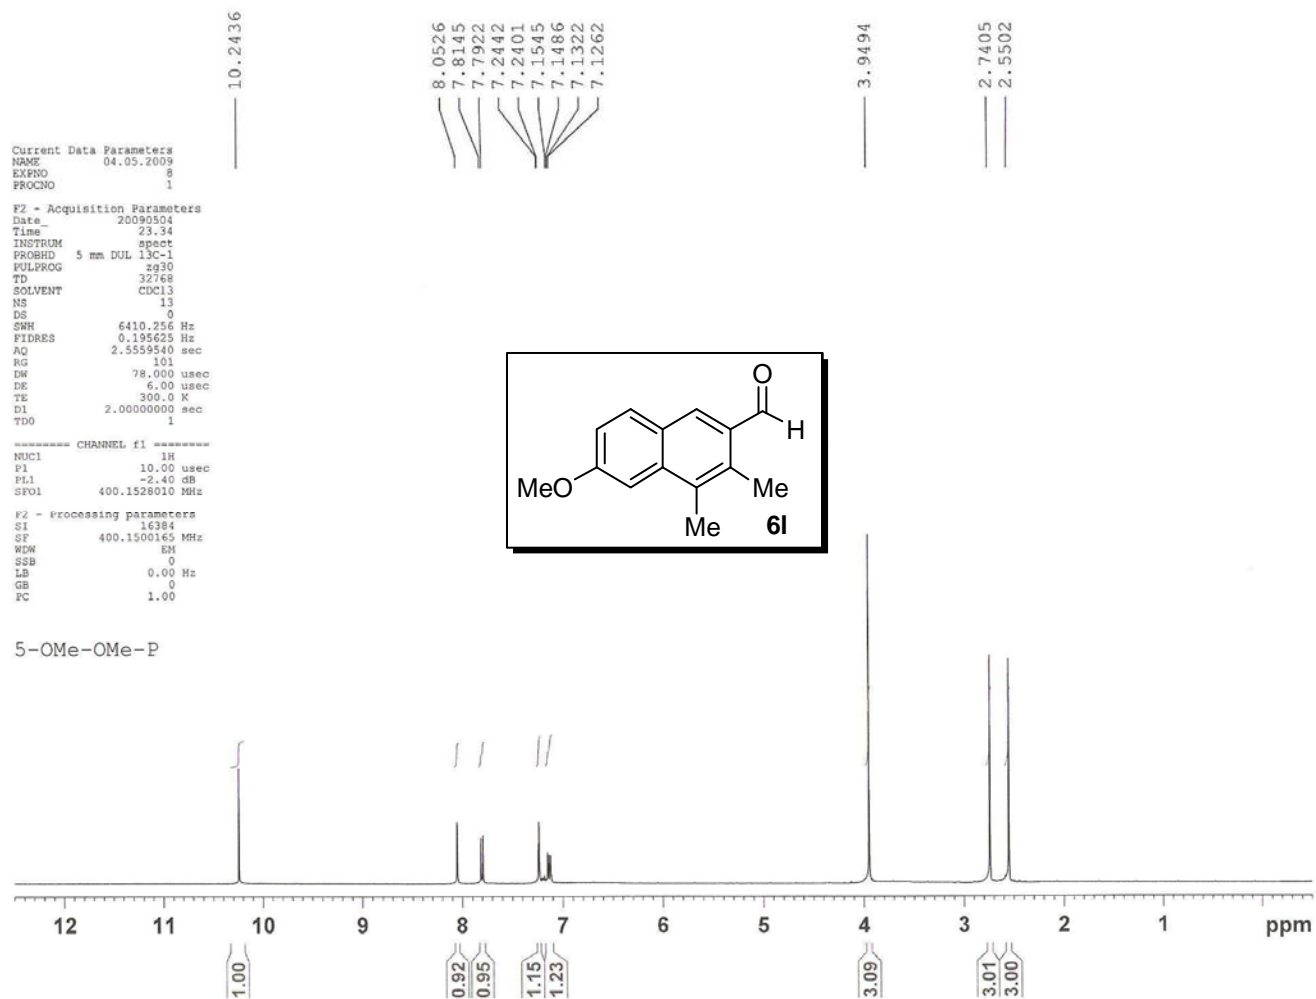

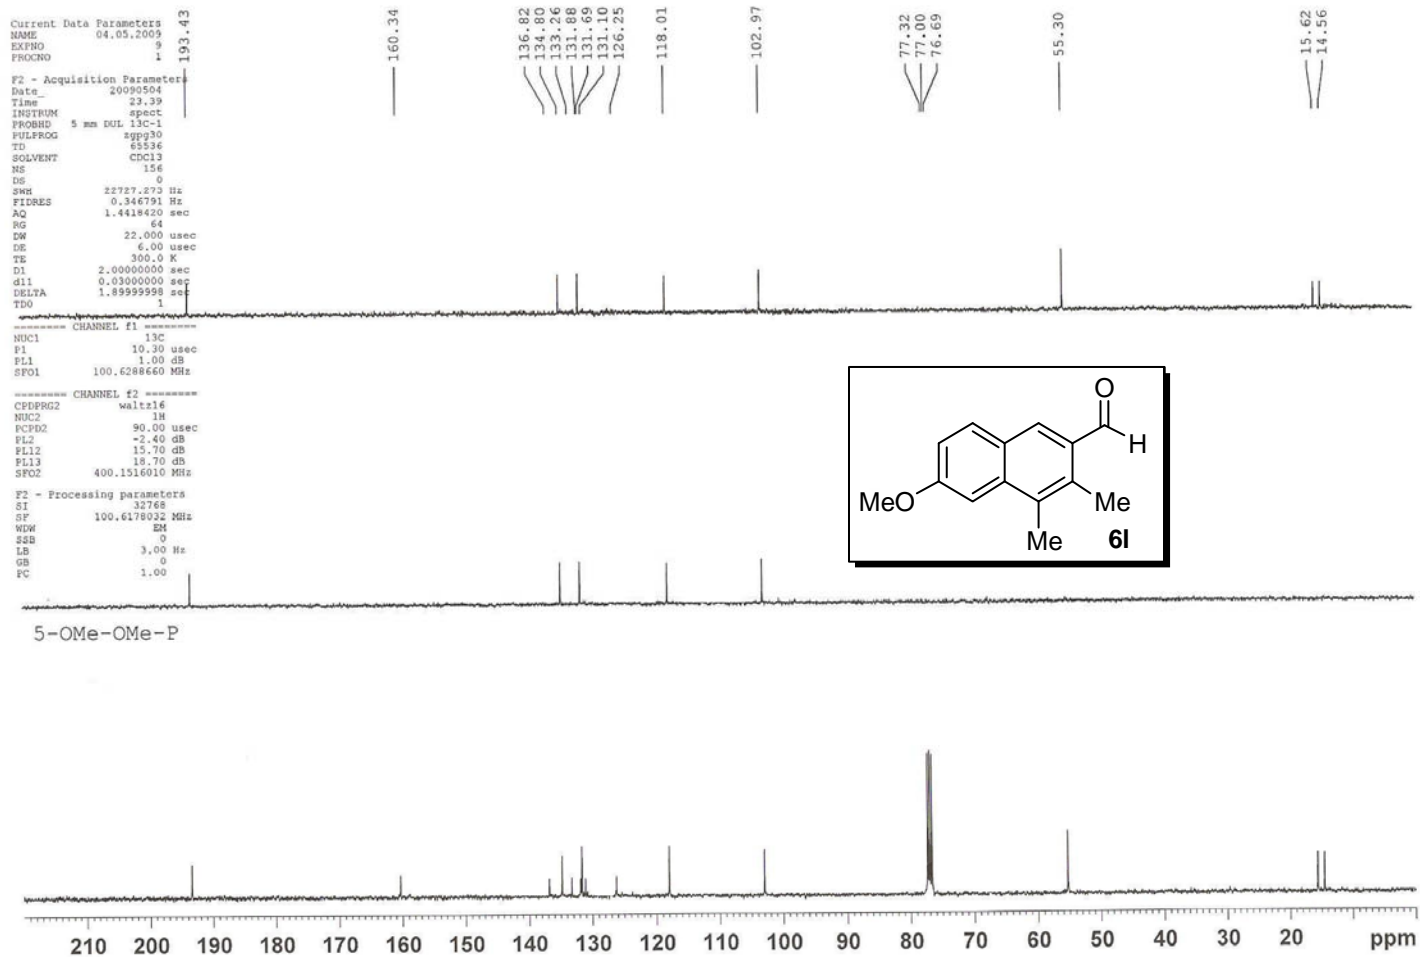

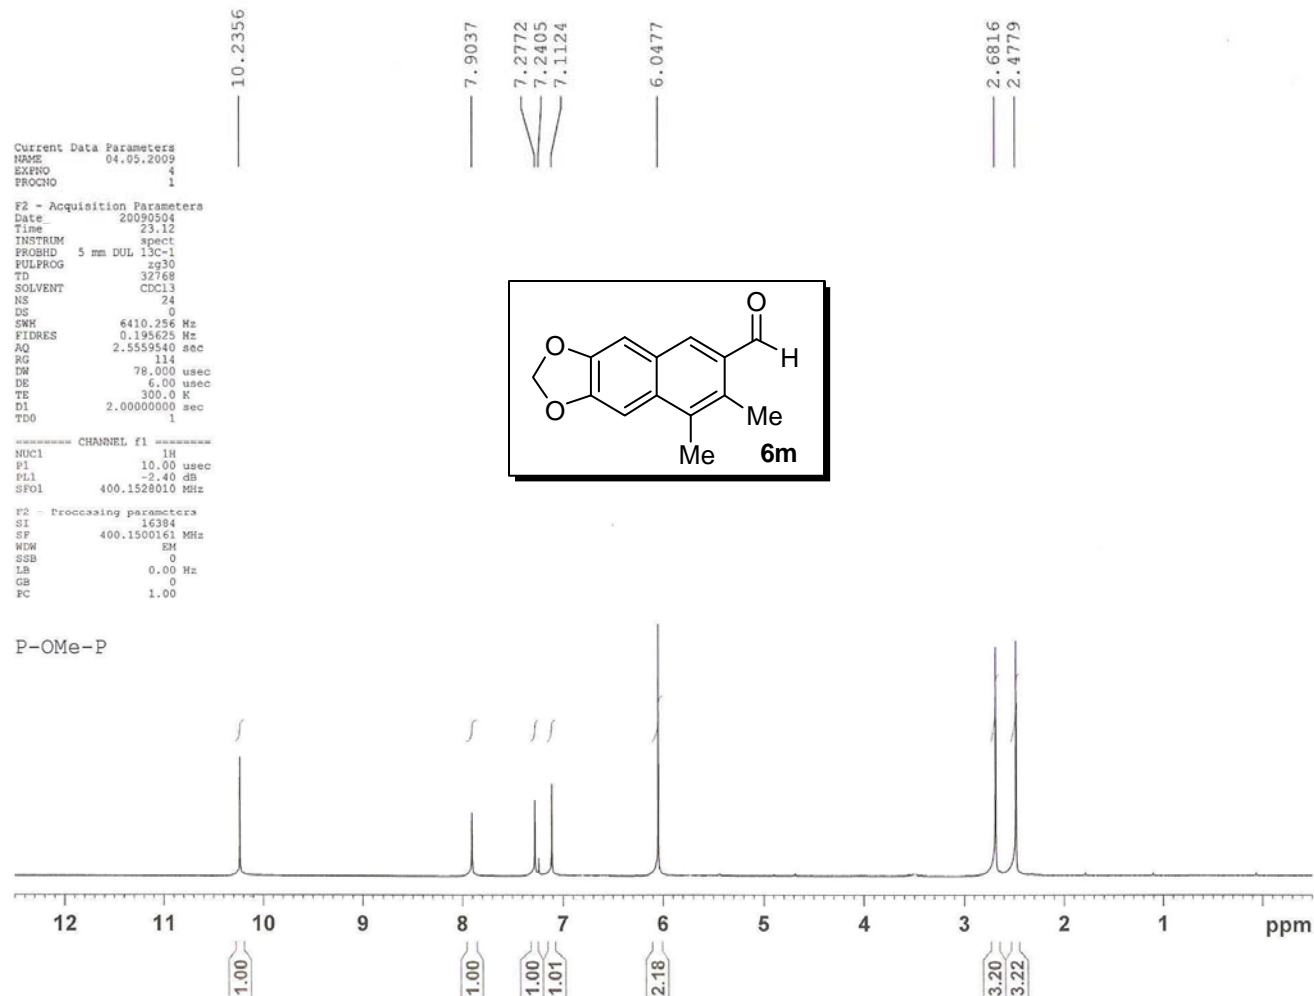



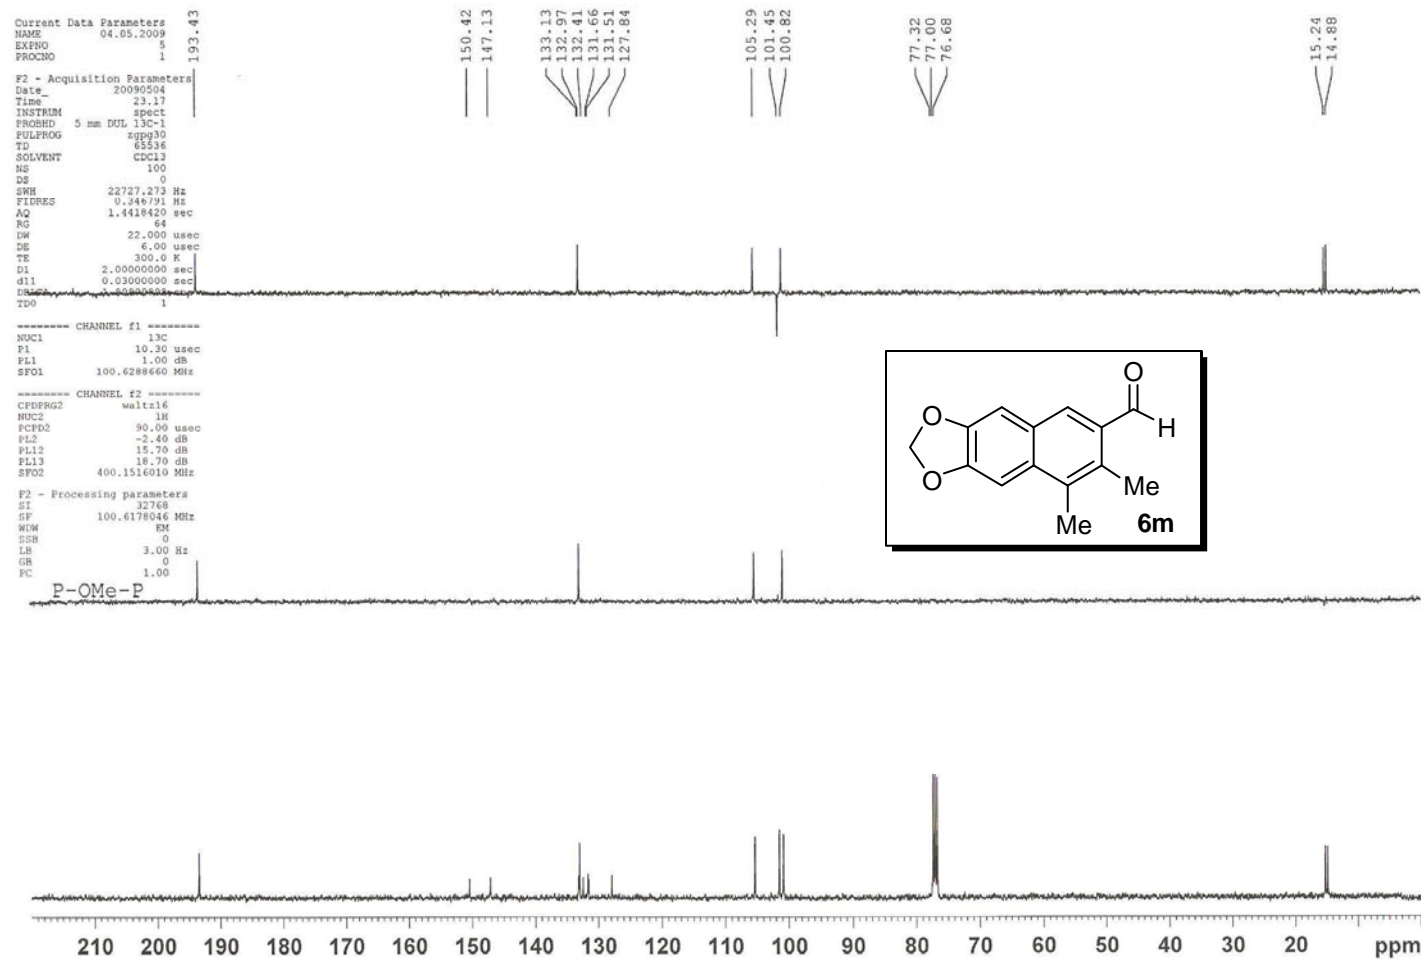

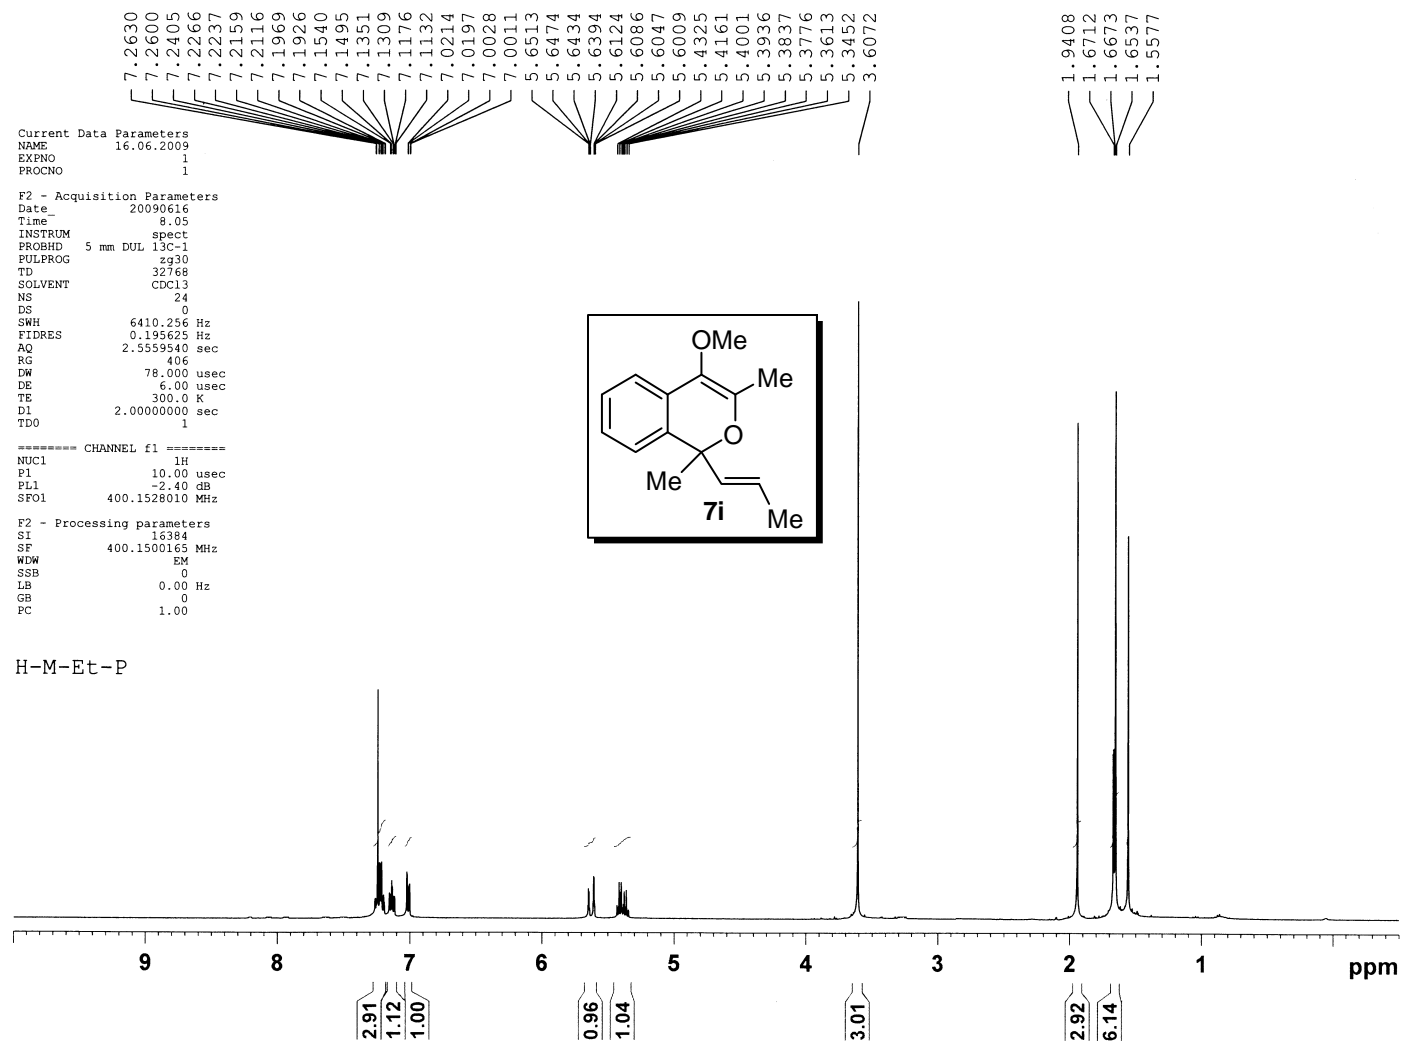

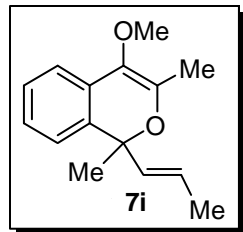

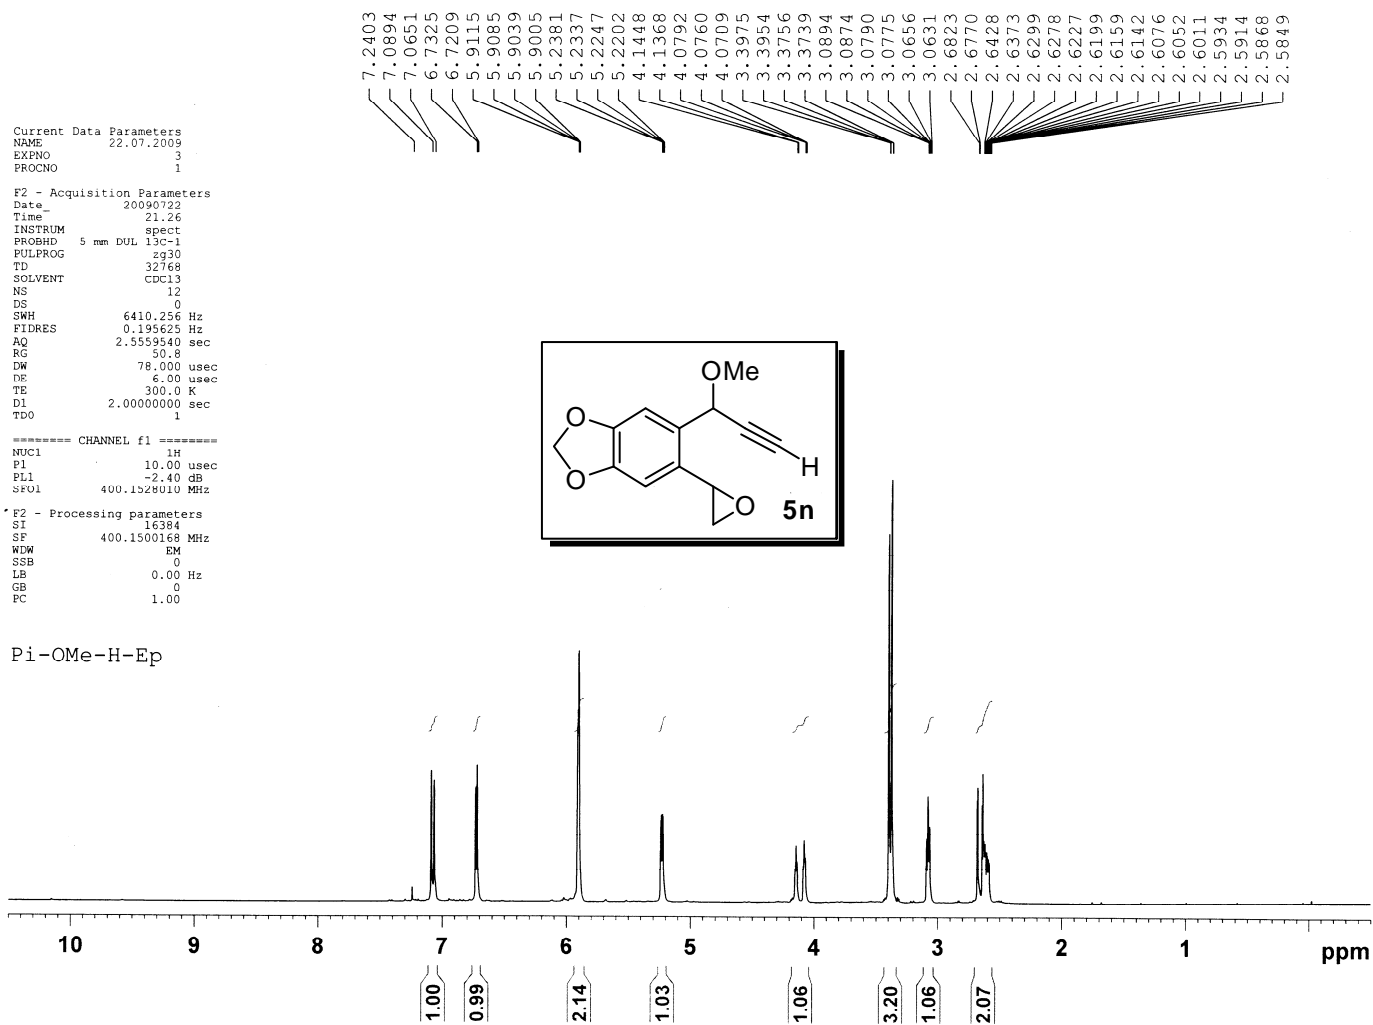

Current Data Parameters  
NAME 28.07.2009  
EXPNO 2  
PROCNO 1

F2 - Acquisition Parameters  
Date\_ 20090728  
Time 17:27  
INSTRUM spect  
PROBHD 5 mm DUL 13C-1  
PULPROG zgpg30  
TD 65536  
SOLVENT CDCl3  
NS 200  
DS 0  
SWH 22727.273 Hz  
FIDRES 0.346791 Hz  
AQ 1.4418420 sec  
RG 57  
DW 22.000 usec  
DE 6.00 usec  
TE 300.0 K  
D1 2.00000000 sec  
d11 0.03000000 sec  
DELTA 1.89999998 sec  
TD0 1

===== CHANNEL f2 =====  
NUC1 13C  
P1 10.30 usec  
PL1 1.00 dB  
SFO1 100.6288660 MHz

===== CHANNEL f2 =====  
CPDPRG2 waltz16  
NUC2 1H  
PCPD2 30.00 usec  
PL2 -2.40 dB  
PL12 15.70 dB  
PL13 18.70 dB  
SFO2 400.1516010 MHz

F2 - Processing parameters  
SI 32768  
SF 100.6178053 MHz  
WDW EM  
SSB 0  
LB 3.00 Hz  
GB 0  
PC 1.00

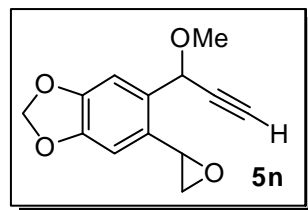

Pi-OMe-D-Ep

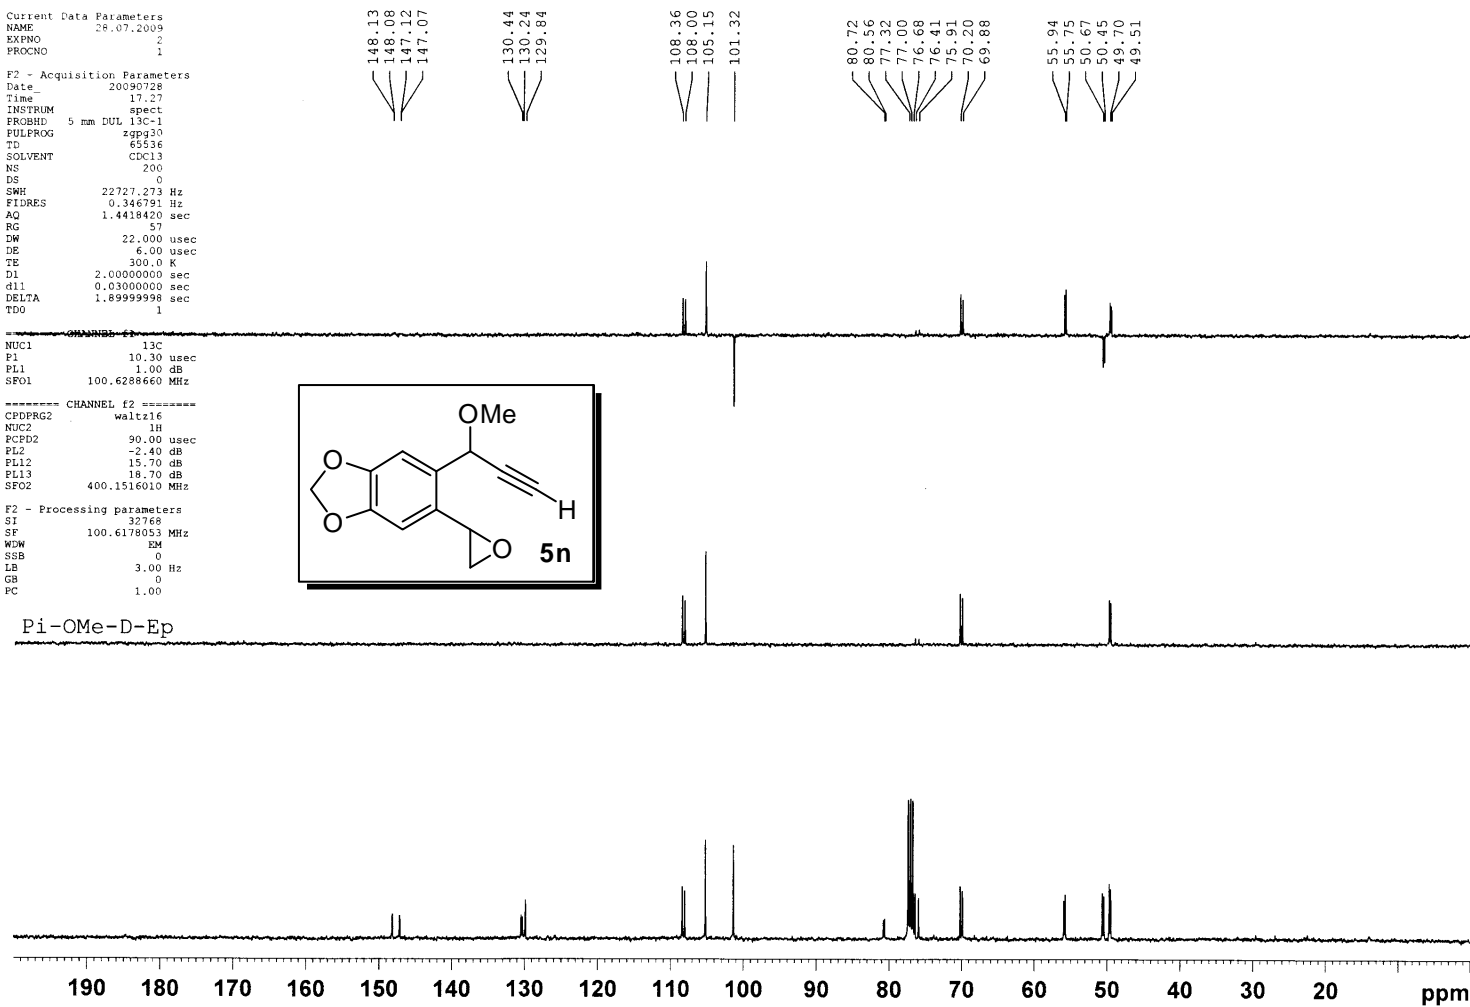

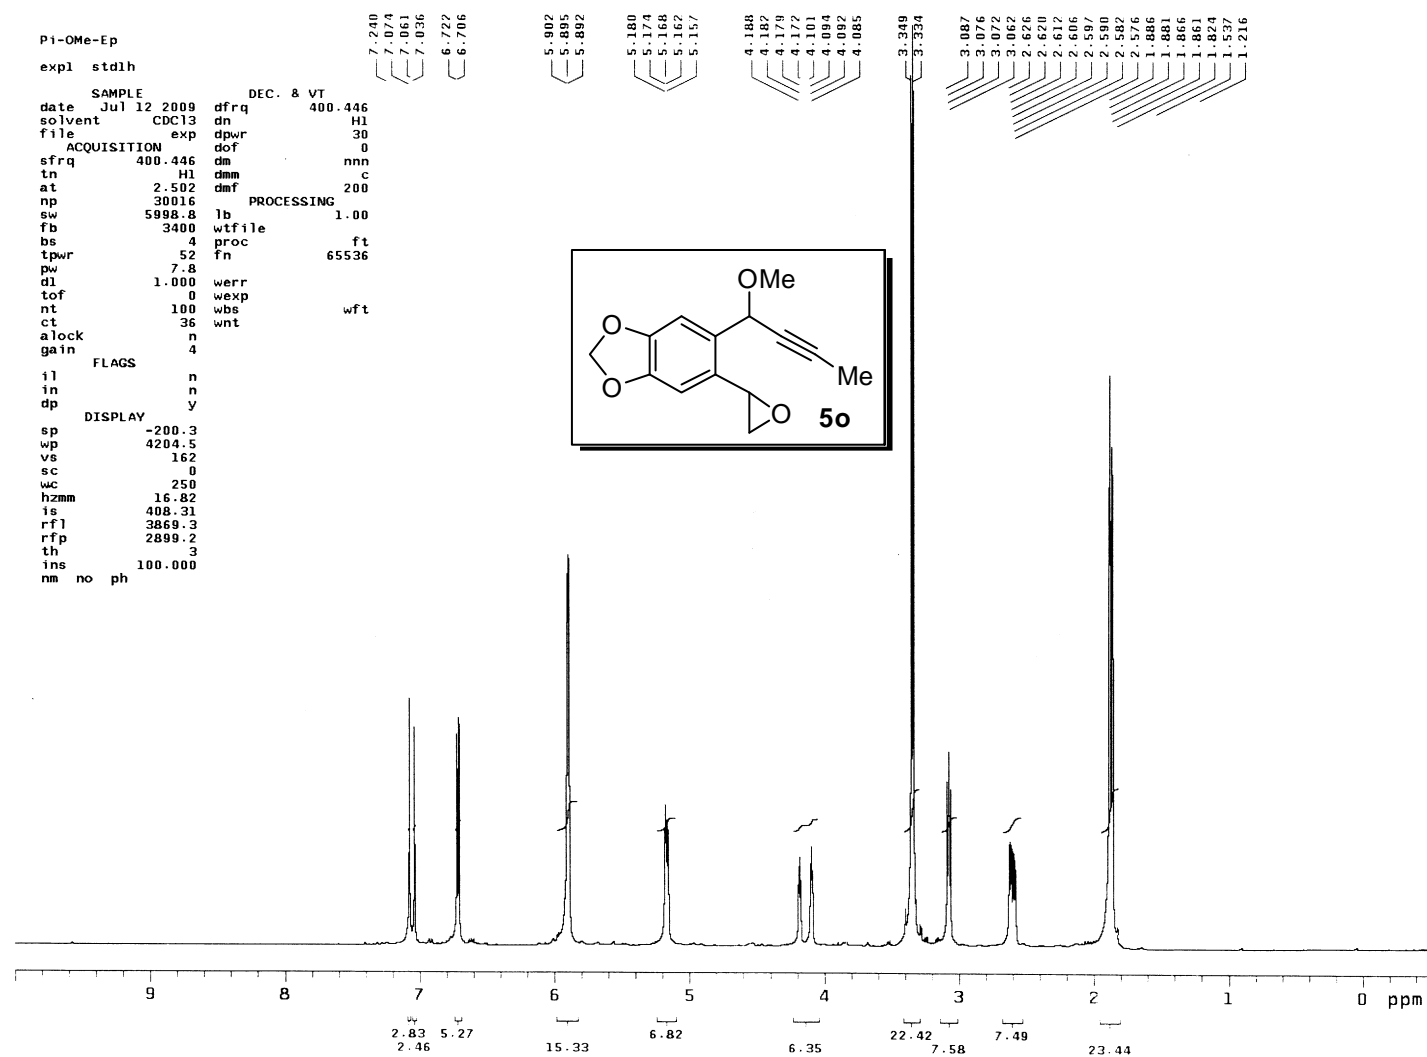

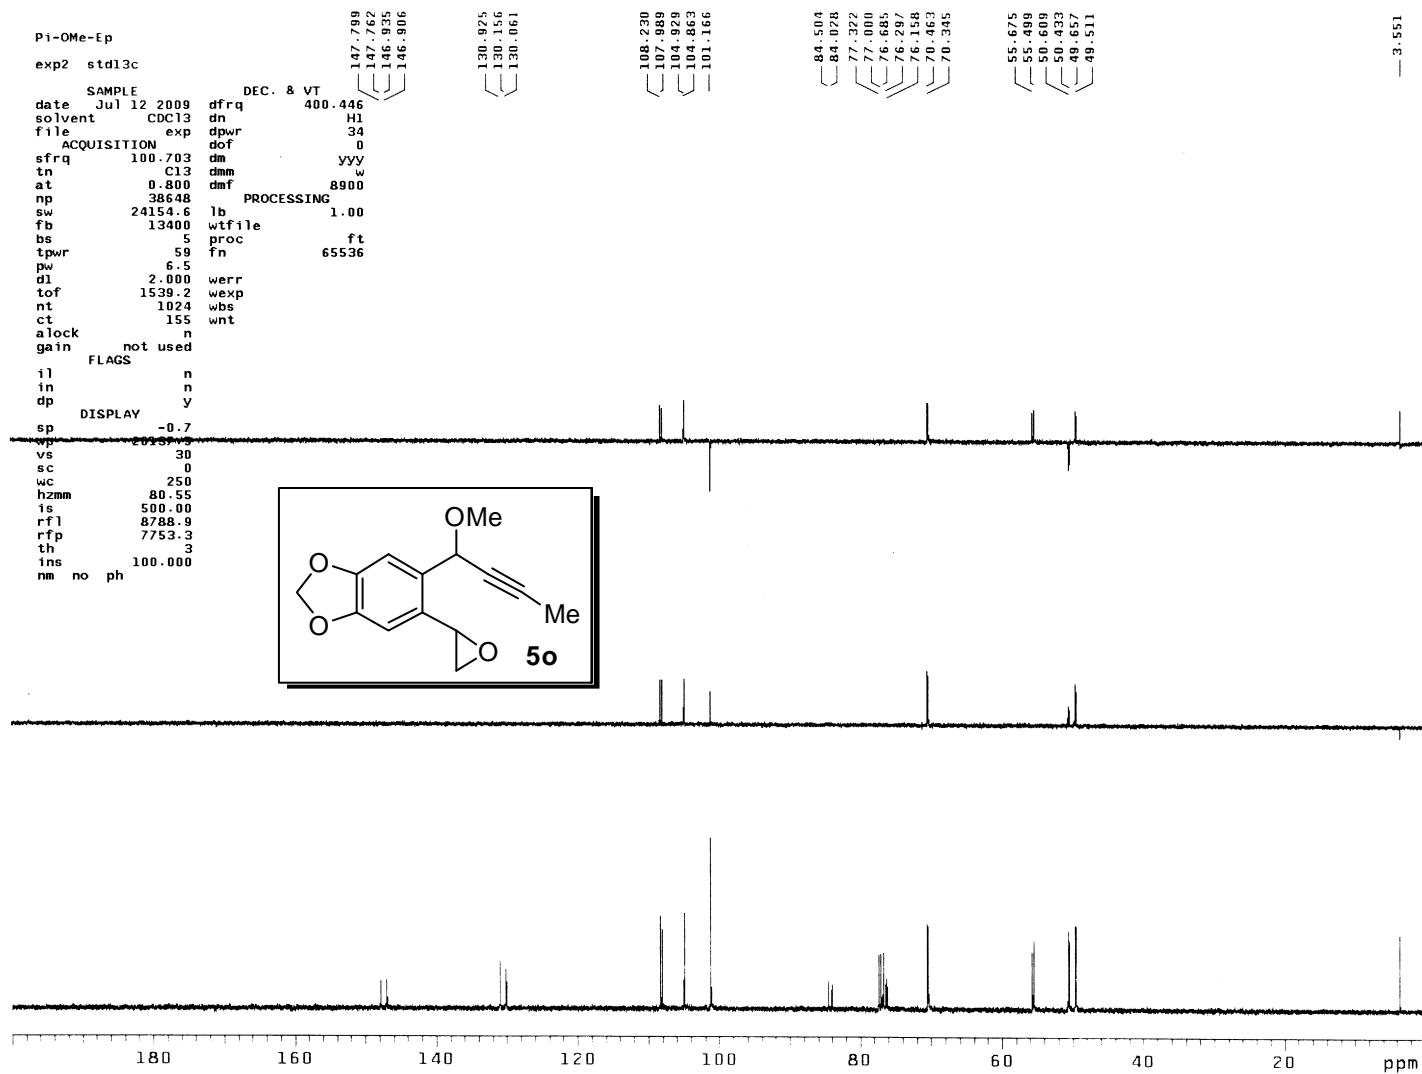

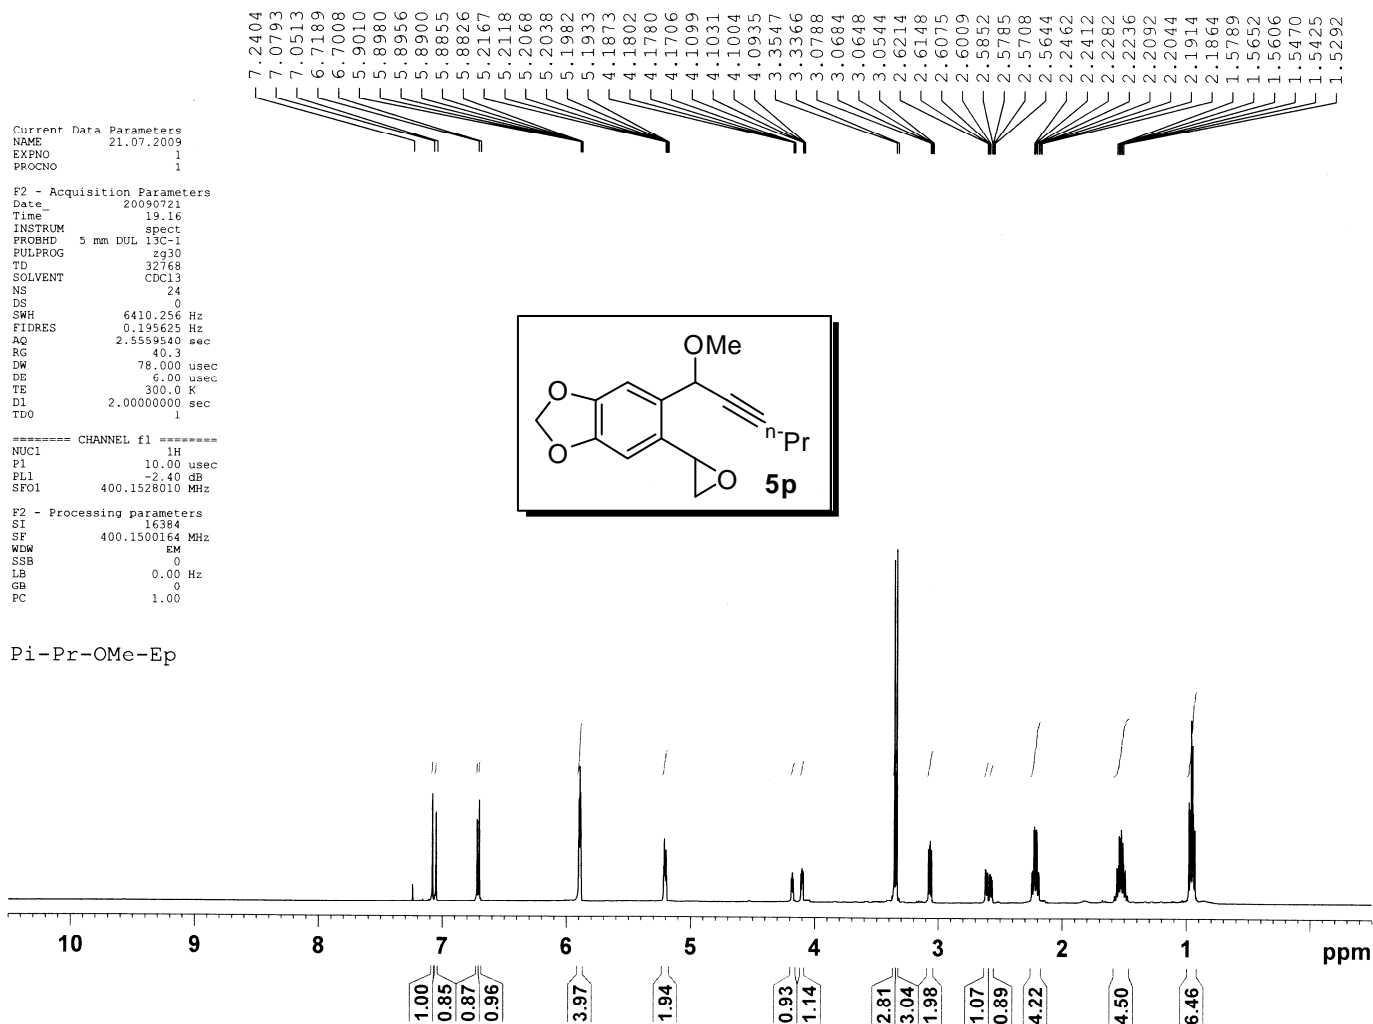



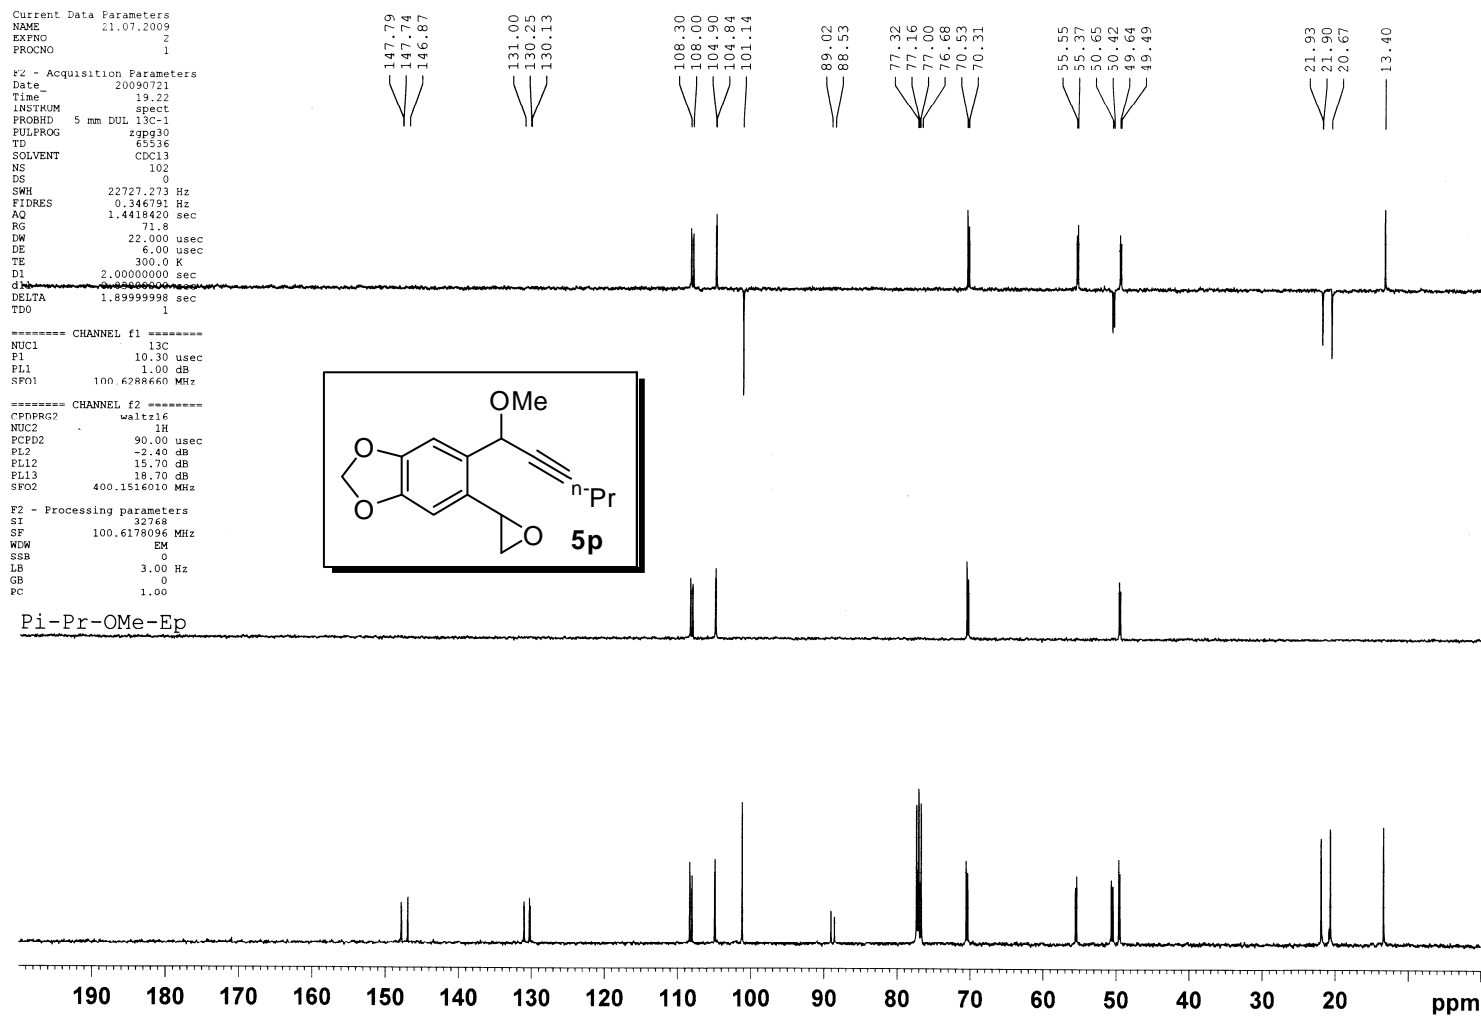

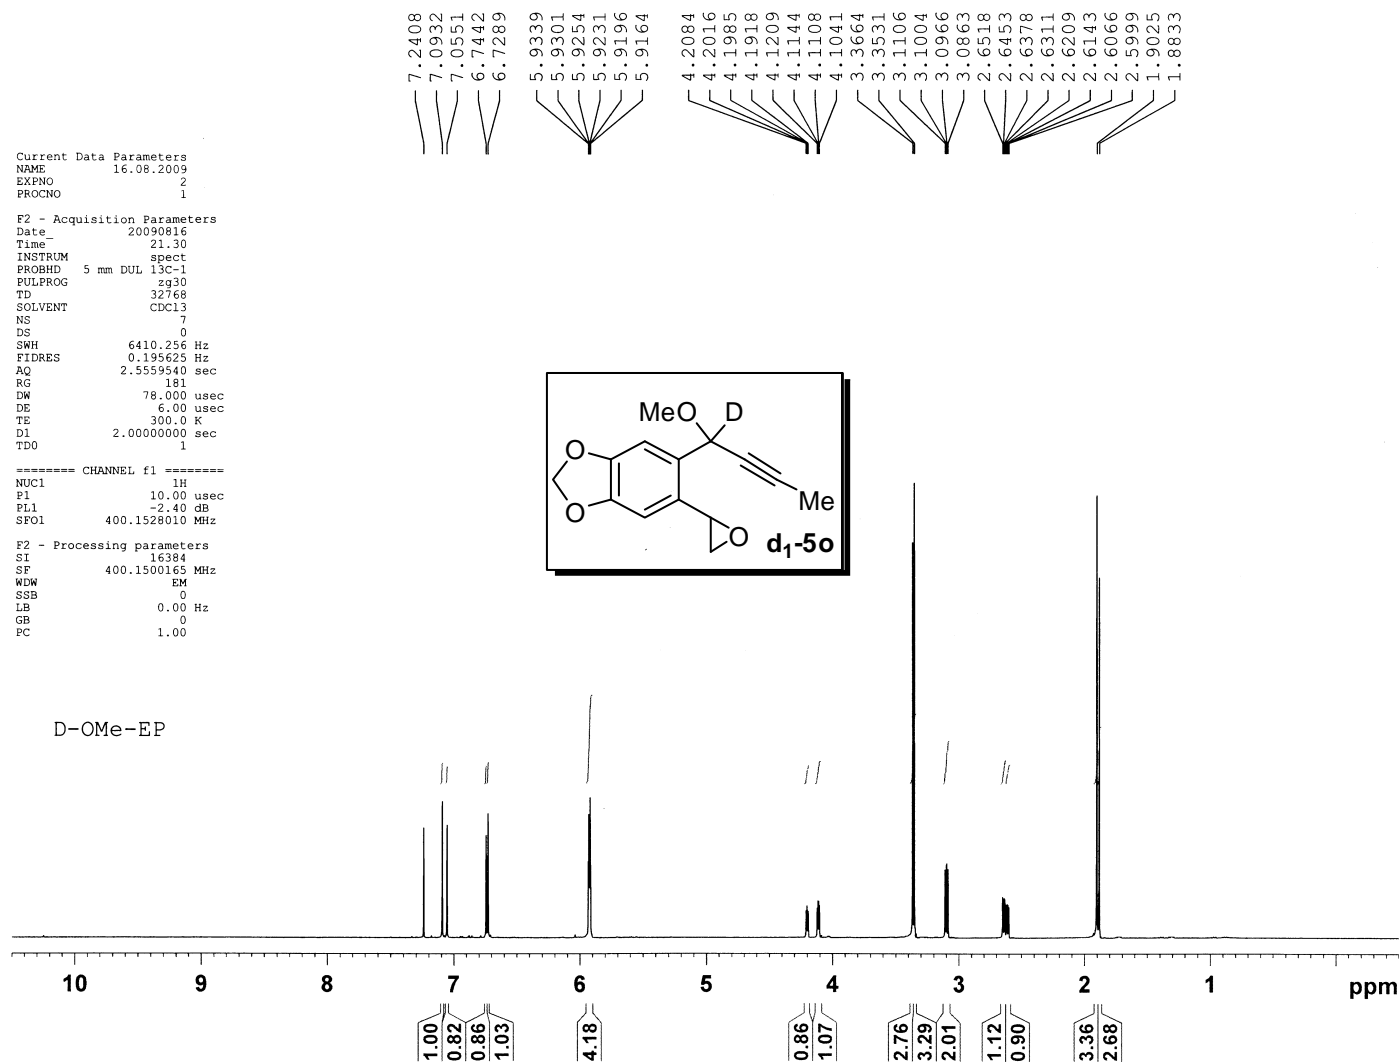

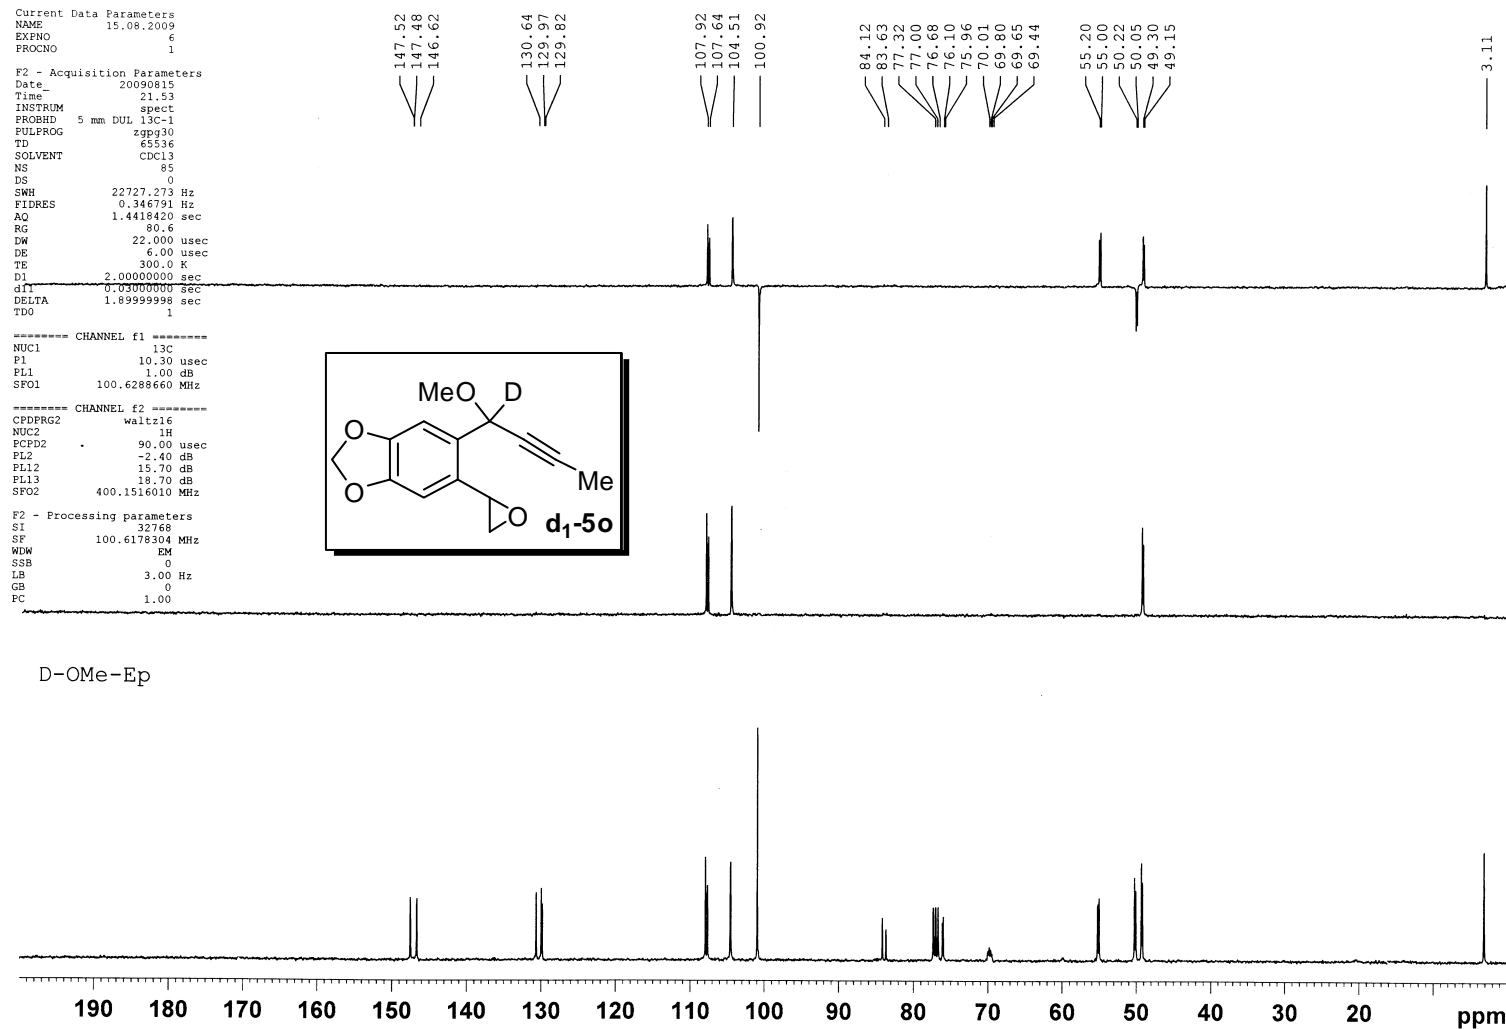

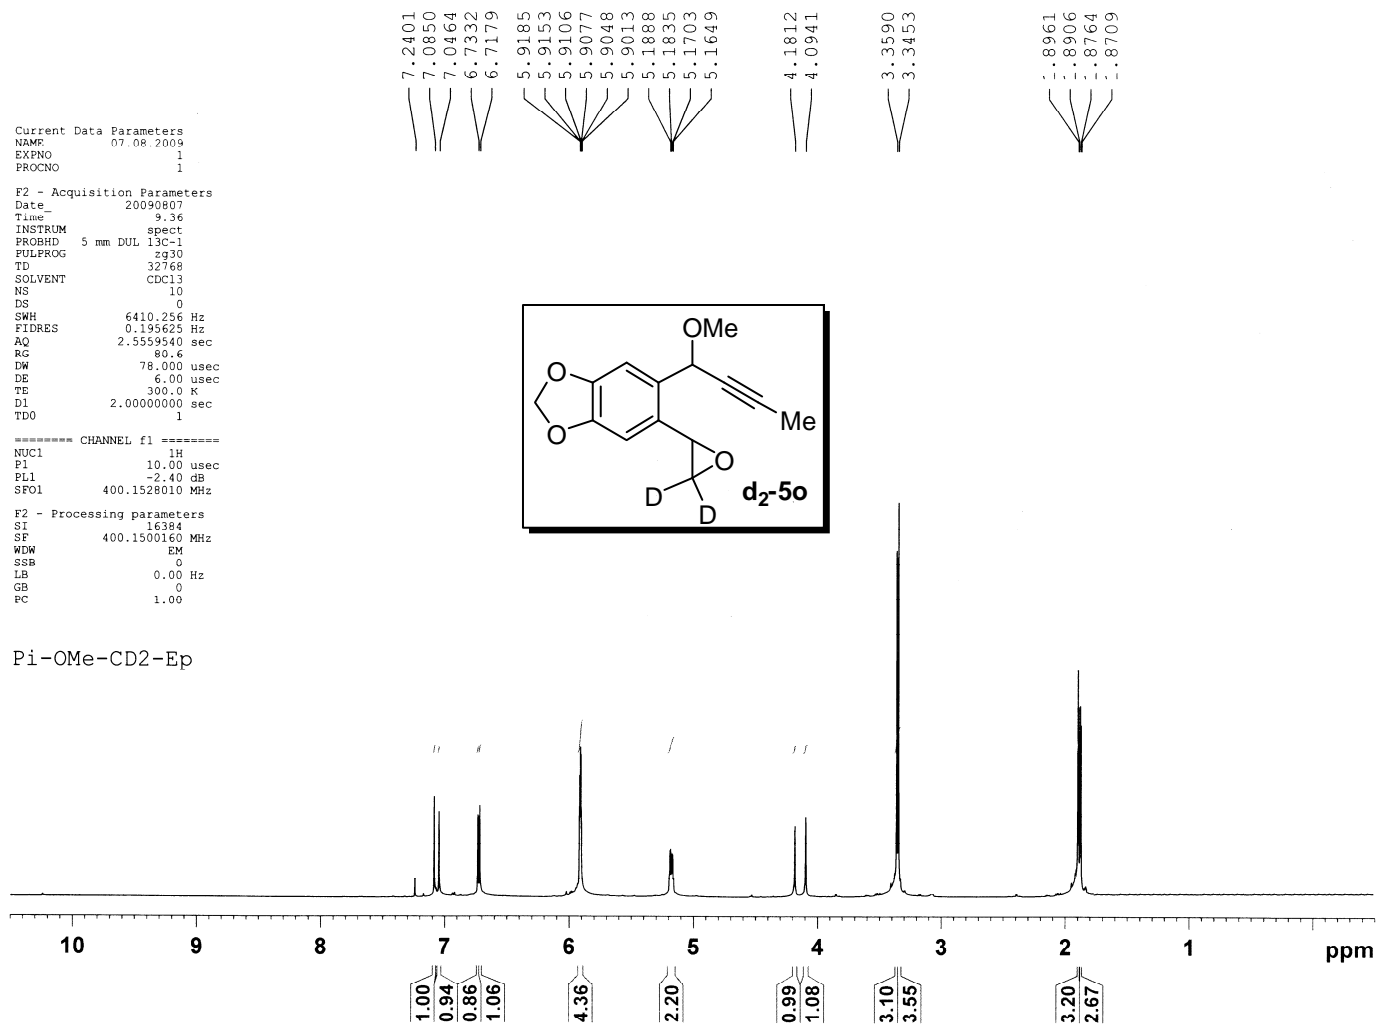

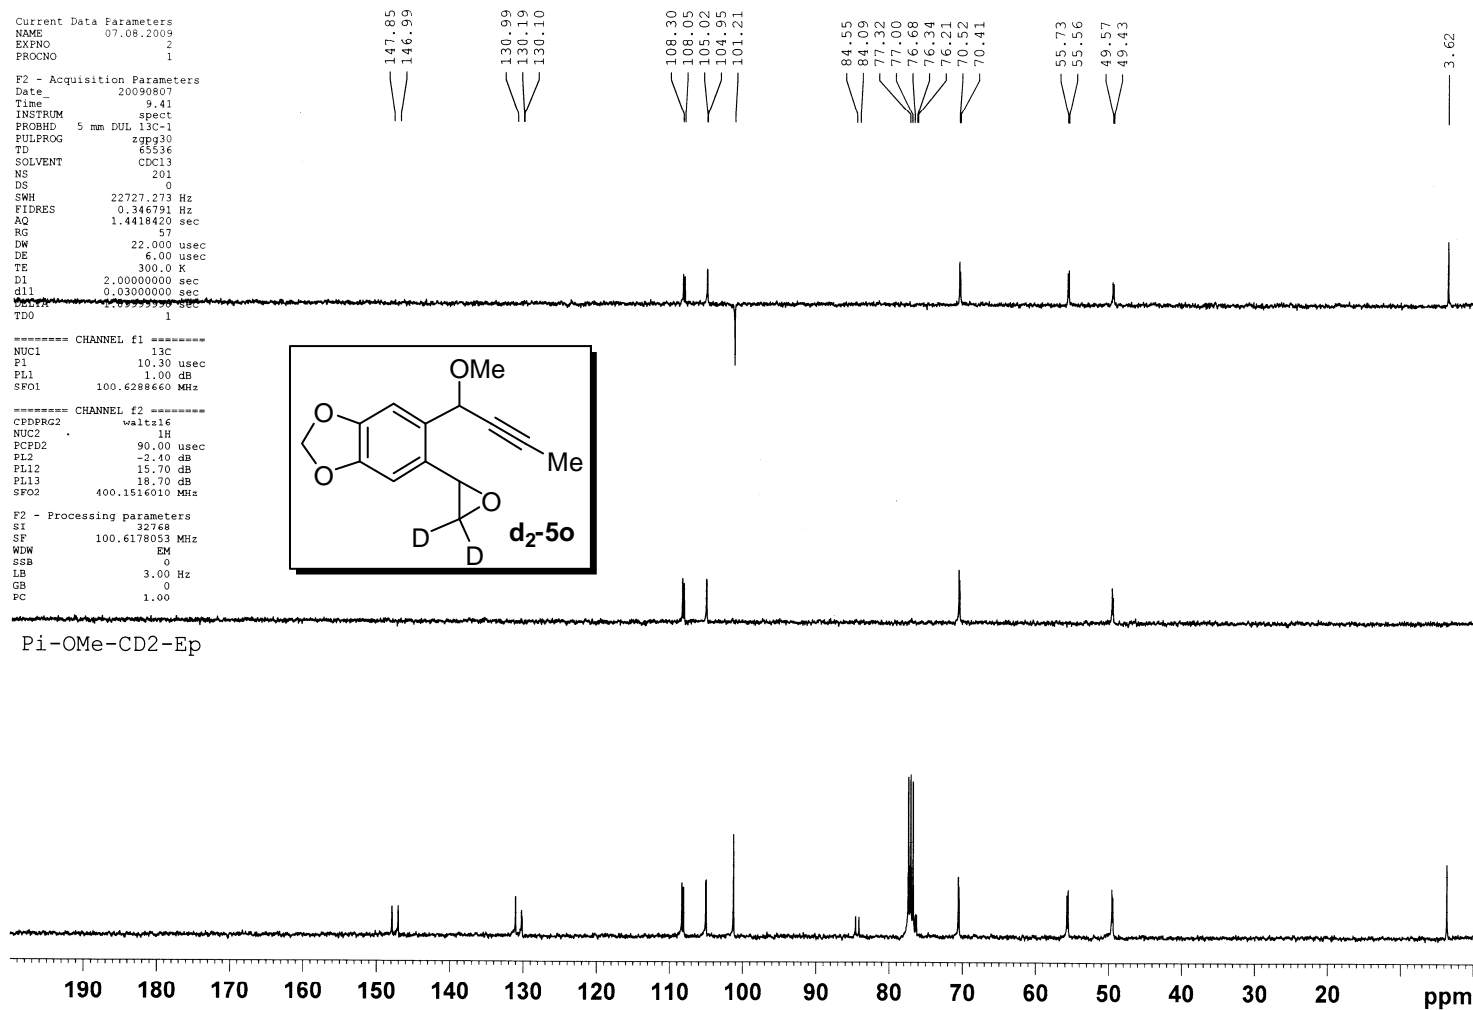

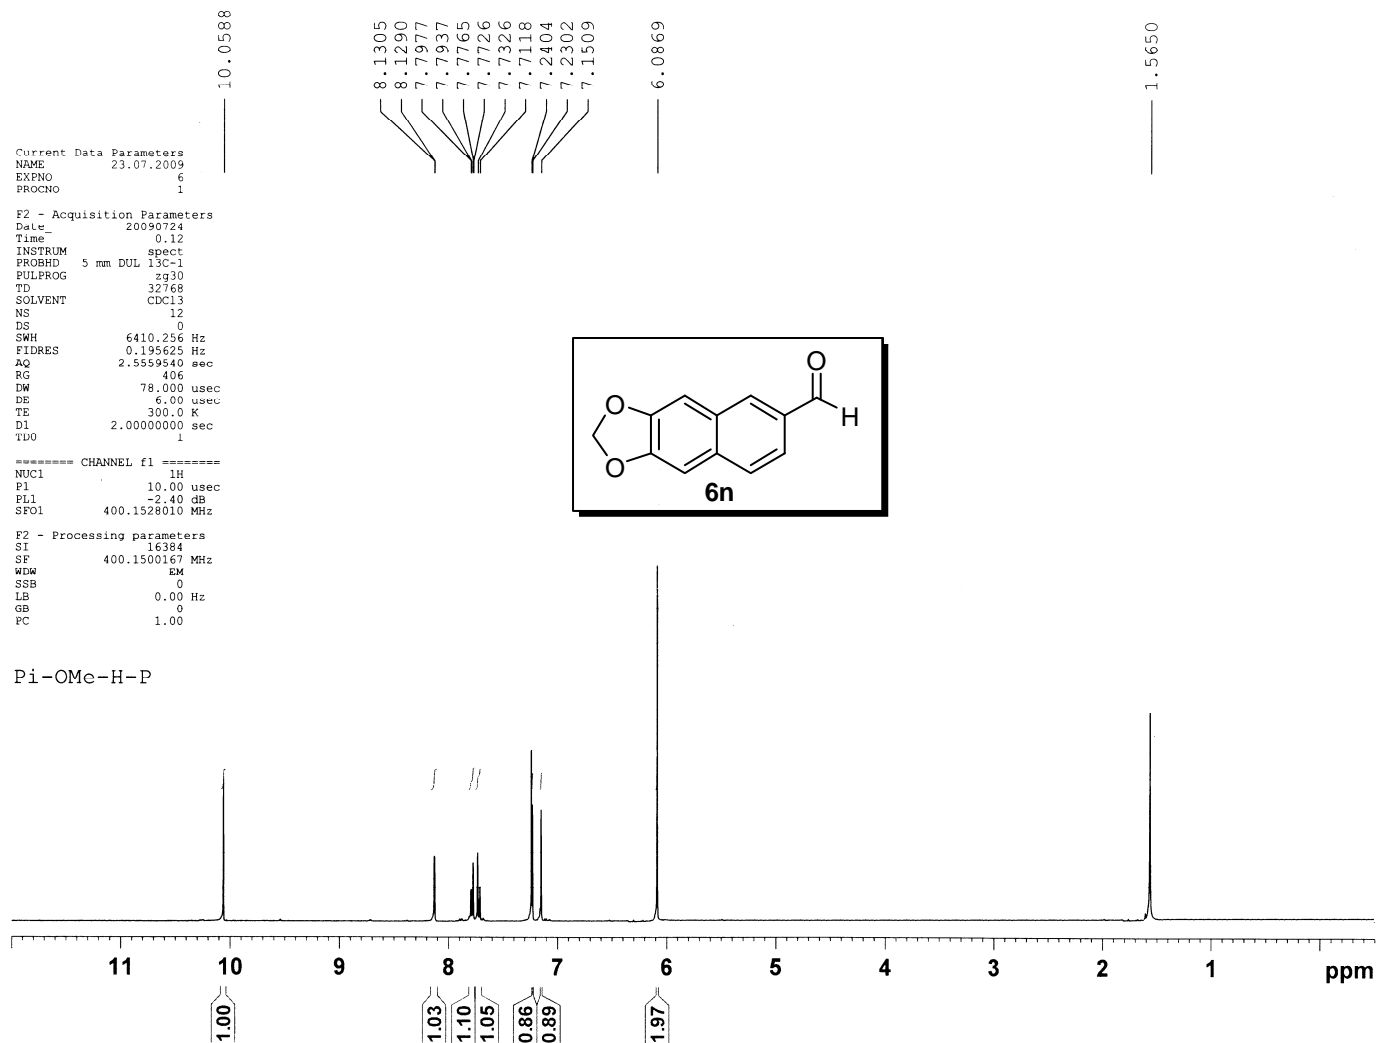

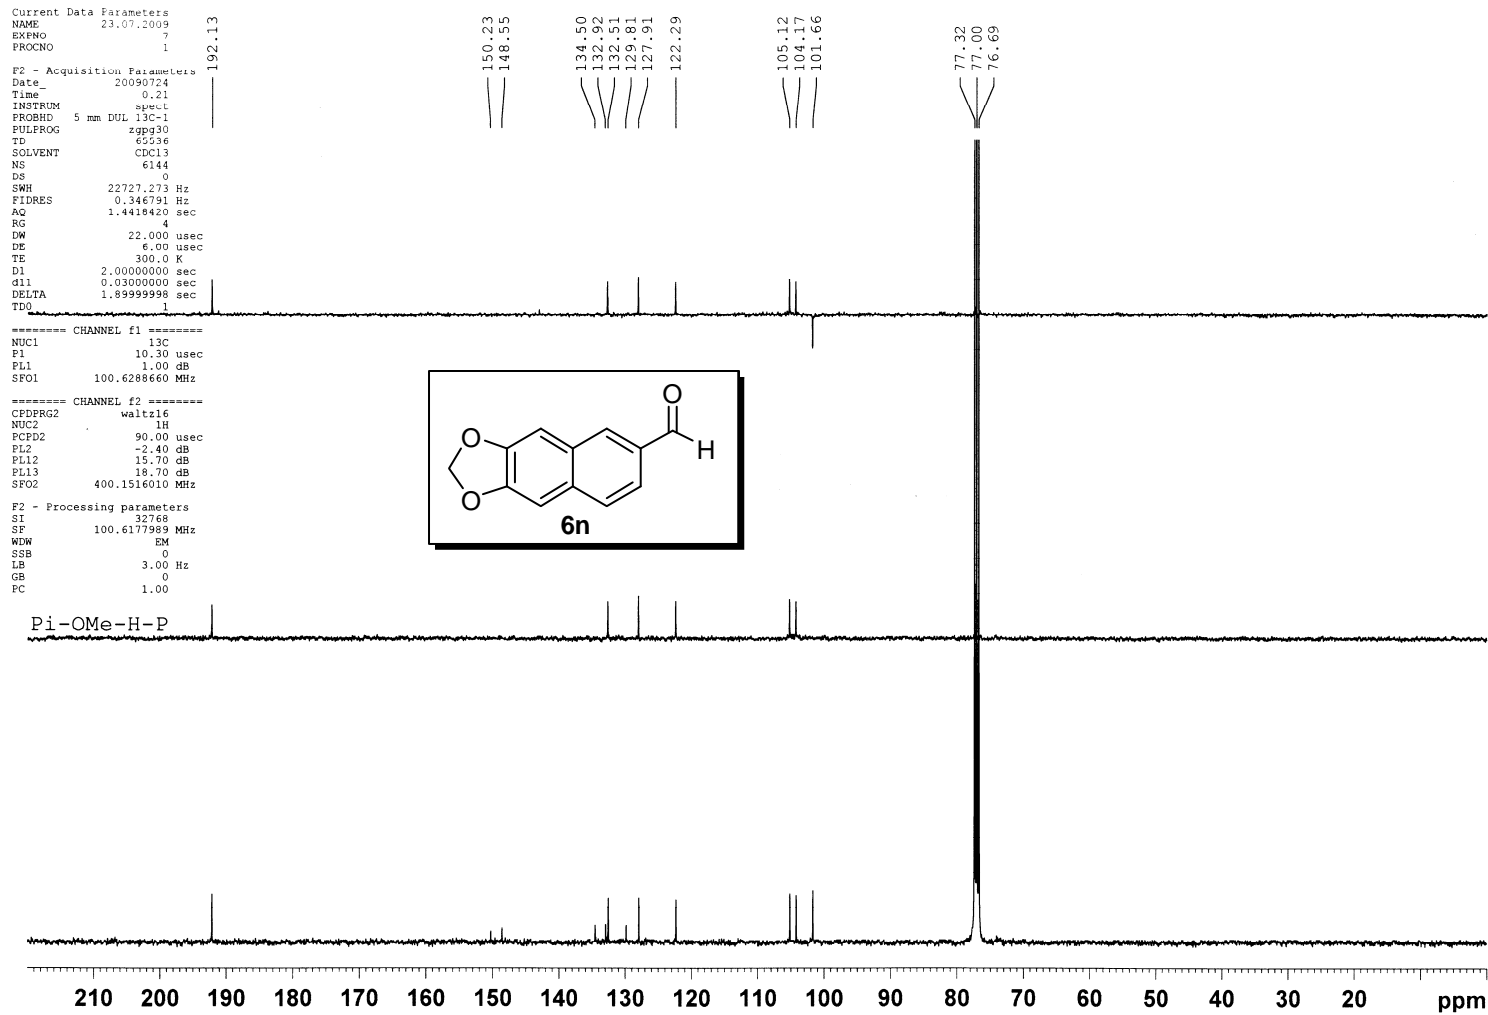

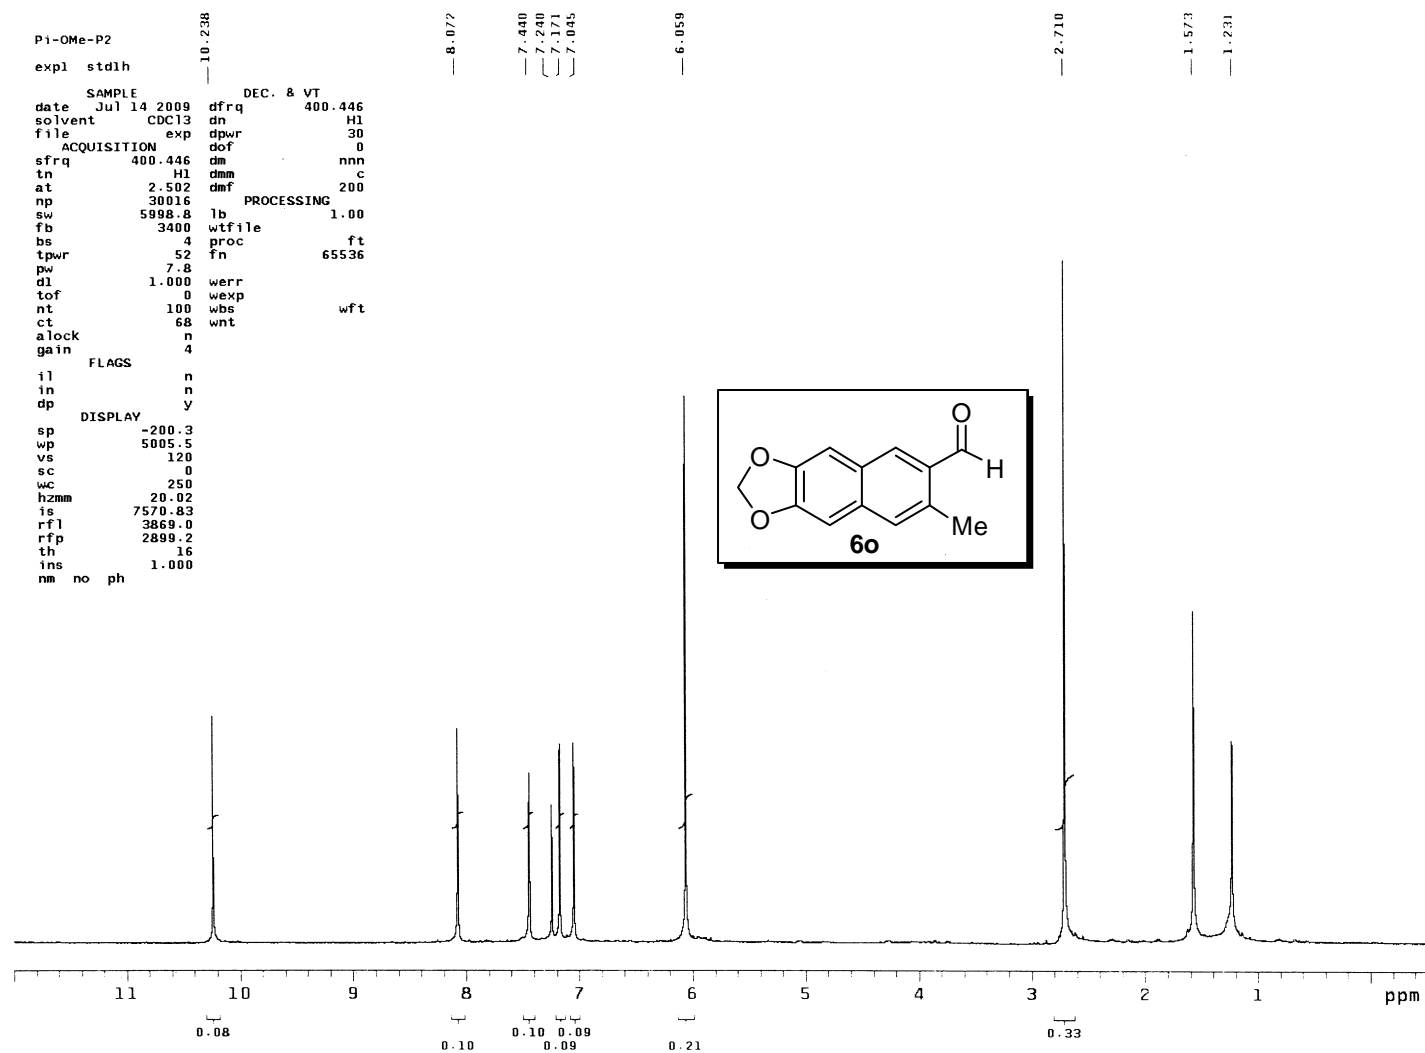



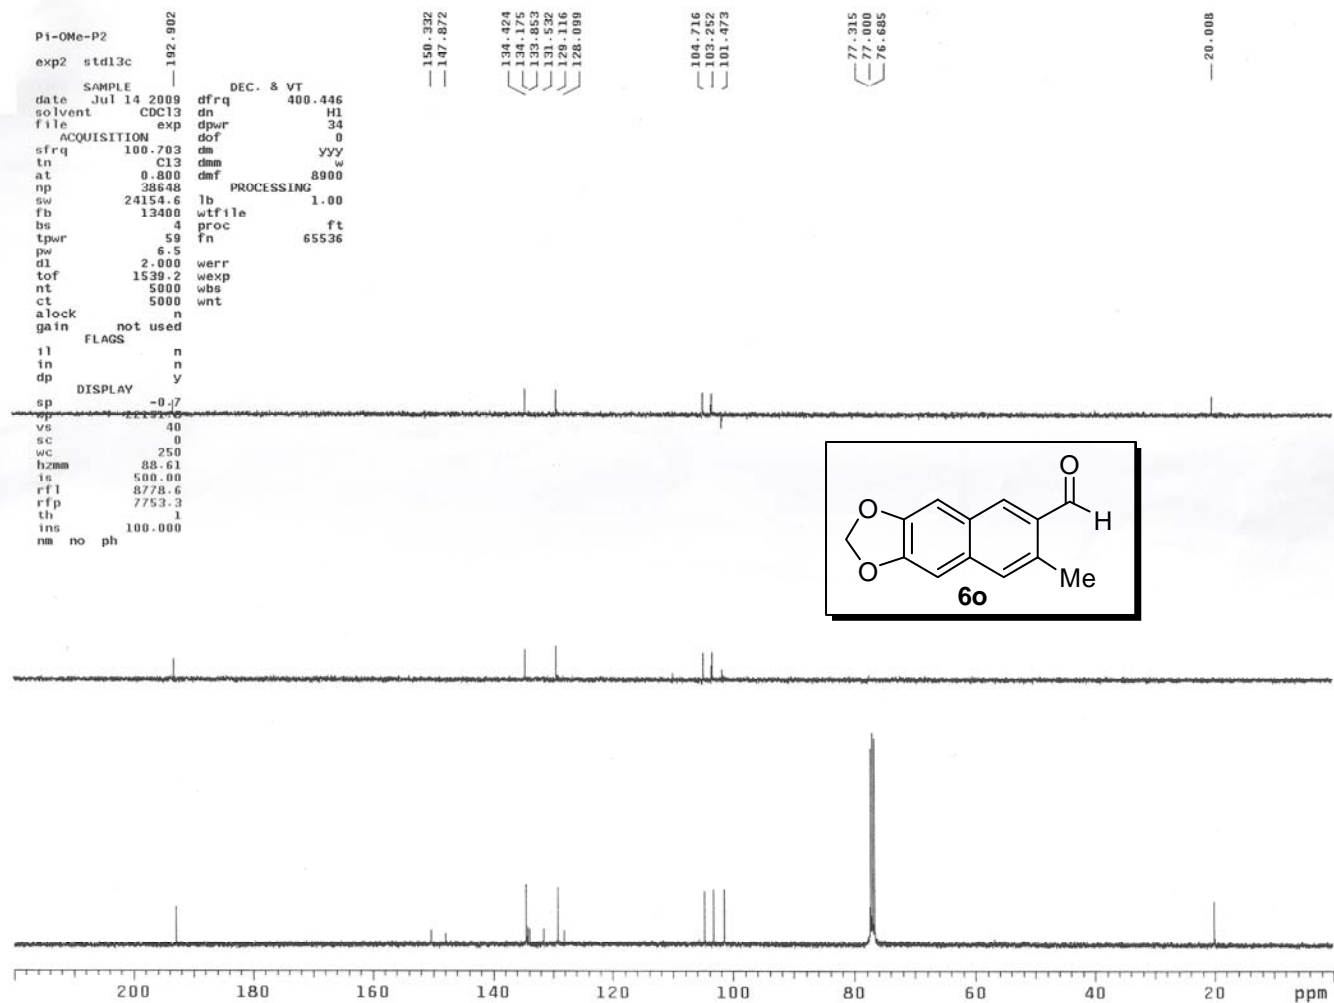

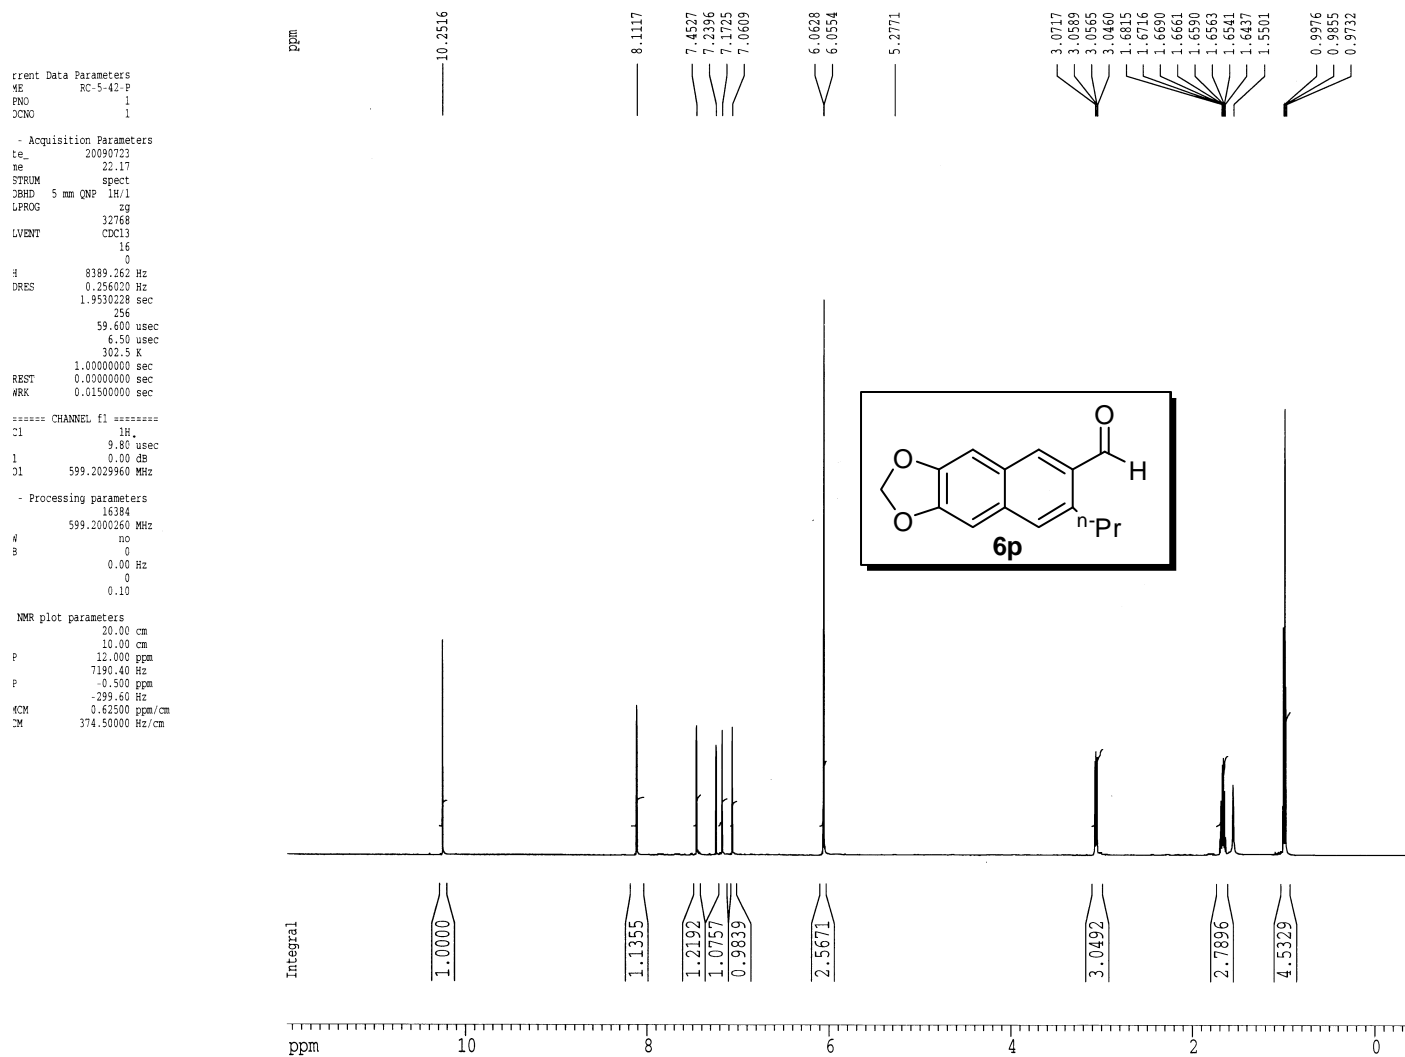

```

Current Data Parameters
ME RC-5-42-P
FWD 1
OCND 1

- Acquisition Parameters
fe_ 20090723
me 12.20
STRUM spec
OBHD 5 mm QNP 1H/1
ILPROG zgpg
32768
NUC1 13C
F1 101.25
F2 101.25
M 45045.047 Hz
DRES 1.374666 Hz
1 0.3637748 sec
1 1024
1 11.100 usec
1 6.50 usec
1 302.7 K
1 3.50000000 sec
1 0.03000000 sec
1 3.40000010 sec
REST 0.00000000 sec
WRK 0.01500000 sec

===== CHANNEL f1 =====
IC1 13C
1 4.50 usec
1 0.00 dB
V1 150.6855336 MHz

===== CHANNEL f2 =====
DPRG2 waltz16
IC2 1H
PD2 92.00 usec
2 120.00 dB
12 11.30 dB
13 14.00 dB
V2 599.2029960 MHz

- Processing parameters
65536
150.6689620 MHz
M BM
1 0
1 3.00 Hz
1 0
1 0.50

- NMR plot parameters
1 20.00 cm
1 20.00 cm
P 200.000 ppm
1P 30133.79 Hz
1P -5.000 ppm
1 753.34 Hz
MCM 10.25000 ppm/cm
CM 1544.35693 Hz/cm

```

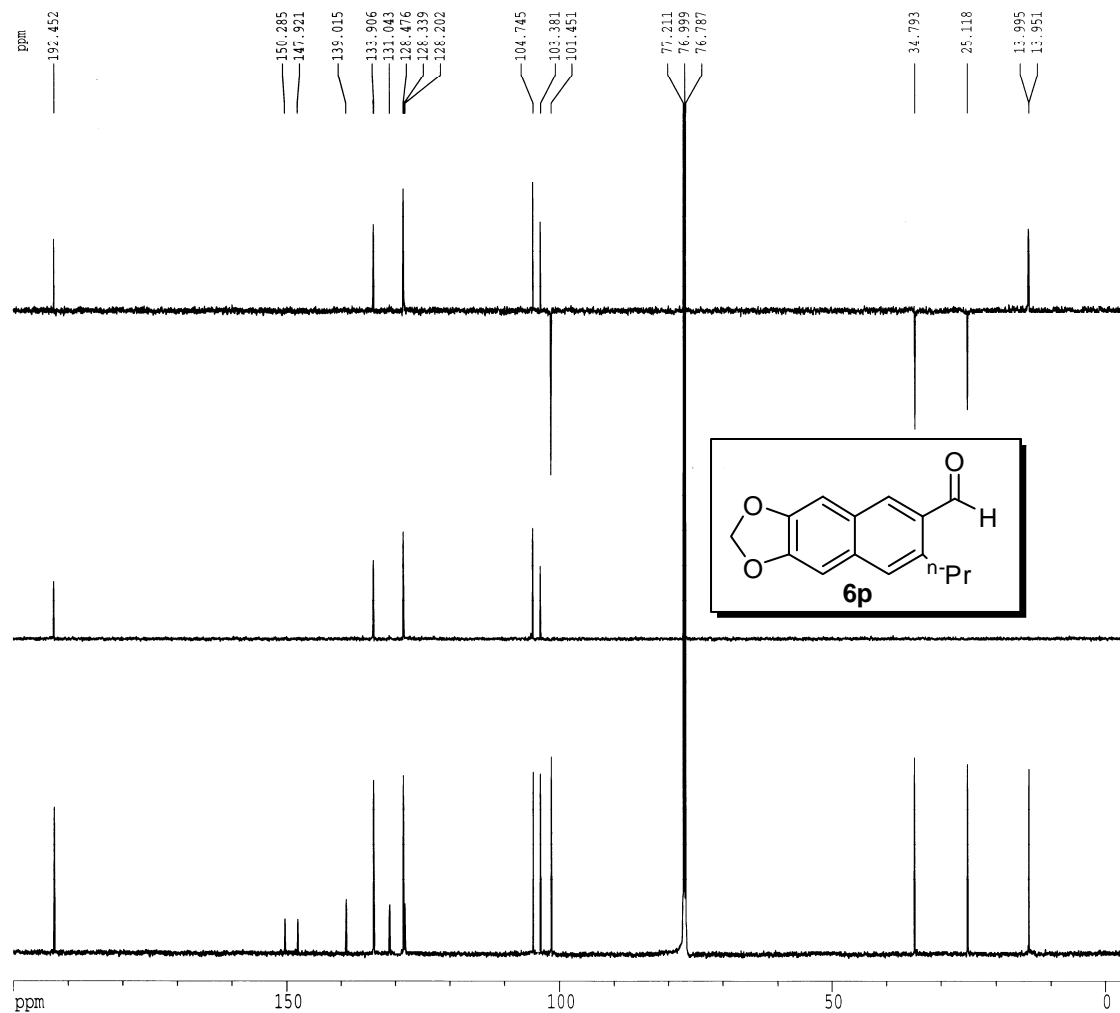

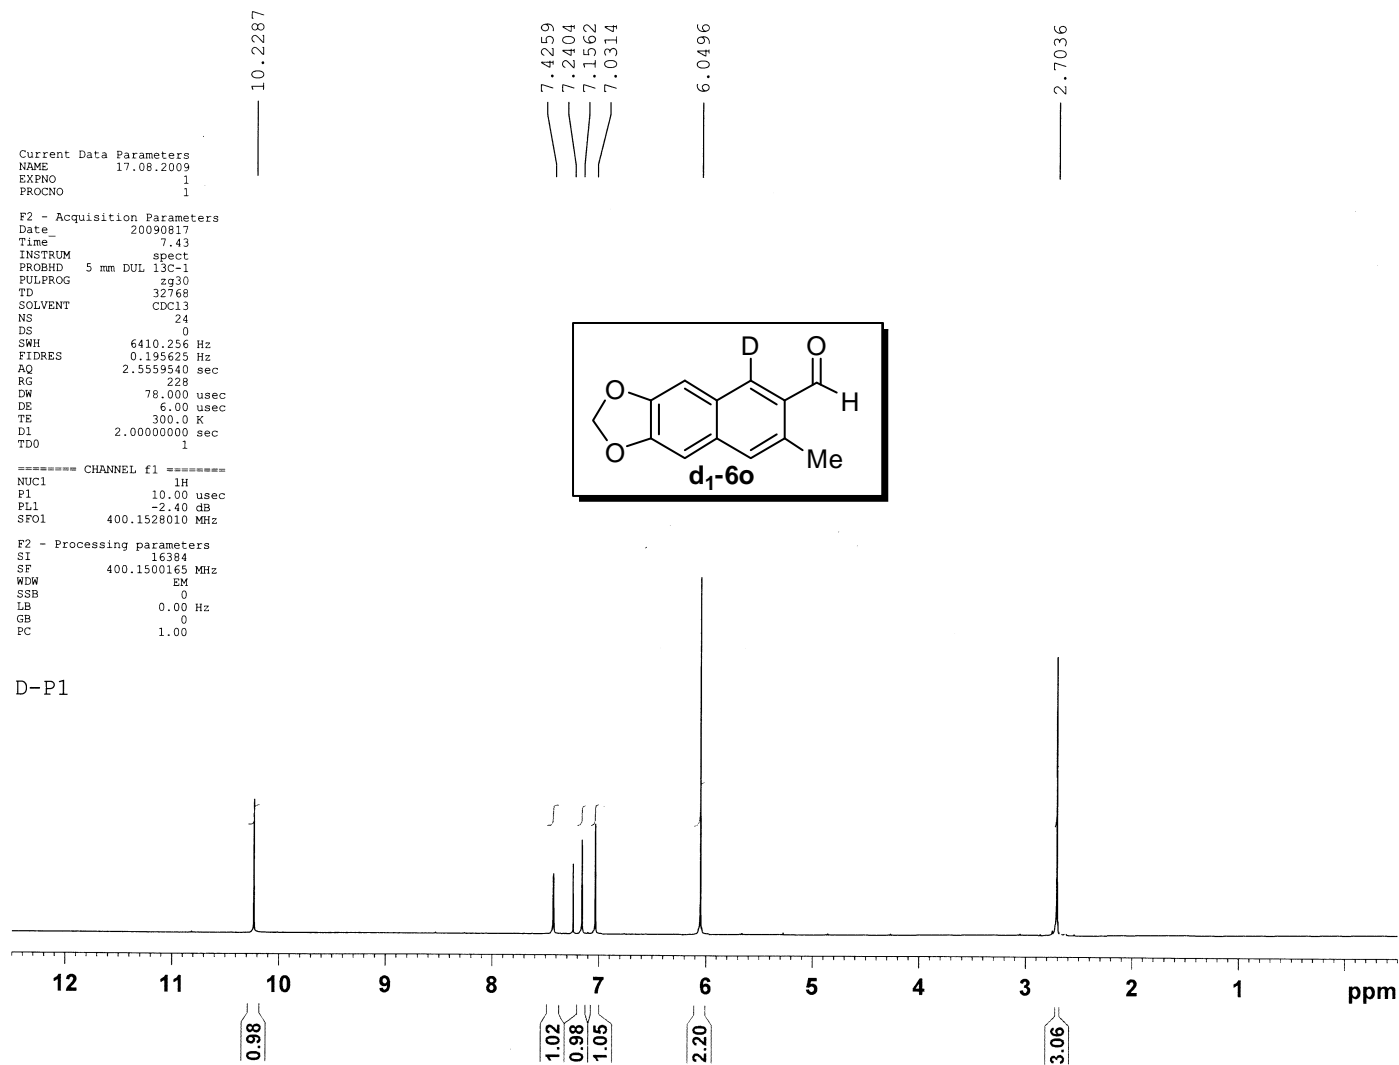

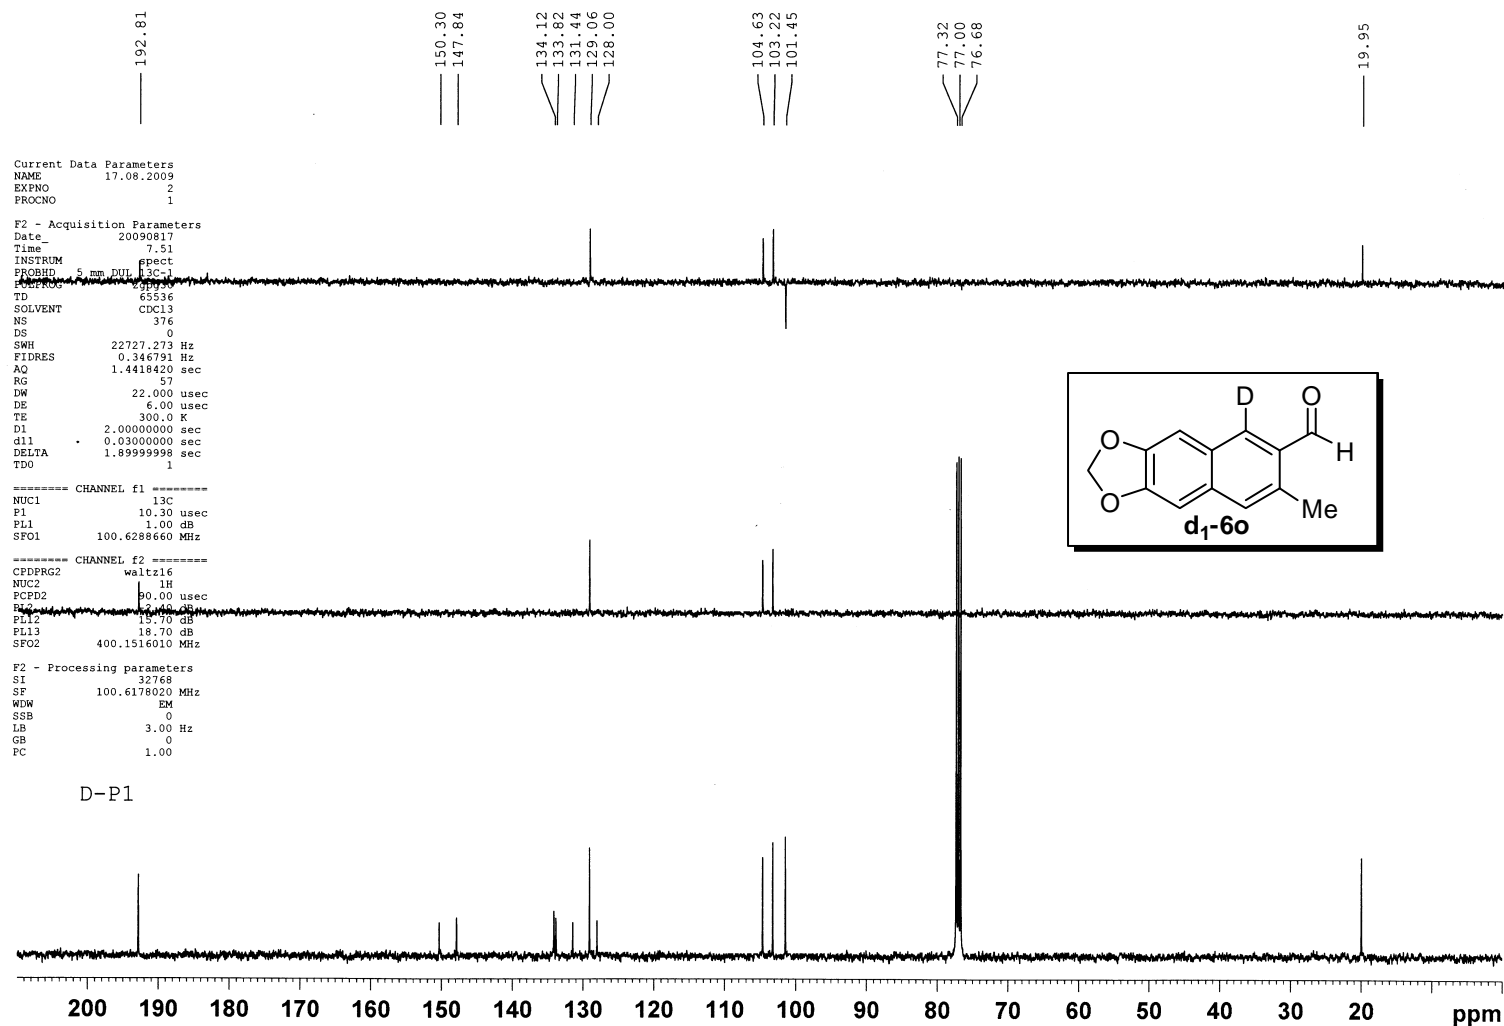

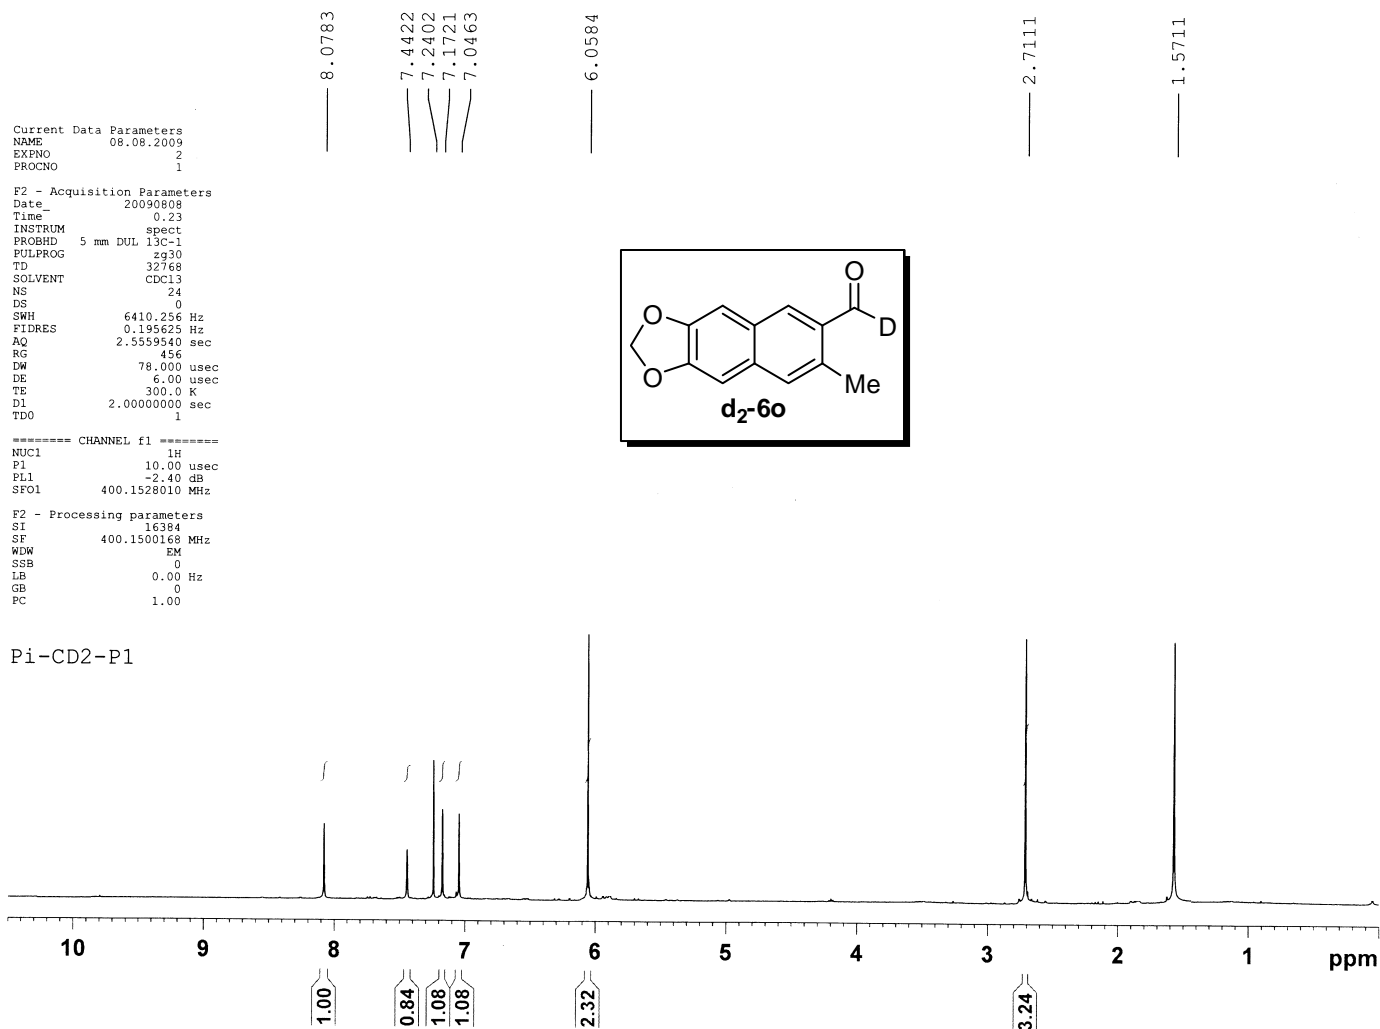

```

Current Data Parameters
=====
F1  RCS-54-P1
PNO  2
JCNO  1

- Acquisition Parameters
=====
re_  20090807
ne  16.37
STRUM  spect
SFO  5 mm QNP 1H/1
LPROG  zgpg
32768
LVENT  CDCl3
10240
0

f1  45045.047 Hz
DRBS  1.374666 Hz
0.3637748 sec
1024
11.100 usec
6.50 usec
302.5 K
3.50000000 sec
1  0.03000000 sec
LTA  3.40000010 sec
REST  0.00000000 sec
KRC  0.01500000 sec

===== CHANNEL f1 =====
C1  13C
4.50 usec
1  0.00 dB
O1  150.6855336 MHz

===== CHANNEL f2 =====
DPRG2  waltz16
C2  1H
PD2  92.00 usec
2  120.00 dB
12  11.30 dB
13  14.00 dB
O2  599.2029960 MHz

- Processing parameters
=====
65536
150.6689606 MHz
W  EN
B  0
3.00 Hz
0
0.50

===== NMR plot parameters =====
20.00 cm
40.00 cm
P  200.000 ppm
30133.79 Hz
P  -5.000 ppm
-753.34 Hz
MCM  10.25000 ppm/cm
CM  1544.35693 Hz/cm

```

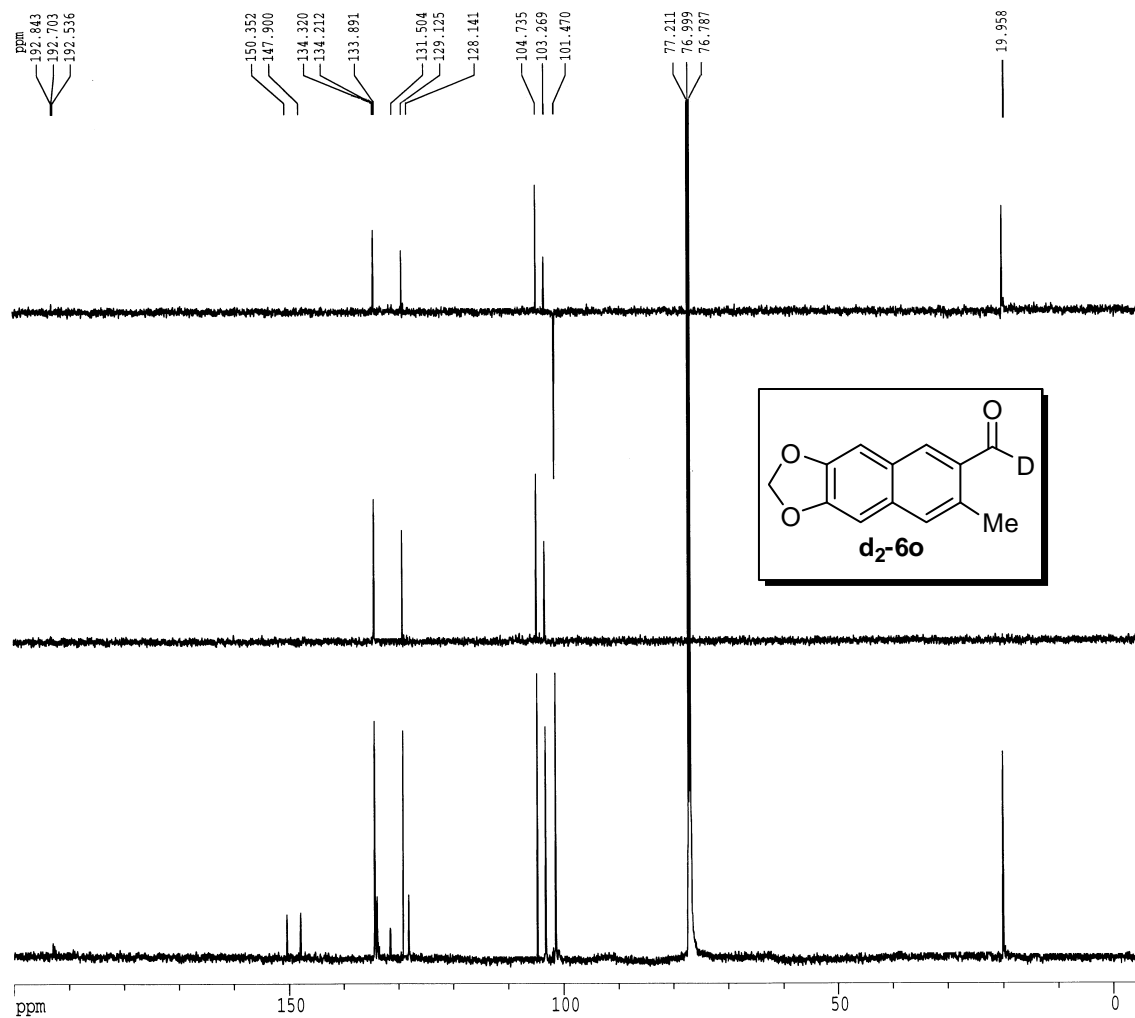

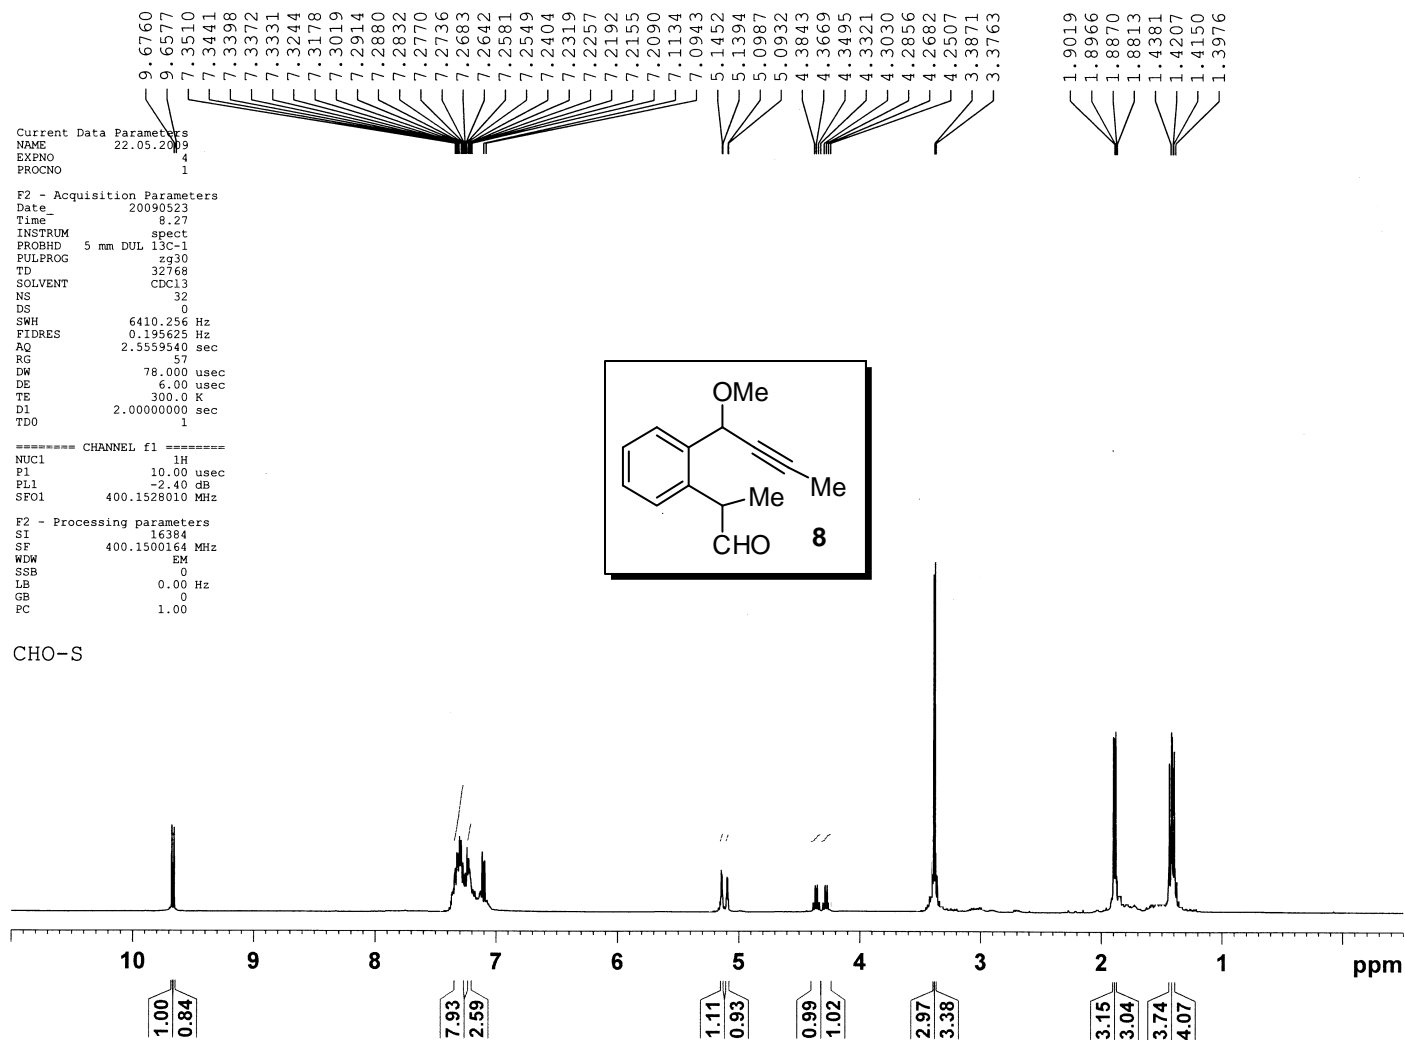



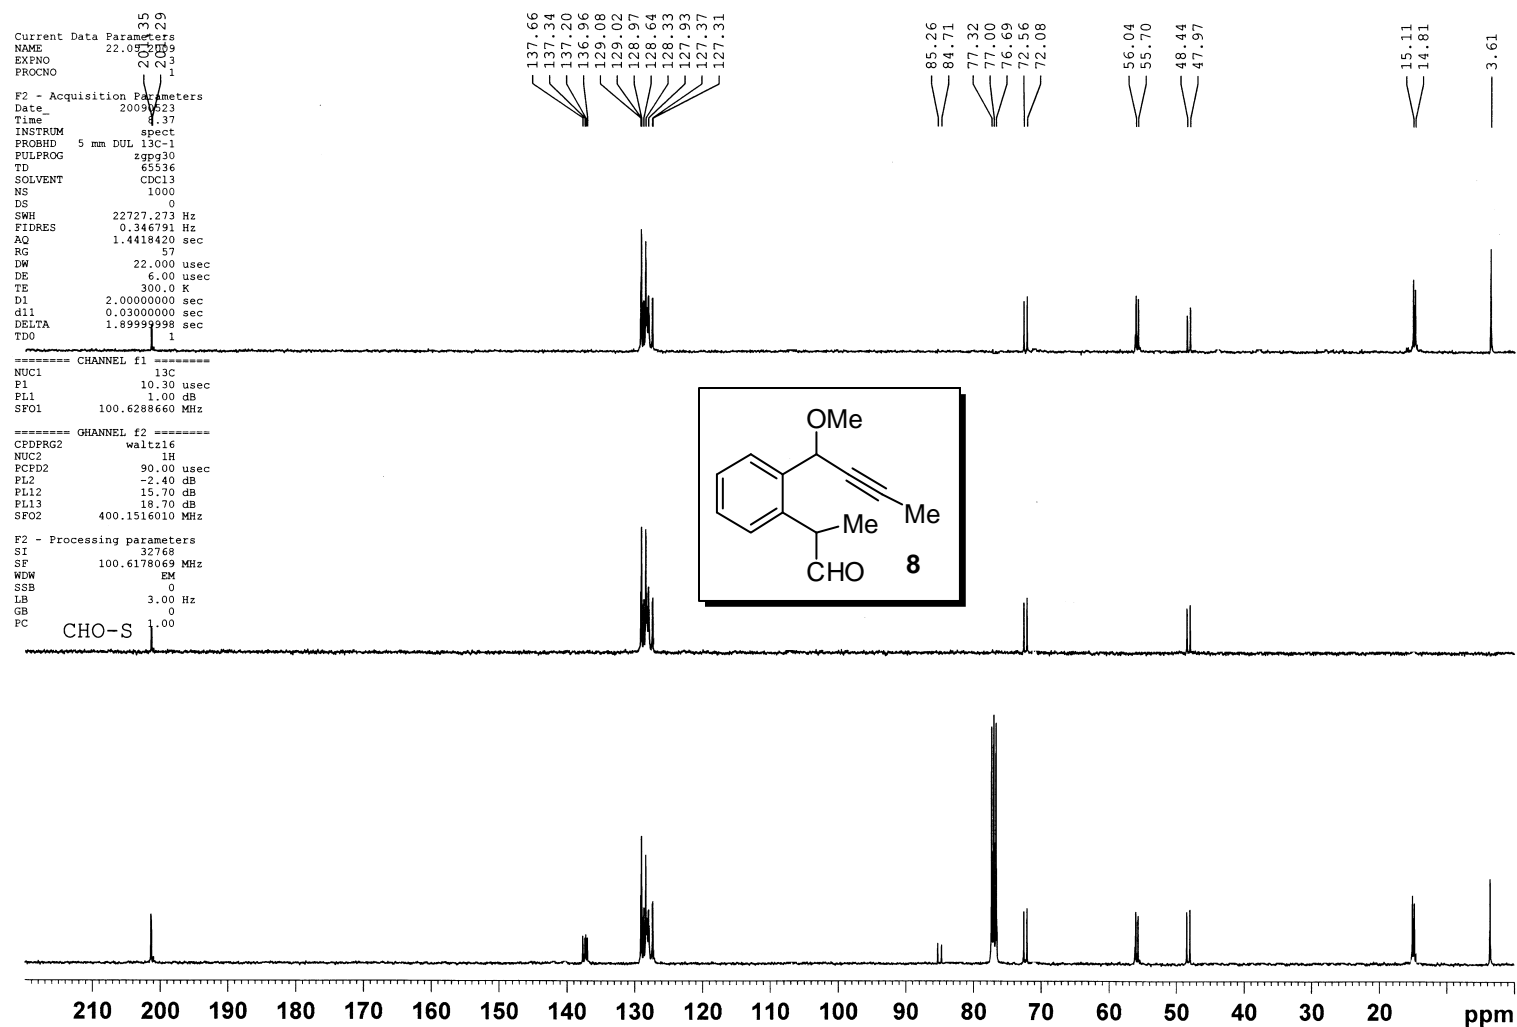

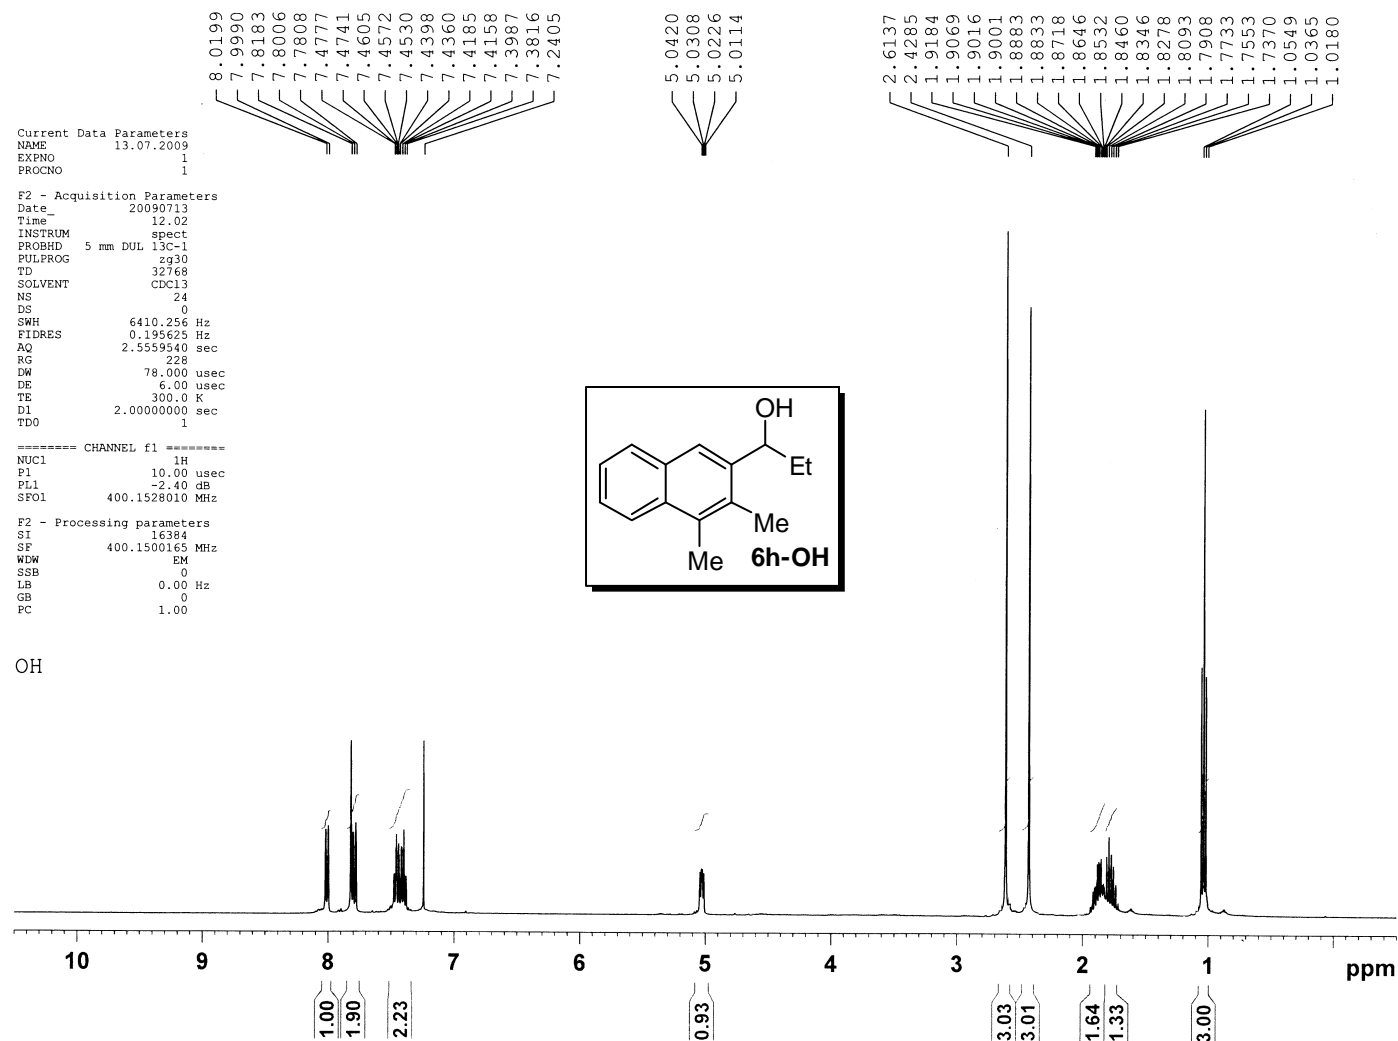

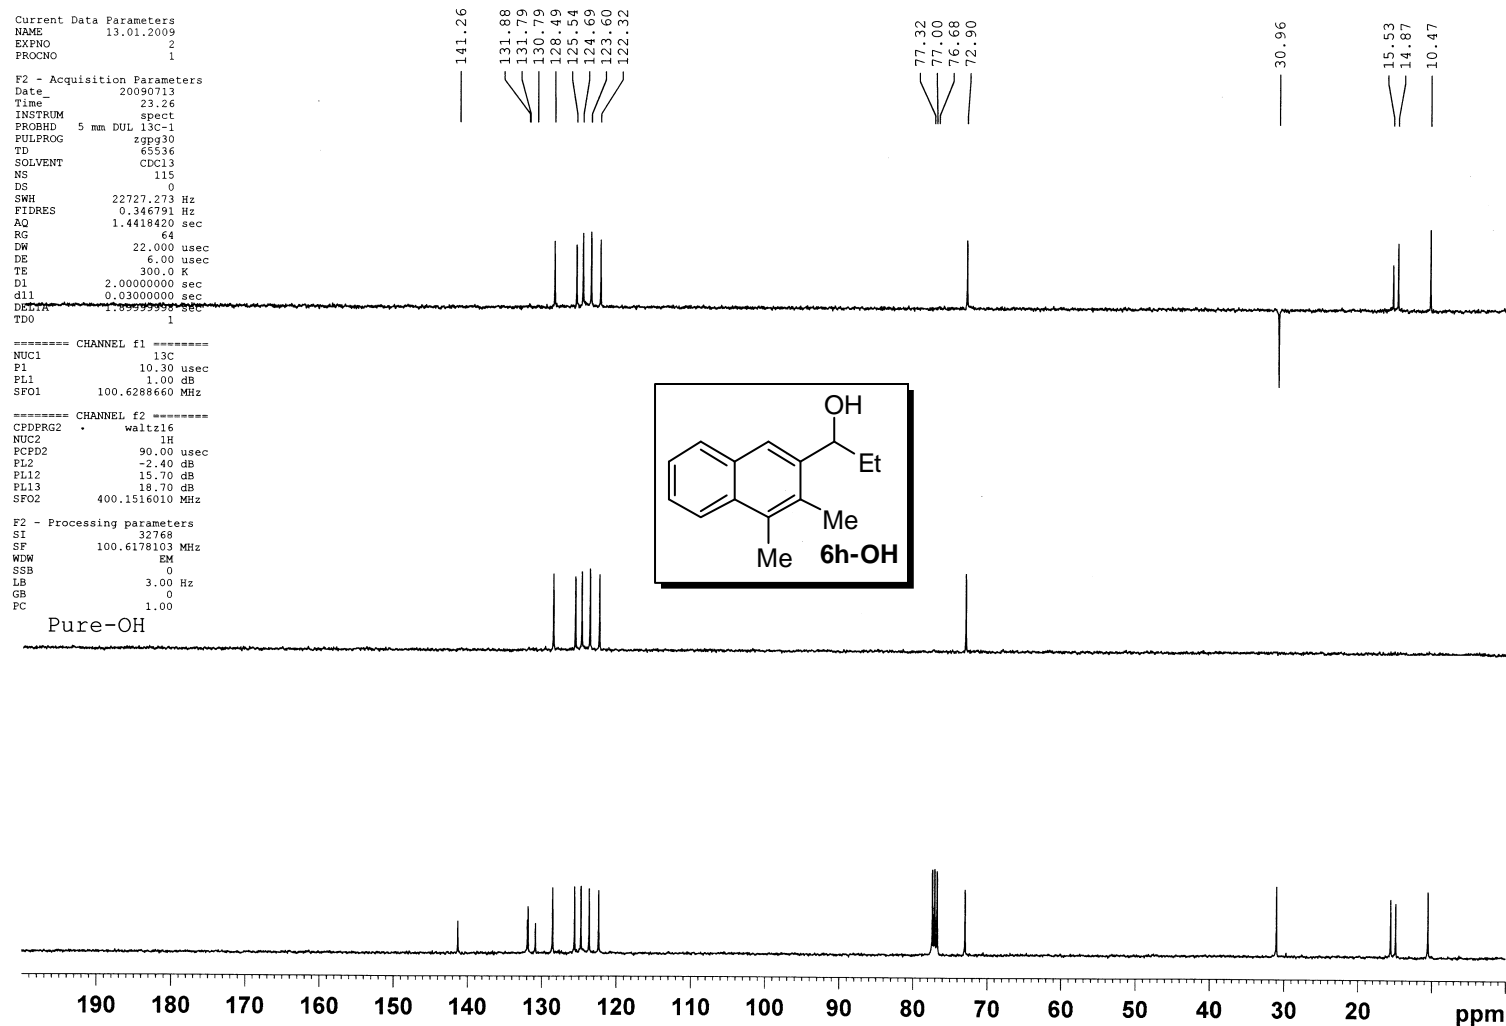

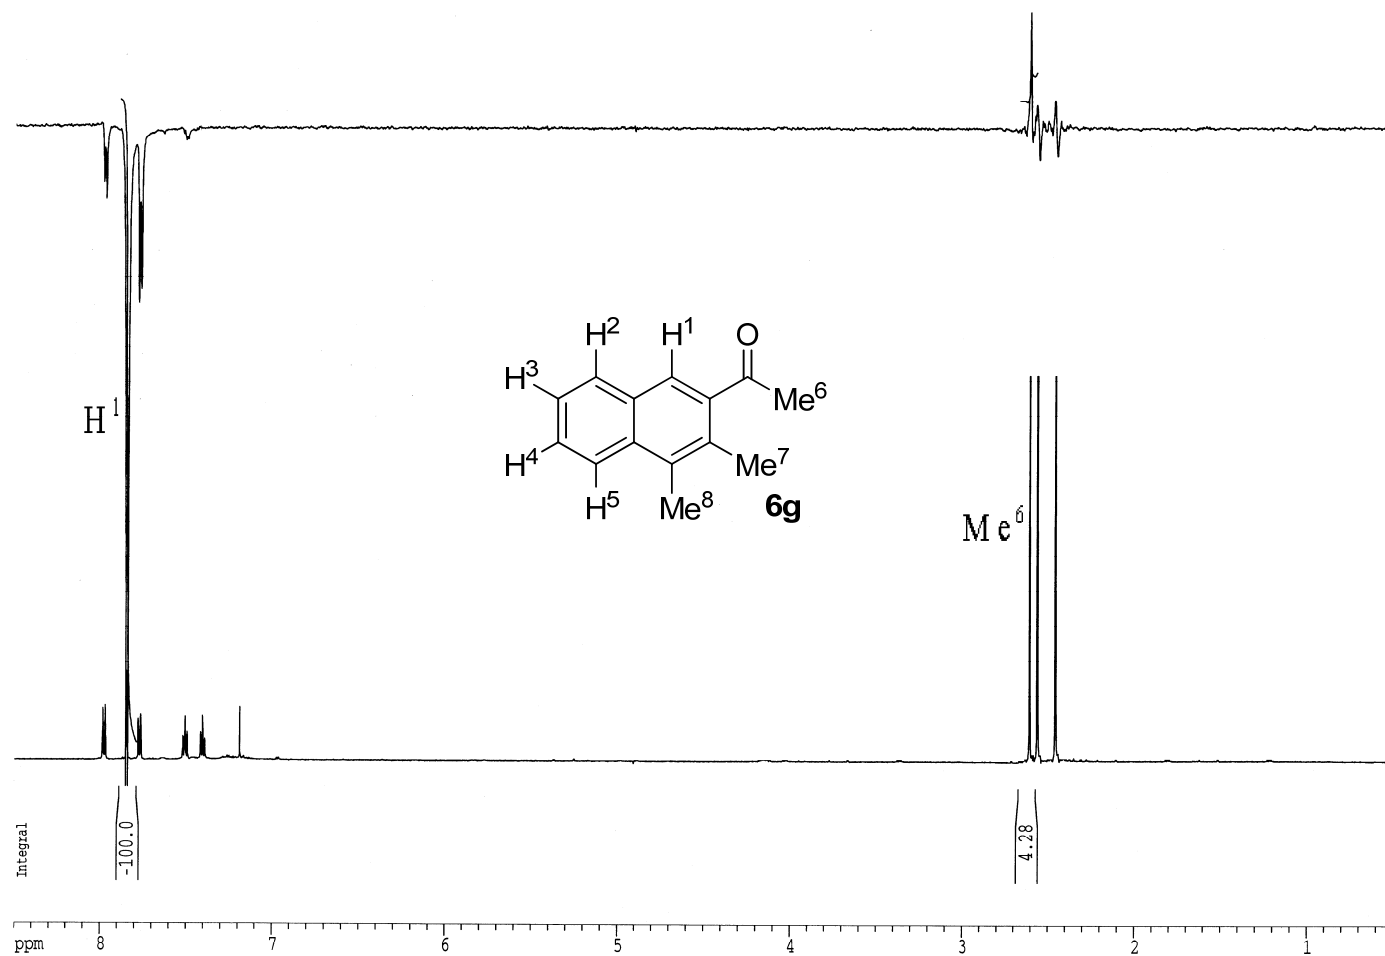

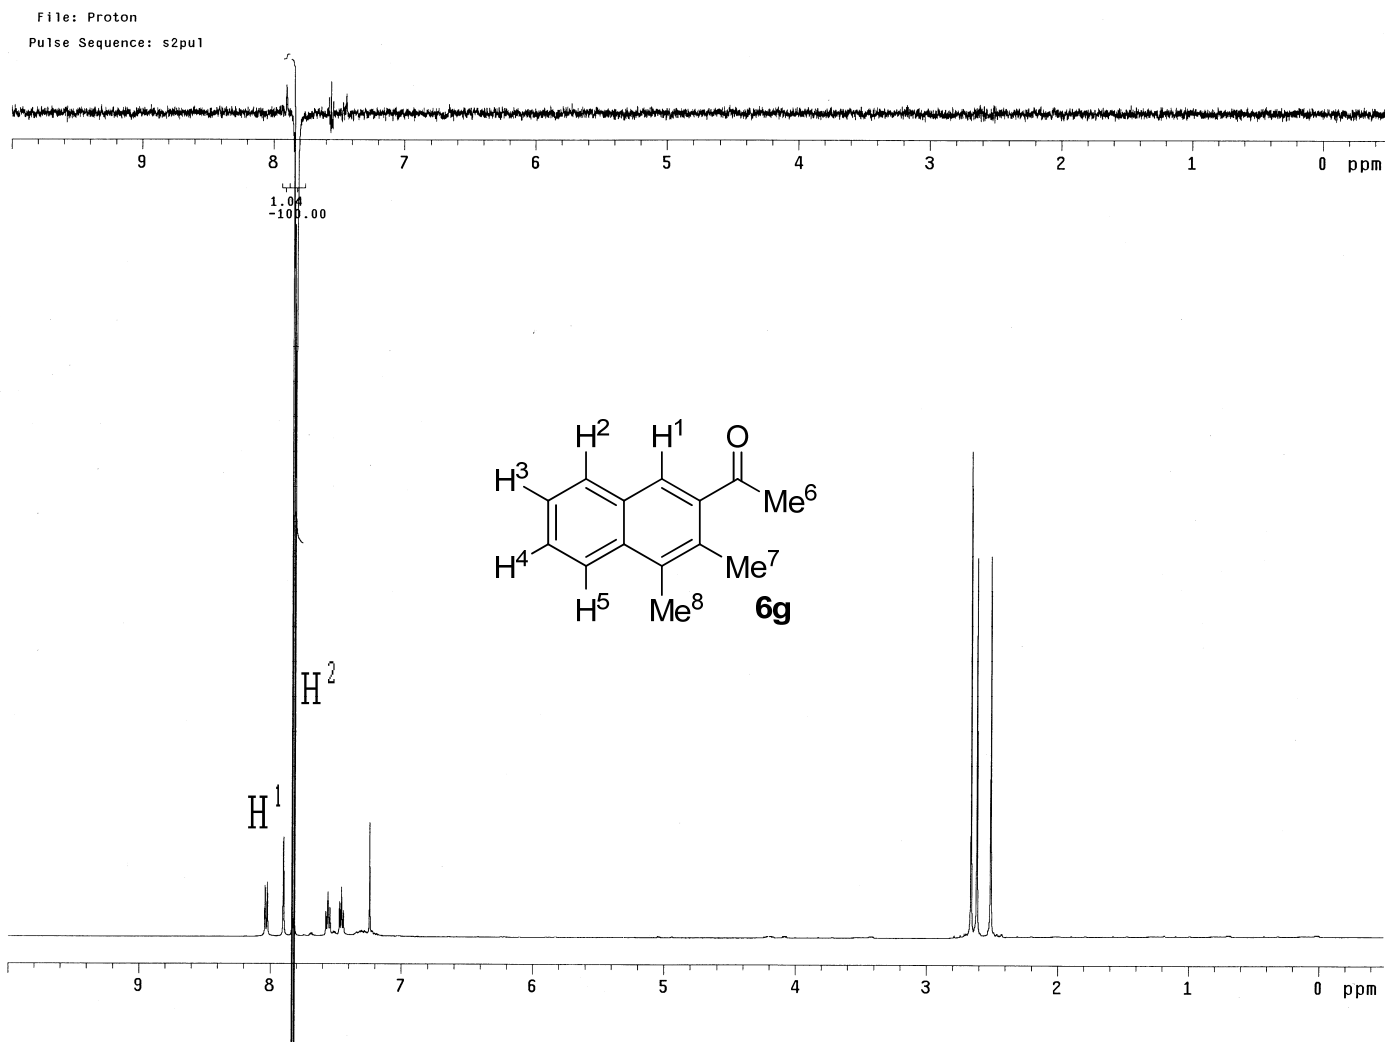

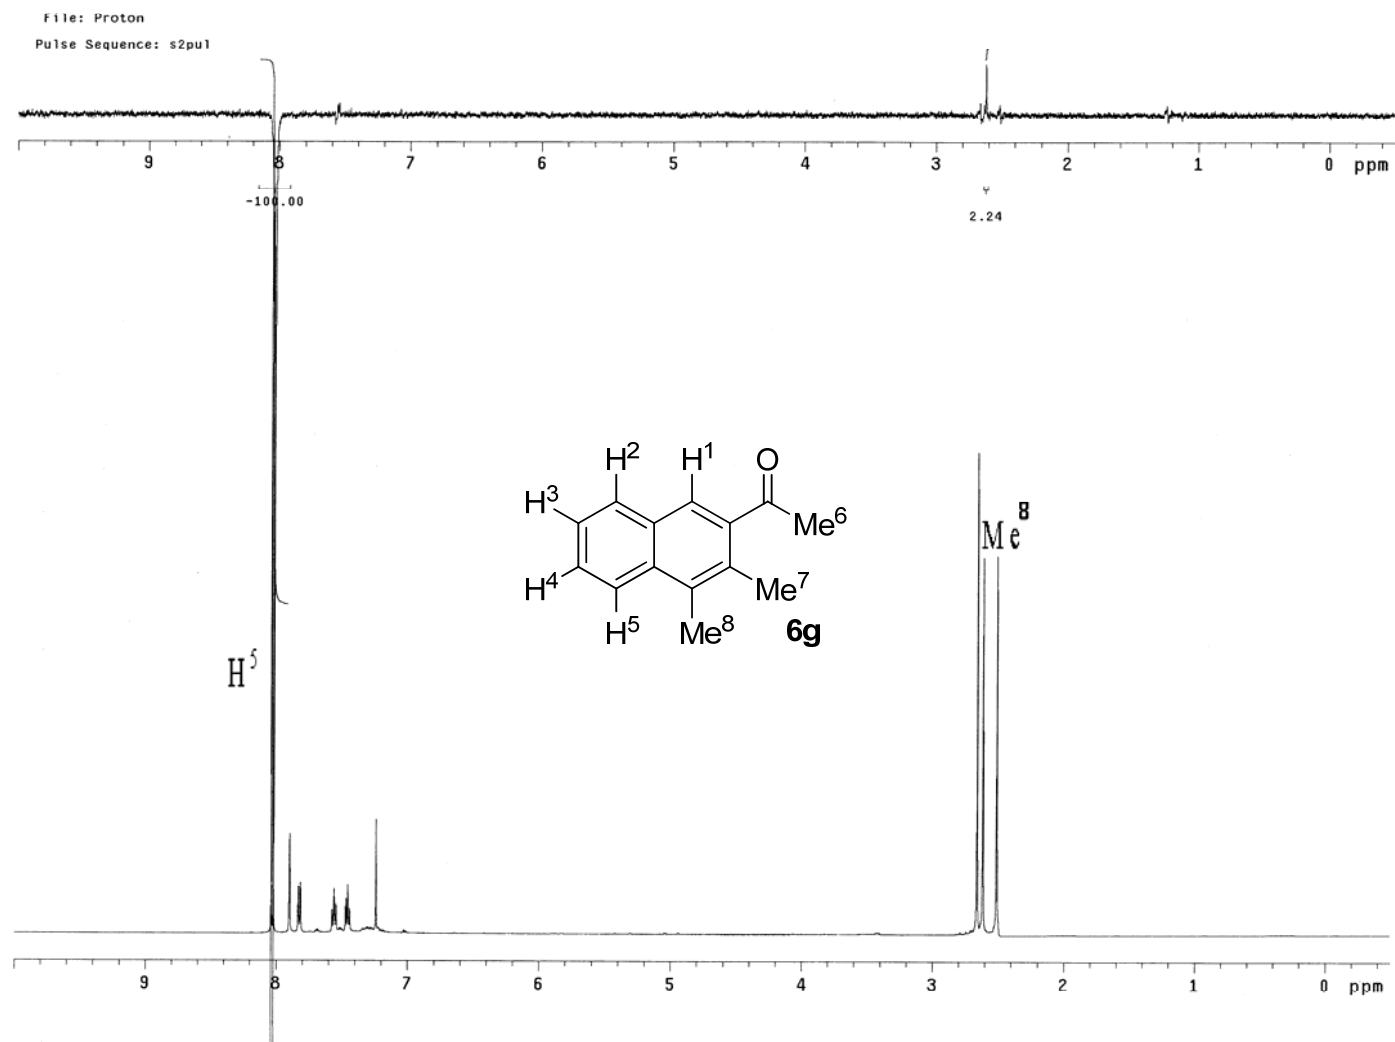

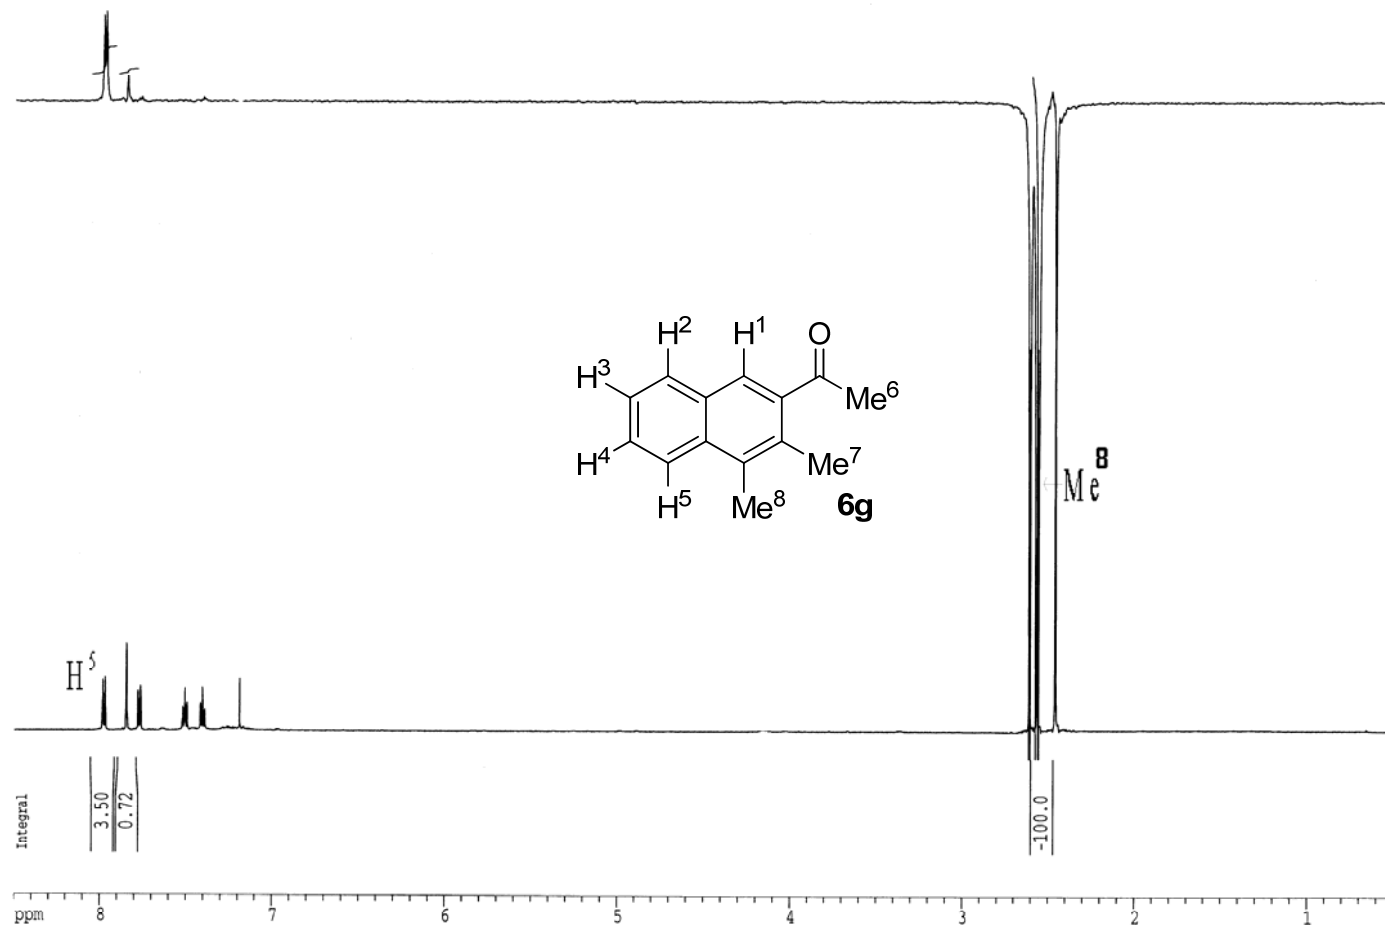

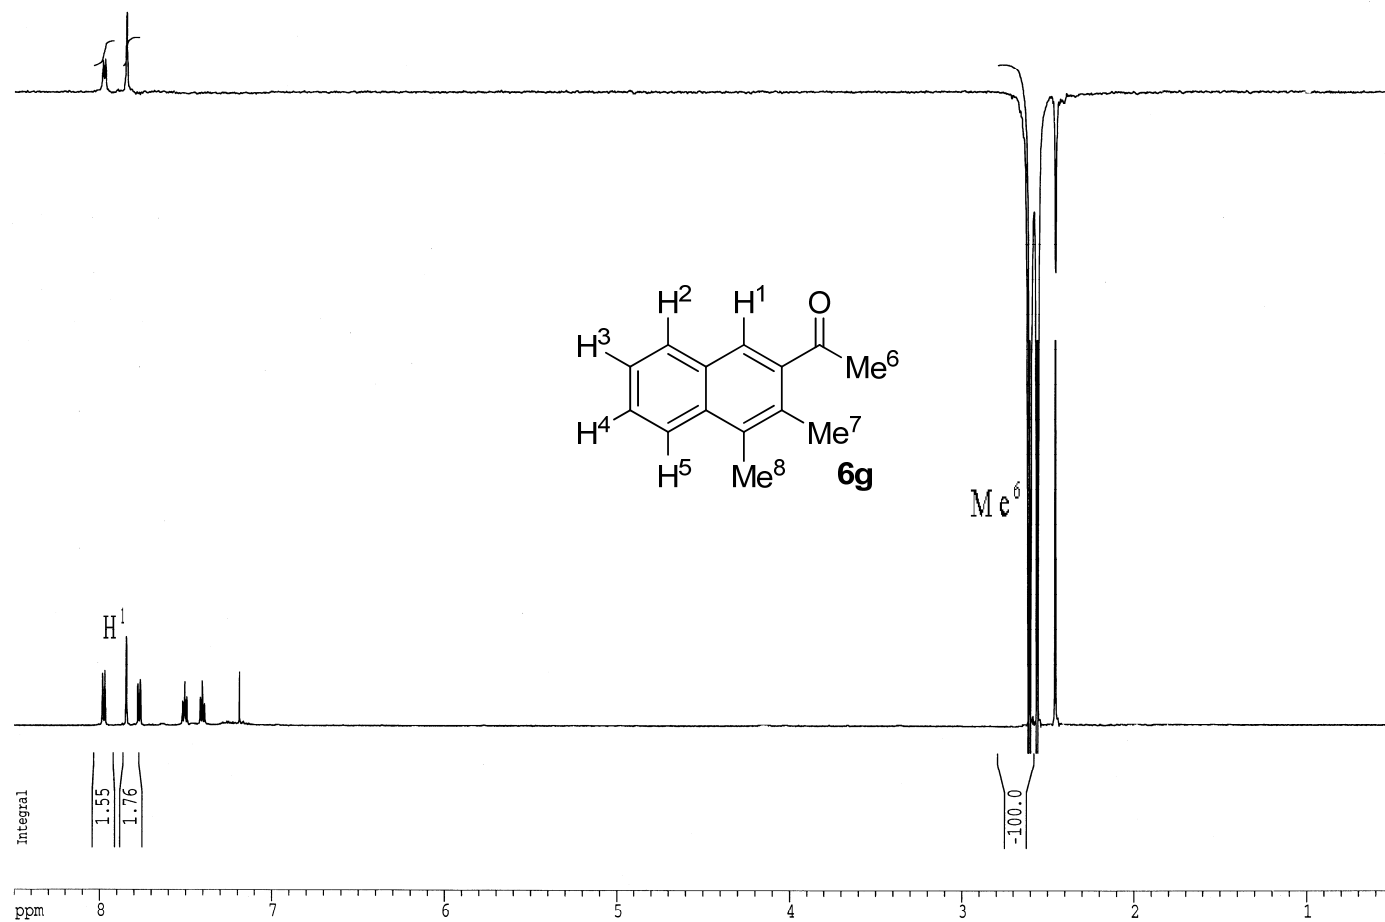



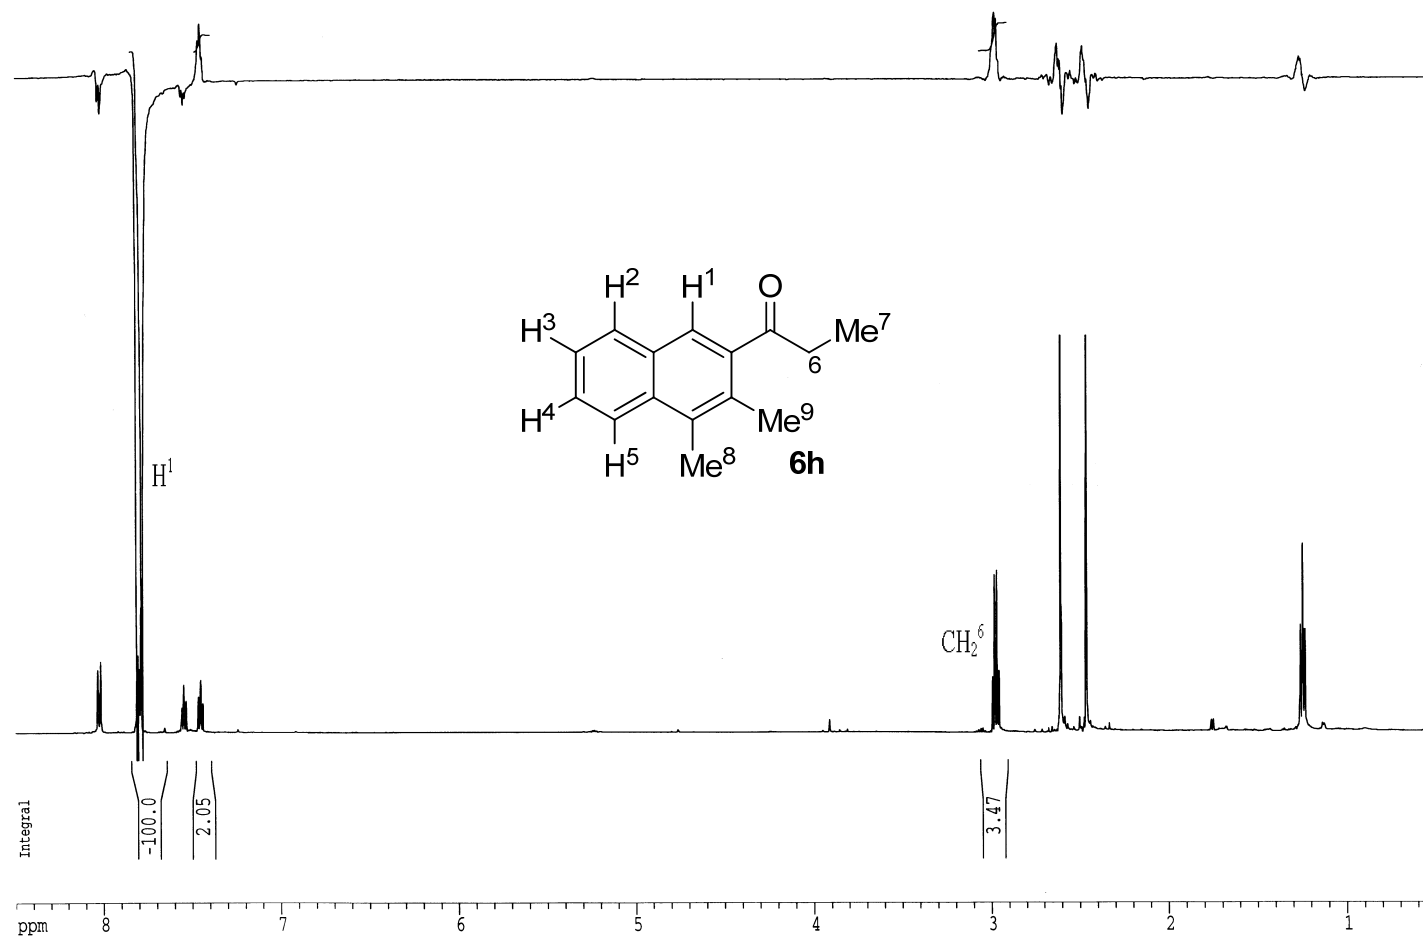

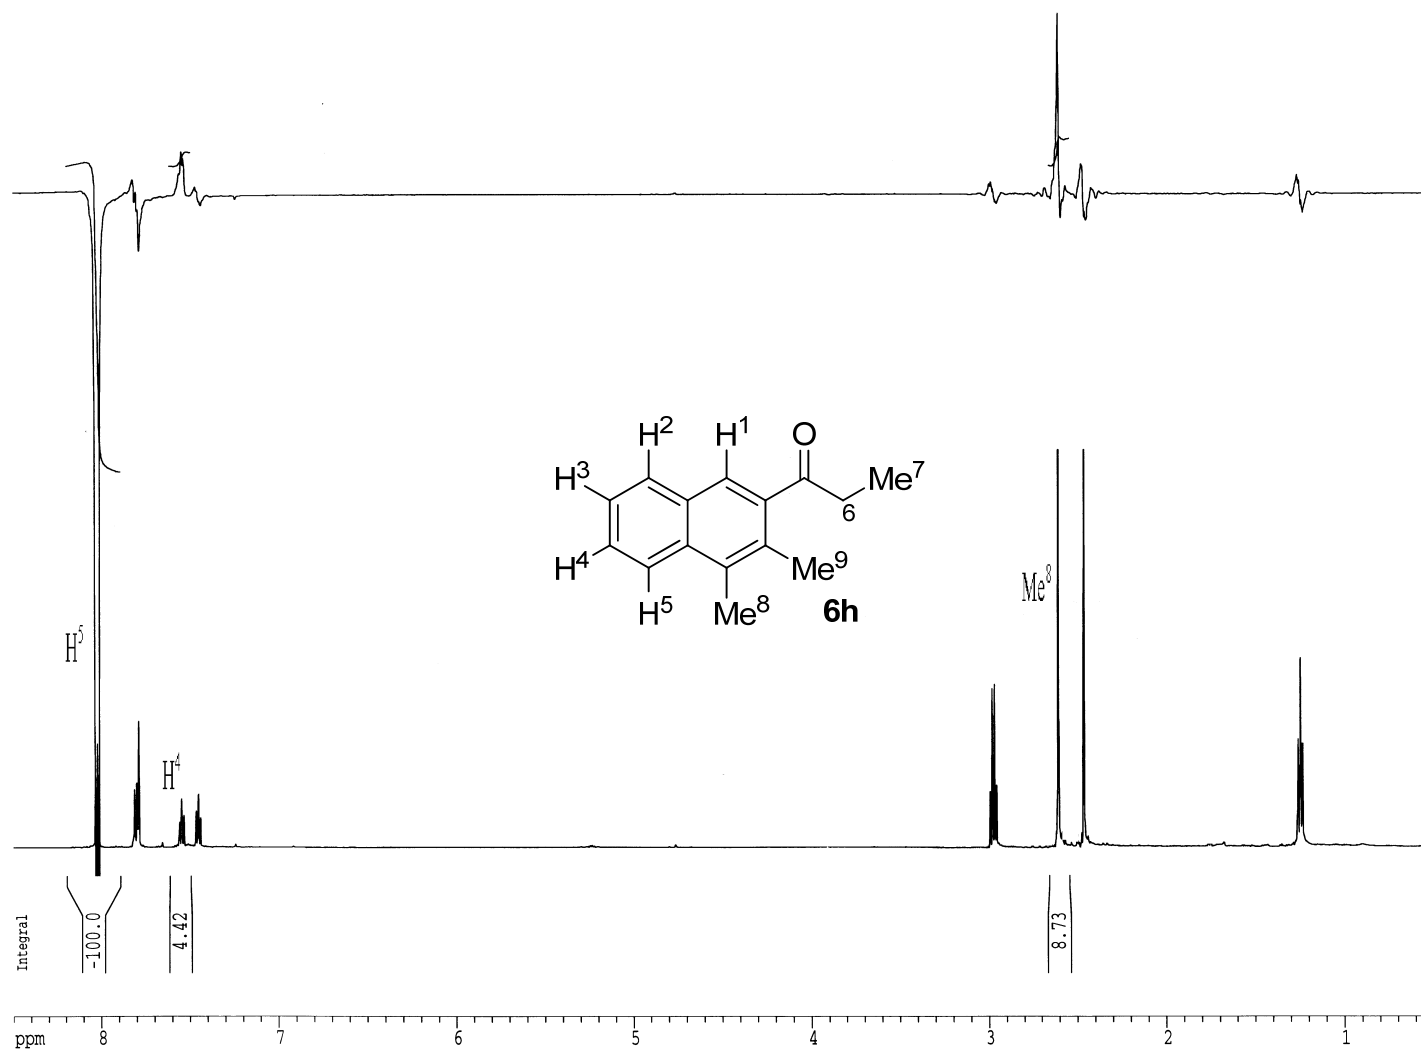

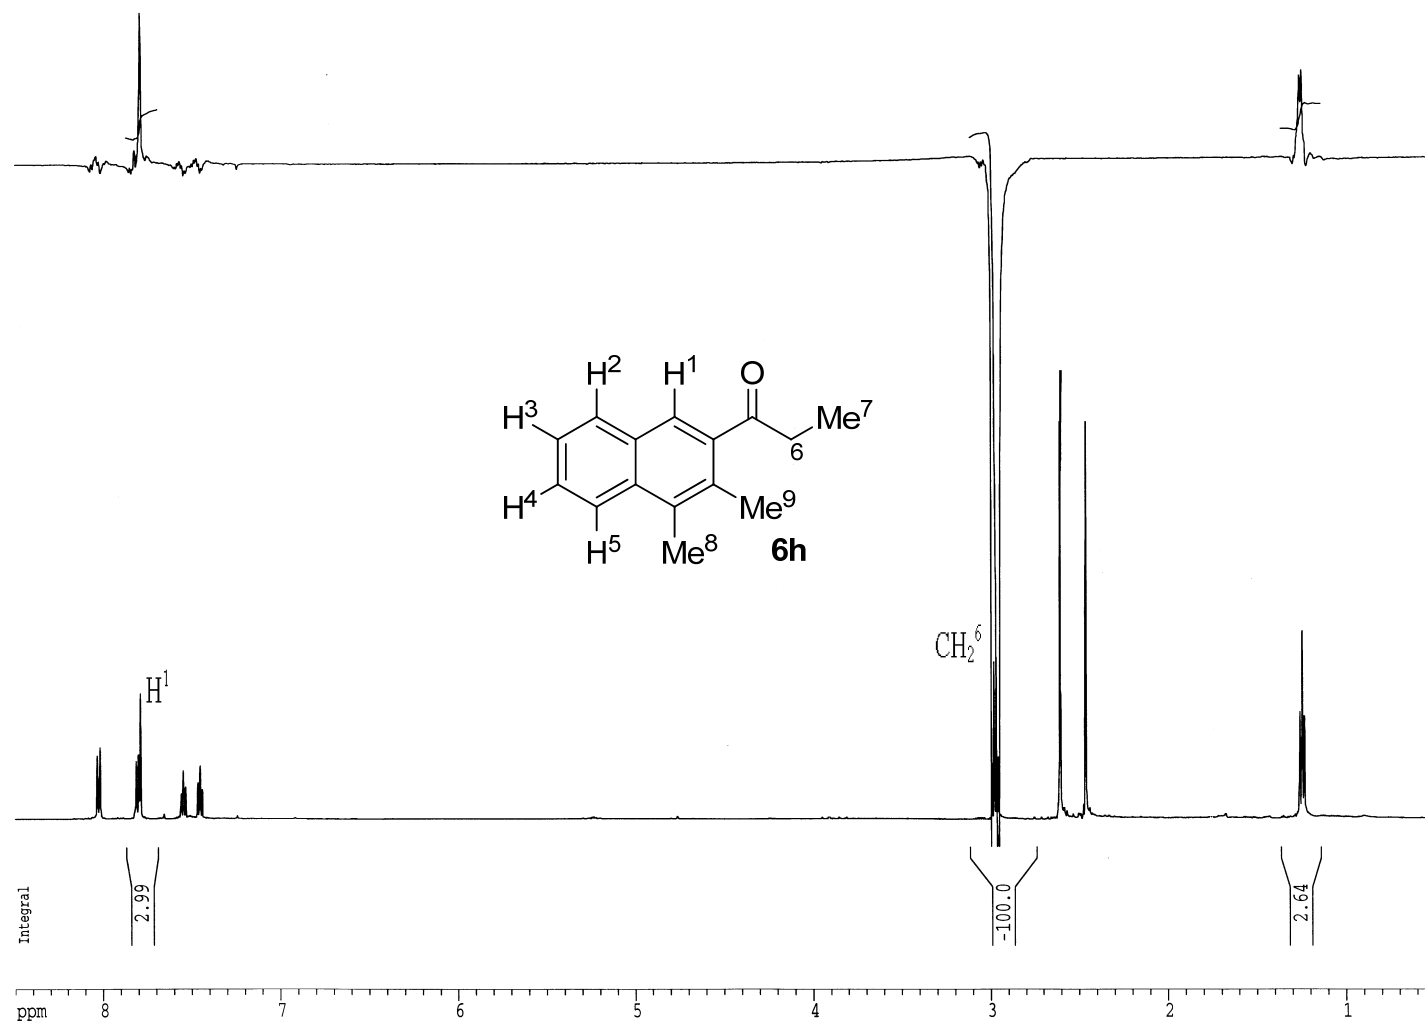

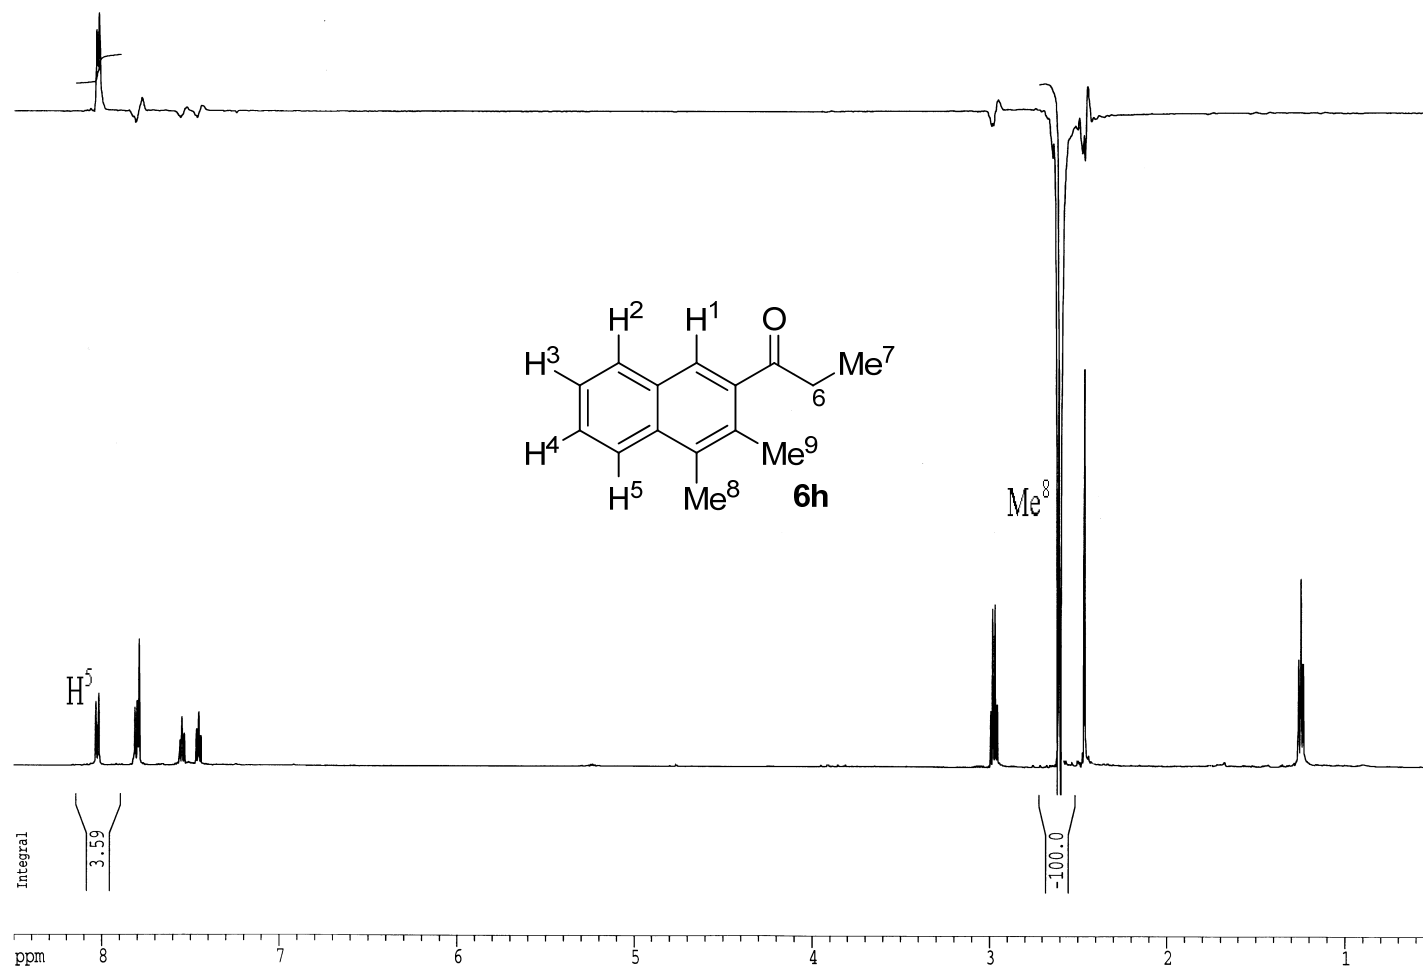

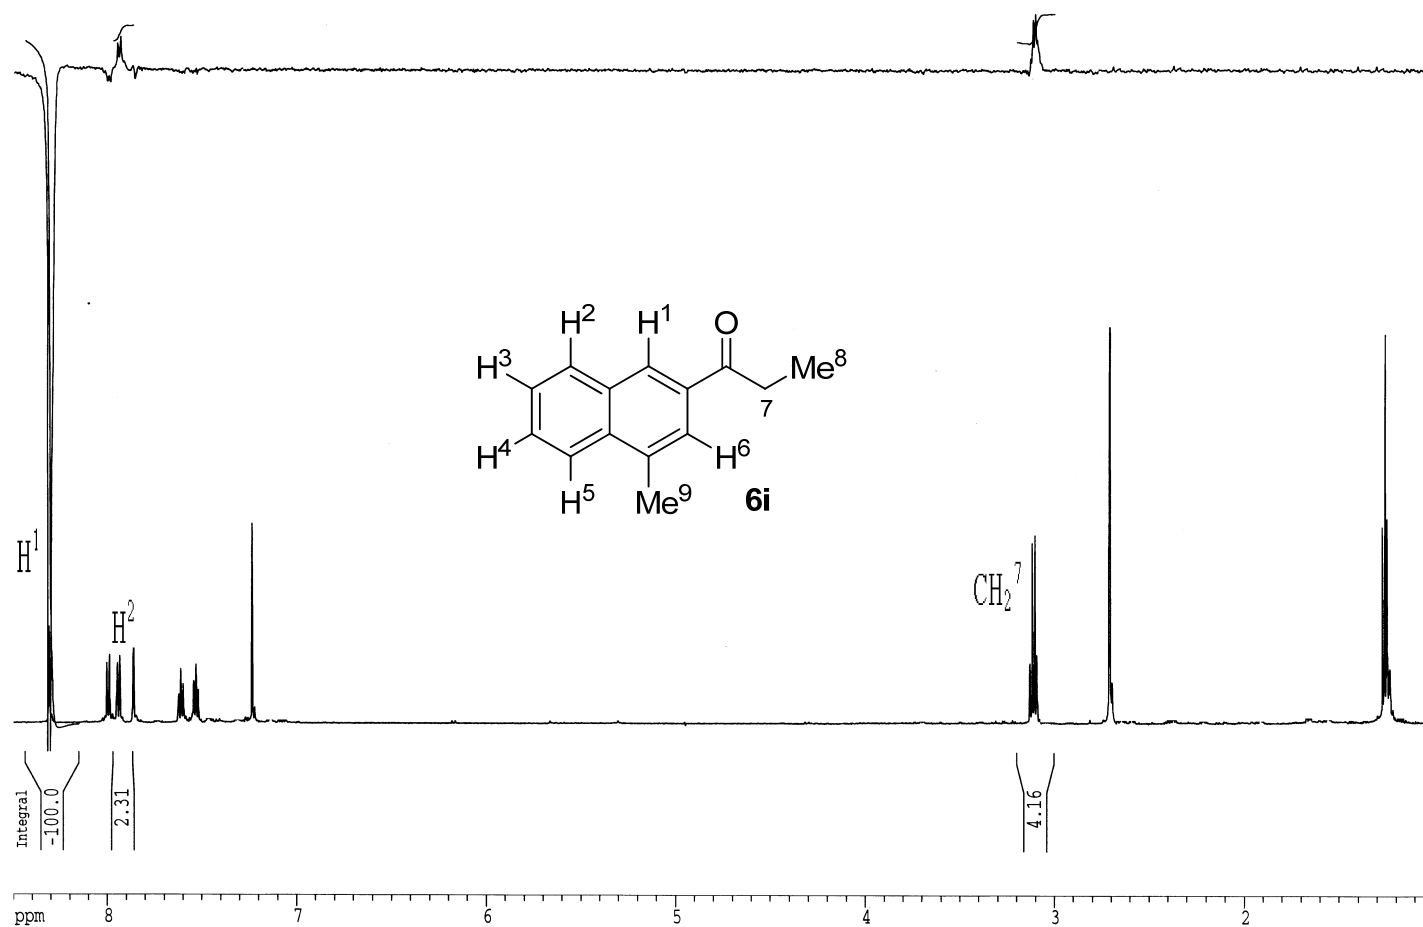

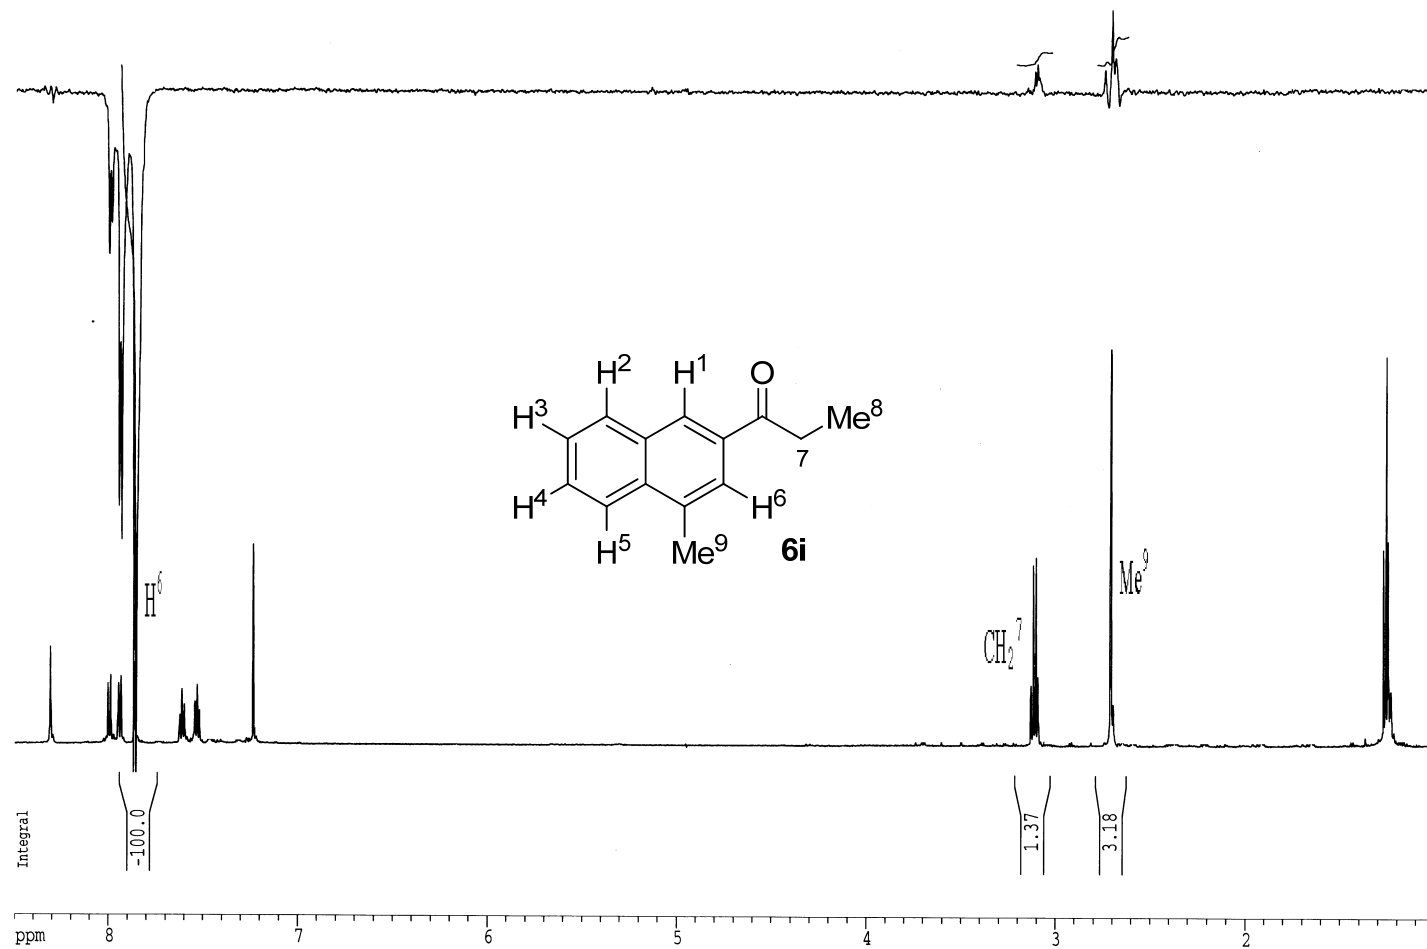

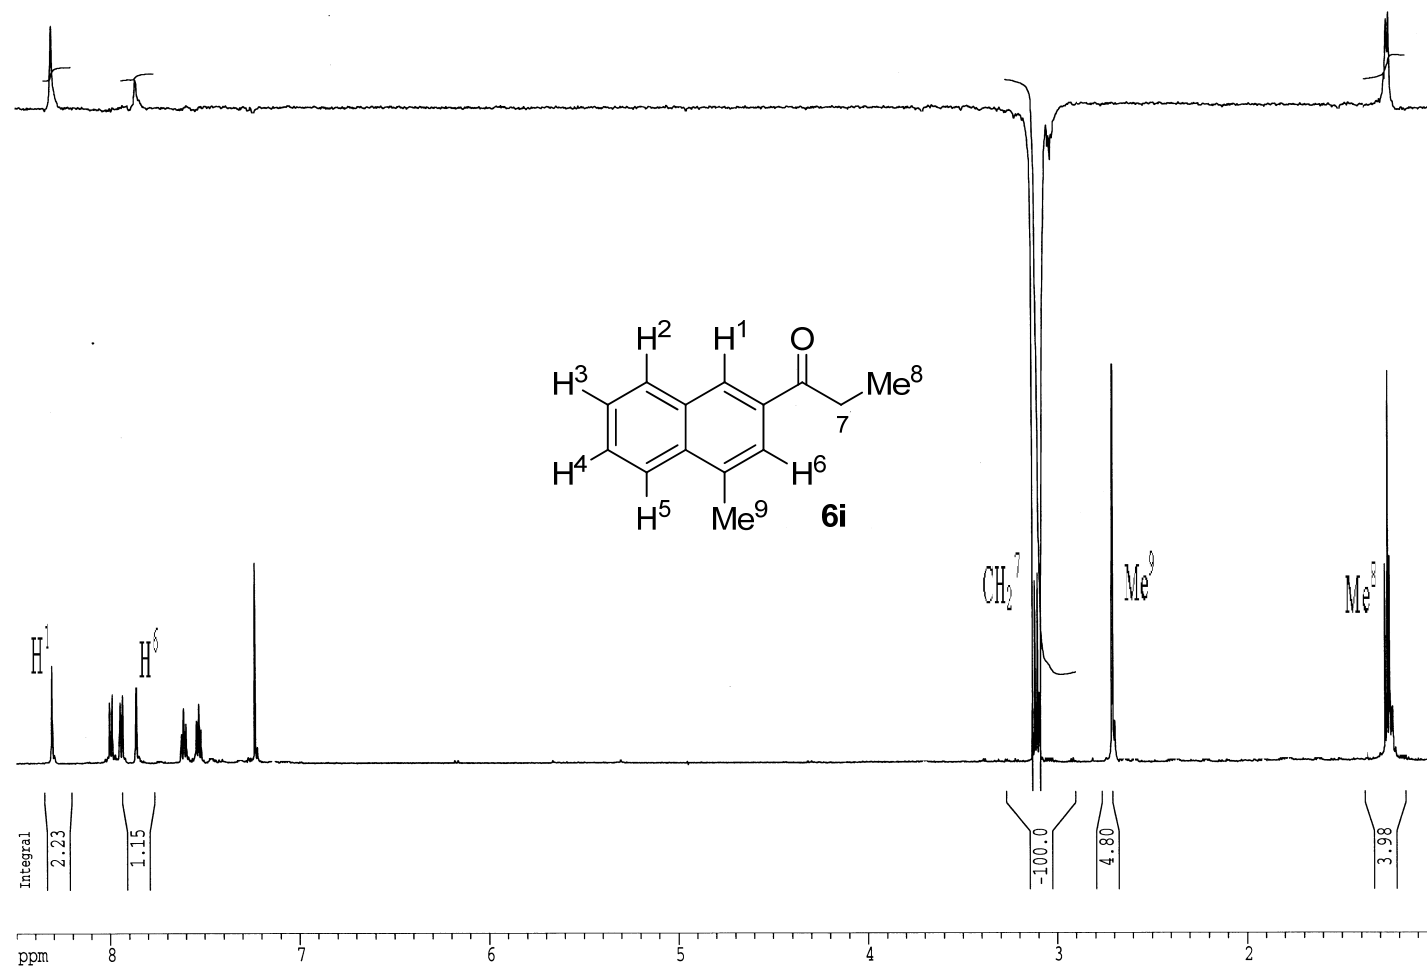

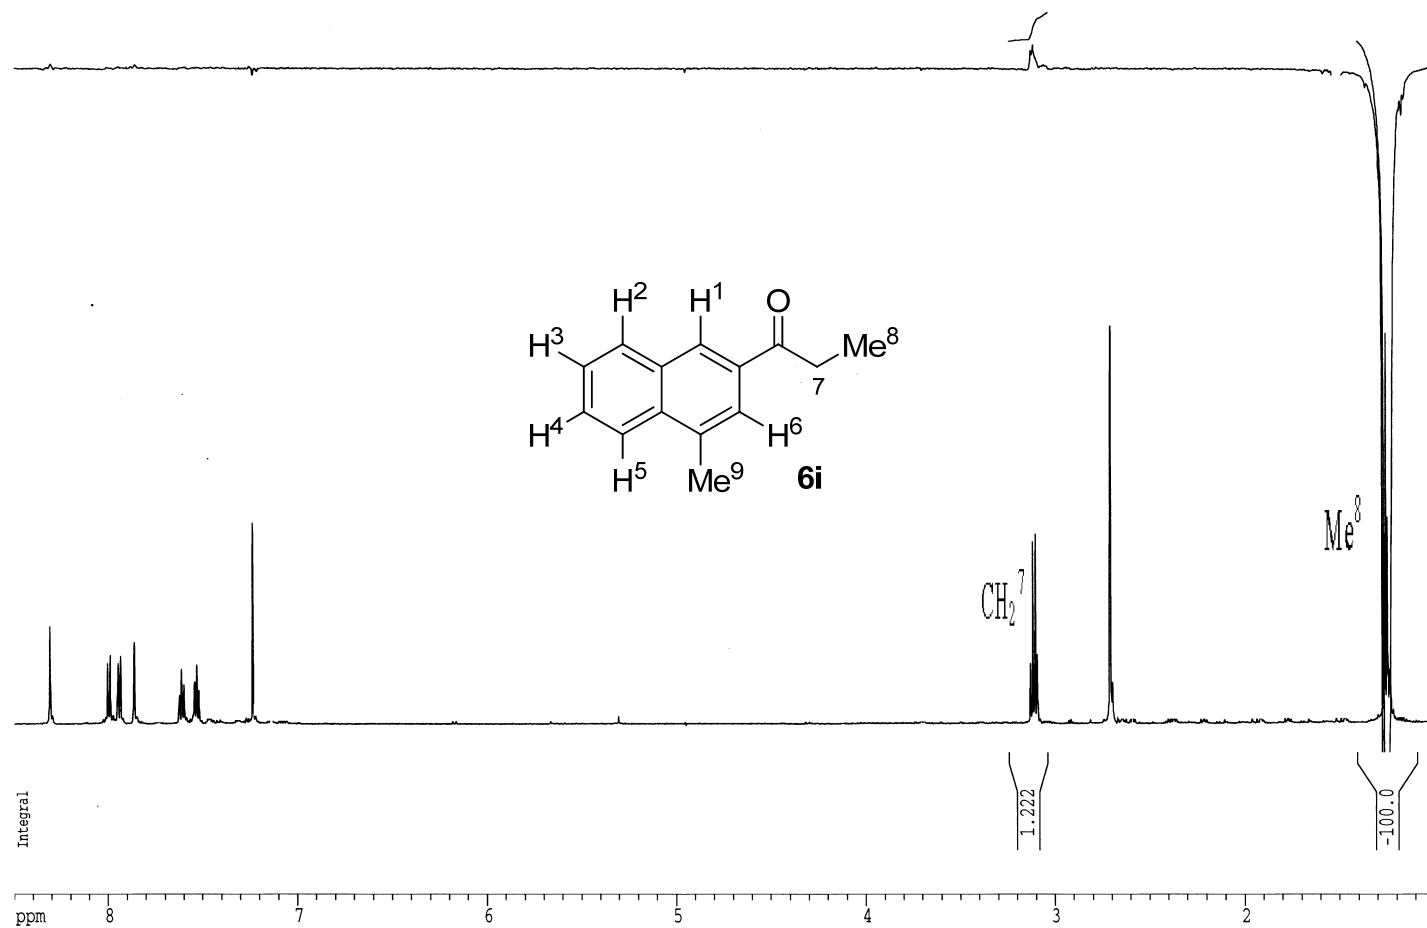



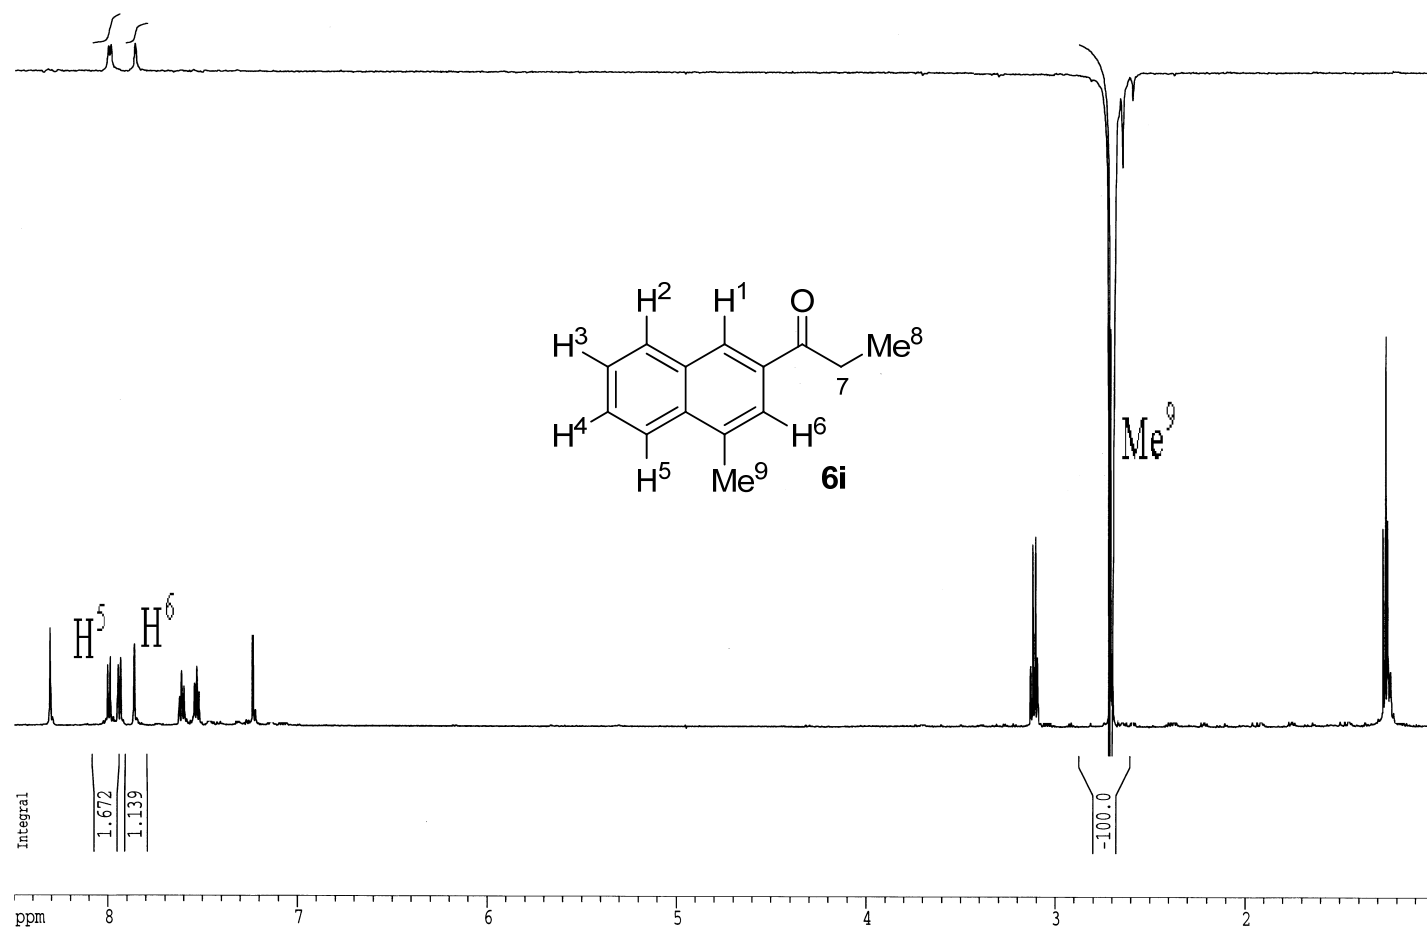

RC-4/256/P

File: Proton

Pulse Sequence: s2pu1

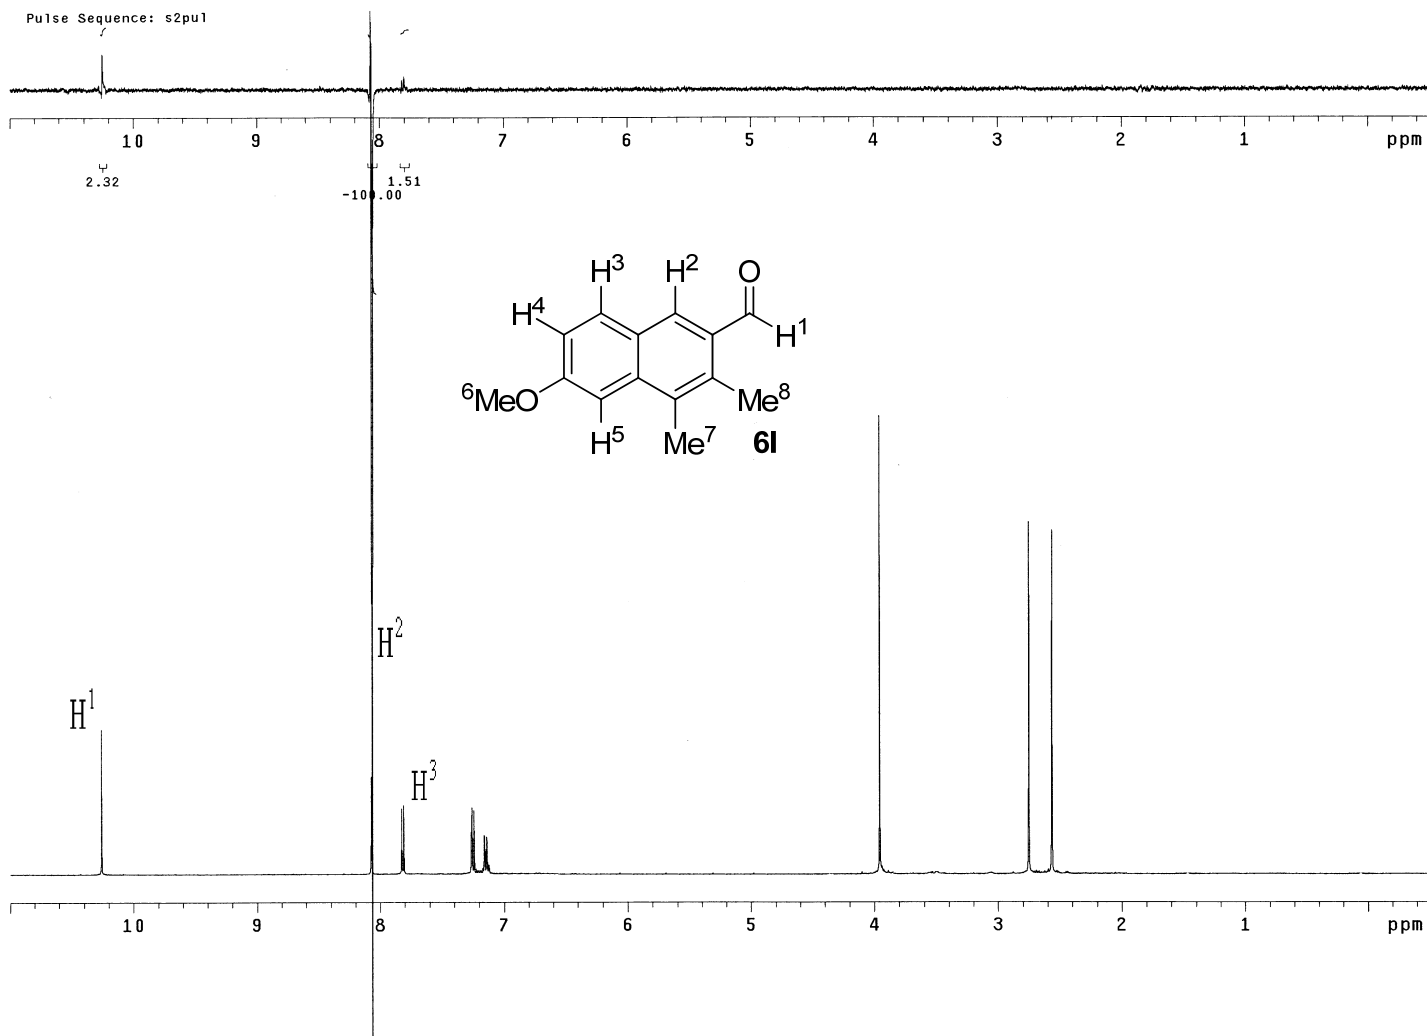

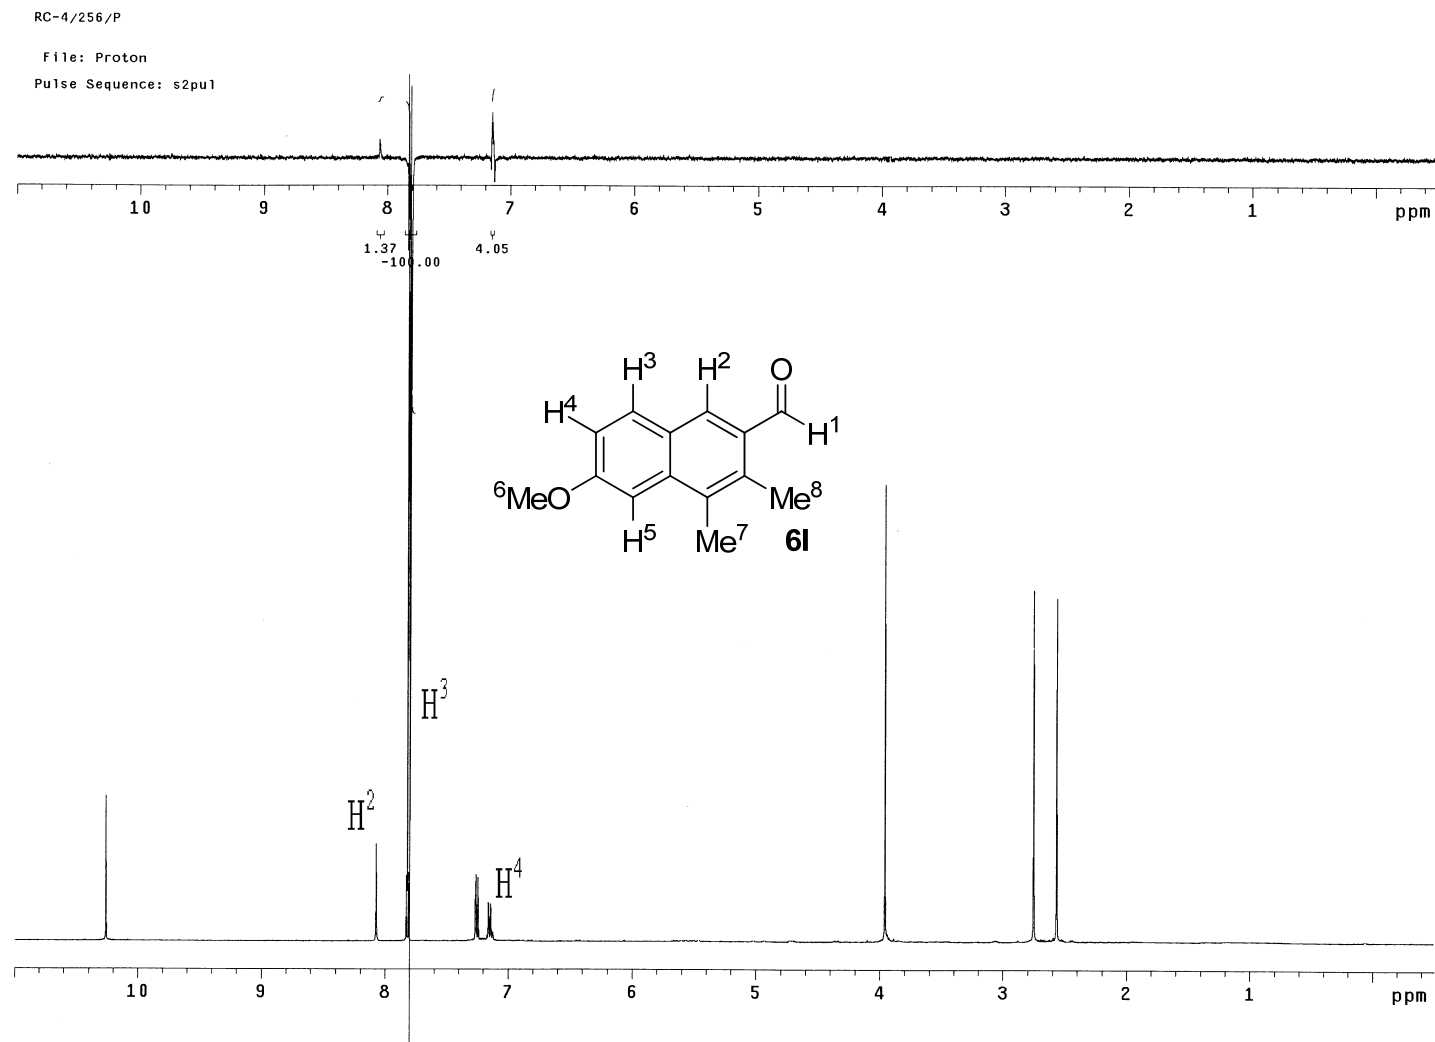

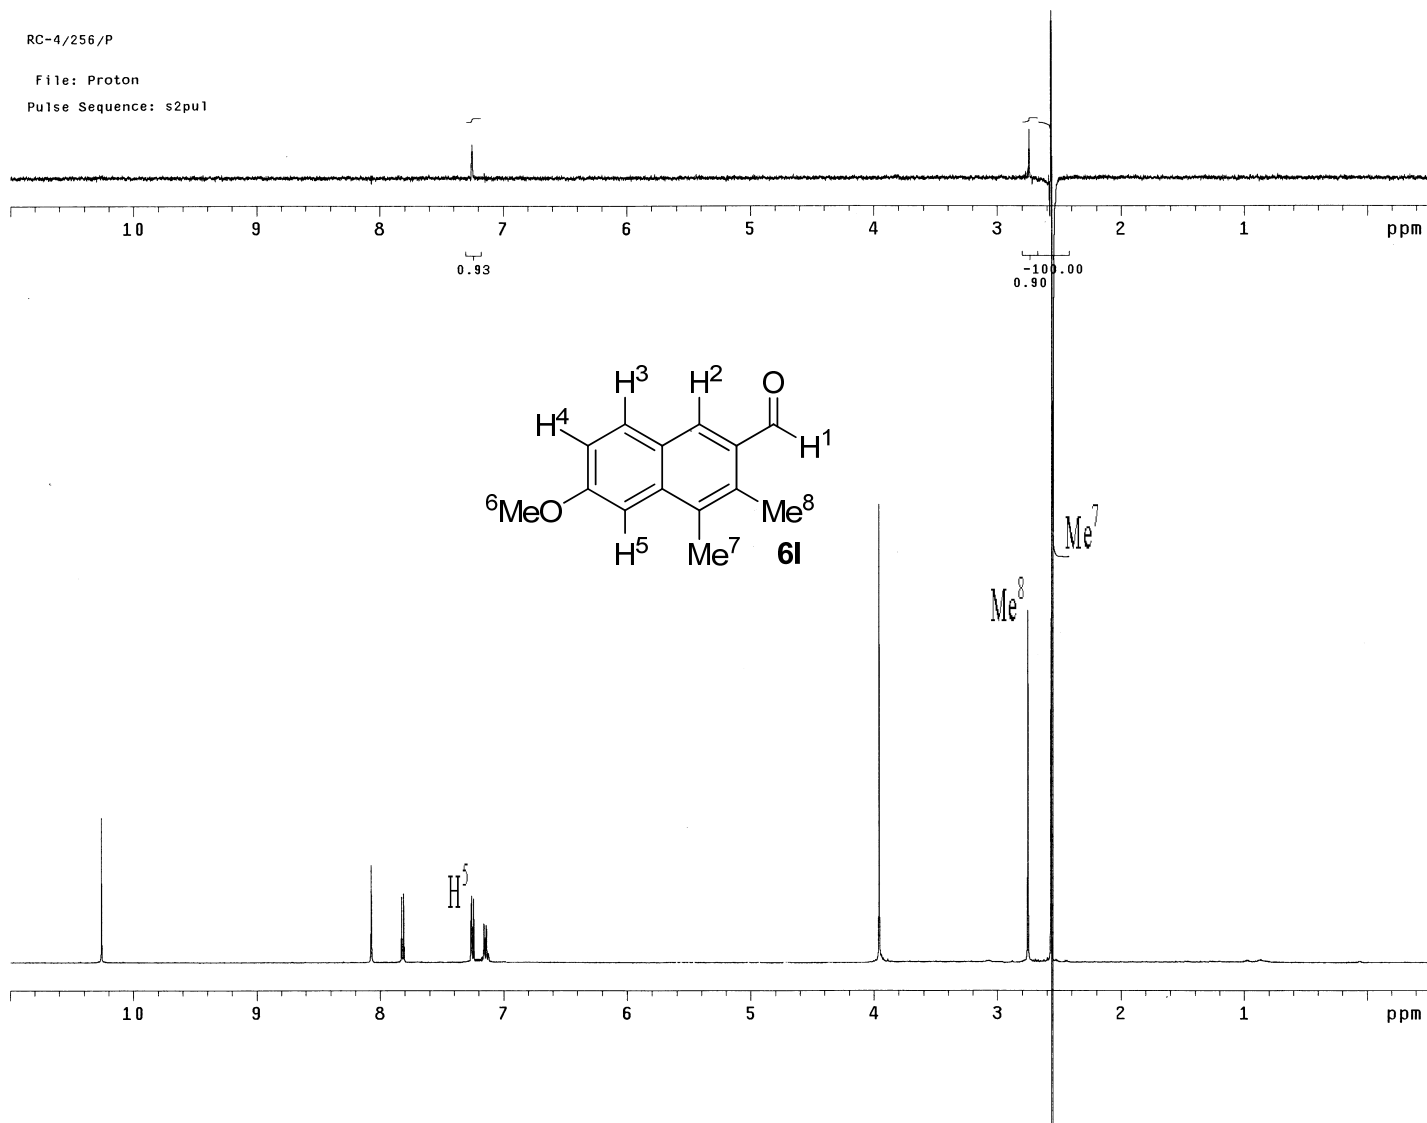

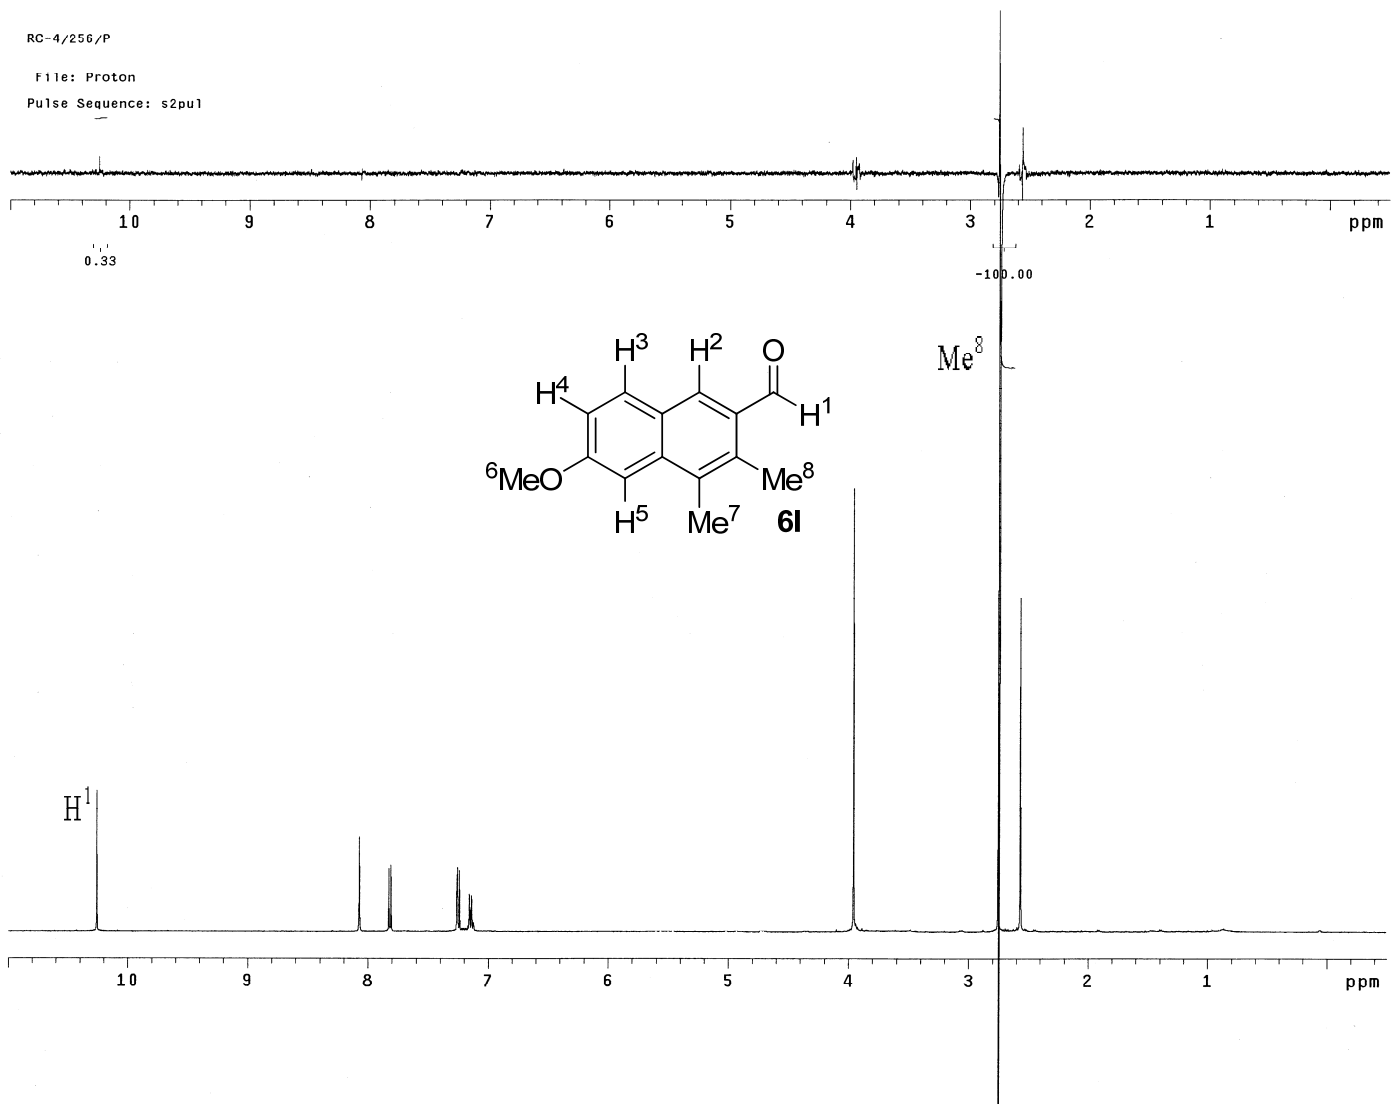

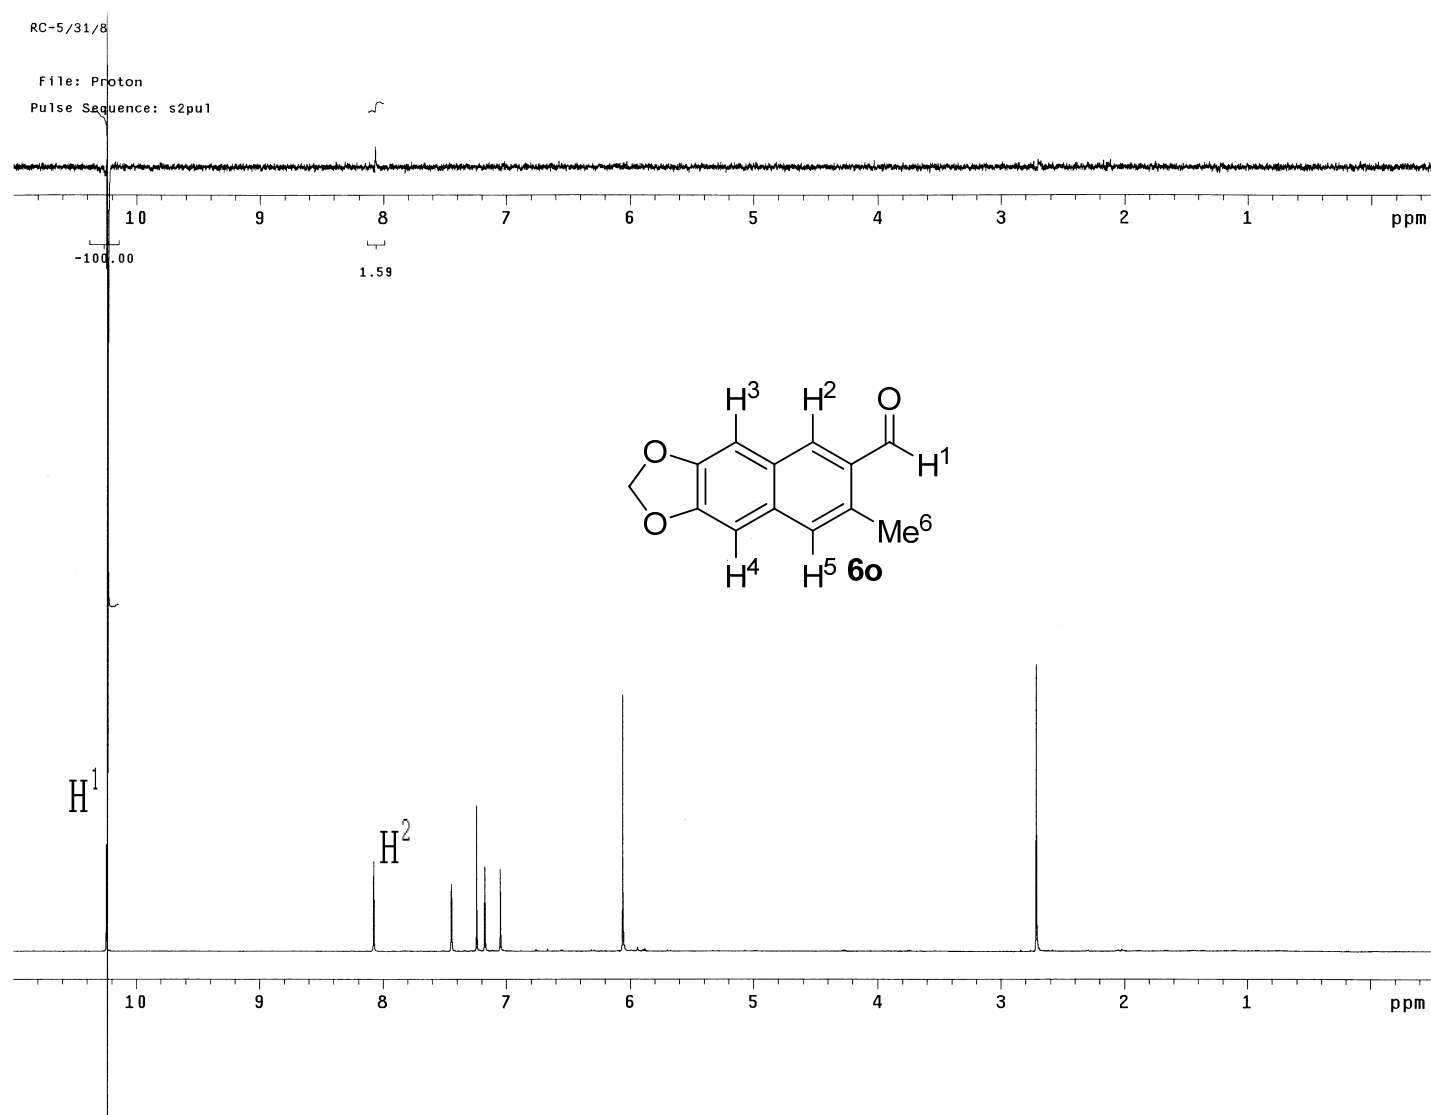

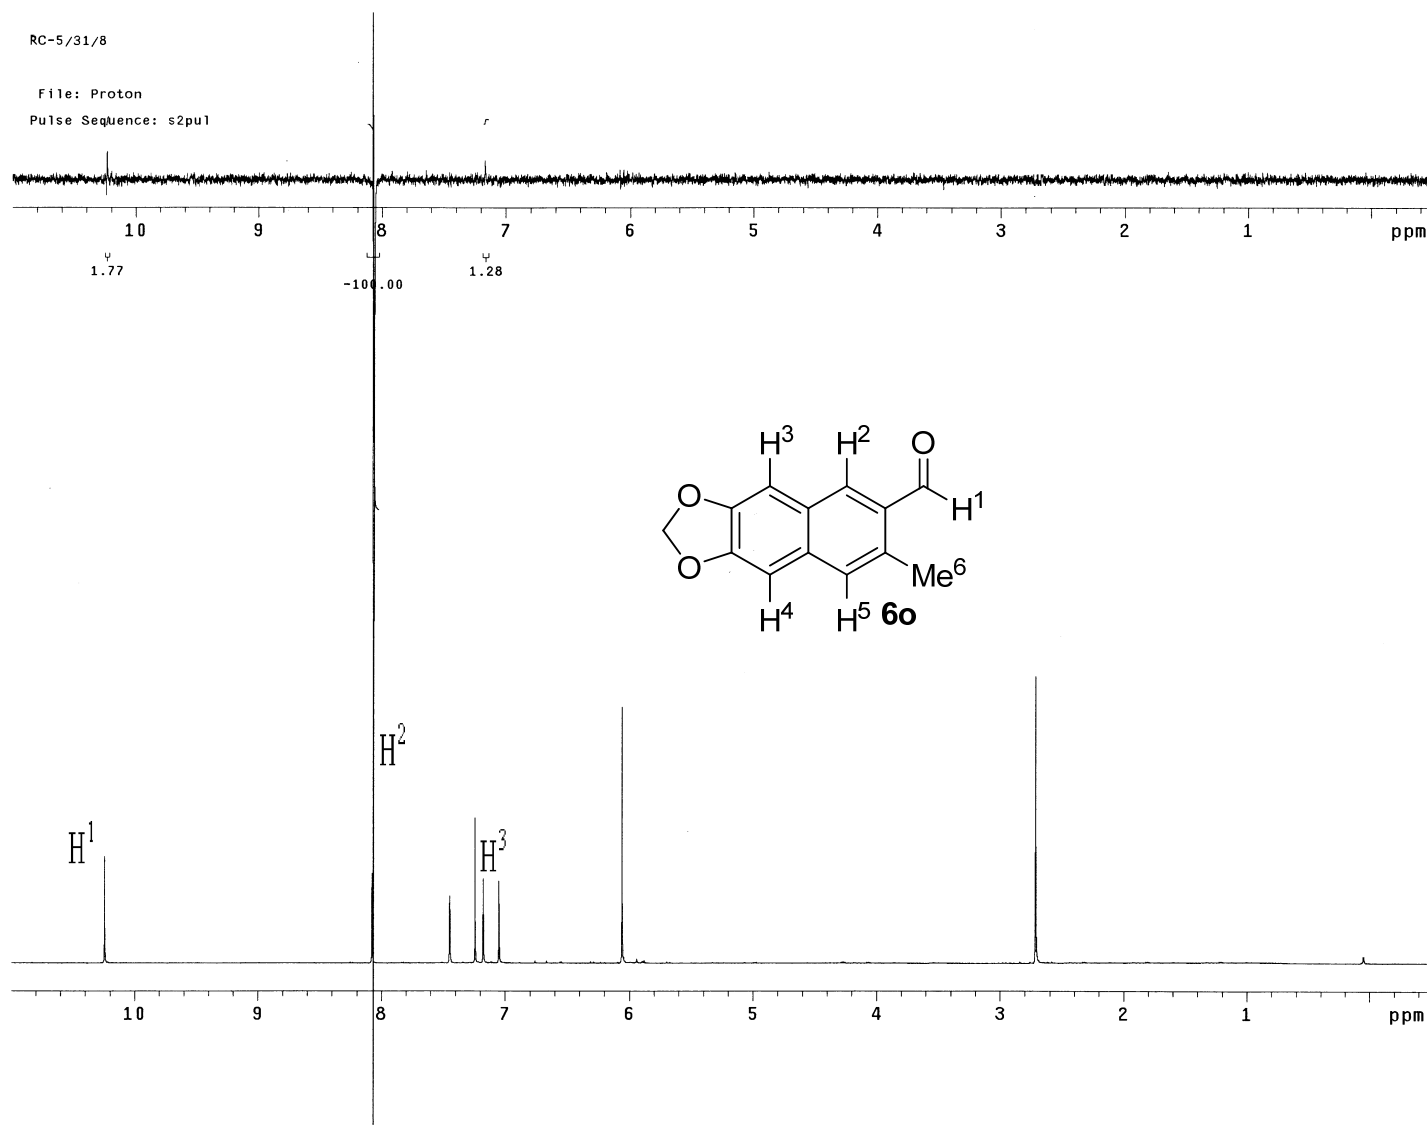

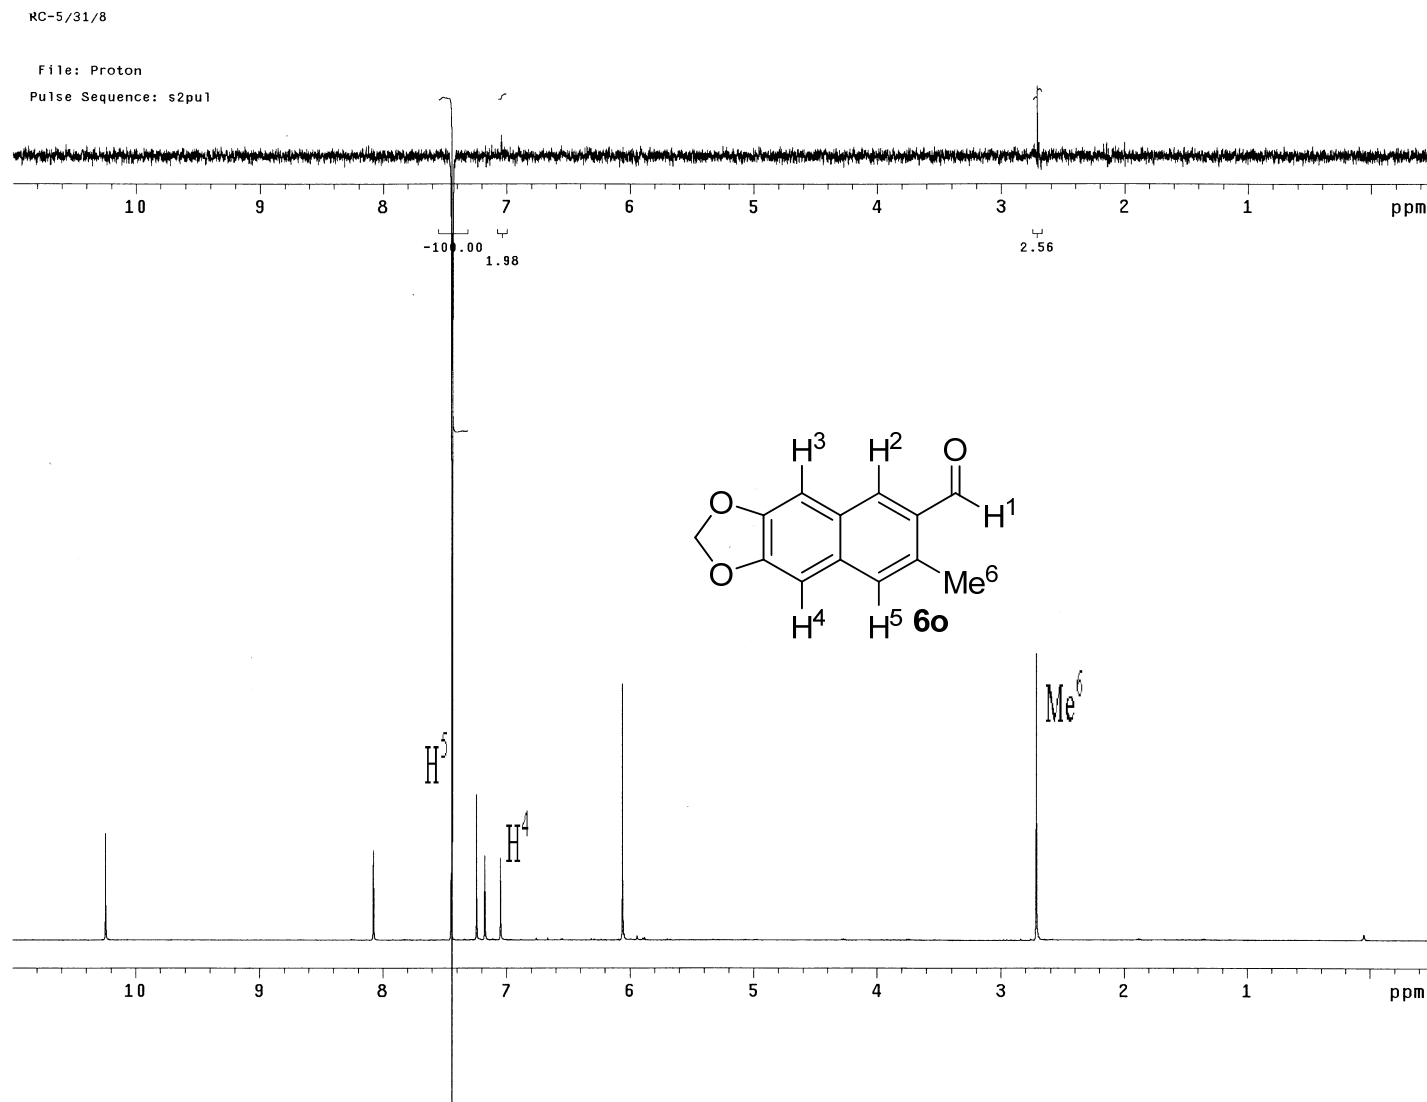



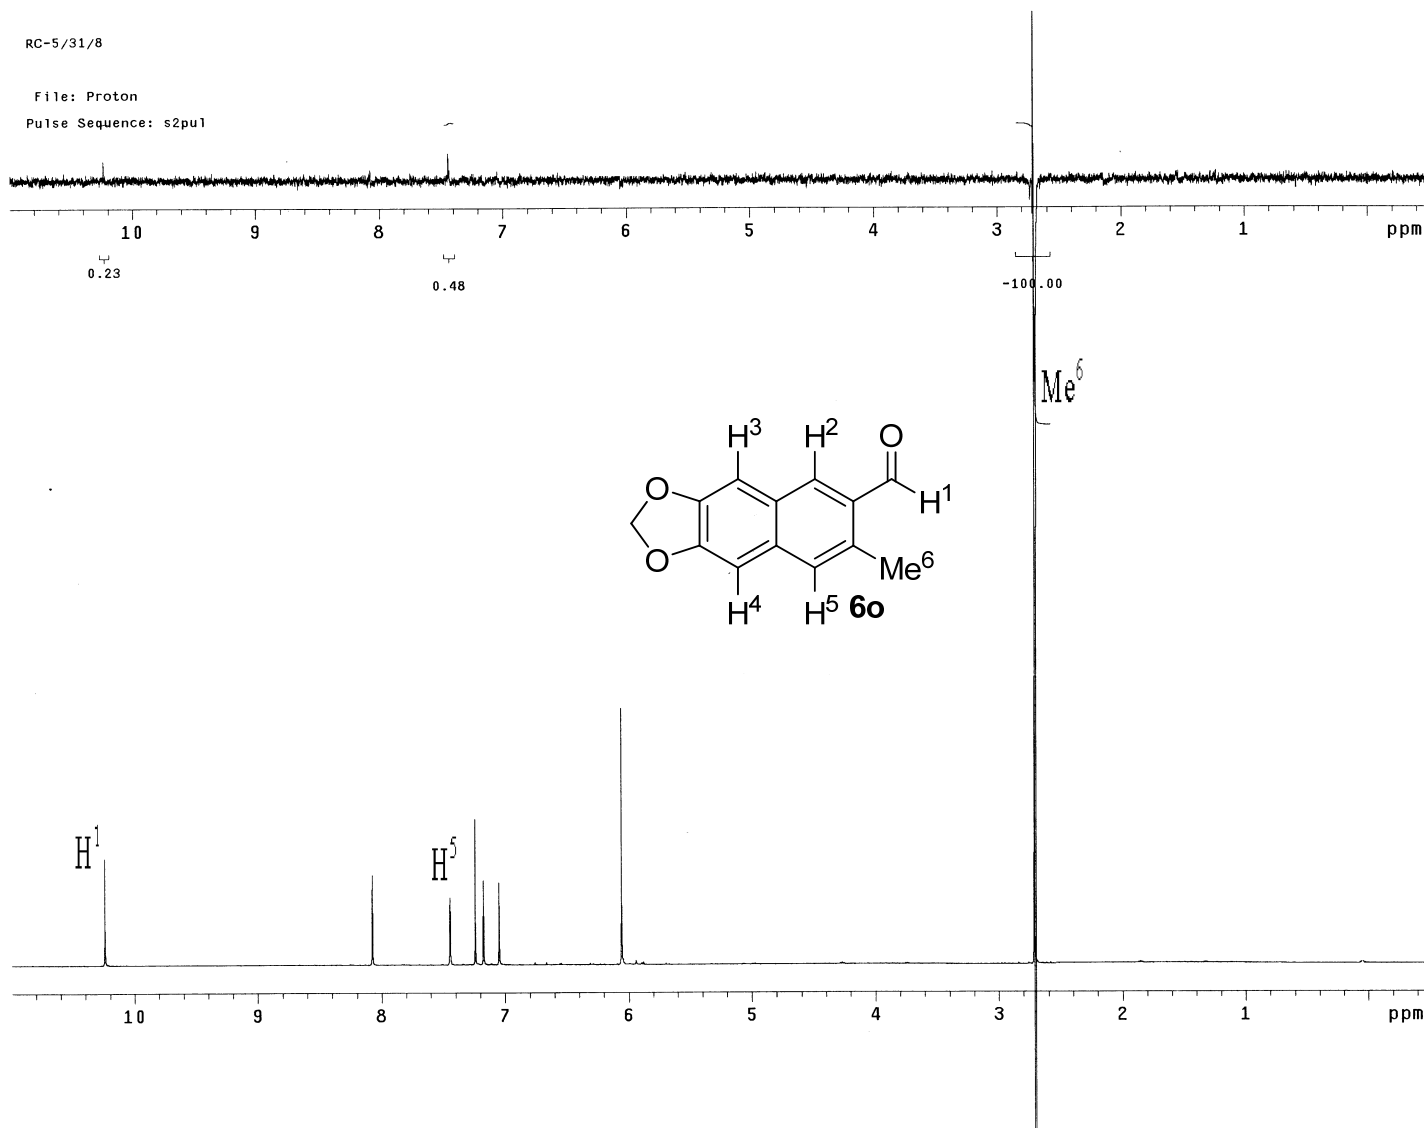

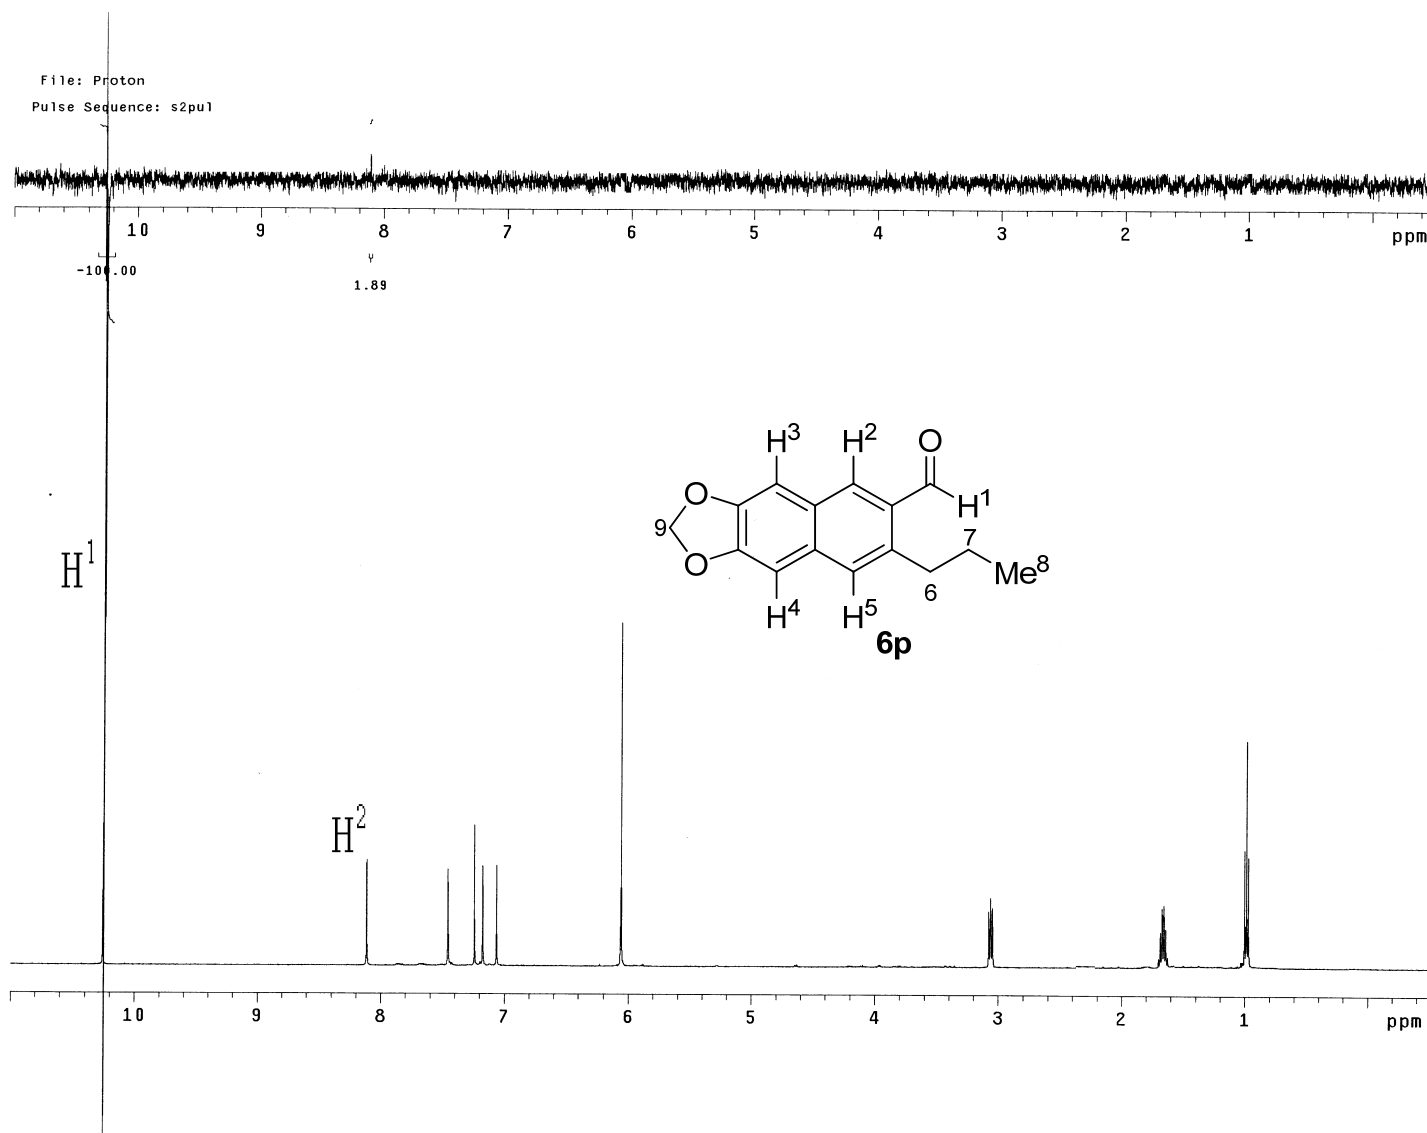

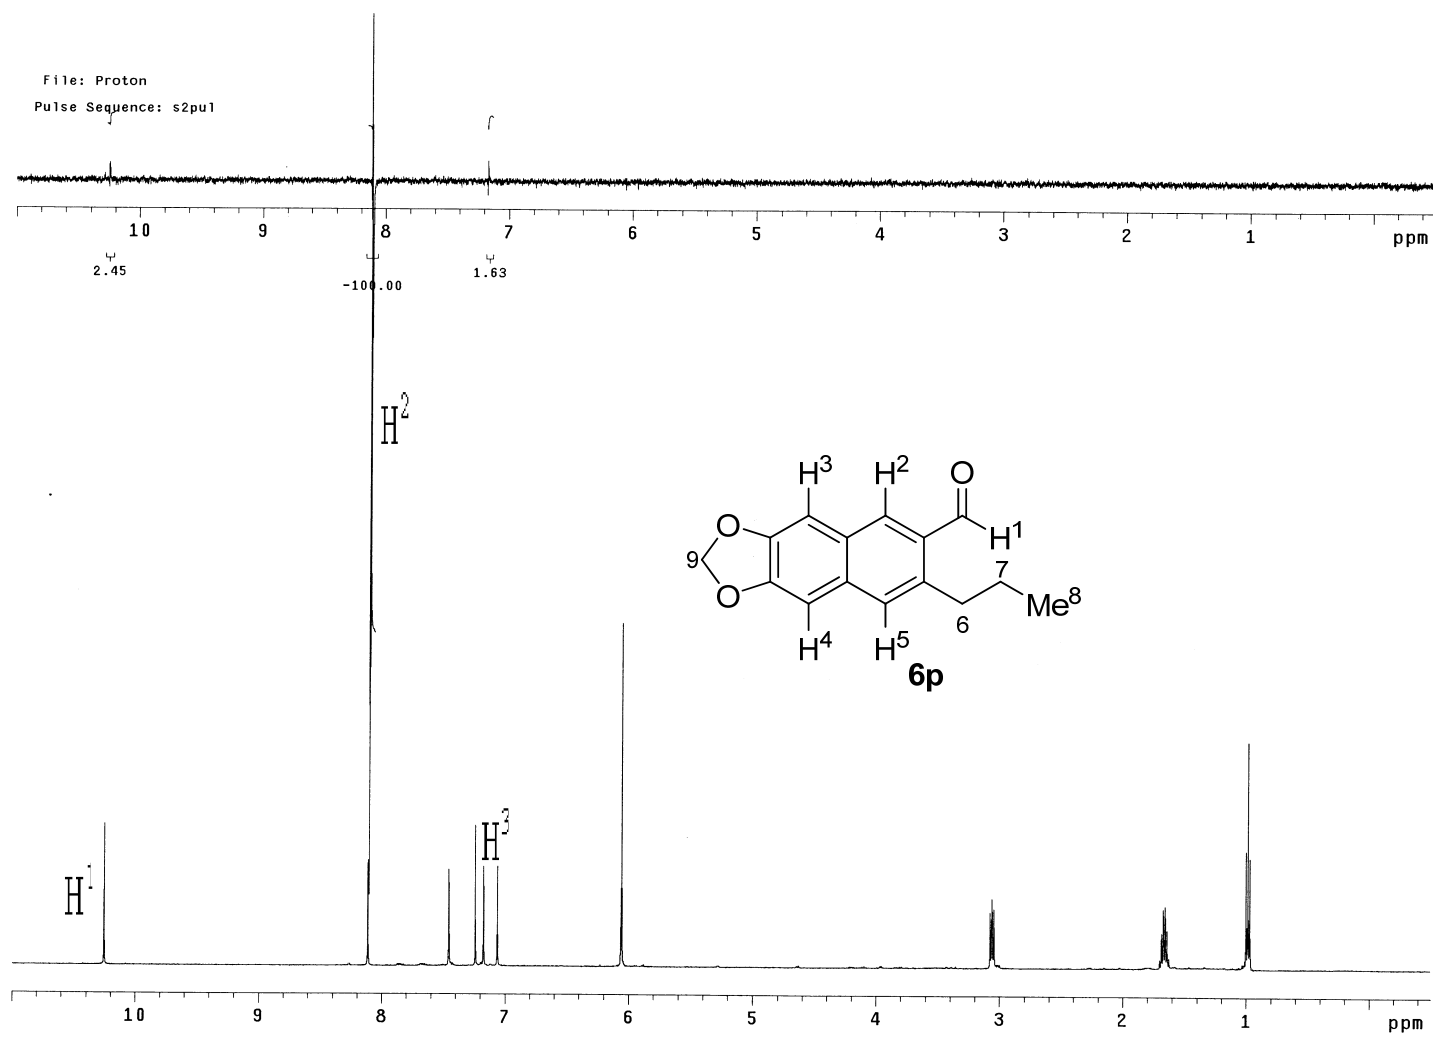

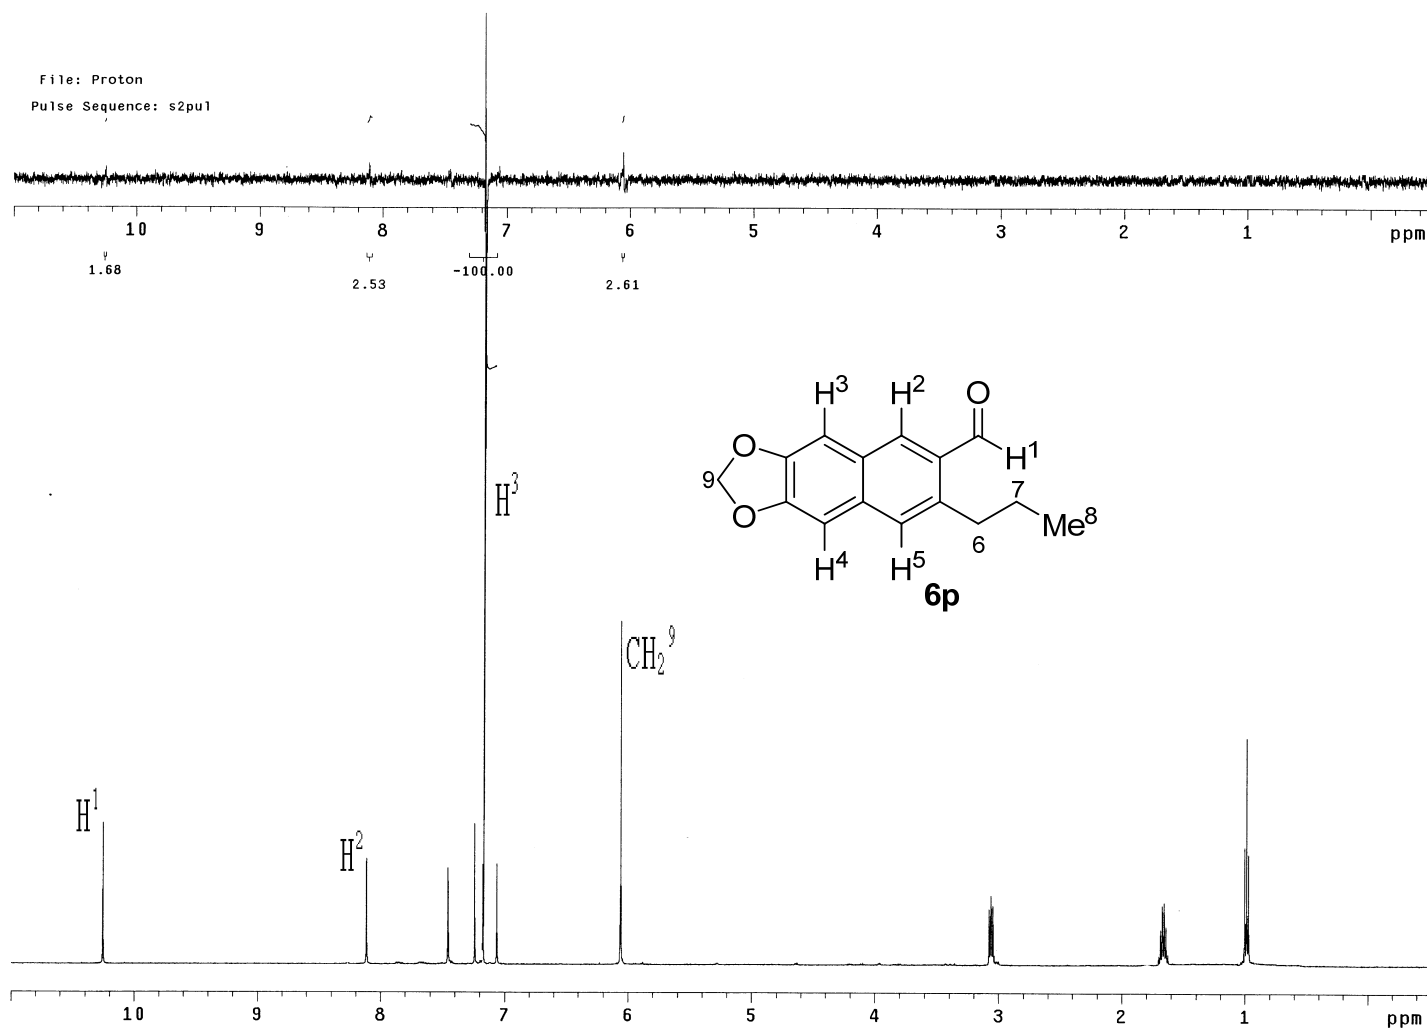

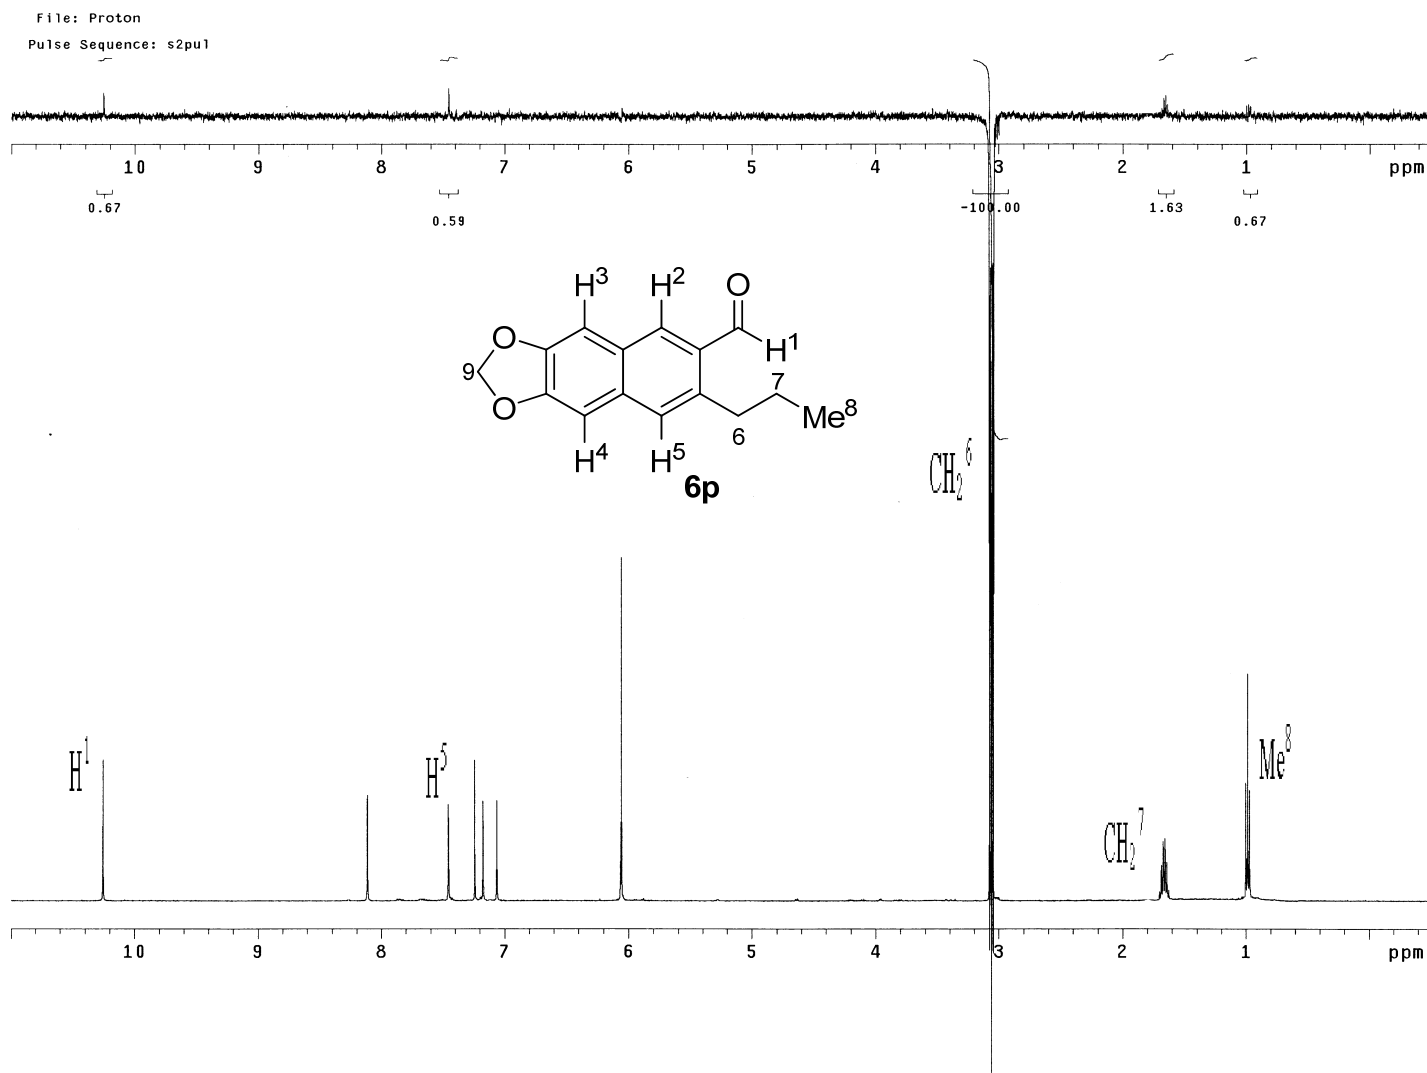

Supplement: c002660c_nmr.pdf [file c002660c_nmr.pdf]
