# Supplementary material for: A 1,3-carbonyl shift in the platinum-catalyzed aromatization of 2-epoxy-1-(methoxyalk-2-ynyl)benzenes
Source: Royal Society of Chemistry journal article supplement (doi:10.1039/c002660c), 2010-01-01
Supplement: c002660c_experimental.pdf [file c002660c_experimental.pdf]

## *Supporting Information*

### **A 1,3-Carbonyl Shift in the Platinum-catalyzed Aromatization of 2-Epoxy-1-(methoxyalk-2-ynyl)benzenes**

Rupsha Chaudhuri, Arindam Das, Hsin-Yi Liao and Rai-Shung Liu\*

<sup>†</sup>*Department of Chemistry, National Tsing-Hua University, Hsinchu, Taiwan, ROC and*

<sup>‡</sup>*Department of Science Education, National Taipei University of Education, Taipei,  
Taiwan, ROC*

----- *rslu@mx.nthu.edu.tw*

#### *Contents*

- (I) Mechanistic discussion of 2-naphthyl ketone **3** -----S 2
- (II) Experimental procedures for the synthesis of epoxides **1a**, **1b**, **1c**-----S 2-S 5
- (III) Standard procedure for catalytic operations-----S 5
- (IV) Synthetic route and experimental procedure for compound **8**-----S 5-S 7
- (V) Spectral data for **1a-8** and NOE data for compounds **4**, **6g**, **6h**, **6i**, **6l**, **6o**, **6p**-----  
-----S 7-S 26
- (VI) NOE spectra for compound **4**-----S 27-S 31
- (VII) X-Ray crystal structure and data of compound **6h-OH**-----S 32-S 42

### (I) Mechanistic discussion of 2-naphthyl ketone **3**.

Scheme S1 shows a proposed mechanism for formation of 2-naphthyl ketone **3** from epoxide **1b** (see Table 1, entry 7). We envisage that  $\text{PPh}_3\text{AuCl}/\text{AgSbF}_6$  catalyzed 1,3-acetate shift of species **1b** to form allenyl acetate **a-A**, which subsequently undergoes carbocyclization as shown by species **a-B**, ultimately giving desired product **3** through an aromatization of species **s-C** and **s-D**.

Scheme S1

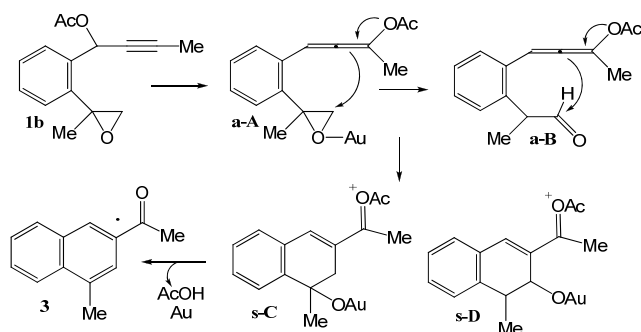

### (II) Experimental procedures for the synthesis of 2-(2-(1-methoxybut-2-ynyl)phenyl)-2-methoxybenzenes:

#### (a) General Sections

Unless otherwise noted, all reactions were carried out under nitrogen atmosphere in oven-dried glasswares using standard syringe and other apparatus. Diethyl ether, tetrahydrofuran, and hexane were dried with sodium benzophenone and distilled before use. Dichloromethane was distilled over  $\text{CaH}_2$  before use. All spectra were run at 400 / 500 / 600 MHz ( $^1\text{H}$  NMR) or 100 / 125 / 150 MHz ( $^{13}\text{C}$  NMR) in  $\text{CDCl}_3$  solution.

#### (b) Typical procedure for the synthesis of 2-(2-(1-methoxybut-2-ynyl)phenyl)-2-methoxybenzenes (**1c**).

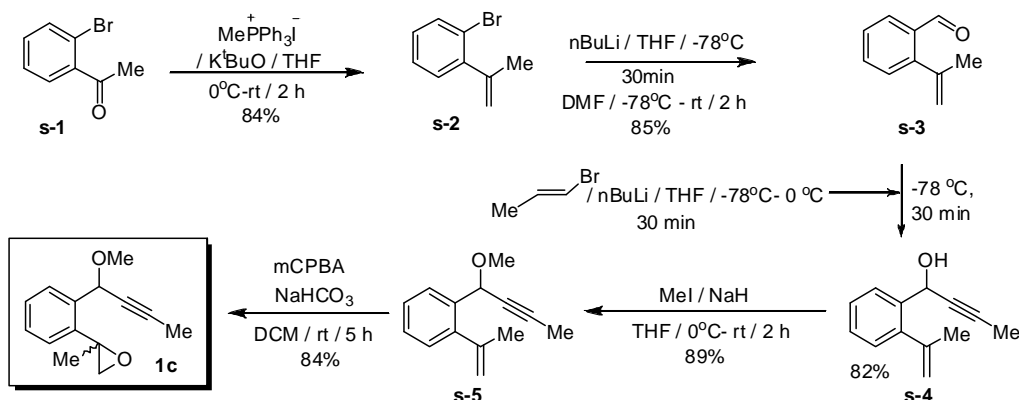

**(1) Synthesis of 1-bromo-2-(prop-1-en-2-yl)benzene (s-2).**

A THF solution of MePPh<sub>3</sub>I (10 g, 24.7 mmol) was cooled to 0 °C, and to this solution was added K<sup>t</sup>BuO (4.16 g, 37.1 mmol). The solution was stirred for 0.5 h at 0 °C, and to this mixture was added 1-(2-bromophenyl)ethanone (2.45 g, 1.66 ml, 12.4 mmol) at the same temperature before it was continued to stir for 2 h. The reaction was quenched with water, extracted with diethyl ether (25 ml). The extract was washed with brine solution, dried over MgSO<sub>4</sub>, and concentrated under reduced pressure. The residue was eluted through a silica column to afford compound **s-2** (2.03 g, 10.3 mmol, 84%) as colorless liquid.

**(2) Synthesis of 2-(prop-1-en-2-yl)benzaldehyde (s-3).**

A THF solution of **s-2** (1.2 g, 6.1 mmol) was cooled to –78 °C, and to this solution was added n-BuLi (2.5 M in hexane, 3.7 ml, 9.2 mmol) slowly. The mixture was stirred for 0.5 h at –78 °C, and to this mixture *N,N*-dimethylformamide (0.89 g, 0.94 ml, 12.2 mmol) was added at the same temperature. The mixture was continued to stir for 2 h at room temperature before it was quenched with water. The organic layer was extracted with diethyl ether (25 ml), washed with brine solution, dried over MgSO<sub>4</sub>, and concentrated under reduced pressure. The residue was eluted through a silica column to afford compound **s-3** (0.76 g, 5.2 mmol, 85%) as yellow liquid.

**(3) Synthesis of 1-(2-(prop-1-en-2-yl)phenyl)but-2-yn-1-ol (s-4).**

A THF solution of 1-bromo-1-propene (0.93 g, 0.7 ml, 7.7 mmol) was cooled to –78 °C, and to this solution was added n-BuLi (2.5 M in hexane, 6.2 ml, 15.4 mmol) slowly. The mixture was warmed to –20 °C, and stirred for 0.5 h. The solution was again cooled to –78 °C before addition of compound **s-3** (0.7 g, 4.8 mmol), and this mixture was stirred for 1 h at room temperature. The reaction was quenched with water, extracted with ethyl acetate (25 ml). The extract was washed with brine solution, dried over MgSO<sub>4</sub>, and concentrated under reduced pressure. The residue was eluted through a silica column to afford compound **s-4** (0.73 g, 3.9 mmol, 82%) as yellow liquid.

**(4) Synthesis of 1-(1-methoxybut-2-ynyl)-2-(prop-1-en-2-yl)benzene (s-5).**

A THF solution of NaH (60%) (0.19 g, 4.7 mmol) was cooled to 0 °C and to this solution was added **s-4** (0.73 g, 3.9 mmol). The mixture was continued to stir for 0.5 h. MeI (2.76 g, 3.0 ml, 19.5 mmol) was added to the mixture and stirred for additional 2 h.

The reaction was quenched with water, extracted with ethyl acetate (25 ml). The extract was washed with brine solution, dried over  $\text{MgSO}_4$ , and concentrated under reduced pressure. The residue was eluted through a silica column to afford compound **s-5** (0.7 g, 3.5 mmol, 89%) as yellow liquid.

**(5) Synthesis of 2-Epoxy-1-(methoxyalk-2-ynyl)benzene(1c).**

mCPBA (0.905 g, 5.2 mmol), and  $\text{NaHCO}_3$  (0.588 g, 7.0 mmol), was added to a DCM solution of **s-5** (0.7 g, 3.5 mmol) and stirred for 5 h. The reaction was quenched with water, extracted with DCM (25 ml). The extract was washed with water, dried over  $\text{MgSO}_4$ , and concentrated under reduced pressure. The residue was eluted through a silica column to afford compound **1c** (0.635 g, 2.9 mmol, 84%) as colorless liquid.

**(c) Typical procedure for the synthesis of trimethyl(1-{2-{2-methyloxiran-2-yl}phenyl}but-2-ynyloxy)silane(1a).**

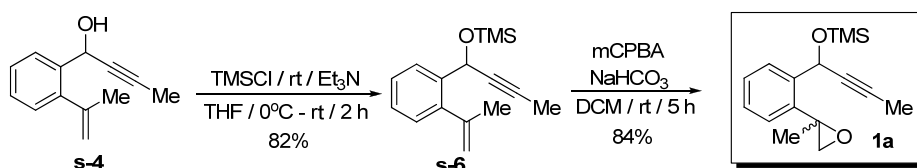

**Synthesis of 1-(2-(prop-1-en-2-yl)phenyl)but-2-ynyl acetate (s-6).**

To alcohol **s-4** (0.73 g, 3.9 mmol) in THF was added  $\text{Et}_3\text{N}$  (1.2 g, 1.6 ml, 11.7 mmol) and trimethylsilylchloride (0.640 g, 0.75 ml, 5.9 mmol) at  $0^\circ\text{C}$ , and the resulting mixture was continued to stir for 2 h. The reaction was quenched with water, extracted with diethyl ether (25 ml). The extract was washed with brine solution, dried over  $\text{MgSO}_4$ , and concentrated under reduced pressure. The residue was eluted through a silica column to afford compound **s-6** (0.622 g, 2.4 mmol, 82%) as yellow liquid.

**(d) Typical procedure for the synthesis of 1-(2-(2-methyloxiran-2-yl)phenyl)but-2-ynyl acetate(1b).**

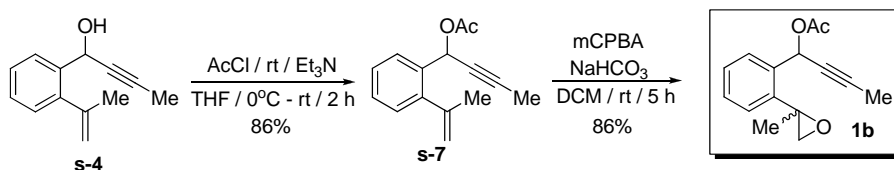

**Synthesis of 1-(2-(prop-1-en-2-yl)phenyl)but-2-ynyl acetate (s-7):**

To alcohol **s-4** (0.73 g, 4.3 mmol) in THF was added  $\text{Et}_3\text{N}$  (1.2 g, 1.6 ml, 11.7 mmol) and acetyl chloride (0.652 g, 0.6 ml, 5.9 mmol) at  $0^\circ\text{C}$ , and the resulting mixture was continued to stir for 2 h. The reaction was quenched with water, extracted with diethyl

ether (25 ml). The extract was washed with brine solution, dried over  $\text{MgSO}_4$ , and concentrated under reduced pressure. The residue was eluted through a silica column to afford compound **s-7** (0.769 g, 3.4 mmol, 86%) as yellow liquid.

### (III) Standard procedure for catalytic operations-----Synthesis of 3,4-dimethyl-2-naphthaldehyde (**4**).

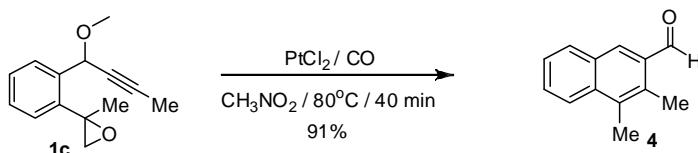

To a long tube containing  $\text{PtCl}_2$  (8.6 mg, 0.03 mmol) was added dry dichloroethane (1.0 ml). To this solution was added a dichloroethane solution (3.0 ml) of epoxide **1c** (100 mg, 0.46 mmol), and the resulting suspension was stirred for 40 min at  $80^\circ\text{C}$ . The solution was concentrated, and eluted through a silica column (hexane) to afford compound **4** (77.4 mg, 0.42 mmol, 91%) as a yellow liquid.

### (IV) Synthetic route for 2-(2-(1-methoxybut-2-ynyl)phenyl)propanal (**8**).

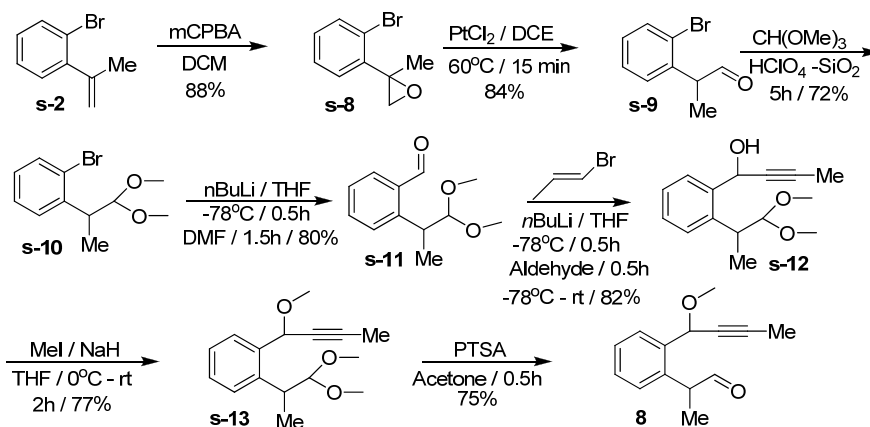

#### (a) Synthesis of 2-(2-bromophenyl)-2-methyloxirane (**s-8**):

$\text{mCPBA}$  (1.3 g, 7.6 mmol), and  $\text{NaHCO}_3$  (0.85 g, 10.2 mmol), was added to a DCM solution of **s-2** (1.0 g, 5.1 mmol) and stirred for 5 h. The reaction was quenched with water, extracted with DCM (25 ml). The extract was washed with water, dried over  $\text{MgSO}_4$ , and concentrated under reduced pressure. The residue was eluted through a silica column to afford compound **s-8** (0.95 g, 4.4 mmol, 88%) as colorless liquid.

#### (b) Synthesis of 2-(2-bromophenyl)propanal (**s-9**):

To a round bottom flask containing  $\text{PtCl}_2$  (25 mg, 0.09 mmol) was added dry dichloroethane (5.0 ml). To this solution was added a dichloroethane solution (5.0 ml) of

**s-8** (200 mg, 0.9 mmol), and the resulting suspension was stirred for 15 min at 60°C. The solution was passed through a celite bed and concentrated under reduced pressure to afford compound **s-9** (168 mg, 0.78 mmol, 84%).

**(c) Synthesis of 1-bromo-2-(1,1-dimethoxypropan-2-yl)benzene (s-10):**

HClO<sub>4</sub>-SiO<sub>2</sub> was added in catalytic amount to a trimethylorthoformate solution of **s-9** (0.4 g, 1.8 mmol) and stirred for 5 h. The reaction was quenched with water, extracted with ethyl acetate. The extract was washed with water, dried over K<sub>2</sub>CO<sub>3</sub>, and concentrated under reduced pressure. The residue was eluted through a neutral silica column to afford compound **s-10** (0.35 g, 1.35 mmol, 72%) as colorless liquid.

**(d) Synthesis of 2-(1,1-dimethoxypropan-2-yl)benzaldehyde (s-11):**

A THF solution of **s-10** (0.9 g, 3.5 mmol) was cooled to -78 °C, and to this solution was added n-BuLi (2.5 M in hexane, 2.1 ml, 5.2 mmol) slowly. The mixture was stirred for 0.5 h at -78 °C, and to this mixture *N,N*-dimethylformamide (0.5 g, 0.54 ml, 6.9 mmol) was added at the same temperature. The mixture was continued to stir for 1.5 h at room temperature before it was quenched with water. The organic layer was extracted with diethyl ether (25 ml), washed with water, dried over K<sub>2</sub>CO<sub>3</sub>, and concentrated under reduced pressure. The residue was eluted through a neutral silica column to afford compound **s-11** (0.578 g, 2.7 mmol, 80%) as yellow liquid.

**(e) Synthesis of 1-(2-(1,1-dimethoxypropan-2-yl)phenyl)but-2-yn-1-ol (s-12):**

A THF solution of 1-bromo-1-propene (0.3 g, 0.21 ml, 2.4 mmol) was cooled to -78 °C, and to this solution was added n-BuLi (2.5 M in hexane, 1.9 ml, 4.9 mmol) slowly. The mixture was warmed to -20 °C, and stirred for 0.5 h. The solution was again cooled to -78 °C before addition of compound **s-11** (0.32 g, 1.5 mmol), and this mixture was stirred for 0.5 h at room temperature. The reaction was quenched with water, extracted with ethyl acetate (25 ml). The extract was washed with water, dried over K<sub>2</sub>CO<sub>3</sub>, and concentrated under reduced pressure. The residue was eluted through a neutral silica column to afford compound **s-12** (0.31 g, 1.25 mmol, 82%) as yellow liquid.

**(f) Synthesis of 1-(2-(1,1-dimethoxypropan-2-yl)phenyl)-2-(1-methoxybut-2-ynyl) (s-13):**

A THF solution of NaH (60%) (0.08 g, 2.1 mmol) was cooled to 0°C and to this solution was added **s-12** (0.4 g, 1.6 mmol). The mixture was continued to stir for 0.5 h.

MeI (1.14 g, 1.22 ml, 8.0 mmol) was added to the mixture and stirred for additional 2 h. The reaction was quenched with water, extracted with ethyl acetate (25 ml). The extract was washed with water, dried over  $K_2CO_3$ , and concentrated under reduced pressure. The residue was eluted through a neutral silica column to afford compound **s-13** (0.32 g, 1.24 mmol, 77%) as yellow liquid.

**(g) Synthesis of 2-(2-(1-methoxybut-2-ynyl)phenyl)propanal (8):**

PTSA (0.04 g, 0.02 mmol) was added to a acetone solution of s-13 (0.1 g, 0.4 mmol) and stirred for 0.5 h. After completion acetone was removed under reduced pressure. Residue was diluted with ethyl acetate, washed with water, dried over  $K_2CO_3$ , and concentrated under reduced pressure. The residue was eluted through a neutral silica column to afford compound **8** (0.06 g, 0.27 mmol, 75%) as yellow liquid.

**(V) Spectral data for all compounds.**

Spectral data for trimethyl(1-{2-{2-methyloxiran-2-yl}phenyl}but-2-ynyloxy)silane(**1a**).

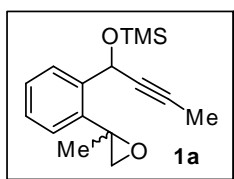

Yellow liquid ; IR (neat,  $cm^{-1}$ ): 3035 (s), 2105 (s), 1582 (s), 1450 (s), 1262(s), 1253 (s), 1150, 1022(s), (s), 890 (s), 810 (s);  $^1H$  NMR (400 MHz ,  $CDCl_3$ ): Major isomer:  $\delta$  7.67 (t,  $J = 7.4$  Hz, 1 H), 7.38 - 7.22 (m, 3 H), 5.86 (d,  $J = 1.4$  Hz, 1 H), 2.97 - 2.94 (m, 2 H), 1.80 (s, 3 H), 1.65 (s, 3 H), 0.16 (s, 9H) ; Minor isomer (selected peaks):  $\delta$  5.77 (d,  $J = 1.4$  Hz, 1 H), 2.89 - 2.87 (m, 2 H), 1.81 (s, 3 H), 0.17 (s, 9H);  $^{13}C$  NMR (100 MHz,  $CDCl_3$ ):  $\delta$  139.8, 139.3, 137.8, 137.3, 128.0 (2x CH), 127.8, 127.6, 127.3, 127.2, 127.1, 126.9, 82.5, 82.3, 80.3, 80.1, 61.4, 61.1, 58.0, 57.8, 55.1, 54.8, 24.8, 24.6, 3.7 (2x $CH_3$ ), 0.34 (3x $CH_3$ ), 0.26 (3x $CH_3$ ); HRMS calcd for  $C_{16}H_{22}O_2Si$ : 274.1389; found: 274.1390.

Spectral data for 1-(2-{2-methyloxiran-2-yl}phenyl)but-2-ynyl acetate(**1b**).

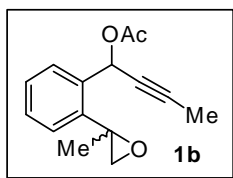

Yellow liquid ; IR (neat,  $\text{cm}^{-1}$ ): 3033 (s), 2101 (s), 1720 (s), 1588 (s), 1450 (s), 1255 (s), 1020(s), 1150 (s), 888 (s), 810 (s);  $^1\text{H}$  NMR (400 MHz,  $\text{CDCl}_3$ ): Major isomer:  $\delta$  7.63 (dt,  $J = 3.2, 5.8$  Hz, 1 H), 7.4 (dt,  $J = 2.0, 5.4$  Hz, 1 H), 7.35 - 7.28 (m, 2 H), 6.70 (q,  $J = 2.2$  Hz, 1 H), 2.98 ( $d_{a,b}$ ,  $J = 5.2$  Hz, 2 H), 2.08 (s, 3H), 1.83 (d,  $J = 2.2$  Hz, 3 H), 1.60 (s, 3 H) ; Minor isomer (selected peaks):  $\delta$  6.72 (q,  $J = 2.2$  Hz, 1 H), 2.93 ( $d_{a,b}$ ,  $J = 5.1$  Hz, 2 H), 2.06 (s, 3H), 1.84 (d,  $J = 2.3$  Hz, 3 H), 1.63 (s, 3 H) ;  $^{13}\text{C}$  NMR (100 MHz,  $\text{CDCl}_3$ ):  $\delta$  169.7, 169.5, 138.9, 138.7, 135.1, 134.8, 128.8, 128.7, 128.2, 128.1, 127.6 (2xCH), 127.5, 127.0, 83.9, 83.8, 76.2 (2xC), 62.6, 62.5, 57.4, 57.3, 54.8, 54.6, 24.6, 24.3, 21.0 (2x $\text{CH}_3$ ), 3.7 (2x $\text{CH}_3$ ); HRMS calcd for  $\text{C}_{15}\text{H}_{16}\text{O}_3$ : 244.1099; found: 244.1098.

Spectral data for 2-(2-(1-methoxybut-2-ynyl)phenyl)-2-methyloxirane(**1c**).

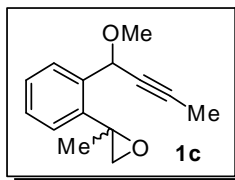

Yellow liquid ; IR (neat,  $\text{cm}^{-1}$ ): 3030 (s), 2109 (s), 1555 (s), 1451 (s), 1251 (s), 1150 (s), 1050 (s), 888 (s), 812 (s);  $^1\text{H}$  NMR (400 MHz,  $\text{CDCl}_3$ ): (1:1) Mixture of isomers:  $\delta$  7.65 - 7.62 (m, 2 H), 7.47 - 7.44 (m, 1 H), 7.37 - 7.23 (m, 5 H), 5.40 (t,  $J = 2.0$  Hz, 1 H), 5.35 (d,  $J = 2.2$  Hz, 1 H), 3.40 (s, 3 H), 3.39 (s, 3 H), 2.95 - 2.93 (m, 2H), 2.89 ( $d_{a,b}$ ,  $J = 5.2$  Hz, 1 H), 2.87 ( $d_{a,b}$ ,  $J = 5.2$  Hz, 1 H), 1.86 (d,  $J = 2.1$  Hz, 3 H), 1.84 (d,  $J = 2.2$  Hz, 3 H), 1.61 (s, 6 H) ;  $^{13}\text{C}$  NMR (100 MHz,  $\text{CDCl}_3$ ):  $\delta$  138.9, 138.7, 136.6, 136.4, 127.9 (2xCH), 127.8, 127.6, 127.5, 127.4, 127.1 (2xCH), 83.7(2xC), 77.3 (2xC), 69.6, 69.4, 57.8, 57.7, 55.9 (2x $\text{OCH}_3$ ), 54.6, 54.5, 24.6 (2x $\text{CH}_3$ ), 3.5 (2x $\text{CH}_3$ ); HRMS calcd for  $\text{C}_{14}\text{H}_{16}\text{O}_2$ : 216.1150; found: 216.1148.

Spectral data for 2-(2-(1-methoxy-3-phenylprop-2-ynyl)phenyl)-2-methyloxirane(**5a**).

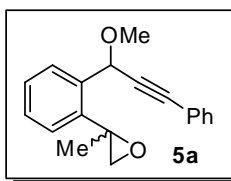

Yellow liquid ; IR (neat,  $\text{cm}^{-1}$ ): 3036 (s), 2107 (s), 1584 (s), 1455 (s), 1253 (s), 1151 (s), 1048 (s), 893 (s), 812 (s);  $^1\text{H}$  NMR (400 MHz,  $\text{CDCl}_3$ ): (1:1) Mixture of isomers :  $\delta$  7.79 - 7.76 (m, 2 H), 7.48 - 7.29 (m, 16 H), 5.74 (s, 1 H), 5.66 (s, 1 H), 3.54 (s, 3 H), 3.53 (s, 3 H), 3.03 - 2.93 (m, 4 H), 1.70 (s, 3 H), 1.69 (s, 3 H) ;  $^{13}\text{C}$  NMR (100 MHz,  $\text{CDCl}_3$ ):  $\delta$



139.1, 138.9, 136.1, 136.0, 131.8, 131.7 (2xCH), 131.6 (2xCH), 128.5 (3xCH), 128.2 (6xCH), 128.0, 127.7, 127.4 (2xCH), 122.5, 122.4, 87.6, 87.5, 86.9, 86.7, 70.0, 69.8, 58.0, 57.8, 56.3 (2xOCH<sub>3</sub>), 54.7 (2xCH<sub>2</sub>), 24.8, 24.7; HRMS calcd for C<sub>19</sub>H<sub>18</sub>O<sub>2</sub>: 278.1307; found: 278.1309.

Spectral data for 2-(2-(1-methoxyhex-2-ynyl)phenyl)-2-methyloxirane(**5b**).

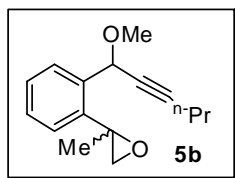

Yellow liquid ; IR (neat, cm<sup>-1</sup>): 3030 (s), 2100 (s), 1596 (s), 1454 (s), 1251 (s), 1153 (s), 1049 (s), 893 (s), 815 (s); <sup>1</sup>H NMR (400 MHz, CDCl<sub>3</sub>): (1:1) Mixture of isomers: δ 7.66 (t, *J* = 6.0 Hz, 2 H), 7.38 (t, *J* = 6.1 Hz, 2 H), 7.33 - 7.25 (m, 4 H), 5.45 (s, 1 H), 5.38 (s, 1H), 3.43 (s, 3H), 3.41 (s, 3H), 2.97 - 2.96 (m, 2 H), 2.95 - 2.87 (m, 2 H), 2.24 - 2.17 (m, 4 H), 1.63 (s, 6 H), 1.57 - 1.46 (m, 4 H), 0.99 - 0.94 (m, 6 H); <sup>13</sup>C NMR (100 MHz, CDCl<sub>3</sub>): δ 139.0, 138.8, 136.7, 136.5, 128.2, 128.0, 127.9, 127.7, 127.6, 127.5, 127.2, 127.1, 88.3 (2xC), 78.0, 77.8, 69.6, 69.5, 57.9, 57.8, 55.9 (2xOCH<sub>3</sub>), 54.7, 54.6, 24.6 (2xCH<sub>3</sub>), 21.9, 21.8, 20.7 (2xCH<sub>2</sub>), 13.4 (2xCH<sub>3</sub>); HRMS calcd for C<sub>16</sub>H<sub>20</sub>O<sub>2</sub>: 244.1463; found: 244.1465.

Spectral data for 2-(2-(1-methoxyprop-2-ynyl)phenyl)-2-methyloxirane(**5c**).

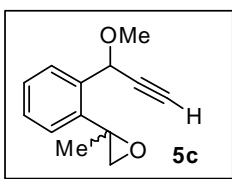

Yellow liquid ; IR (neat, cm<sup>-1</sup>): 3100 (s), 2105 (s), 1599 (s), 1452 (s), 1251 (s), 1150 (s), 1050 (s), 893 (s), 815 (s); <sup>1</sup>H NMR (600 MHz, CDCl<sub>3</sub>): (1:1) Mixture of isomers: δ 7.68 (d, *J* = 1.2 Hz, 2 H), 7.38 - 7.29 (m, 6 H), 5.50 (d, *J* = 1.9 Hz, 1 H), 5.42 (d, *J* = 2.0 Hz, 1 H), 3.46 (s, 6 H), 2.97 - 2.87 (m, 4 H), 2.63 (d, *J* = 2.1 Hz, 1 H), 2.62 (d, *J* = 2.2 Hz, 1 H), 1.63 (s, 6 H) ; <sup>13</sup>C NMR (150 MHz, CDCl<sub>3</sub>): δ 139.0, 138.8, 135.6, 135.4, 128.5 (2xCH), 128.0, 127.9, 127.7, 127.5, 127.3 (2xCH), 81.5, 81.3, 75.7, 75.6, 69.2, 68.9, 57.9, 57.7, 56.2 (2xOCH<sub>3</sub>), 54.5 (2xCH<sub>2</sub>), 24.7, 24.6; HRMS calcd for C<sub>13</sub>H<sub>14</sub>O<sub>2</sub>: 202.0994; found: 202.0996.

Spectral data for 2-butyl-2-(2-{1-methoxyprop-2-ynyl}phenyl)-2-methyloxirane(**5d**).

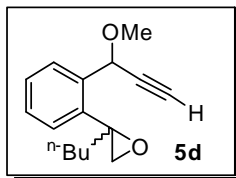

Yellow liquid ; IR (neat,  $\text{cm}^{-1}$ ): 3095 (s), 2110 (s), 1600 (s), 1452 (s), 1253 (s), 1150 (s), 1050 (s), 887 (s), 815 (s);  $^1\text{H}$  NMR (400 MHz,  $\text{CDCl}_3$ ): (1:1) Mixture of isomers:  $\delta$  7.69 - 7.66 (m, 2 H),  $\delta$  7.35 - 7.26 (m, 6 H), 5.43 (d,  $J = 1.8$  Hz, 1 H), 5.39 (d,  $J = 2.0$  Hz, 1 H), 3.45 (s, 3 H), 3.44 (s, 3 H), 2.99 - 2.96 (m, 2 H), 2.86 - 2.82 (m, 2 H), 2.60 (d,  $J = 2.1$  Hz, 1 H), 2.59 (d,  $J = 2.2$  Hz, 1 H), 1.94 - 1.76 (m, 4 H), 1.29 - 1.26 (m, 8 H), 0.92 - 0.75 (m, 6 H);  $^{13}\text{C}$  NMR (100 MHz,  $\text{CDCl}_3$ ):  $\delta$  137.9, 137.7, 136.2, 135.9, 128.2 (4xCH), 128.1, 128.0, 127.8, 127.6, 81.8, 81.5, 75.4 (2xCH), 69.3, 69.0, 60.6, 60.5, 56.3 (2xOCH<sub>3</sub>), 53.2 (2xCH<sub>2</sub>), 37.1 (2xCH<sub>2</sub>), 26.8 (2xCH<sub>2</sub>), 22.6 (2xCH<sub>2</sub>), 13.8 (2xCH<sub>3</sub>); HRMS calcd for  $\text{C}_{16}\text{H}_{20}\text{O}_2$ : 244.1463; found: 244.1466.

Spectral data for 2-(2-{1-methoxybut-2-ynyl}phenyl)-2-phenyloxirane(**5e**).

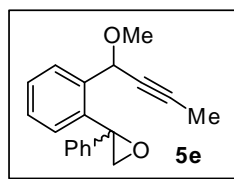

Yellow liquid ; IR (neat,  $\text{cm}^{-1}$ ): 3015 (s), 2112 (s), 1601 (s), 1454 (s), 1255 (s), 1150 (s), 1050 (s), 881 (s), 815 (s);  $^1\text{H}$  NMR (400 MHz,  $\text{CDCl}_3$ ): (1:1) Mixture of isomers:  $\delta$  7.76 (dd,  $J = 1.0, 7.6$  Hz, 2 H), 7.00 - 7.18 (m, 16 H), 5.20 (d,  $J = 2.1$  Hz, 1 H), 5.16 (d,  $J = 2.0$  Hz, 1 H), 3.42 (d<sub>a,b</sub>,  $J = 5.7$  Hz, 1 H), 3.40 (d<sub>a,b</sub>,  $J = 5.7$  Hz, 1 H), 3.32 (s, 3 H), 3.26 (d<sub>a,b</sub>,  $J = 5.7$  Hz, 1 H), 3.22 (d<sub>a,b</sub>,  $J = 5.7$  Hz, 1 H), 3.00 (s, 3 H), 1.86 (d,  $J = 2.2$  Hz, 3 H), 1.68 (d,  $J = 3.2$  Hz, 3 H);  $^{13}\text{C}$  NMR (100 MHz,  $\text{CDCl}_3$ ):  $\delta$  139.9, 139.6, 139.1, 138.7, 136.2, 135.7, 128.9 (2xCH), 128.8 (2xCH), 128.3 - 128.0 (7xCH), 127.7 (2xCH), 127.4, 126.0 (2xCH), 125.9 (2xCH), 83.3 (2xC), 77.3 (2xC), 69.6 (2xCH), 60.6, 60.3, 57.6, 57.5, 56.5, 55.9, 3.7, 3.5; HRMS calcd for  $\text{C}_{19}\text{H}_{18}\text{O}_2$ : 278.1307; found: 278.1305.

Spectral data for 2-butyl-2-(2-{1-methoxybut-2-ynyl}phenyl)oxirane(**5f**).

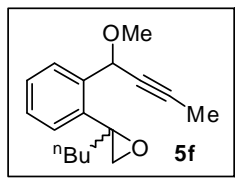

Yellow liquid ; IR (neat,  $\text{cm}^{-1}$ ): 3020 (s), 2100 (s), 1597 (s), 1458 (s), 1255 (s), 1156 (s), 1090 (s), 881 (s), 815 (s);  $^1\text{H}$  NMR (400 MHz,  $\text{CDCl}_3$ ): (1:1) Mixture of isomers:  $\delta$  7.66 - 7.63 (m, 2 H),  $\delta$  7.33 - 7.23 (m, 6 H),  $\delta$  5.34 - 5.32 (m, 2 H), 3.41 (s, 3 H), 3.38 (s, 3 H), 2.97 (d<sub>a,b</sub>,  $J = 5.3$  Hz, 2 H), 2.86 (d<sub>a,b</sub>,  $J = 5.3$  Hz, 1 H), 2.82 (d<sub>a,b</sub>,  $J = 5.3$  Hz, 1 H), 1.98 - 1.73 (m, 10 H), 1.28 - 1.25 (m, 8 H), 0.84 - 0.81 (m, 6 H);  $^{13}\text{C}$  NMR (100 MHz,  $\text{CDCl}_3$ ):  $\delta$  137.7, 137.5, 137.1, 136.8, 128.0 (2xCH), 127.9 (3xCH), 127.8, 127.5 (2xCH), 83.5 (2xC), 77.3 (2xC), 69.6, 69.3, 60.5 (2xC), 56.1 (2xOCH<sub>3</sub>), 53.2 (2xCH<sub>2</sub>), 37.0 (2xCH<sub>2</sub>), 26.8 (2xCH<sub>2</sub>), 22.6 (2xCH<sub>2</sub>), 13.7 (2xCH<sub>3</sub>), 3.6 (2xCH<sub>3</sub>); HRMS calcd for  $\text{C}_{17}\text{H}_{22}\text{O}_2$ : 258.1620; found: 258.1623.

Spectral data for 2-(2-(1-methoxybut-2-ynyl)phenyl)-2,3-dimethyloxirane(**5g**).

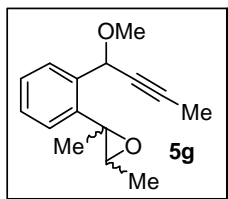

Yellow liquid ; IR (neat,  $\text{cm}^{-1}$ ): 3033 (s), 2109 (s), 1581 (s), 1457 (s), 1253 (s), 1150 (s), 1048 (s), 881 (s), 815 (s);  $^1\text{H}$  NMR (400 MHz,  $\text{CDCl}_3$ ), Major isomer:  $\delta$  7.67 - 7.65 (m, 1 H), 7.40 - 7.36 (m, 1 H), 7.32 - 7.20 (m, 2 H), 5.06 (s, 1 H), 3.43 (s, 3 H), 3.21 - 3.19 (m, 1 H), 1.85 (s, 3 H), 1.56 (s, 3 H), 0.96 (s, 3 H);  $^{13}\text{C}$  NMR (100 MHz,  $\text{CDCl}_3$ ):  $\delta$  140.9, 139.4, 137.9, 137.4, 136.8, 136.1, 135.5, 128.7, 128.5, 128.1, 127.9, 127.8, 127.7, 127.6, 127.4, 127.3, 127.2, 127.1, 126.8, 126.7, 126.5, 83.6, 83.5, 82.3, 78.6, 77.3, 77.2, 77.0, 76.8, 76.7, 69.7, 69.6, 69.5, 69.4, 69.3, 68.0, 63.1, 62.7, 61.9, 61.8, 61.1, 61.0, 59.7, 59.5, 59.4, 56.2, 55.9, 55.8, 55.7, 25.7, 25.2, 25.0, 19.6, 19.5, 16.1, 15.0, 14.9, 13.8, 13.7, 3.5, 3.4; HRMS calcd for  $\text{C}_{15}\text{H}_{18}\text{O}_2$ : 230.1307, found: 230.1309.

Spectral data for 3-ethyl-2-(2-(1-methoxybut-2-ynyl)phenyl)-2-methyloxirane(**5h**).

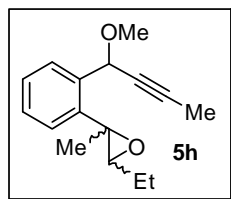

Yellow liquid ; IR (neat,  $\text{cm}^{-1}$ ): 3030 (s), 2106 (s), 1584 (s), 1454 (s), 1260 (s), 1150 (s), 1048 (s), 880 (s), 813 (s);  $^1\text{H}$  NMR (400 MHz,  $\text{CDCl}_3$ ), Major isomer:  $\delta$  7.68 - 7.67 (m, 1 H), 7.39 - 7.37 (m, 1 H), 7.31 - 7.27 (m, 2 H), 5.08 - 5.09 (m, 1 H), 3.46 (s, 3 H), 3.07 -

3.04 (m, 1 H), 1.91 - 1.80 (m, 5 H), 1.57 (s, 3 H), 0.98 - 0.89 (m, 3 H); Selected peaks of others isomers:  $\delta$  7.77 - 7.82 (m, 1 H), 7.59 - 7.57 (m, 1 H), 7.09 - 7.05 (m, 2 H), 5.78 (s, 1 H), 5.71 (s, 1 H), 5.02 (s, 1 H), 3.45 (s, 3 H), 1.61 (s, 3 H);  $^{13}\text{C}$  NMR (100 MHz,  $\text{CDCl}_3$ ) :  $\delta$  138.0, 137.9, 137.3, 136.9, 136.7, 135.6, 128.7, 128.2, 128.1, 127.9, 127.8, 127.7, 127.6, 127.4, 127.3, 126.9, 83.9, 83.7, 69.8, 69.7, 69.6, 68.3, 67.0, 65.5, 65.3, 62.3, 62.2, 56.4, 55.9, 26.0, 25.5, 25.3, 23.8, 22.9, 22.8, 10.5, 10.4, 3.6; HRMS calcd for  $\text{C}_{16}\text{H}_{20}\text{O}_2$ : 244.1463, found: 244.1465.

Spectral data for 3-ethyl-2-(2-(1-methoxyprop-2-ynyl)phenyl)-2-methyloxirane(**5i**).

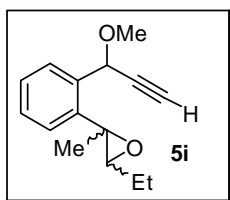

Yellow liquid ; IR (neat,  $\text{cm}^{-1}$ ): 3044 (s), 2107 (s), 1581 (s), 1451 (s), 1251 (s), 1150 (s), 1049 (s), 881 (s), 810 (s);  $^1\text{H}$  NMR (400 MHz,  $\text{CDCl}_3$ ), Major isomer:  $\delta$  7.71 - 7.67 (m, 1 H), 7.42 - 7.39 (m, 1 H), 7.32 - 7.29 (m, 2 H), 5.13 (s, 1 H), 3.49 (s, 3 H), 3.09 - 3.06 (m, 1 H), 2.54 (s, 1 H), 1.61 (s, 3 H), 1.40 - 1.35 (m, 2 H), 0.97 - 0.86 (m, 3 H); Selected peaks of others isomers:  $\delta$  7.81 (d,  $J = 7.1$  Hz, 1 H), 7.61 (d,  $J = 7.0$  Hz, 1 H), 7.11 - 7.07 (m, 2 H), 5.85 (s, 1 H), 5.78 (s, 1 H), 5.07 (s, 1 H), 3.43 (s, 3 H), 2.95 - 2.89 (m, 1 H), 2.54 (s, 1 H), 1.58 (s, 3 H);  $^{13}\text{C}$  NMR (100 MHz,  $\text{CDCl}_3$ ) :  $\delta$  138.3, 138.0, 137.4, 137.1, 136.9, 136.1, 135.6, 134.5, 129.0, 128.6, 128.2, 128.0, 127.9, 127.8, 127.7, 127.6, 127.4, 127.3, 127.0, 83.2, 81.7, 81.5, 81.2, 75.8, 75.7, 75.6, 74.4, 69.5, 69.3, 69.2, 67.9, 66.9, 65.5, 65.4, 63.8, 63.3, 62.2, 62.0, 56.7, 56.6, 56.1, 25.9, 25.5, 25.2, 23.8, 23.7, 22.8, 22.7, 10.4, 10.3, 10.2; HRMS calcd for  $\text{C}_{15}\text{H}_{18}\text{O}_2$ : 230.1307, found: 230.1309.

Spectral data for 2-(4-fluoro-2-{1-methoxybut-2-ynyl}methyl)oxirane(**5j**).

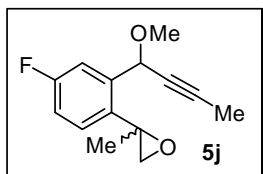

Yellow liquid ; IR (neat,  $\text{cm}^{-1}$ ): 3065 (s), 2110 (s), 1602 (s), 1455 (s), 1256 (s), 1159 (s), 1132 (s), 1100 (s), 881 (s), 816 (s), 768 (s), 288 (s);  $^1\text{H}$  NMR (400 MHz,  $\text{CDCl}_3$ ): (1:1) Mixture of isomers:  $\delta$  7.34 - 7.30 (m, 4 H),  $\delta$  6.94 - 6.90 (m, 2 H), 5.36 (s, 1 H), 5.31 (s, 1

H), 3.39 (s, 3 H), 3.37 (s, 3 H), 2.92 - 2.90 (m, 2 H), 2.84 (d<sub>a,b</sub>,  $J = 5.1$  Hz, 1 H), 2.80 (d<sub>a,b</sub>,  $J = 5.1$  Hz, 1 H), 1.85 (d,  $J = 1.6$  Hz, 3 H), 1.83 (d,  $J = 1.7$  Hz, 3 H), 1.57 (s, 6 H);  $^{13}\text{C}$  NMR (100 MHz,  $\text{CDCl}_3$ ):  $\delta$  162.1 (d,  $J_{\text{CF}} = 245.0$  Hz, 2 C), 139.1 (d,  $J_{\text{CF}} = 21.0$  Hz, 2C), 134.8 (d,  $J_{\text{CF}} = 23.0$  Hz, 2 C), 129.2 - 129.0 (2xC), 115.2, 114.9, 114.6 - 114.0 (2xCH), 84.2 (2xC), 76.4 (2xC), 69.1, 68.9, 57.4, 57.2, 56.0 (2xOCH<sub>3</sub>), 54.6 (2xCH<sub>2</sub>), 24.6 (2xCH<sub>3</sub>), 3.5 (2xCH<sub>3</sub>); HRMS calcd for  $\text{C}_{14}\text{H}_{15}\text{FO}_2$ : 234.1056; found: 234.1060.

.Spectral data for 2-(5-fluoro-2-{1-methoxybut-2-ynyl}methyl)oxirane(**5k**).

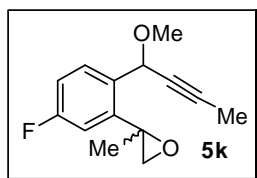

Yellow liquid ; IR (neat,  $\text{cm}^{-1}$ ): 3070 (s), 2112 (s), 1585 (s), 1457 (s), 1251 (s), 1159 (s), 1133 (s), 1100 (s), 881 (s), 820 (s), 769 (s), 288 (s);  $^1\text{H}$  NMR (400 MHz,  $\text{CDCl}_3$ ): (1:1) Mixture of isomers:  $\delta$  7.63 - 7.59 (m, 2 H), 7.08 - 6.94 (m, 4 H), 5.33 (d,  $J = 1.5$  Hz, 1 H), 5.27 (d,  $J = 1.6$  Hz, 1 H), 3.39 (s, 3 H), 3.37 (s, 3 H), 2.95 - 2.92 (m, 2 H), 2.86 (d<sub>a,b</sub>,  $J = 5.2$  Hz, 1H), 2.84 (d<sub>a,b</sub>,  $J = 5.2$  Hz, 1H), 1.85 (d,  $J = 1.9$  Hz, 3 H), 1.84 (d,  $J = 1.7$  Hz, 3 H), 1.60 (s, 3 H), 1.59 (s, 3 H);  $^{13}\text{C}$  NMR (100 MHz,  $\text{CDCl}_3$ ):  $\delta$  162.1 (d,  $J_{\text{CF}} = 246.0$  Hz, 2 C), 141.3 (d,  $J_{\text{CF}} = 15.0$  Hz, 2 C), 132.5 (2xC), 129.8 (d,  $J_{\text{CF}} = 18.0$  Hz, 2 CH), 114.8 (d,  $J_{\text{CF}} = 21.0$  Hz, 2 CH), 114.1 (d,  $J_{\text{CF}} = 22.0$  Hz, 2 CH), 84.0 (2xC), 76.6 (2xC), 69.1, 68.9, 57.4, 57.2, 55.9 (2xCH<sub>2</sub>), 54.6, 54.5, 24.2, 24.1, 3.4 (2xCH<sub>3</sub>); HRMS calcd for  $\text{C}_{14}\text{H}_{15}\text{FO}_2$ : 234.1056; found: 234.1060.

Spectral data for 2-(5-methoxy-2-{1-methoxybut-2-ynyl}methyl)oxirane(**5l**).

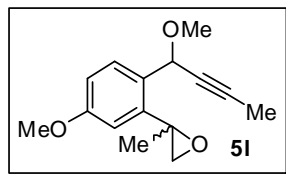

Yellow liquid ; IR (neat,  $\text{cm}^{-1}$ ): 3045 (s), 2106 (s), 1599 (s), 1454 (s), 1256 (s), 1154 (s), 1072 (s), 881 (s), 817 (s);  $^1\text{H}$  NMR (400 MHz,  $\text{CDCl}_3$ ): (1:1) Mixture of isomers:  $\delta$  7.55 (d,  $J = 8.6$  Hz, 2 H), 6.89 (dd,  $J = 2.4, 6.0$  Hz, 2 H), 6.82 (d,  $J = 8.5$  Hz, 2 H), 5.31 (s, 1 H), 5.25 (s, 1 H), 3.75 (s, 6 H), 3.37 (s, 3 H), 3.35 (s, 3 H),  $\delta$ 2.94 - 2.92 (m, 2 H),  $\delta$ 2.88 - 2.85 (m, 2 H), 1.85 (d,  $J = 1.9$  Hz, 3 H), 1.84 (d,  $J = 1.3$  Hz, 3 H), 1.60 (s, 6 H);  $^{13}\text{C}$  NMR

(100 MHz, CDCl<sub>3</sub>):  $\delta$  159.3 (2xC), 140.4, 140.3, 129.2, 129.1, 128.6 (2xC), 113.7, 113.5, 112.0 (2xCH), 83.5, 83.4, 77.3 (2xC), 69.2, 69.1, 57.8, 57.6, 55.7 (2xOCH<sub>3</sub>), 55.1 (2xOCH<sub>3</sub>), 54.7, 54.6, 24.5, 24.4. 3.5 (2xCH<sub>3</sub>); HRMS calcd for C<sub>15</sub>H<sub>18</sub>O<sub>3</sub>: 246.1256; found: 246.1254.

Spectral data for 5-(1-methoxybut-2-ynyl)-6-(2-methyloxiran-2-yl)benzo[*d*][1,3]dioxole(**5m**).

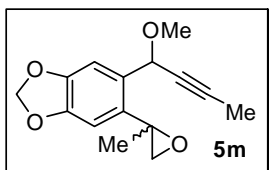

Yellow liquid ; IR (neat, cm<sup>-1</sup>): 3051 (s), 2102 (s), 1601 (s), 1454 (s), 1256 (s), 1153 (s), 1072 (s), 881 (s), 817 (s); <sup>1</sup>H NMR (400 MHz , CDCl<sub>3</sub>): (1:1) Mixture of isomers:  $\delta$  7.08 (s, 2 H), 6.81 (s, 2 H), 5.89 (s, 4 H), 5.27 (q, *J* = 2.1 Hz, 1 H), 5.24 (q, *J* = 2.1 Hz, 1 H), 3.37 (s, 3 H), 3.35 (s, 3 H),  $\delta$ 2.92 - 2.90 (m, 2 H),  $\delta$ 2.87 (d<sub>a,b</sub>, *J* = 5.3 Hz, 1 H),  $\delta$ 2.83 (d<sub>a,b</sub>, *J* = 5.3 Hz, 1 H), 1.86 (d, *J* = 2.1 Hz, 3 H), 1.85 (d, *J* = 2.2 Hz, 3 H), 1.57 (s, 3 H), 1.56 (s, 3 H); <sup>13</sup>C NMR (100 MHz, CDCl<sub>3</sub>):  $\delta$  147.3 (2xC), 147.2 (2xC), 133.1, 132.9, 130.6, 130.5, 107.6, 107.5, 107.2, 107.1, 101.1 (2xCH<sub>2</sub>), 83.5 (2xC), 77.3 (2xC), 69.2, 69.1, 57.6 (2xC), 56.0, 55.9, 54.8 (2xCH<sub>2</sub>), 24.7 (2xCH<sub>3</sub>), 3.5 (2xCH<sub>3</sub>); HRMS calcd for C<sub>15</sub>H<sub>16</sub>O<sub>4</sub>: 260.1049; found: 260.1050.

Spectral data for 5-(1-methoxyprop-2-ynyl)-6-(oxiran-2-yl)benzo[*d*][1,3]dioxole(**5n**).

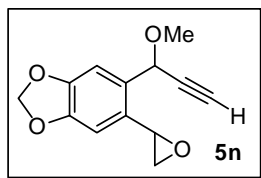

Yellow liquid ; IR (neat, cm<sup>-1</sup>): 3066 (s), 2110 (s), 1586 (s), 1471 (s), 1259 (s), 1152 (s), 1076 (s), 889 (s), 817 (s); <sup>1</sup>H NMR (400 MHz , CDCl<sub>3</sub>): (1:1) Mixture of isomers:  $\delta$  7.08 (s, 1 H), 7.06 (s, 1 H), 6.73 (s, 1 H), 6.72 (s, 1 H), 5.91 (d, *J* = 1.2 Hz, 2 H), 5.90 (d, *J* = 1.4 Hz, 2 H), 5.23 (d, *J* = 1.8 Hz, 1 H), 5.22 (d, *J* = 1.8 Hz, 1 H), 4.14 - 4.13 (m, 1 H), 4.08 - 4.07 (m, 1 H), 3.39 (s, 3 H), 3.37 (s, 3 H), 3.08 - 3.06 (m, 2 H), 2.68 - 2.58 (m, 4 H) ; <sup>13</sup>C NMR (100 MHz, CDCl<sub>3</sub>):  $\delta$  148.1, 148.0, 147.1, 147.0, 130.4, 130.2, 129.8 (2xC), 108.3, 108.0, 105.1 (2xCH), 101.3 (2xCH<sub>2</sub>), 80.7, 80.5, 76.4, 75.9, 70.2, 69.8, 55.9, 55.7, 50.6, 50.4, 49.7, 49.5; HRMS calcd for C<sub>13</sub>H<sub>12</sub>O<sub>4</sub>: 232.0736; found: 232.0733.

Spectral data for 5-(1-methoxybut-2-ynyl)-6-(oxiran-2-yl)benzo[*d*][1,3]dioxole(**5o**).

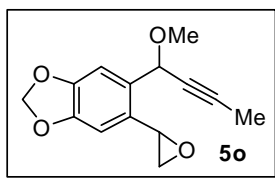

Yellow liquid ; IR (neat,  $\text{cm}^{-1}$ ): 3071 (s), 2112 (s), 1600 (s), 1466 (s), 1251 (s), 1151 (s), 1079 (s), 889 (s), 819 (s);  $^1\text{H}$  NMR (400 MHz,  $\text{CDCl}_3$ ): (1:1) Mixture of isomers:  $\delta$  7.07 (s, 1 H), 7.06 (s, 1 H), 6.72 (s, 1 H), 6.70 (s, 1 H), 5.90 - 5.89 (m, 4 H), 5.18 - 5.15 (m, 2 H), 4.18 - 4.17 (m, 1 H), 4.10 - 4.08 (m, 1 H), 3.34 (s, 3 H), 3.33 (s, 3 H), 3.08 - 3.06 (m, 2 H), 2.62 - 2.57 (m, 2 H), 1.88 - 1.21 (m, 6 H) ;  $^{13}\text{C}$  NMR (100 MHz,  $\text{CDCl}_3$ ):  $\delta$  147.8, 147.7, 146.9 (2xC), 130.9 (2xC), 130.1, 130.0, 108.2, 107.9, 104.9, 104.8, 101.1 (2x $\text{CH}_2$ ), 84.5, 84.0, 76.3, 76.2, 70.4, 70.3, 55.6, 55.4, 50.6, 50.4, 49.6, 49.5, 3.5 (2x $\text{CH}_3$ ); HRMS calcd for  $\text{C}_{14}\text{H}_{14}\text{O}_4$ : 246.0892; found: 246.0890.

Spectral data for 5-(1-methoxyhex-2-ynyl)-6-(oxiran-2-yl)benzo[*d*][1,3]dioxole(**5p**).

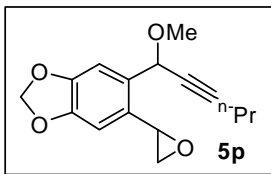

Yellow liquid ; IR (neat,  $\text{cm}^{-1}$ ): 3066 (s), 2110 (s), 1584 (s), 1475 (s), 1256 (s), 1155 (s), 1076 (s), 880 (s), 817 (s);  $^1\text{H}$  NMR (400 MHz,  $\text{CDCl}_3$ ): (1:1) Mixture of isomers:  $\delta$  7.07 (s, 1 H), 7.05 (s, 1 H), 6.71 (s, 1 H), 6.70 (s, 1 H), 5.90 - 5.88 (m, 4 H), 5.21 - 5.19 (m, 2 H), 4.18 - 4.17 (m, 1 H), 4.10 - 4.09 (m, 1 H), 3.35 (s, 3 H), 3.33 (s, 3 H), 3.07 ( $d_{a,b}$ ,  $J = 5.6$  Hz, 1 H), 3.06 ( $d_{a,b}$ ,  $J = 5.6$  Hz, 1 H), 2.61 ( $dd_{a,b}$ ,  $J = 2.6, 5.6$  Hz, 1 H), 2.57 ( $dd_{a,b}$ ,  $J = 2.6, 5.6$  Hz, 1 H), 2.24 - 2.18 (m, 4 H), 1.57 - 1.47 (m, 4 H), 0.97 - 0.93 (m, 6 H) ;  $^{13}\text{C}$  NMR (100 MHz,  $\text{CDCl}_3$ ):  $\delta$  147.8, 147.7, 146.8 (2xC), 131.0 (2xC), 130.2, 130.1, 108.3, 108.0, 104.9, 104.8, 101.1 (2x $\text{CH}_2$ ), 89.0, 88.5, 76.6 (2xC), 70.5, 70.3, 55.5, 55.3, 50.6, 50.4, 49.6, 49.4, 22.0, 21.9, 20.6 (2x $\text{CH}_2$ ), 13.4 (2x $\text{CH}_3$ ); HRMS calcd for  $\text{C}_{16}\text{H}_{18}\text{O}_4$ : 274.1205; found: 274.1202.

Spectral data for compound(**d<sub>1</sub>-5o**).

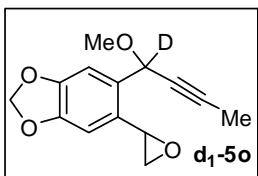

Yellow liquid ; IR (neat,  $\text{cm}^{-1}$ ): 3071 (s), 2111 (s), 1605 (s), 1466 (s), 1251 (s), 1151 (s), 1079 (s), 889 (s), 819 (s);  $^1\text{H}$  NMR (400 MHz,  $\text{CDCl}_3$ ): (1:1) Mixture of isomers:  $\delta$  7.09 (s, 1 H), 7.05 (s, 1 H), 6.74 (s, 1 H), 6.72 (s, 1 H), 5.93 - 5.91 (m, 4 H), 4.20 - 4.19 (m, 1 H), 4.12 - 4.10 (m, 1 H), 3.36 (s, 3 H), 3.35 (s, 3 H), 3.10 ( $d_{a,b}$ ,  $J = 5.6$  Hz, 1 H), 3.09 ( $d_{a,b}$ ,  $J = 5.6$  Hz, 1 H), 2.65 - 2.59 (m, 2 H), 1.90 (s, 3 H), 1.88 (s, 3 H);  $^{13}\text{C}$  NMR (100 MHz,  $\text{CDCl}_3$ ):  $\delta$  147.5, 147.4, 146.6 (2xC), 130.6 (2xC), 129.9, 129.8, 107.9, 107.6, 104.5 (2xCH), 100.9 (2xCH<sub>2</sub>), 84.1, 83.6, 76.1, 75.9, 70.0 - 69.4 (m, 2 CD), 55.2, 55.0, 50.2, 50.0, 49.3, 49.1, 3.1 (2xCH<sub>3</sub>); HRMS calcd for  $\text{C}_{14}\text{H}_{13}\text{DO}_4$ : 247.0955; found: 247.0950.

Spectral data for compound(**d<sub>2</sub>-5o**).

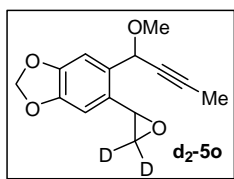

Yellow liquid ; IR (neat,  $\text{cm}^{-1}$ ): 3076 (s), 2112 (s), 1600 (s), 1460 (s), 1252 (s), 1157 (s), 1072 (s), 892 (s), 819 (s);  $^1\text{H}$  NMR (400 MHz,  $\text{CDCl}_3$ ): (1:1) Mixture of isomers:  $\delta$  7.08 (s, 1 H), 7.04 (s, 1 H), 6.73 (s, 1 H), 6.71 (s, 1 H), 5.91 - 5.90 (m, 4 H), 5.18 - 5.16 (m, 2 H), 4.18 (s, 1 H), 4.09 (s, 1 H), 3.35 (s, 3 H), 3.34 (s, 3 H), 1.89 (d,  $J = 2.2$  Hz, 3 H), 1.87 (d,  $J = 2.2$  Hz, 3 H);  $^{13}\text{C}$  NMR (100 MHz,  $\text{CDCl}_3$ ):  $\delta$  147.8 (2xC), 146.9 (2xC), 130.9 (2xC), 130.1 (2xC), 108.3, 108.0, 105.0, 104.9, 101.2 (2xCH<sub>2</sub>), 84.5, 84.0, 76.3, 76.2, 70.5, 70.4, 55.7, 55.5, 49.5, 49.4, 3.6 (2xCH<sub>3</sub>); HRMS calcd for  $\text{C}_{14}\text{H}_{12}\text{D}_2\text{O}_4$ : 248.1018; found: 248.0999.

Spectral data for 2-(2-(1-methoxybut-2-ynyl)phenyl)propanal(**8**).

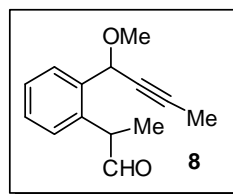

Yellow liquid ; IR (neat,  $\text{cm}^{-1}$ ): 3035 (s), 2821 (s), 2717 (s), 2112 (s), 1702 (s), 1600 (s), 1466 (s), 1151 (s), 1079 (s);  $^1\text{H}$  NMR (400 MHz,  $\text{CDCl}_3$ ): (1:1) Mixture of isomers:  $\delta$  9.67 (s, 1 H), 9.65 (s, 1 H), 7.35 - 7.20 (m, 8 H), 5.14 (d,  $J = 2.3$  Hz, 1 H), 5.09 (d,  $J = 2.2$  Hz, 1 H), 4.35 (q,  $J = 7.0$  Hz, 1 H), 4.27 (q,  $J = 7.0$  Hz, 1 H), 3.38 (s, 3 H), 3.37 (s, 3 H), 1.89 (d,  $J = 2.1$  Hz, 3 H), 1.88 (d,  $J = 2.3$  Hz, 3 H), 1.42 (d,  $J = 7.0$  Hz, 3 H), 1.40 (d,  $J =$



7.0 Hz, 3 H) ;  $^{13}\text{C}$  NMR (100 MHz,  $\text{CDCl}_3$ ):  $\delta$  201.3, 201.2, 137.6, 137.3, 137.2, 136.9, 129.1 (2xCH), 129.0, 128.9, 128.6, 128.3 (2xCH), 127.9, 127.4, 127.3, 85.2, 84.7, 72.5, 72.0, 56.0, 55.7, 48.4, 47.9, 15.1, 14.8, 3.6 (2x $\text{CH}_3$ );  $\text{C}_{14}\text{H}_{16}\text{O}_2$ : 216.1150; found: 216.1153.

Spectral data for compound(2).

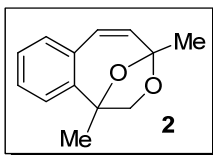

Colourless liquid ; IR (neat,  $\text{cm}^{-1}$ ): 3070 (s), 2805 (s), 1582 (s), 1472 (s), 1021 (s);  $^1\text{H}$  NMR (400 MHz,  $\text{CDCl}_3$ ) :  $\delta$  7.30 - 7.21 (m, 4 H), 6.50 (d,  $J = 11.8$  Hz, 1 H), 5.79 (d,  $J = 11.8$  Hz, 1 H), 3.94 ( $d_{a,b}$ ,  $J = 8.2$  Hz, 1 H), 3.81 ( $d_{a,b}$ ,  $J = 8.2$  Hz, 1 H), 1.79 (s, 3 H), 1.65 (s, 3 H);  $^{13}\text{C}$  NMR (100 MHz,  $\text{CDCl}_3$ ) :  $\delta$  144.4, 134.0, 133.0, 131.8, 131.3, 127.7, 127.6, 124.7, 107.8, 80.9, 76.5, 25.3, 23.0; HRMS calcd for  $\text{C}_{13}\text{H}_{14}\text{O}_2$ : 202.0994, found: 202.0996.

Spectral data for 1-(4-methylnaphthalen-2-yl)ethanone(3):

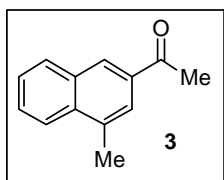

Colourless liquid ; IR (neat,  $\text{cm}^{-1}$ ): 3070 (s), 2808 (s), 1752 (s), 1590 (s), 1472 (s);  $^1\text{H}$  NMR (600 MHz,  $\text{CDCl}_3$ ) :  $\delta$  8.31 (s, 1 H), 7.98 (dd,  $J = 8.4, 30.2$  Hz, 1 H), 7.94 (dd,  $J = 6.8, 7.5$  Hz, 1 H), 7.86 (s, 1H), 7.62 (t,  $J = 8.3$  Hz, 1 H), 7.54 (t,  $J = 6.9$  Hz, 1 H), 2.70 (s, 6 H);  $^{13}\text{C}$  NMR (150 MHz,  $\text{CDCl}_3$ ) :  $\delta$  198.4, 134.9, 134.0, 133.5, 132.6, 130.2, 128.8, 128.3, 126.4, 124.1 (2xCH), 26.6, 19.4; HRMS calcd for  $\text{C}_{13}\text{H}_{12}\text{O}_2$ : 184.0888, found: 184.0891.

Spectral data for 3,4-dimethyl-2-naphthaldehyde(4).

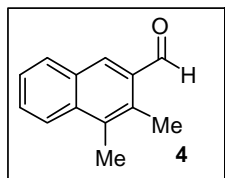

Colourless liquid ; IR (neat,  $\text{cm}^{-1}$ ): 3078 (s), 2833 (s), 2809 (s), 2705 (s), 1730 (s), 1585 (s), 1452 (s);  $^1\text{H}$  NMR (600 MHz,  $\text{CDCl}_3$ ) :  $\delta$  10.33 (s, 1 H), 8.16 (s, 1 H), 8.06 (d,  $J = 8.5$  Hz, 1 H), 7.93 (d,  $J = 8.1$  Hz, 1 H), 7.63 (t,  $J = 7.5$  Hz, 1 H), 7.49 (t,  $J = 7.5$  Hz, 1 H), 2.76 (s, 3 H), 2.63 (s, 3 H);  $^{13}\text{C}$  NMR (150 MHz,  $\text{CDCl}_3$ ) :  $\delta$  193.8, 135.1, 134.9, 133.5, 133.0, 132.5, 130.9, 130.0, 129.0, 125.6, 124.0, 15.5, 14.5; HRMS calcd for  $\text{C}_{13}\text{H}_{12}\text{O}$ : 184.0888, found: 184.0889.

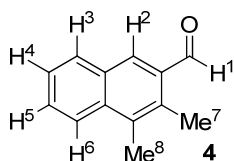

| irradiation                      | intensity increase                                                                |
|----------------------------------|-----------------------------------------------------------------------------------|
| H <sup>1</sup> ( $\delta$ 10.33) | H <sup>2</sup> ( $\delta$ 8.16, 7.88%), Me <sup>7</sup> ( $\delta$ 2.76, 1.52%),  |
| H <sup>2</sup> ( $\delta$ 8.16)  | H <sup>1</sup> ( $\delta$ 10.33, 9.58%), H <sup>3</sup> ( $\delta$ 7.93, 3.62%),  |
| H <sup>6</sup> ( $\delta$ 8.06)  | Me <sup>8</sup> ( $\delta$ 2.63, 9.59%), H <sup>5</sup> ( $\delta$ 7.63, 5.98%),  |
| Me <sup>7</sup> ( $\delta$ 2.76) | H <sup>1</sup> ( $\delta$ 10.33, 1.35%), Me <sup>8</sup> ( $\delta$ 2.63, 0.06%), |
| Me <sup>8</sup> ( $\delta$ 2.63) | H <sup>6</sup> ( $\delta$ 8.06, 3.07%), Me <sup>7</sup> ( $\delta$ 2.76, 0.75%).  |

Spectral data for 4-methyl-3-phenyl-2-naphthaldehyde(**6a**).

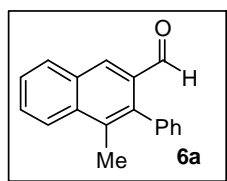

Yellow liquid ; IR (neat,  $\text{cm}^{-1}$ ): 3079 (s), 3031 (s), 2831 (s), 2807 (s), 2707 (s), 1736 (s), 1580 (s), 1450 (s);  $^1\text{H}$  NMR (400 MHz,  $\text{CDCl}_3$ ) :  $\delta$  9.76 (s, 1 H), 8.41 (s, 1 H), 8.09 (d,  $J = 8.5$  Hz, 1 H), 8.02 (d,  $J = 8.0$  Hz, 1 H), 7.68 (t,  $J = 7.1$  Hz, 1 H), 7.57 (t,  $J = 7.1$  Hz, 1 H), 7.50 - 7.43 (m, 5 H), 2.45 (s, 3 H);  $^{13}\text{C}$  NMR (100 MHz,  $\text{CDCl}_3$ ) :  $\delta$  193.0, 139.4, 137.8, 135.2, 133.1, 132.2, 131.7, 130.7, 130.3 (2xCH), 129.0, 128.3 (2xCH), 127.6, 127.4, 126.5, 124.6, 15.9; HRMS calcd for  $\text{C}_{18}\text{H}_{14}\text{O}$ : 246.1045, found: 246.1048.

Spectral data for 4-methyl-3-propyl-2-naphthaldehyde(**6b**).

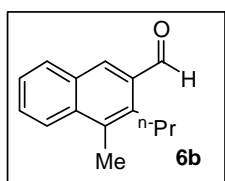

Colourless liquid ; IR (neat,  $\text{cm}^{-1}$ ): 3064 (s), 2830 (s), 2809 (s), 2705 (s), 1737 (s), 1585 (s), 1454 (s);  $^1\text{H}$  NMR (400 MHz,  $\text{CDCl}_3$ ) :  $\delta$  10.32 (s, 1 H), 8.18 (s, 1 H), 8.04 (d,  $J =$

8.6 Hz, 1 H), 7.91 (d,  $J = 7.8$  Hz, 1 H), 7.62 (t,  $J = 7.1$  Hz, 1 H), 7.49 (t,  $J = 7.1$  Hz, 1 H), 3.20 (t,  $J = 2.6$  Hz, 2 H), 2.65 (s, 3 H), 1.65 - 1.56 (m, 2 H), 1.06 (t,  $J = 7.3$  Hz, 3 H);  $^{13}\text{C}$  NMR (100 MHz,  $\text{CDCl}_3$ ) :  $\delta$  193.3, 137.3, 135.3, 134.6, 132.9, 132.5, 130.9, 130.0, 128.9, 125.6, 124.1, 30.5, 24.6, 14.3, 14.0; HRMS calcd for  $\text{C}_{15}\text{H}_{16}\text{O}$ : 212.1201, found: 212.1205.

Spectral data for 4-methyl-2-naphthaldehyde(**6c**).

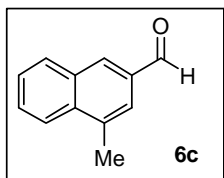

Colourless liquid ; IR (neat,  $\text{cm}^{-1}$ ): 3055 (s), 2833 (s), 2809 (s), 2709 (s), 1740 (s), 1587 (s), 1455 (s);  $^1\text{H}$  NMR (400 MHz,  $\text{CDCl}_3$ ) :  $\delta$  10.10 (s, 1 H), 8.18 (s, 1 H), 8.03 (d,  $J = 8.4$  Hz, 1 H), 7.99 (d,  $J = 7.7$  Hz, 1 H), 7.78 (s, 1 H), 7.67 (t,  $J = 7.3$  Hz, 1 H), 7.58 (t,  $J = 7.6$  Hz, 1 H), 2.72 (s, 3 H);  $^{13}\text{C}$  NMR (100 MHz,  $\text{CDCl}_3$ ) :  $\delta$  192.5, 135.9, 135.8, 133.6, 133.4, 132.7, 130.2, 129.0, 126.7, 124.4, 122.8, 19.4; HRMS calcd for  $\text{C}_{12}\text{H}_{10}\text{O}$ : 170.0732, found: 170.0735.

Spectral data for 4-butyl-2-naphthaldehyde(**6d**).

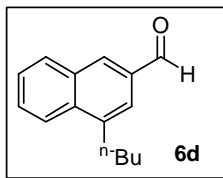

Colourless liquid ; IR (neat,  $\text{cm}^{-1}$ ): 3055 (s), 2841 (s), 2808 (s), 2710 (s), 1737 (s), 1590 (s), 1451 (s);  $^1\text{H}$  NMR (600 MHz,  $\text{CDCl}_3$ ) :  $\delta$  10.11 (s, 1 H), 8.17 (s, 1 H), 8.08 (d,  $J = 8.5$  Hz, 1 H), 7.99 (d,  $J = 7.9$  Hz, 1 H), 7.78 (s, 1 H), 7.65 (t,  $J = 7.5$  Hz, 1 H), 7.55 (t,  $J = 7.2$  Hz, 1 H), 3.09 (t,  $J = 7.8$  Hz, 2 H), 1.75 - 1.71 (m, 2 H), 1.47 - 1.43 (m, 2 H), 0.96 (t,  $J = 7.3$  Hz, 3 H);  $^{13}\text{C}$  NMR (150 MHz,  $\text{CDCl}_3$ ) :  $\delta$  192.5, 140.5, 135.2, 133.7, 133.3, 133.1, 130.4, 128.9, 126.5, 124.2, 122.1, 32.7, 32.6, 22.8, 13.9; HRMS calcd for  $\text{C}_{15}\text{H}_{16}\text{O}$ : 212.1201, found: 212.1203.

Spectral data for 3-methyl-4-phenyl-2-naphthaldehyde(**6e**).

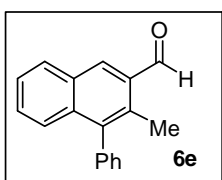

Yellow liquid ; IR (neat,  $\text{cm}^{-1}$ ): 3088 (s), 3033 (s), 2831 (s), 2809 (s), 2708 (s), 1736 (s), 1593 (s), 1456 (s);  $^1\text{H}$  NMR (400 MHz,  $\text{CDCl}_3$ ) :  $\delta$  10.40 (s, 1 H), 8.35 (s, 1 H), 7.97 (d,  $J = 7.3$  Hz, 1 H), 7.52 - 7.43 (m, 5 H), 7.34 (d,  $J = 7.9$  Hz, 1 H), 7.23 - 7.21 (m, 2 H), 2.48 (s, 3 H);  $^{13}\text{C}$  NMR (100 MHz,  $\text{CDCl}_3$ ) :  $\delta$  193.4, 140.3, 138.9, 135.6, 135.4, 132.9, 132.7, 130.9, 130.1 (2xCH), 129.3, 129.0, 128.5 (2xCH), 127.4, 126.6, 125.9, 17.1; HRMS calcd for  $\text{C}_{18}\text{H}_{14}\text{O}$ : 246.1045, found: 246.1046.

Spectral data for 4-butyl-3-methyl-2-naphthaldehyde(**6f**).

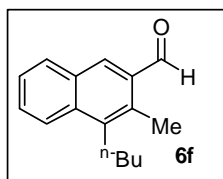

Colourless liquid ; IR (neat,  $\text{cm}^{-1}$ ): 3052 (s), 2843 (s), 2804 (s), 2710 (s), 1734 (s), 1590 (s), 1451 (s);  $^1\text{H}$  NMR (400 MHz,  $\text{CDCl}_3$ ) :  $\delta$  10.32 (s, 1 H), 8.14 (s, 1 H), 8.03 (d,  $J = 8.6$  Hz, 1 H), 7.92 (d,  $J = 8.0$  Hz, 1 H), 7.62 (t,  $J = 7.2$  Hz, 1 H), 7.48 (t,  $J = 7.4$  Hz, 1 H), 3.09 (t,  $J = 7.1$  Hz, 2 H), 2.75 (s, 3 H), 1.60 - 1.51 (m, 4 H), 0.99 (t,  $J = 7.0$  Hz, 3 H);  $^{13}\text{C}$  NMR (100 MHz,  $\text{CDCl}_3$ ) :  $\delta$  193.8, 138.3, 135.0, 134.5, 133.1, 132.1, 131.2, 130.1, 129.0, 125.5, 124.0, 32.1, 28.0, 23.2, 15.1, 13.9; HRMS calcd for  $\text{C}_{16}\text{H}_{18}\text{O}$ : 226.1358, found: 226.1359.

Spectral data for 1-(3,4-dimethylnaphthalen-2-yl)ethanone(**6g**).

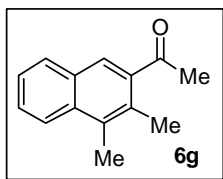

Colourless liquid ; IR (neat,  $\text{cm}^{-1}$ ): 3071 (s), 2805 (s), 1742 (s), 1595 (s), 1472 (s);  $^1\text{H}$  NMR (400 MHz,  $\text{CDCl}_3$ ) :  $\delta$  8.02 (d,  $J = 8.6$  Hz, 1 H), 7.89 (s, 1 H), 7.82 (d,  $J = 8.2$  Hz, 1 H), 7.55 (dt,  $J = 1.2, 7.6$  Hz, 1 H), 7.45 (dt,  $J = 0.76, 7.8$  Hz, 1 H), 2.66 (s, 3 H), 2.61 (s, 3 H), 2.51 (s, 3 H);  $^{13}\text{C}$  NMR (100 MHz,  $\text{CDCl}_3$ ) :  $\delta$  203.8, 138.9, 133.7, 133.4, 130.7, 130.5, 129.1, 127.6, 126.5, 125.4, 123.8, 30.4, 17.4, 14.7; HRMS calcd for  $\text{C}_{14}\text{H}_{14}\text{O}$ : 198.1045, found: 198.1043.

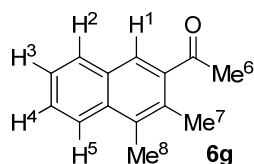

| irradiation | intensity increase |
|-------------|--------------------|
|-------------|--------------------|

|                          |                                  |
|--------------------------|----------------------------------|
| H <sup>2</sup> (δ 7.82)  | H <sup>1</sup> (δ 7.89, 1.04%),  |
| H <sup>1</sup> (δ 7.89)  | Me <sup>6</sup> (δ 2.66, 4.28%), |
| H <sup>5</sup> (δ 8.02)  | Me <sup>8</sup> (δ 2.61, 2.24%), |
| Me <sup>8</sup> (δ 2.61) | H <sup>5</sup> (δ 8.02, 3.50%),  |
| Me <sup>6</sup> (δ 2.66) | H <sup>1</sup> (δ 7.89, 1.76%).  |

Spectral data for 1-(3,4-dimethylnaphthalen-2-yl)propan-1-one(**6h**).

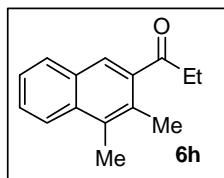

Colourless liquid ; IR (neat, cm<sup>-1</sup>): 3076 (s), 2803 (s), 1745 (s), 1599 (s), 1474 (s); <sup>1</sup>H NMR (400 MHz, CDCl<sub>3</sub>) : δ 8.01 (d, *J* = 8.4 Hz, 1 H), 7.79 (d, *J* = 8.9 Hz, 1 H), 7.78 (s, 1 H), 7.54 (t, *J* = 8.0 Hz, 1 H), 7.44 (t, *J* = 7.6 Hz, 1 H), 2.97 (q, *J* = 7.1 Hz, 2 H), 2.59 (s, 3 H), 2.46 (s, 3 H), 1.25 (t, *J* = 7.4 Hz, 3 H); <sup>13</sup>C NMR (100 MHz, CDCl<sub>3</sub>) : δ 207.3, 139.3, 133.3, 133.1, 130.7, 130.0, 128.9, 127.2, 125.2, 125.1, 123.7, 35.9, 17.2, 14.6, 8.3; HRMS calcd for C<sub>15</sub>H<sub>16</sub>O: 212.1201, found: 212.1203.

| irradiation | intensity increase |
|-------------|--------------------|
|-------------|--------------------|

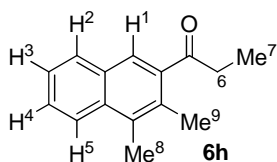

|                                       |                                                                   |
|---------------------------------------|-------------------------------------------------------------------|
| H <sup>1</sup> (δ 7.78)               | CH <sub>2</sub> <sup>6</sup> (δ 2.97, 3.47%),                     |
| H <sup>5</sup> (δ 8.01)               | Me <sup>8</sup> (δ 2.59, 8.73%), H <sup>4</sup> (δ 7.54, 4.42%),  |
| CH <sub>2</sub> <sup>6</sup> (δ 2.97) | H <sup>1</sup> (δ 7.78, 2.99 %), Me <sup>7</sup> (δ 1.25, 2.64%), |
| Me <sup>8</sup> (δ 2.59)              | H <sup>5</sup> (δ 8.01, 3.59%).                                   |

Spectral data for 1-(3,4-dimethylnaphthalen-2-yl)propan-1-ol(**6h-OH**).

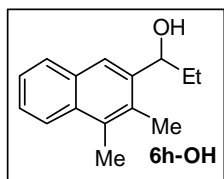

White Solid ; IR (neat, cm<sup>-1</sup>): 3555 (br), 3072 (s), 2808 (s), 1592 (s), 1477 (s); <sup>1</sup>H NMR (400 MHz, CDCl<sub>3</sub>) : δ 8.00 (d, *J* = 8.4 Hz, 1 H), 7.82 (s, 1 H), 7.79 (d, *J* = 7.9 Hz, 1 H), 7.47 - 7.38 (m, 2 H), 5.03 (dd, *J* = 4.5, 3.3 Hz, 1 H), 2.61 (s, 3 H), 2.42 (s, 3 H), 1.91 -

1.73 (m, 2 H), 1.03 (t,  $J = 7.4$  Hz, 3 H);  $^{13}\text{C}$  NMR (100 MHz,  $\text{CDCl}_3$ ) :  $\delta$  141.2, 131.9, 131.8 (2xC), 130.8, 128.4, 125.5, 124.6, 123.6, 122.3, 72.9, 30.9, 15.5, 14.8, 10.4; HRMS calcd for  $\text{C}_{15}\text{H}_{18}\text{O}$ : 214.1358, found: 214.1360.

Spectral data for 1-(4-methylnaphthalen-2-yl)propan-1-one(**6i**).

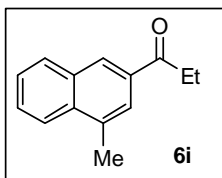

Colourless liquid ; IR (neat,  $\text{cm}^{-1}$ ): 3081 (s), 2803 (s), 1749 (s), 1598 (s), 1471 (s);  $^1\text{H}$  NMR (400 MHz,  $\text{CDCl}_3$ ) :  $\delta$  8.31 (s, 1 H), 7.99 (d,  $J = 8.4$  Hz, 1 H), 7.94 (d,  $J = 8.4$  Hz, 1 H), 7.86 (d,  $J = 0.5$  Hz, 1 H), 7.61 (dt,  $J = 1.4, 7.6$  Hz, 1 H), 7.53 (dt,  $J = 1.2, 7.5$  Hz, 1 H), 3.11 (q,  $J = 7.2$  Hz, 2 H), 2.71 (s, 3 H), 1.26 (t,  $J = 7.1$  Hz, 3 H);  $^{13}\text{C}$  NMR (100 MHz,  $\text{CDCl}_3$ ) :  $\delta$  201.0, 135.0, 134.8, 133.8, 132.7, 130.1, 128.2, 128.1, 126.3, 124.2, 124.1, 31.7, 19.4, 8.4; HRMS calcd for  $\text{C}_{14}\text{H}_{14}\text{O}$ : 198.1045, found: 198.1047.

| irradiation                      | intensity increase                                                              |
|----------------------------------|---------------------------------------------------------------------------------|
| $\text{H}^1$ ( $\delta$ 8.31)    | $\text{H}^2$ ( $\delta$ 7.94, 2.31%), $\text{CH}_2^7$ ( $\delta$ 3.11, 4.16%),  |
| $\text{H}^6$ ( $\delta$ 7.86)    | $\text{CH}_2^7$ ( $\delta$ 3.11, 1.37%), $\text{Me}^9$ ( $\delta$ 2.71, 3.18%), |
| $\text{CH}_2^7$ ( $\delta$ 3.11) | $\text{Me}^9$ ( $\delta$ 2.71, 4.80%), $\text{Me}^8$ ( $\delta$ 1.26, 3.98%),   |
|                                  | $\text{H}^1$ ( $\delta$ 8.31, 2.23%), $\text{H}^6$ ( $\delta$ 7.86, 1.15%),     |
| $\text{Me}^8$ ( $\delta$ 1.26)   | $\text{CH}_2^7$ ( $\delta$ 3.11, 1.22%),                                        |
| $\text{Me}^9$ ( $\delta$ 2.71)   | $\text{H}^5$ ( $\delta$ 7.99, 1.67%), $\text{H}^6$ ( $\delta$ 7.86, 1.14%).     |

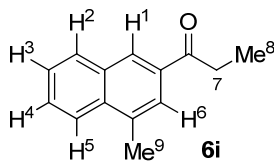

Spectral data for 7-fluoro-3,4-dimethyl-2-naphthaldehyde(**6j**).

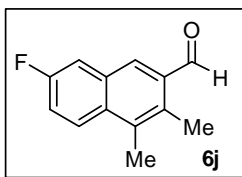

Colourless liquid ; IR (neat,  $\text{cm}^{-1}$ ): 3052 (s), 2843 (s), 2809 (s), 2710 (s), 1733 (s), 1597 (s), 1451 (s), 1115 (s);  $^1\text{H}$  NMR (600 MHz,  $\text{CDCl}_3$ ) :  $\delta$  10.33 (s, 1 H), 8.09 (s, 1 H), 8.06 (dd,  $J = 5.3, 6.2$  Hz, 1 H), 7.53 (dd,  $J = 2.7, 9.1$  Hz, 1 H), 7.39 (dt,  $J = 1.7, 8.0$  Hz, 1 H), 2.74 (s, 3 H), 2.63 (s, 3 H);  $^{13}\text{C}$  NMR (150 MHz,  $\text{CDCl}_3$ ) :  $\delta$  193.6, 160.2 (d,  $J_{CF} = 246.0$  Hz), 133.9, 133.8, 133.5, 133.4, 132.1, 131.8 (d,  $J_{CF} = 14.7$  Hz), 126.7 (d,  $J_{CF} = 8.5$  Hz),

119.0 (d,  $J_{CF} = 24.7$  Hz), 112.6 (d,  $J_{CF} = 19.9$  Hz), 15.4, 14.7; HRMS calcd for  $C_{13}H_{11}FO$ : 202.0794, found: 202.0796.

Spectral data for 6-fluoro-3,4-dimethyl-2-naphthaldehyde(**6k**).

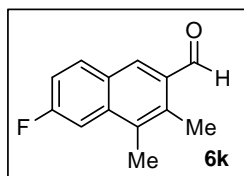

Colourless liquid ; IR (neat,  $cm^{-1}$ ): 3055 (s), 2844 (s), 2809 (s), 2712 (s), 1739 (s), 1598 (s), 1455 (s), 1118 (s);  $^1H$  NMR (400 MHz,  $CDCl_3$ ) :  $\delta$  10.29 (s, 1 H), 8.12 (s, 1 H), 7.91 (dd,  $J = 6.0, 9.0$  Hz, 1 H), 7.62 (dd,  $J = 2.3, 11.5$  Hz, 1 H), 7.25 (dt,  $J = 2.2, 8.5$  Hz, 1 H), 2.74 (s, 3 H), 2.55 (s, 3 H);  $^{13}C$  NMR (100 MHz,  $CDCl_3$ ) :  $\delta$  193.3, 162.8 (d,  $J_{CF} = 248.0$  Hz), 136.5 (d,  $J_{CF} = 10.0$  Hz), 134.4, 133.7 (2xC), 132.9, 132.6 (d,  $J_{CF} = 10$  Hz), 127.9, 116.0 (d,  $J_{CF} = 25.0$  Hz), 108.1 (d,  $J_{CF} = 22.0$  Hz), 15.6, 14.6; HRMS calcd for  $C_{13}H_{11}FO$ : 202.0794, found: 202.0797.

Spectral data for 6-methoxy-3,4-dimethyl-2-naphthaldehyde(**6l**).

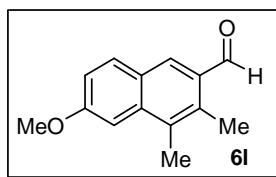

Colourless liquid ; IR (neat,  $cm^{-1}$ ): 3059 (s), 2844 (s), 2812 (s), 2707 (s), 1735 (s), 1590 (s), 1456 (s), 1218 (s);  $^1H$  NMR (400 MHz,  $CDCl_3$ ) :  $\delta$  10.24 (s, 1 H), 8.02 (s, 1 H), 7.80 (d,  $J = 8.9$  Hz, 1 H), 7.24 (s, 1 H), 7.14 (dd,  $J = 2.4, 8.9$  Hz, 1 H), 3.94 (s, 3 H), 2.74 (s, 3 H), 2.55 (s, 3 H);  $^{13}C$  NMR (100 MHz,  $CDCl_3$ ) :  $\delta$  193.4, 160.3, 136.8, 134.8, 133.2, 131.8, 131.6, 131.1, 126.2, 118.0, 102.9, 55.3, 15.6, 14.5; HRMS calcd for  $C_{14}H_{14}O_2$ : 214.0994, found: 214.0998.

| irradiation                                                                         | intensity increase                                                                                                                                                                                                                                                                                                                 |
|-------------------------------------------------------------------------------------|------------------------------------------------------------------------------------------------------------------------------------------------------------------------------------------------------------------------------------------------------------------------------------------------------------------------------------|
| 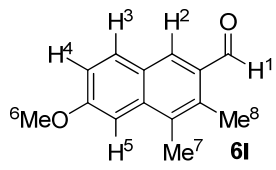 | $H^2$ ( $\delta$ 8.05) $H^1$ ( $\delta$ 10.24, 2.32%), $H^3$ ( $\delta$ 7.80, 1.51%),<br>$H^3$ ( $\delta$ 7.80) $H^2$ ( $\delta$ 8.05, 1.37%), $H^4$ ( $\delta$ 7.14, 4.05%),<br>$Me^7$ ( $\delta$ 2.55) $H^5$ ( $\delta$ 7.24, 0.93%), $Me^8$ ( $\delta$ 2.74, 0.90%),<br>$Me^8$ ( $\delta$ 2.74) $H^1$ ( $\delta$ 10.24, 0.33%). |

Spectral data for 7,8-dimethylnaphtho[2,3-*d*][1,3]dioxole-6-carbaldehyde(**6m**).

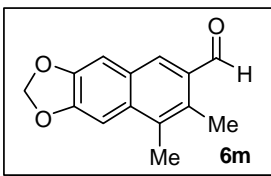

Colourless liquid ; IR (neat,  $\text{cm}^{-1}$ ): 3058 (s), 2846 (s), 2811 (s), 2710 (s), 1739 (s), 1597 (s), 1459 (s), 1222 (s);  $^1\text{H}$  NMR (400 MHz,  $\text{CDCl}_3$ ) :  $\delta$  10.23 (s, 1 H), 7.90 (s, 1 H), 7.27 (s, 1 H), 7.11 (s, 1 H), 6.04 (s, 2 H), 2.68 (s, 3 H), 2.47 (s, 3 H);  $^{13}\text{C}$  NMR (100 MHz,  $\text{CDCl}_3$ ) :  $\delta$  193.4, 150.4, 147.1, 133.1, 132.9, 132.4, 131.6, 131.5, 127.8, 105.2, 101.4, 100.8, 15.2, 14.8; HRMS calcd for  $\text{C}_{14}\text{H}_{12}\text{O}_3$ : 228.0786, found: 228.0789.

Spectral data for naphtho[2,3-*d*][1,3]dioxole-6-carbaldehyde(**6n**).

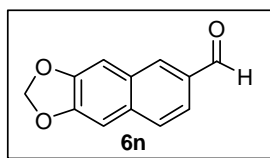

Colourless liquid ; IR (neat,  $\text{cm}^{-1}$ ): 3066 (s), 2846 (s), 2711 (s), 1731 (s), 1592 (s), 1457 (s), 1225 (s);  $^1\text{H}$  NMR (400 MHz,  $\text{CDCl}_3$ ) :  $\delta$  10.05 (s, 1 H), 8.12 (d,  $J = 0.6$  Hz, 1 H), 7.78 (dd,  $J = 1.6, 8.5$  Hz, 1 H), 7.72 (d,  $J = 8.3$  Hz, 1 H), 7.23 (s, 1 H), 7.15 (s, 1 H), 6.08 (s, 2 H);  $^{13}\text{C}$  NMR (100 MHz,  $\text{CDCl}_3$ ) :  $\delta$  192.1, 150.2, 148.5, 134.5, 132.9, 132.5, 129.8, 127.9, 122.2, 105.1, 104.1, 101.6; HRMS calcd for  $\text{C}_{12}\text{H}_8\text{O}_3$ : 200.0473, found: 232.0479.

Spectral data for 7-methylnaphtho[2,3-*d*][1,3]dioxole-6-carbaldehyde(**6o**).

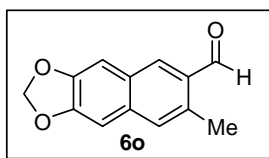

Colourless liquid ; IR (neat,  $\text{cm}^{-1}$ ): 3049 (s), 2846 (s), 2811 (s), 2714 (s), 1732 (s), 1599 (s), 1451 (s), 1224 (s);  $^1\text{H}$  NMR (400 MHz,  $\text{CDCl}_3$ ) :  $\delta$  10.23 (s, 1 H), 8.07 (s, 1 H), 7.44 (s, 1 H), 7.17 (s, 1 H), 7.04 (s, 1 H), 6.05 (s, 2 H), 2.71 (s, 3 H);  $^{13}\text{C}$  NMR (100 MHz,  $\text{CDCl}_3$ ) :  $\delta$  192.9, 150.3, 147.8, 134.4, 134.1, 133.8, 131.5, 129.1, 128.0, 104.7, 103.2, 101.4, 20.0; HRMS calcd for  $\text{C}_{13}\text{H}_{10}\text{O}_3$ : 214.063, found: 214.066.



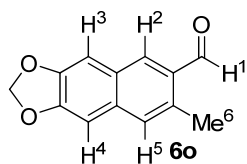

| irradiation              | intensity increase                                               |
|--------------------------|------------------------------------------------------------------|
| H <sup>1</sup> (δ 10.23) | H <sup>2</sup> (δ 8.07, 1.59%),                                  |
| H <sup>2</sup> (δ 8.07)  | H <sup>1</sup> (δ 10.23, 1.77%), H <sup>3</sup> (δ 7.17, 1.28%), |
| H <sup>5</sup> (δ 7.44)  | H <sup>4</sup> (δ 7.04, 1.98%), Me <sup>6</sup> (δ 2.71, 2.56%), |
| Me <sup>6</sup> (δ 2.71) | H <sup>1</sup> (δ 10.23, 0.23%), H <sup>5</sup> (δ 7.44, 0.48%). |

Spectral data for compound(**d<sub>1</sub>-6o**).

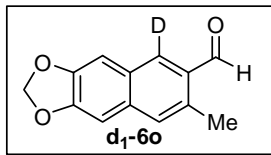

Yellow liquid ; IR (neat, cm<sup>-1</sup>): 3042 (s), 2849 (s), 2817 (s), 2711 (s), 1735 (s), 1596 (s), 1459 (s), 1220 (s); <sup>1</sup>H NMR (400 MHz, CDCl<sub>3</sub>) : δ 10.22 (s, 1 H), 7.42 (s, 1 H), 7.15 (s, 1 H), 7.03 (s, 1 H), 6.04 (s, 2 H), 2.70 (s, 3 H); <sup>13</sup>C NMR (100 MHz, CDCl<sub>3</sub>) : δ 192.81, 150.3, 147.8, 134.1 (2xC), 133.8, 131.4, 129.0, 128.0, 104.6, 103.2, 101.4, 19.9; HRMS calcd for C<sub>13</sub>H<sub>9</sub>DO<sub>3</sub>: 215.0693, found: 215.0695.

Spectral data for compound(**d<sub>2</sub>-6o**).

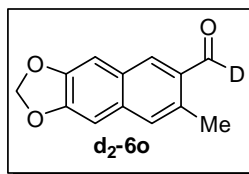

Yellow liquid ; IR (neat, cm<sup>-1</sup>): 3049 (s), 2847 (s), 2812 (s), 2717 (s), 1741 (s), 1599 (s), 1453 (s), 1222 (s); <sup>1</sup>H NMR (600 MHz, CDCl<sub>3</sub>) : δ 8.07 (s, 1 H), 7.44 (s, 1 H), 7.17 (s, 1 H), 7.04 (s, 1 H), 6.05 (s, 2 H), 2.71 (s, 3 H); <sup>13</sup>C NMR (150 MHz, CDCl<sub>3</sub>) : δ 192.7 (t, J<sub>C-D</sub> = 21 Hz), 150.3, 147.9, 134.3, 134.2, 133.9, 131.5, 129.1, 128.1, 104.7, 103.2, 101.4, 19.9; HRMS calcd for C<sub>13</sub>H<sub>9</sub>DO<sub>3</sub>: 215.0693, found: 215.0698.

Spectral data for 7-propylnaphtho[2,3-*d*][1,3]dioxole-6-carbaldehyde(**6p**).

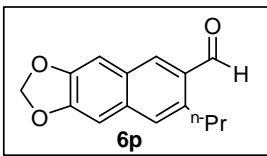

Colourless liquid ; IR (neat, cm<sup>-1</sup>): 3056 (s), 2848 (s), 2816 (s), 2714 (s), 1740 (s), 1599 (s), 1453 (s), 1222 (s); <sup>1</sup>H NMR (600 MHz, CDCl<sub>3</sub>) : δ 10.25 (s, 1 H), 8.11 (s, 1 H), 7.42

(s, 1 H), 7.17 (s, 1 H), 7.06 (s, 1 H), 6.05 (s, 2 H), 3.05 (t,  $J = 1.4$  Hz, 2 H), 1.68 - 1.64 (m, 2 H), 0.98 (t,  $J = 7.2$  Hz, 3 H);  $^{13}\text{C}$  NMR (150 MHz,  $\text{CDCl}_3$ ) :  $\delta$  192.4, 150.2, 147.9, 139.0, 133.9, 131.0, 128.4, 128.3, 128.2, 104.7, 103.3, 101.4, 34.7, 25.1, 13.9; HRMS calcd for  $\text{C}_{15}\text{H}_{14}\text{O}_3$ : 242.0943, found: 242.0945.

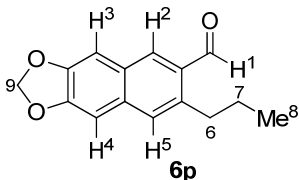

| irradiation                      | intensity increase                                                                                                                                              |
|----------------------------------|-----------------------------------------------------------------------------------------------------------------------------------------------------------------|
| $\text{H}^1$ ( $\delta$ 10.25)   | $\text{H}^2$ ( $\delta$ 8.11, 1.89%),                                                                                                                           |
| $\text{H}^2$ ( $\delta$ 8.11)    | $\text{H}^1$ ( $\delta$ 10.25, 2.45%), $\text{H}^3$ ( $\delta$ 7.17, 1.63%),                                                                                    |
| $\text{H}^3$ ( $\delta$ 7.17)    | $\text{H}^1$ ( $\delta$ 10.25, 1.68%), $\text{H}^2$ ( $\delta$ 8.11, 2.53%),<br>$\text{CH}_2^9$ ( $\delta$ 6.06, 2.61%),                                        |
| $\text{CH}_2^6$ ( $\delta$ 3.05) | $\text{H}^1$ ( $\delta$ 10.25, 0.67%), $\text{H}^5$ ( $\delta$ 7.45, 0.59%),<br>$\text{CH}_2^7$ ( $\delta$ 1.66, 1.63%), $\text{Me}^8$ ( $\delta$ 0.98, 0.67%). |

Spectral data for (*E*)-4-methoxy-1,3-dimethyl-1-(prop-1-enyl)-1*H*-isochromene(**7i**).

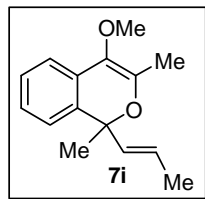

Colourless liquid ; IR (neat,  $\text{cm}^{-1}$ ): 3068 (s), 3020 (s), 2844 (s), 2819 (s), 1621(s), 1589 (s), 1452 (s), 1221 (s);  $^1\text{H}$  NMR (400 MHz,  $\text{CDCl}_3$ ) :  $\delta$  7.26 - 7.19 (m, 2 H), 7.13 (dt,  $J = 1.7, 7.5$  Hz, 1 H), 7.01 (dd,  $J = 0.7, 7.4$  Hz, 1 H), 5.65 - 5.60 (m, 1 H), 5.43 - 5.34 (m, 1 H), 3.60 (s, 3 H), 1.94 (s, 3 H), 1.66 (t,  $J = 1.6$  Hz, 3 H), 1.65 (s, 3 H);  $^{13}\text{C}$  NMR (150 MHz,  $\text{CDCl}_3$ ) :  $\delta$  142.6, 136.0, 134.4, 128.4 (2xC), 127.4, 126.1 (2xCH), 123.9, 118.5, 79.3, 60.4, 25.0, 17.6, 14.4; HRMS calcd for  $\text{C}_{15}\text{H}_{18}\text{O}_2$ : 230.1307, found: 230.1310.

(VI) NOE spectra for compound 4.

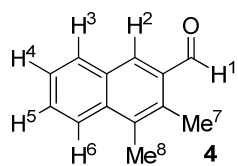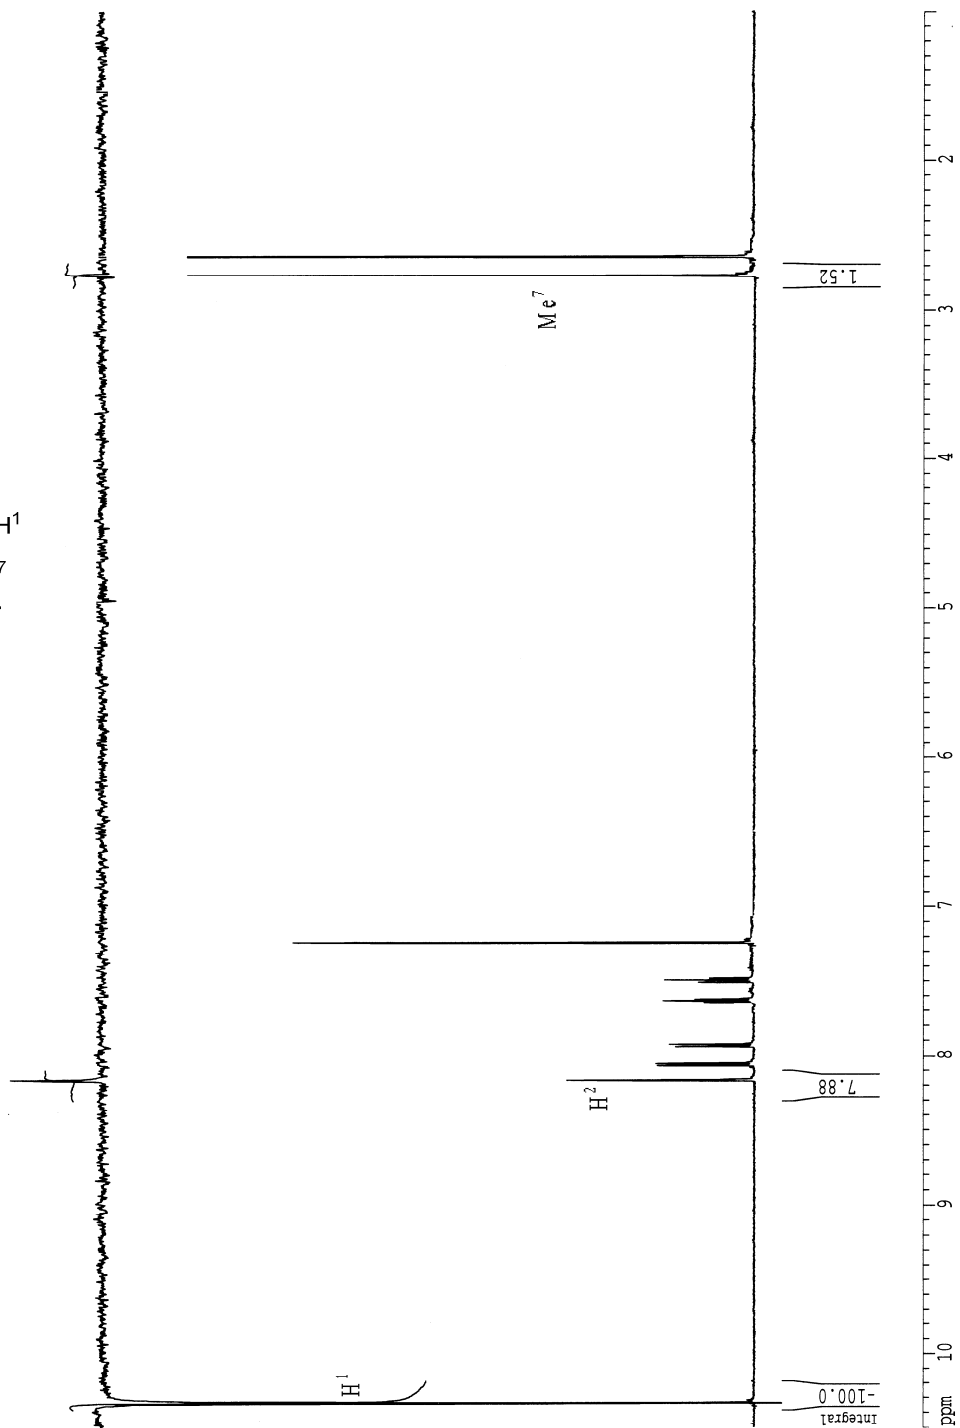

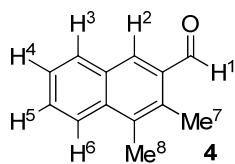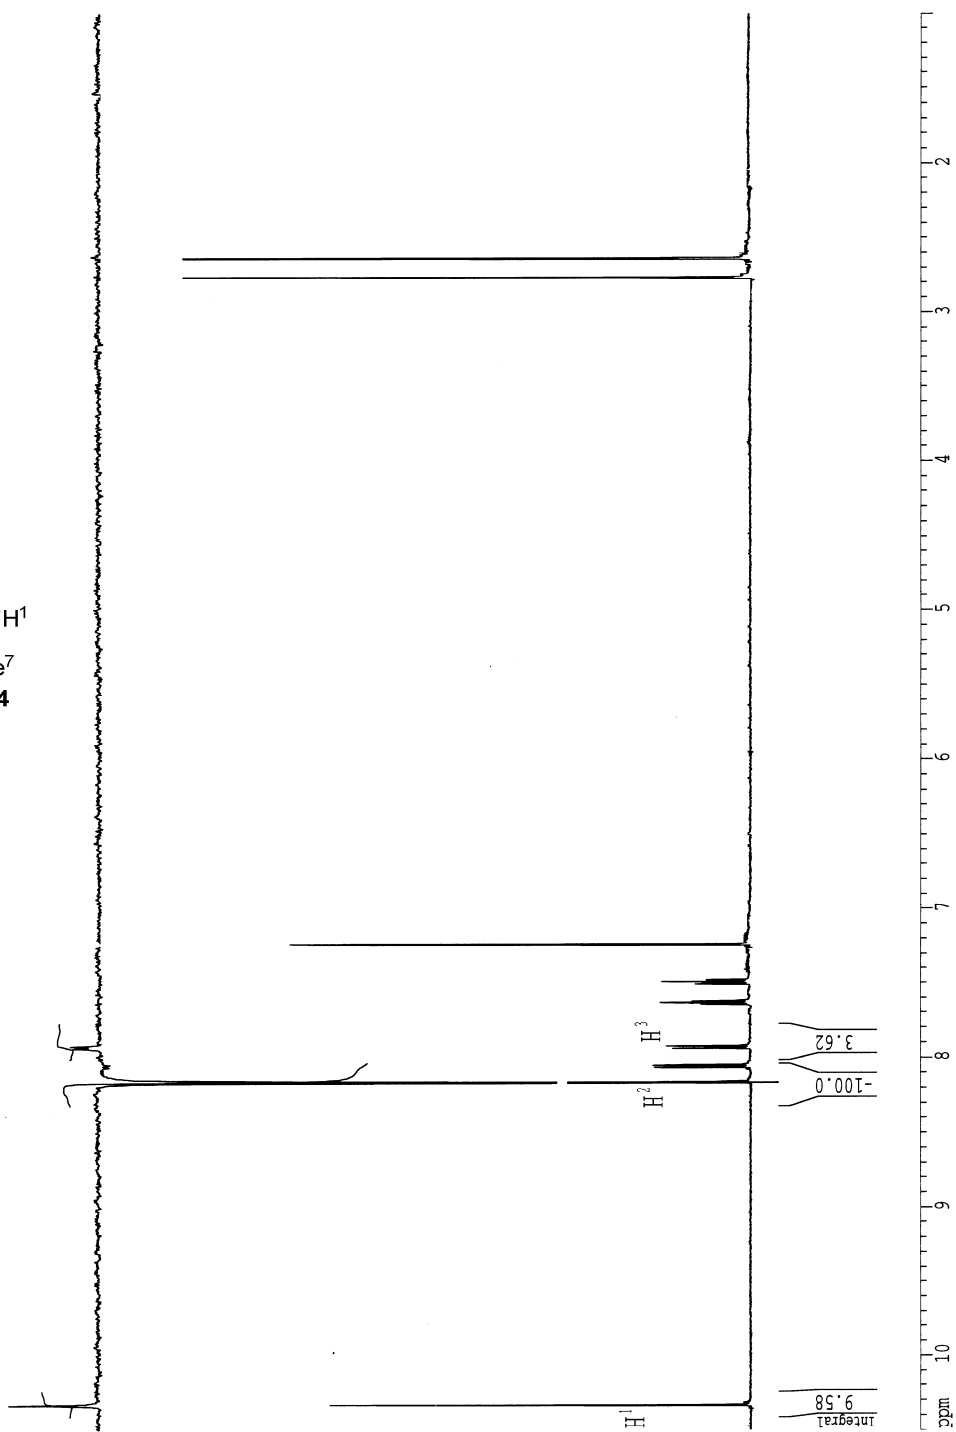

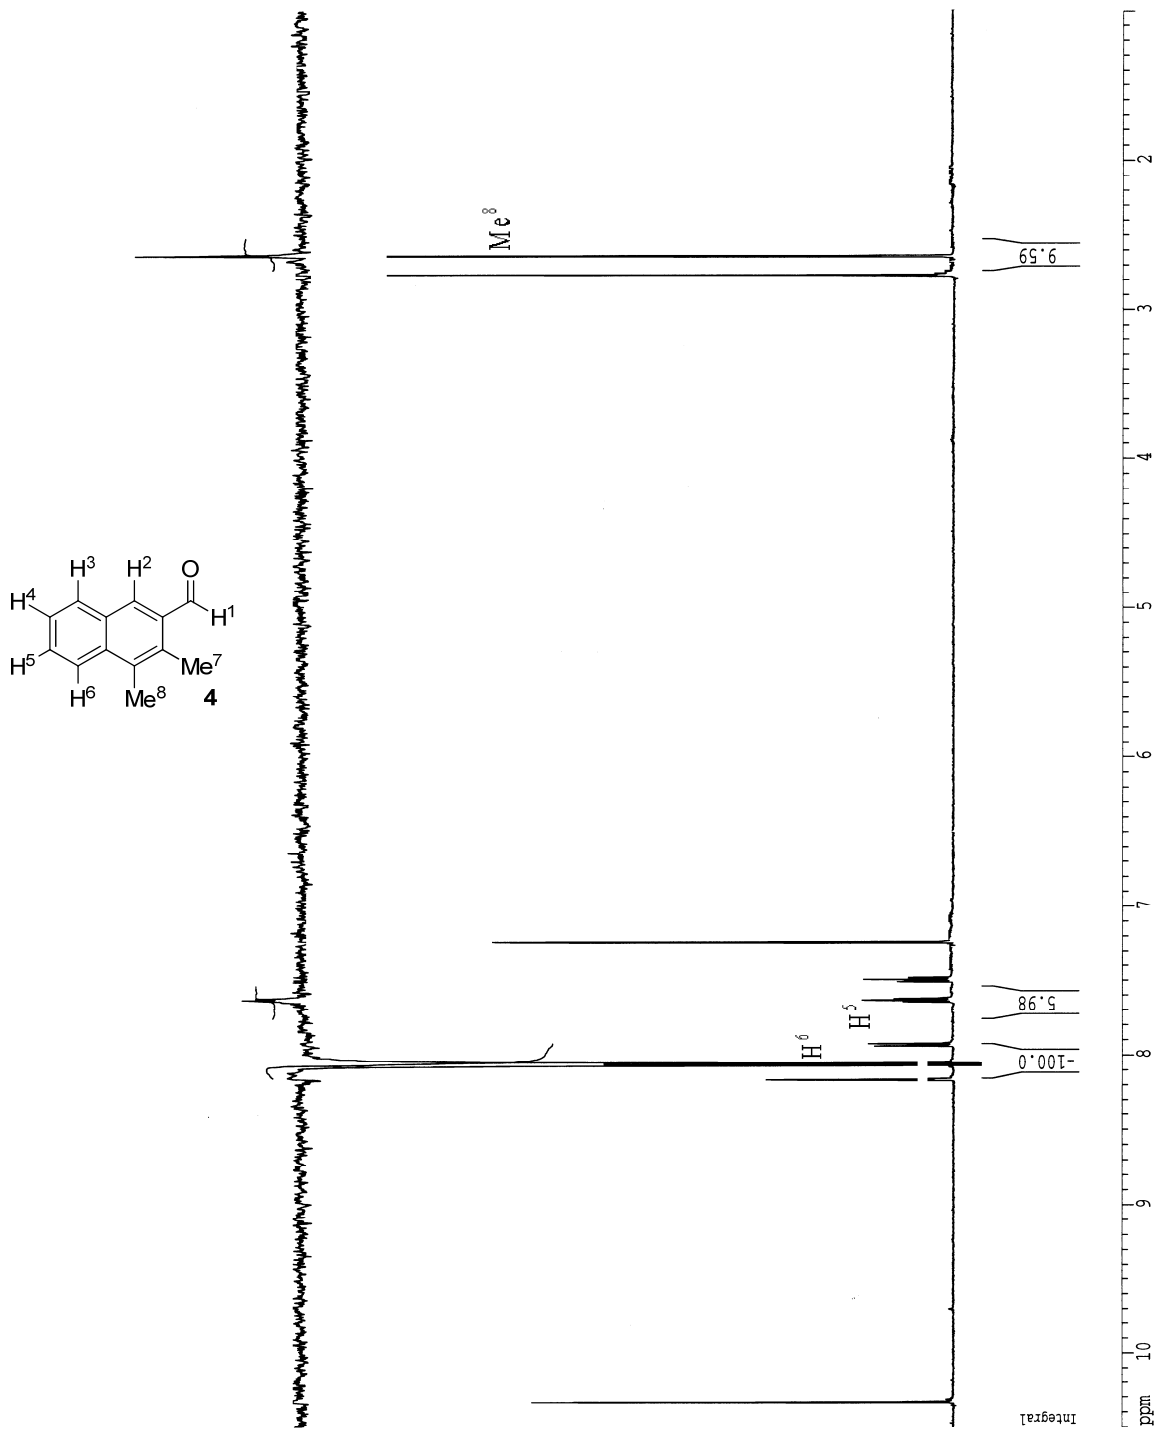

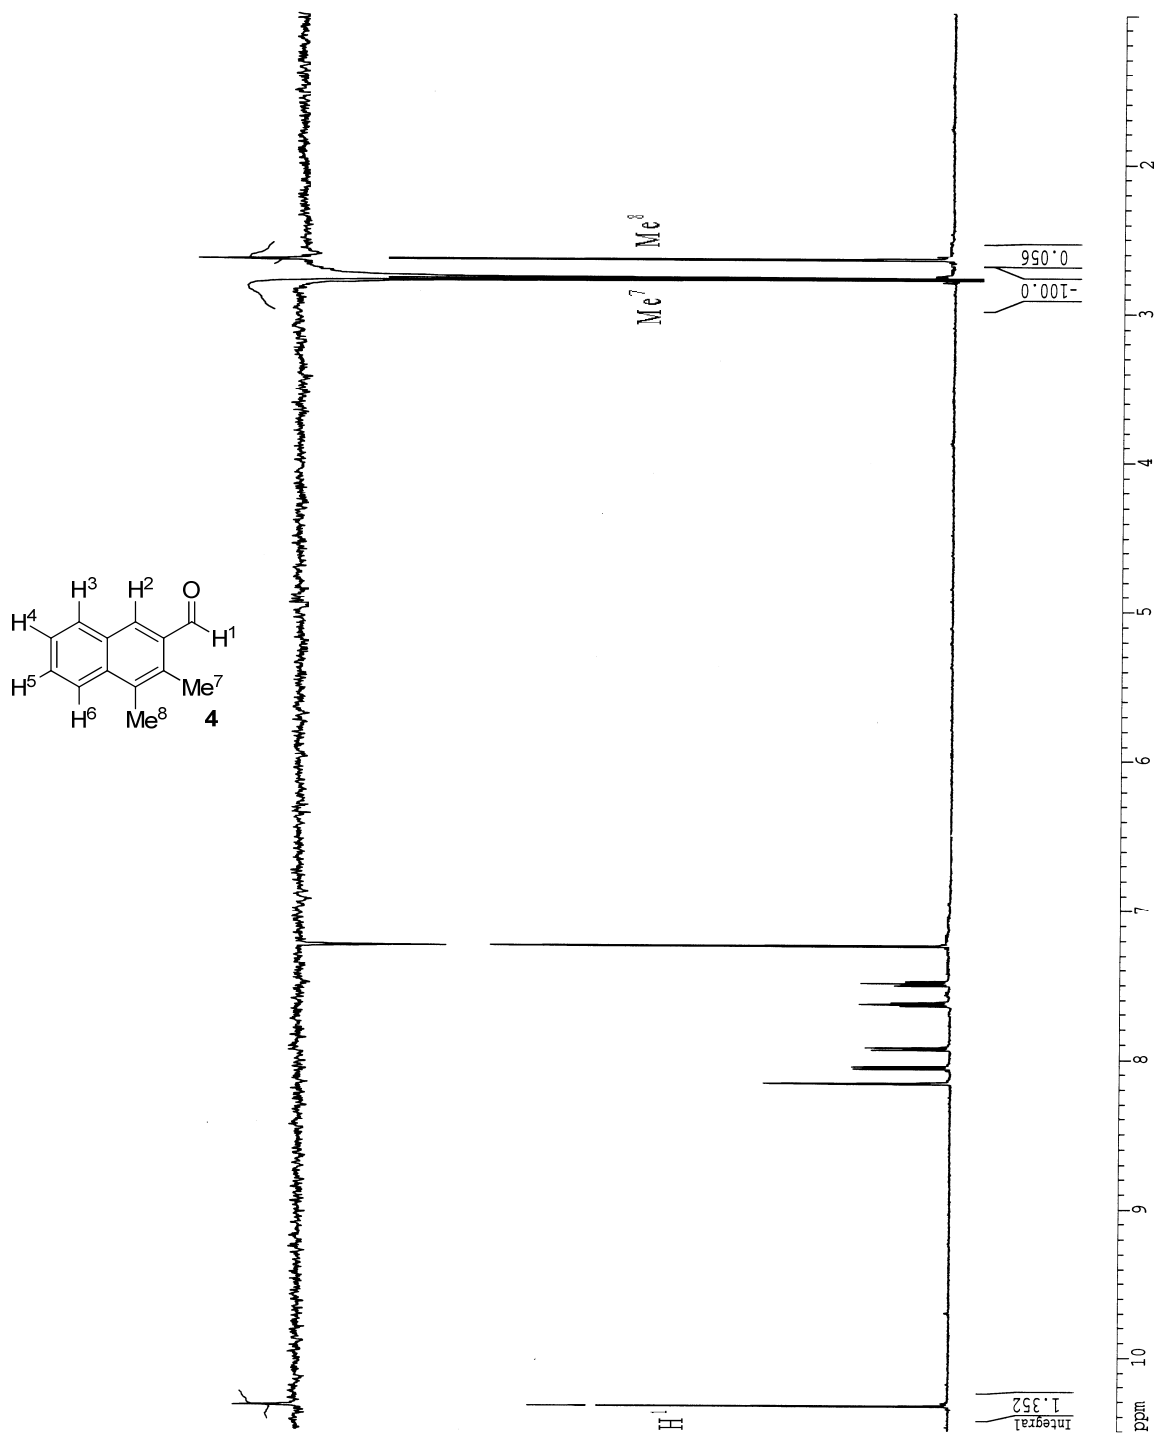

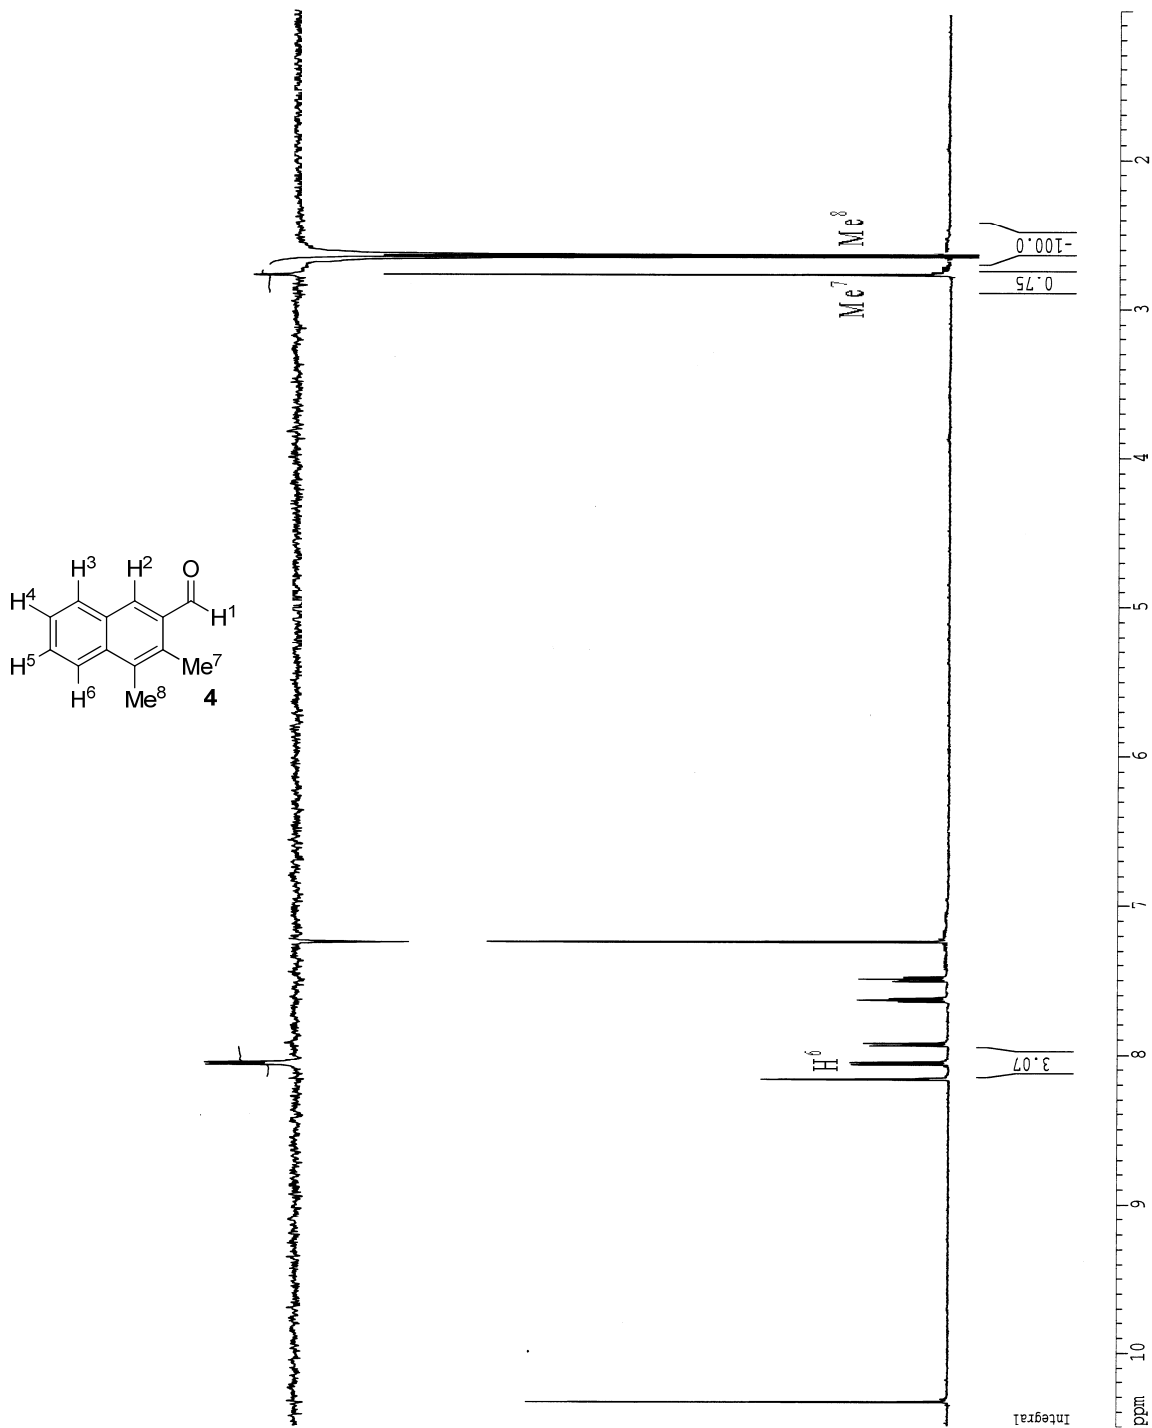

**(VII) X-Ray crystal structure and data of compound 6h-OH.**

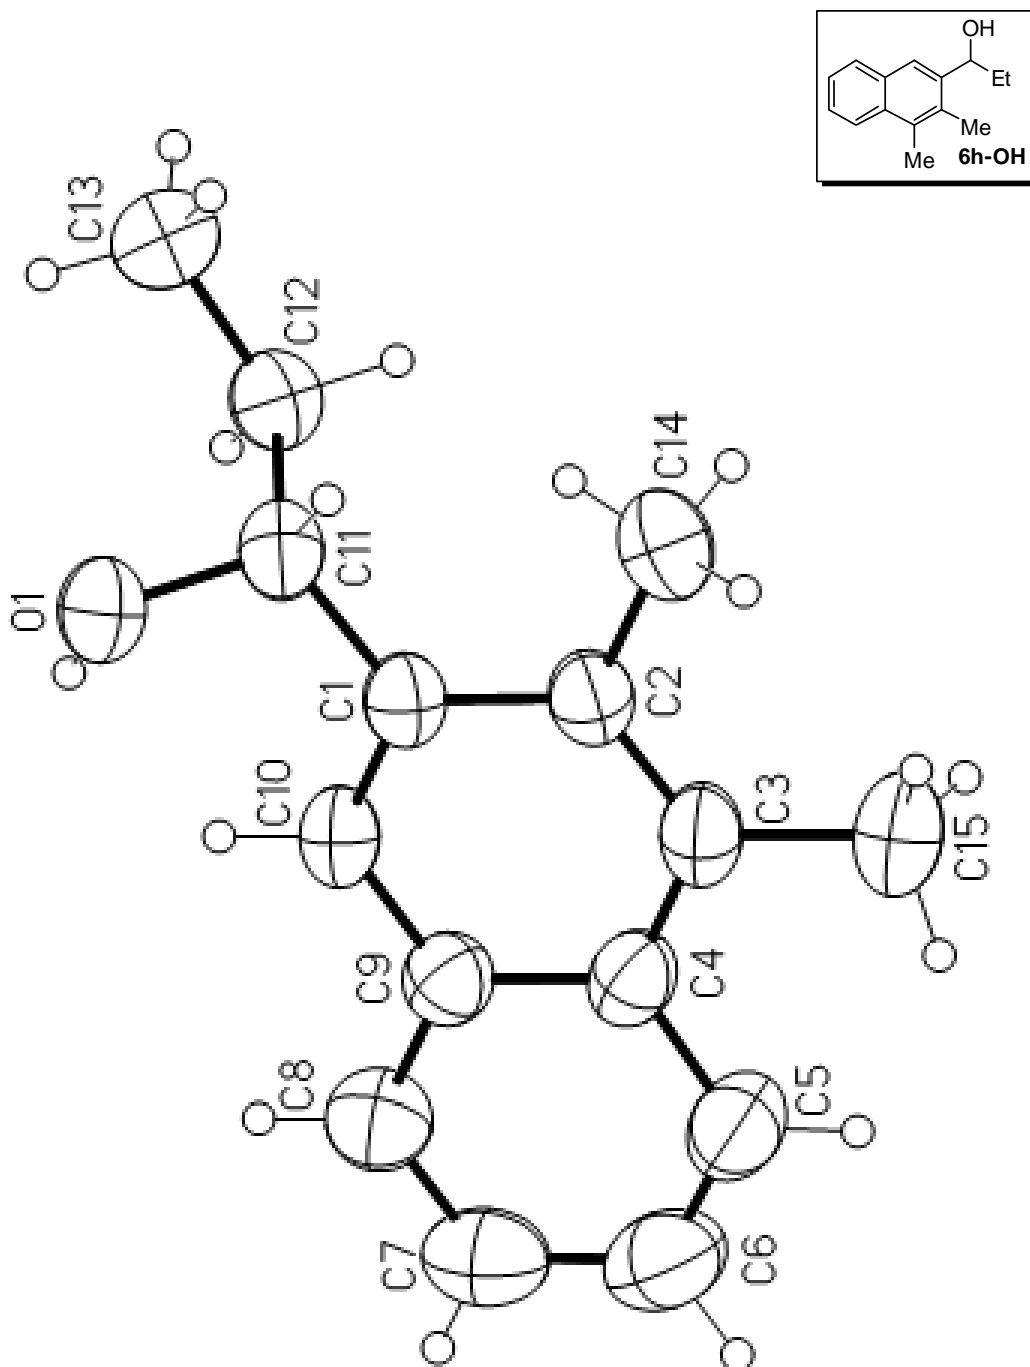

Figure 1



Table 1. Crystal data and structure refinement for 090725\_0M.

|                                   |                                                   |                 |
|-----------------------------------|---------------------------------------------------|-----------------|
| Identification code               | 090725_0m                                         |                 |
| Empirical formula                 | C <sub>15</sub> H <sub>18</sub> O                 |                 |
| Formula weight                    | 214.29                                            |                 |
| Temperature                       | 296(2) K                                          |                 |
| Wavelength                        | 0.71073 Å                                         |                 |
| Crystal system                    | Triclinic                                         |                 |
| Space group                       | P-1                                               |                 |
| Unit cell dimensions              | a = 8.5257(13) Å                                  | α = 86.572(7)°. |
|                                   | b = 11.462(2) Å                                   | β = 75.395(6)°. |
|                                   | c = 13.094(2) Å                                   | γ = 86.188(6)°. |
| Volume                            | 1234.2(4) Å <sup>3</sup>                          |                 |
| Z                                 | 4                                                 |                 |
| Density (calculated)              | 1.153 Mg/m <sup>3</sup>                           |                 |
| Absorption coefficient            | 0.070 mm <sup>-1</sup>                            |                 |
| F(000)                            | 464                                               |                 |
| Crystal size                      | 0.20 x 0.15 x 0.10 mm <sup>3</sup>                |                 |
| Theta range for data collection   | 1.61 to 26.40°.                                   |                 |
| Index ranges                      | -10 ≤ h ≤ 10, -14 ≤ k ≤ 14, 0 ≤ l ≤ 16            |                 |
| Reflections collected             | 5034                                              |                 |
| Independent reflections           | 5034 [R(int) = 0.0455]                            |                 |
| Completeness to theta = 26.40°    | 99.1 %                                            |                 |
| Absorption correction             | Empirical                                         |                 |
| Max. and min. transmission        | 0.745372 and 0.668054                             |                 |
| Refinement method                 | Full-matrix least-squares on F <sup>2</sup>       |                 |
| Data / restraints / parameters    | 5034 / 0 / 298                                    |                 |
| Goodness-of-fit on F <sup>2</sup> | 1.011                                             |                 |
| Final R indices [I > 2σ(I)]       | R <sub>1</sub> = 0.0622, wR <sub>2</sub> = 0.1491 |                 |
| R indices (all data)              | R <sub>1</sub> = 0.1429, wR <sub>2</sub> = 0.1911 |                 |
| Largest diff. peak and hole       | 0.215 and -0.226 e.Å <sup>-3</sup>                |                 |

Table 2. Atomic coordinates ( $\times 10^4$ ) and equivalent isotropic displacement parameters ( $\text{\AA}^2 \times 10^3$ ) for 090725\_0M.  $U(\text{eq})$  is defined as one third of the trace of the orthogonalized  $U^{ij}$  tensor.

|       | x        | y       | z        | U(eq) |
|-------|----------|---------|----------|-------|
| C(1)  | 5410(3)  | 2632(2) | 1215(2)  | 47(1) |
| C(2)  | 5857(3)  | 1520(2) | 1647(2)  | 49(1) |
| C(3)  | 5135(3)  | 1198(2) | 2681(2)  | 53(1) |
| C(4)  | 3951(3)  | 1955(2) | 3322(2)  | 52(1) |
| C(5)  | 3159(4)  | 1691(3) | 4401(2)  | 72(1) |
| C(6)  | 2035(4)  | 2440(3) | 4977(3)  | 80(1) |
| C(7)  | 1586(4)  | 3501(3) | 4534(3)  | 74(1) |
| C(8)  | 2313(3)  | 3801(3) | 3508(2)  | 64(1) |
| C(9)  | 3506(3)  | 3050(2) | 2885(2)  | 51(1) |
| C(10) | 4266(3)  | 3352(2) | 1826(2)  | 51(1) |
| C(11) | 6165(3)  | 3004(2) | 74(2)    | 51(1) |
| C(12) | 5192(3)  | 2623(2) | -664(2)  | 58(1) |
| C(13) | 5987(4)  | 2891(3) | -1826(2) | 73(1) |
| C(14) | 7104(4)  | 705(2)  | 969(2)   | 70(1) |
| C(15) | 5580(4)  | 19(3)   | 3155(3)  | 81(1) |
| C(16) | 8590(3)  | 3954(2) | 2264(2)  | 44(1) |
| C(17) | 7772(3)  | 3639(2) | 3324(2)  | 49(1) |
| C(18) | 8126(3)  | 2563(3) | 3768(2)  | 52(1) |
| C(19) | 9293(3)  | 1755(2) | 3174(2)  | 49(1) |
| C(20) | 9730(4)  | 633(3)  | 3572(2)  | 66(1) |
| C(21) | 10855(4) | -100(3) | 2977(3)  | 74(1) |
| C(22) | 11644(4) | 231(3)  | 1944(3)  | 69(1) |
| C(23) | 11261(3) | 1286(2) | 1530(2)  | 60(1) |
| C(24) | 10094(3) | 2077(2) | 2121(2)  | 47(1) |
| C(25) | 9712(3)  | 3183(2) | 1699(2)  | 47(1) |
| C(26) | 8290(3)  | 5160(2) | 1783(2)  | 50(1) |
| C(27) | 9369(3)  | 6052(2) | 2041(2)  | 59(1) |
| C(28) | 8953(4)  | 7304(3) | 1706(3)  | 86(1) |
| C(29) | 6513(3)  | 4487(3) | 3959(2)  | 71(1) |
| C(30) | 7270(4)  | 2234(3) | 4906(2)  | 82(1) |
| O(2)  | 8512(2)  | 5176(2) | 668(1)   | 62(1) |

O(1)                                      6323(2)                                      4244(2)                                      -76(2)                                      63(1)

---

Table 3. Bond lengths [Å] and angles [°] for 090725\_0M.

---

|              |          |
|--------------|----------|
| C(1)-C(10)   | 1.360(4) |
| C(1)-C(2)    | 1.431(3) |
| C(1)-C(11)   | 1.517(4) |
| C(2)-C(3)    | 1.379(4) |
| C(2)-C(14)   | 1.510(4) |
| C(3)-C(4)    | 1.422(4) |
| C(3)-C(15)   | 1.518(4) |
| C(4)-C(9)    | 1.417(4) |
| C(4)-C(5)    | 1.427(4) |
| C(5)-C(6)    | 1.352(4) |
| C(5)-H(5)    | 0.9300   |
| C(6)-C(7)    | 1.388(5) |
| C(6)-H(6)    | 0.9300   |
| C(7)-C(8)    | 1.364(4) |
| C(7)-H(7)    | 0.9300   |
| C(8)-C(9)    | 1.410(4) |
| C(8)-H(8)    | 0.9300   |
| C(9)-C(10)   | 1.408(4) |
| C(10)-H(10)  | 0.9300   |
| C(11)-O(1)   | 1.434(3) |
| C(11)-C(12)  | 1.522(4) |
| C(11)-H(11)  | 0.9800   |
| C(12)-C(13)  | 1.524(4) |
| C(12)-H(12A) | 0.9700   |
| C(12)-H(12B) | 0.9700   |
| C(13)-H(13A) | 0.9600   |
| C(13)-H(13B) | 0.9600   |
| C(13)-H(13C) | 0.9600   |
| C(14)-H(14A) | 0.9600   |
| C(14)-H(14B) | 0.9600   |
| C(14)-H(14C) | 0.9600   |

|              |          |
|--------------|----------|
| C(15)-H(15A) | 0.9600   |
| C(15)-H(15B) | 0.9600   |
| C(15)-H(15C) | 0.9600   |
| C(16)-C(25)  | 1.361(3) |
| C(16)-C(17)  | 1.425(3) |
| C(16)-C(26)  | 1.517(3) |
| C(17)-C(18)  | 1.379(4) |
| C(17)-C(29)  | 1.515(4) |
| C(18)-C(19)  | 1.423(4) |
| C(18)-C(30)  | 1.522(4) |
| C(19)-C(24)  | 1.414(3) |
| C(19)-C(20)  | 1.422(4) |
| C(20)-C(21)  | 1.352(4) |
| C(20)-H(20)  | 0.9300   |
| C(21)-C(22)  | 1.393(4) |
| C(21)-H(21)  | 0.9300   |
| C(22)-C(23)  | 1.349(4) |
| C(22)-H(22)  | 0.9300   |
| C(23)-C(24)  | 1.410(4) |
| C(23)-H(23)  | 0.9300   |
| C(24)-C(25)  | 1.404(3) |
| C(25)-H(25)  | 0.9300   |
| C(26)-O(2)   | 1.423(3) |
| C(26)-C(27)  | 1.527(4) |
| C(26)-H(26)  | 0.9800   |
| C(27)-C(28)  | 1.521(4) |
| C(27)-H(27A) | 0.9700   |
| C(27)-H(27B) | 0.9700   |
| C(28)-H(28A) | 0.9600   |
| C(28)-H(28B) | 0.9600   |
| C(28)-H(28C) | 0.9600   |
| C(29)-H(29A) | 0.9600   |
| C(29)-H(29B) | 0.9600   |
| C(29)-H(29C) | 0.9600   |
| C(30)-H(30A) | 0.9600   |
| C(30)-H(30B) | 0.9600   |

|                  |          |
|------------------|----------|
| C(30)-H(30C)     | 0.9600   |
| O(2)-H(2)        | 0.8200   |
| O(1)-H(1)        | 0.8200   |
|                  |          |
| C(10)-C(1)-C(2)  | 119.6(2) |
| C(10)-C(1)-C(11) | 119.6(2) |
| C(2)-C(1)-C(11)  | 120.7(2) |
| C(3)-C(2)-C(1)   | 119.5(2) |
| C(3)-C(2)-C(14)  | 120.4(2) |
| C(1)-C(2)-C(14)  | 120.1(3) |
| C(2)-C(3)-C(4)   | 120.8(2) |
| C(2)-C(3)-C(15)  | 120.5(3) |
| C(4)-C(3)-C(15)  | 118.7(3) |
| C(9)-C(4)-C(3)   | 119.3(2) |
| C(9)-C(4)-C(5)   | 116.5(3) |
| C(3)-C(4)-C(5)   | 124.2(3) |
| C(6)-C(5)-C(4)   | 122.0(3) |
| C(6)-C(5)-H(5)   | 119.0    |
| C(4)-C(5)-H(5)   | 119.0    |
| C(5)-C(6)-C(7)   | 121.0(3) |
| C(5)-C(6)-H(6)   | 119.5    |
| C(7)-C(6)-H(6)   | 119.5    |
| C(8)-C(7)-C(6)   | 119.5(3) |
| C(8)-C(7)-H(7)   | 120.3    |
| C(6)-C(7)-H(7)   | 120.3    |
| C(7)-C(8)-C(9)   | 121.2(3) |
| C(7)-C(8)-H(8)   | 119.4    |
| C(9)-C(8)-H(8)   | 119.4    |
| C(10)-C(9)-C(8)  | 121.7(3) |
| C(10)-C(9)-C(4)  | 118.4(3) |
| C(8)-C(9)-C(4)   | 119.8(3) |
| C(1)-C(10)-C(9)  | 122.3(2) |
| C(1)-C(10)-H(10) | 118.8    |
| C(9)-C(10)-H(10) | 118.8    |
| O(1)-C(11)-C(1)  | 112.6(2) |
| O(1)-C(11)-C(12) | 108.5(2) |

|                     |          |
|---------------------|----------|
| C(1)-C(11)-C(12)    | 111.6(2) |
| O(1)-C(11)-H(11)    | 108.0    |
| C(1)-C(11)-H(11)    | 108.0    |
| C(12)-C(11)-H(11)   | 108.0    |
| C(11)-C(12)-C(13)   | 113.2(2) |
| C(11)-C(12)-H(12A)  | 108.9    |
| C(13)-C(12)-H(12A)  | 108.9    |
| C(11)-C(12)-H(12B)  | 108.9    |
| C(13)-C(12)-H(12B)  | 108.9    |
| H(12A)-C(12)-H(12B) | 107.8    |
| C(12)-C(13)-H(13A)  | 109.5    |
| C(12)-C(13)-H(13B)  | 109.5    |
| H(13A)-C(13)-H(13B) | 109.5    |
| C(12)-C(13)-H(13C)  | 109.5    |
| H(13A)-C(13)-H(13C) | 109.5    |
| H(13B)-C(13)-H(13C) | 109.5    |
| C(2)-C(14)-H(14A)   | 109.5    |
| C(2)-C(14)-H(14B)   | 109.5    |
| H(14A)-C(14)-H(14B) | 109.5    |
| C(2)-C(14)-H(14C)   | 109.5    |
| H(14A)-C(14)-H(14C) | 109.5    |
| H(14B)-C(14)-H(14C) | 109.5    |
| C(3)-C(15)-H(15A)   | 109.5    |
| C(3)-C(15)-H(15B)   | 109.5    |
| H(15A)-C(15)-H(15B) | 109.5    |
| C(3)-C(15)-H(15C)   | 109.5    |
| H(15A)-C(15)-H(15C) | 109.5    |
| H(15B)-C(15)-H(15C) | 109.5    |
| C(25)-C(16)-C(17)   | 119.3(2) |
| C(25)-C(16)-C(26)   | 119.9(2) |
| C(17)-C(16)-C(26)   | 120.7(2) |
| C(18)-C(17)-C(16)   | 119.9(2) |
| C(18)-C(17)-C(29)   | 120.3(2) |
| C(16)-C(17)-C(29)   | 119.8(3) |
| C(17)-C(18)-C(19)   | 120.7(2) |
| C(17)-C(18)-C(30)   | 119.9(3) |

|                     |          |
|---------------------|----------|
| C(19)-C(18)-C(30)   | 119.4(3) |
| C(24)-C(19)-C(20)   | 116.9(3) |
| C(24)-C(19)-C(18)   | 118.9(2) |
| C(20)-C(19)-C(18)   | 124.2(3) |
| C(21)-C(20)-C(19)   | 121.9(3) |
| C(21)-C(20)-H(20)   | 119.0    |
| C(19)-C(20)-H(20)   | 119.0    |
| C(20)-C(21)-C(22)   | 120.5(3) |
| C(20)-C(21)-H(21)   | 119.7    |
| C(22)-C(21)-H(21)   | 119.7    |
| C(23)-C(22)-C(21)   | 119.6(3) |
| C(23)-C(22)-H(22)   | 120.2    |
| C(21)-C(22)-H(22)   | 120.2    |
| C(22)-C(23)-C(24)   | 121.7(3) |
| C(22)-C(23)-H(23)   | 119.2    |
| C(24)-C(23)-H(23)   | 119.2    |
| C(25)-C(24)-C(23)   | 121.9(2) |
| C(25)-C(24)-C(19)   | 118.8(2) |
| C(23)-C(24)-C(19)   | 119.3(2) |
| C(16)-C(25)-C(24)   | 122.4(2) |
| C(16)-C(25)-H(25)   | 118.8    |
| C(24)-C(25)-H(25)   | 118.8    |
| O(2)-C(26)-C(16)    | 113.4(2) |
| O(2)-C(26)-C(27)    | 108.7(2) |
| C(16)-C(26)-C(27)   | 111.6(2) |
| O(2)-C(26)-H(26)    | 107.6    |
| C(16)-C(26)-H(26)   | 107.6    |
| C(27)-C(26)-H(26)   | 107.6    |
| C(28)-C(27)-C(26)   | 113.5(2) |
| C(28)-C(27)-H(27A)  | 108.9    |
| C(26)-C(27)-H(27A)  | 108.9    |
| C(28)-C(27)-H(27B)  | 108.9    |
| C(26)-C(27)-H(27B)  | 108.9    |
| H(27A)-C(27)-H(27B) | 107.7    |
| C(27)-C(28)-H(28A)  | 109.5    |
| C(27)-C(28)-H(28B)  | 109.5    |

|                     |       |
|---------------------|-------|
| H(28A)-C(28)-H(28B) | 109.5 |
| C(27)-C(28)-H(28C)  | 109.5 |
| H(28A)-C(28)-H(28C) | 109.5 |
| H(28B)-C(28)-H(28C) | 109.5 |
| C(17)-C(29)-H(29A)  | 109.5 |
| C(17)-C(29)-H(29B)  | 109.5 |
| H(29A)-C(29)-H(29B) | 109.5 |
| C(17)-C(29)-H(29C)  | 109.5 |
| H(29A)-C(29)-H(29C) | 109.5 |
| H(29B)-C(29)-H(29C) | 109.5 |
| C(18)-C(30)-H(30A)  | 109.5 |
| C(18)-C(30)-H(30B)  | 109.5 |
| H(30A)-C(30)-H(30B) | 109.5 |
| C(18)-C(30)-H(30C)  | 109.5 |
| H(30A)-C(30)-H(30C) | 109.5 |
| H(30B)-C(30)-H(30C) | 109.5 |
| C(26)-O(2)-H(2)     | 109.5 |
| C(11)-O(1)-H(1)     | 109.5 |

---

Symmetry transformations used to generate equivalent atoms:

Table 4. Anisotropic displacement parameters ( $\text{\AA}^2 \times 10^3$ ) for 090725\_0M. The anisotropic displacement factor exponent takes the form:  $-2\pi^2 [ h^2 a^{*2}U^{11} + \dots + 2 h k a^* b^* U^{12} ]$

|       | U <sup>11</sup> | U <sup>22</sup> | U <sup>33</sup> | U <sup>23</sup> | U <sup>13</sup> | U <sup>12</sup> |
|-------|-----------------|-----------------|-----------------|-----------------|-----------------|-----------------|
| C(1)  | 48(2)           | 42(2)           | 52(2)           | 2(1)            | -14(1)          | -5(1)           |
| C(2)  | 52(2)           | 42(2)           | 56(2)           | 0(1)            | -18(1)          | -4(1)           |
| C(3)  | 59(2)           | 44(2)           | 62(2)           | 8(1)            | -27(2)          | -8(1)           |
| C(4)  | 57(2)           | 53(2)           | 49(2)           | 6(1)            | -20(1)          | -13(1)          |
| C(5)  | 91(2)           | 69(2)           | 58(2)           | 11(2)           | -23(2)          | -14(2)          |
| C(6)  | 89(2)           | 95(3)           | 54(2)           | -3(2)           | -10(2)          | -15(2)          |
| C(7)  | 68(2)           | 87(3)           | 65(2)           | -19(2)          | -7(2)           | -6(2)           |
| C(8)  | 62(2)           | 66(2)           | 63(2)           | -6(2)           | -15(2)          | -4(2)           |
| C(9)  | 52(2)           | 50(2)           | 51(2)           | 0(1)            | -14(1)          | -8(1)           |
| C(10) | 55(2)           | 42(2)           | 57(2)           | 6(1)            | -17(1)          | 0(1)            |



|       |        |       |        |        |        |        |
|-------|--------|-------|--------|--------|--------|--------|
| C(11) | 50(2)  | 44(2) | 57(2)  | 4(1)   | -11(1) | -2(1)  |
| C(12) | 67(2)  | 50(2) | 58(2)  | -1(1)  | -15(2) | -9(1)  |
| C(13) | 91(2)  | 72(2) | 56(2)  | -3(2)  | -18(2) | -4(2)  |
| C(14) | 80(2)  | 52(2) | 76(2)  | -2(2)  | -20(2) | 9(2)   |
| C(15) | 104(3) | 60(2) | 79(2)  | 17(2)  | -27(2) | 2(2)   |
| C(16) | 39(1)  | 51(2) | 43(2)  | -6(1)  | -7(1)  | -4(1)  |
| C(17) | 42(1)  | 63(2) | 41(2)  | -12(1) | -3(1)  | -6(1)  |
| C(18) | 49(2)  | 68(2) | 38(2)  | 0(1)   | -4(1)  | -15(1) |
| C(19) | 52(2)  | 50(2) | 47(2)  | 4(1)   | -14(1) | -9(1)  |
| C(20) | 77(2)  | 65(2) | 58(2)  | 13(2)  | -19(2) | -13(2) |
| C(21) | 95(2)  | 53(2) | 78(2)  | 5(2)   | -32(2) | 4(2)   |
| C(22) | 75(2)  | 56(2) | 75(2)  | -9(2)  | -20(2) | 10(2)  |
| C(23) | 65(2)  | 53(2) | 57(2)  | -4(2)  | -10(2) | 5(2)   |
| C(24) | 47(2)  | 48(2) | 46(2)  | -3(1)  | -10(1) | -5(1)  |
| C(25) | 50(2)  | 51(2) | 35(1)  | 0(1)   | -1(1)  | -4(1)  |
| C(26) | 46(2)  | 52(2) | 48(2)  | -5(1)  | -10(1) | 4(1)   |
| C(27) | 67(2)  | 55(2) | 56(2)  | -8(1)  | -17(2) | 0(1)   |
| C(28) | 107(3) | 51(2) | 107(3) | -9(2)  | -39(2) | -2(2)  |
| C(29) | 62(2)  | 87(2) | 57(2)  | -22(2) | 3(2)   | 1(2)   |
| C(30) | 88(2)  | 99(3) | 50(2)  | 8(2)   | 2(2)   | -15(2) |
| O(2)  | 81(1)  | 56(1) | 50(1)  | -2(1)  | -21(1) | 5(1)   |
| O(1)  | 76(1)  | 49(1) | 61(1)  | 7(1)   | -11(1) | -13(1) |

Table 5. Hydrogen coordinates ( $\times 10^4$ ) and isotropic displacement parameters ( $\text{\AA}^2 \times 10^3$ ) for 090725\_0M.

|       | x    | y    | z    | U(eq) |
|-------|------|------|------|-------|
| H(5)  | 3425 | 982  | 4716 | 86    |
| H(6)  | 1555 | 2241 | 5680 | 96    |
| H(7)  | 796  | 4003 | 4933 | 89    |
| H(8)  | 2017 | 4514 | 3214 | 76    |
| H(10) | 3977 | 4069 | 1535 | 62    |
| H(11) | 7254 | 2622 | -131 | 61    |

|        |       |      |       |     |
|--------|-------|------|-------|-----|
| H(12A) | 4121  | 3016 | -486  | 70  |
| H(12B) | 5056  | 1788 | -553  | 70  |
| H(13A) | 6030  | 3723 | -1956 | 109 |
| H(13B) | 5363  | 2582 | -2254 | 109 |
| H(13C) | 7068  | 2537 | -2000 | 109 |
| H(14A) | 7839  | 373  | 1368  | 105 |
| H(14B) | 7698  | 1134 | 357   | 105 |
| H(14C) | 6566  | 89   | 751   | 105 |
| H(15A) | 6672  | -226 | 2804  | 122 |
| H(15B) | 4851  | -548 | 3066  | 122 |
| H(15C) | 5499  | 86   | 3894  | 122 |
| H(20)  | 9228  | 396  | 4263  | 80  |
| H(21)  | 11105 | -832 | 3260  | 89  |
| H(22)  | 12429 | -272 | 1542  | 83  |
| H(23)  | 11781 | 1497 | 836   | 71  |
| H(25)  | 10244 | 3396 | 1008  | 57  |
| H(26)  | 7160  | 5415 | 2095  | 59  |
| H(27A) | 9271  | 6008 | 2797  | 71  |
| H(27B) | 10491 | 5847 | 1693  | 71  |
| H(28A) | 9110  | 7367 | 952   | 129 |
| H(28B) | 9646  | 7824 | 1911  | 129 |
| H(28C) | 7841  | 7513 | 2041  | 129 |
| H(29A) | 5449  | 4208 | 4037  | 107 |
| H(29B) | 6581  | 5243 | 3598  | 107 |
| H(29C) | 6710  | 4546 | 4644  | 107 |
| H(30A) | 7325  | 2858 | 5350  | 124 |
| H(30B) | 7790  | 1533 | 5135  | 124 |
| H(30C) | 6154  | 2101 | 4950  | 124 |
| H(2)   | 9271  | 4719 | 411   | 92  |
| H(1)   | 5465  | 4585 | 217   | 95  |

---
